# Supplementary material for: Multiple motors cooperate to establish and maintain acentrosomal spindle bipolarity in C. elegans oocyte meiosis
Source: eLife. 2022 Feb 11;11:e72872. doi: 10.7554/eLife.72872 (PMC8963883; doi:10.7554/eLife.72872)
Supplement: Figure 2—figure supplement 1—source data 1. — The spindle length measurements (in μm) are provided for each image, as well as the averages lengths and standard errors with and without auxin. [file elife-72872-fig2-figsupp1-data1.xlsx]

## Sheet: Unarrested (empty vector RNAi)
Spindle length measurements for unarrested spindles, plus and minus auxin
No Auxin		With Auxin			Average Length		Standard Error
File Name	Spindle Length	File Name	Spindle Length		No Auxin	With Auxin	No Auxin	With Auxin
022019_EV 0minAux_28	6.48	031620_EV 30minAux_01	10.6		6.0739	9.20275	0.109628	0.257061
022019_EV 0minAux_29	7.44	031620_EV 30minAux_02	9.51
022019_EV 0minAux_30	6.65	031620_EV 30minAux_06	7.2
032519_EV 0minAux_04	5.32	110619_EV 30minAux_05	8.27
032519_EV 0minAux_11	6.31	110619_EV 30minAux_06	8.06
032519_EV 0minAux_15	5.77	110619_EV 30minAux_15	7.21
040819_EV 0minAux_06	6.01	110619_EV 30minAux_16	9.36
040819_EV 0minAux_11	5.51	110619_EV 30minAux_23	10.4
040819_EV 0minAux_16	6.02	110619_EV 45minAux_01	12.4
040819_EV 0minAux_21	5.93	110619_EV 45minAux_04	9.68
040819_EV 0minAux_27	5.66	110619_EV 45minAux_07	7.92
040819_EV 0minAux_28	5.52	110619_EV 45minAux_08	9.66
042419_EV 0minAux_15	5.04	110619_EV 45minAux_10	13.1
042419_EV 0minAux_21	6.21	110619_EV 45minAux_12	11.9
050119_EV 0minAux_02	5.23	110619_EV 45minAux_14	8.32
050119_EV 0minAux_13	6.24	110619_EV 45minAux_15	9.6
050119_EV 0minAux_19	5.12	110619_EV 45minAux_18	7.85
050619_EV 0minAux_18	7.26	110619_EV 45minAux_21	9.26
050619_EV 0minAux_23	6.18	110619_EV 45minAux_25	8.79
050819_EV 0minAux_02	6.8	110619_EV 45minAux_27	10.3
050819_EV 0minAux_08	5.77	110619_EV 45minAux_28	12.6
050819_EV 0minAux_10	5.12	111119_EV 30minAux_05	10.4
050819_EV 0minAux_11	6.57	111119_EV 30minAux_10	8.45
031620_EV 0minAux_02	4.96	111119_EV 30minAux_11	8.26
031620_EV 0minAux_03	6.13	111119_EV 45minAux_02	8.72
031620_EV 0minAux_13	6.44	111119_EV 45minAux_03	9.43
111119_EV 0minAux_02	6.7	111119_EV 45minAux_06	8.54
111119_EV 0minAux_07	6.79	111119_EV 45minAux_07	9.77
111119_EV 0minAux_12	5.51	111119_EV 45minAux_09	9.11
071320_EV 0hrAux_03	6.6	111119_EV 45minAux_12	9.86
071320_EV 0hrAux_13	5.74	111119_EV 45minAux_13	8.36
071320_EV 0hrAux_15	4.98	111119_EV 45minAux_14	7.9
071320_EV 0hrAux_19	6.6	111119_EV 45minAux_16	7.58
071320_EV 0hrAux_26	5.63	111119_EV 45minAux_18	6.7
071320_EV 0hrAux_27	5.3	111119_EV 45minAux_19	12.5
071320_EV 0hrAux_35	6.61	111119_EV 45minAux_21	10.2
071320_EV 0hrAux_51	7.25	111119_EV 45minAux_22	8.14
071320_EV 0hrAux_55	5.12	111119_EV 45minAux_23	7.36
071320_EV 0hrAux_61	7.17	111119_EV 45minAux_24	6.9
071320_EV 0hrAux_66	6.92	111119_EV 45minAux_25	7.94
071320_EV 0hrAux_68	6.42

## Sheet: Arrested (emb-30 RNAi)
Spindle length measurements for Metaphase I-arrested spindles, plus and minus auxin
No Auxin		With Auxin			Average Length		Standard Error
File Name	Spindle Length	File Name	Spindle Length		No Auxin	With Auxin	No Auxin	With Auxin
070620_Emb30 0minAux_01	7.31	070620_Emb30 30minAux_01	11.4		8.00229	11.719	0.113786	0.175845
070620_Emb30 0minAux_02	9.05	070620_Emb30 30minAux_10	12.3
070620_Emb30 0minAux_09	8.69	070620_Emb30 30minAux_23	12
070620_Emb30 0minAux_10	8.44	070620_Emb30 30minAux_26	10.9
070620_Emb30 0minAux_11	8.51	070620_Emb30 30minAux_33	11.5
070620_Emb30 0minAux_15	8.8	070620_Emb30 30minAux_34	11.1
070620_Emb30 0minAux_17	8.61	072020_Emb30 30minAux_01	10.3
070620_Emb30 0minAux_22	8.39	072020_Emb30 30minAux_02	12.4
070620_Emb30 0minAux_33	8.18	072020_Emb30 30minAux_03	11.5
072020_Emb30 0minAux_01	8.16	072020_Emb30 30minAux_06	10.2
072020_Emb30 0minAux_02	7.42	072020_Emb30 30minAux_07	12.7
072020_Emb30 0minAux_03	7.23	072020_Emb30 30minAux_08	10.3
072020_Emb30 0minAux_05	7.54	072020_Emb30 30minAux_11	12.7
072020_Emb30 0minAux_06	8.16	072020_Emb30 30minAux_13	12.2
072020_Emb30 0minAux_07	7.36	072020_Emb30 30minAux_14	10.1
072020_Emb30 0minAux_08	7.41	072020_Emb30 30minAux_15	9.72
072020_Emb30 0minAux_09	6.57	072020_Emb30 30minAux_23	12.9
072020_Emb30 0minAux_11	7.15	072020_Emb30 30minAux_24	12.3
072020_Emb30 0minAux_15	8.01	072020_Emb30 30minAux_26	13.4
072020_Emb30 0minAux_16	7.93	072020_Emb30 30minAux_27	14.2
072020_Emb30 0minAux_18	6.87	072020_Emb30 30minAux_28	11.8
072020_Emb30 0minAux_22	6.93	072020_Emb30 30minAux_29	11.2
072020_Emb30 0minAux_23	7.4	072020_Emb30 30minAux_30	12.1
072020_Emb30 0minAux_24	7.45	072020_Emb30 30minAux_36	11.5
072020_Emb30 0minAux_27	7.59	072020_Emb30 30minAux_37	12.3
072020_Emb30 0minAux_30	9.01	072020_Emb30 30minAux_42	11.4
072020_Emb30 0minAux_32	8.5	072020_Emb30 30minAux_44	11
072020_Emb30 0minAux_33	8.02	072020_Emb30 30minAux_45	10.9
072020_Emb30 0minAux_35	8.16	072020_Emb30 30minAux_47	9.74
072020_Emb30 0minAux_39	8.11	072020_Emb30 30minAux_48	12.6
072020_Emb30 0minAux_40	8.31	072020_Emb30 30minAux_53	13.3
072020_Emb30 0minAux_41	8.23	072020_Emb30 30minAux_54	13.9
072020_Emb30 0minAux_44	9.01	072020_Emb30 30minAux_56	10.9
072020_Emb30 0minAux_46	8.69	072020_Emb30 30minAux_59	12.4
072020_Emb30 0minAux_47	8.88	072020_Emb30 30minAux_61	11.8
		072020_Emb30 30minAux_63	11.4
		072020_Emb30 30minAux_64	13.5
		072020_Emb30 30minAux_67	10.9
		072020_Emb30 30minAux_68	11.3
		072020_Emb30 30minAux_71	10.7
		072020_Emb30 30minAux_72	12.9
		072020_Emb30 30minAux_73	12.7
		072020_Emb30 30minAux_75	14.1
