# Supplementary material for: Multiple motors cooperate to establish and maintain acentrosomal spindle bipolarity in C. elegans oocyte meiosis
Source: eLife. 2022 Feb 11;11:e72872. doi: 10.7554/eLife.72872 (PMC8963883; doi:10.7554/eLife.72872)
Supplement: Figure 2—figure supplement 1—source data 2. — The raw intensity at each position across the spindle is provided for each image, as well as the average values and standard errors with and without auxin. [file elife-72872-fig2-figsupp1-data2.xlsx]

## Sheet: Unarrested (empty vector RNAi)
Measurements of ASPM-1 intensity across unarrested spindles; minus auxin images are at the top and plus auxin images are below
Distance	022019_EV 0minAux_28	022019_EV 0minAux_29	022019_EV 0minAux_30	032519_EV 0minAux_04	032519_EV 0minAux_11	032519_EV 0minAux_15	040819_EV 0minAux_06	040819_EV 0minAux_11	040819_EV 0minAux_16	040819_EV 0minAux_21	040819_EV 0minAux_27	040819_EV 0minAux_28	042419_EV 0minAux_15	042419_EV 0minAux_21	050119_EV 0minAux_02	050119_EV 0minAux_13	050119_EV 0minAux_19	050619_EV 0minAux_18	050619_EV 0minAux_23	050819_EV 0minAux_02	050819_EV 0minAux_08	050819_EV 0minAux_10	050819_EV 0minAux_11	031620_EV 0minAux_02	031620_EV 0minAux_03	031620_EV 0minAux_13	111119_EV 0minAux_02	111119_EV 0minAux_07	111119_EV 0minAux_12	071320_EV 0hrAux_03	071320_EV 0hrAux_13	071320_EV 0hrAux_15	071320_EV 0hrAux_19	071320_EV 0hrAux_26	071320_EV 0hrAux_27	071320_EV 0hrAux_35	071320_EV 0hrAux_51	071320_EV 0hrAux_55	071320_EV 0hrAux_61	071320_EV 0hrAux_66	071320_EV 0hrAux_68	Distance	Average Value	Standard Error	Std Error Band ASPM-1		Average Value	Standard Error	Std Error Band ASPM-1
	No Auxin	No Auxin	No Auxin	No Auxin	No Auxin	No Auxin	No Auxin	No Auxin	No Auxin	No Auxin	No Auxin	No Auxin	No Auxin	No Auxin	No Auxin	No Auxin	No Auxin	No Auxin	No Auxin	No Auxin	No Auxin	No Auxin	No Auxin	No Auxin	No Auxin	No Auxin	No Auxin	No Auxin	No Auxin	No Auxin	No Auxin	No Auxin	No Auxin	No Auxin	No Auxin	No Auxin	No Auxin	No Auxin	No Auxin	No Auxin	No Auxin	(n=29, n=40)	No Auxin	No Auxin	No Auxin	No Auxin	With Auxin	With Auxin	With Auxin
	Raw Intensity	Raw Intensity	Raw Intensity	Raw Intensity	Raw Intensity	Raw Intensity	Raw Intensity	Raw Intensity	Raw Intensity	Raw Intensity	Raw Intensity	Raw Intensity	Raw Intensity	Raw Intensity	Raw Intensity	Raw Intensity	Raw Intensity	Raw Intensity	Raw Intensity	Raw Intensity	Raw Intensity	Raw Intensity	Raw Intensity	Raw Intensity	Raw Intensity	Raw Intensity	Raw Intensity	Raw Intensity	Raw Intensity	Raw Intensity	Raw Intensity	Raw Intensity	Raw Intensity	Raw Intensity	Raw Intensity	Raw Intensity	Raw Intensity	Raw Intensity	Raw Intensity	Raw Intensity	Raw Intensity	0	2163.05	248.556	2411.61	1914.49	4280.38	574.191	4854.58
0	1575	1222.26	2278.79	1559.49	905.445	4853.01	326.423	1783.52	2018.41	965.54	1979.04	1655.35	1340.92	3380.55	3786.52	3962.86	769.984	1651.62	1518.86	970.051	925.996	1781.19	2376.81	4629.21	516.234	2058.41	2991.7	1380.54	2352.57	5889.33	1219.8	1758.42	1694.75	4467.27	902.846	812.113	2853.09	1290.12	7927.48	2013.95	339.554	0.0648	2210.37	255.978	2466.35	1954.39	4366.91	591.29	4958.2
0.0648	1453.84	1136.55	2255.39	1908.84	923.897	5288.28	300.131	1819.63	2135.48	1043.4	1945.64	1560.01	1423.06	3736.54	3499.41	3755.43	747.438	1703.83	1630.63	925.65	1005.19	1723.18	2485.99	5014.58	537.168	1975.92	3150.89	1363.97	2392.16	5836.67	1374.56	1780.85	1809.65	4753.76	936.114	901.829	2880.31	1126.66	8064.35	1950.11	368.092	0.1296	2234.96	260.474	2495.44	1974.49	4442.12	602.691	5044.81
0.1296	1358.28	1127.35	2125.52	2340.2	978.167	5068.97	344.317	1849.94	2269.34	1087.6	1844.13	1417.95	1467.33	3950.93	3229.19	3511.3	679.724	1773.69	1952.53	898.531	1009.98	1577.56	2503.72	5342.7	508.776	1891.3	3299.42	1392.45	2469.92	5760.7	1465.46	1780.7	1888.09	4972.95	961.587	966.02	2765.35	1067.28	8337.39	2023.39	373.778	0.1944	2271.88	268.636	2540.51	2003.24	4495.71	603.782	5099.49
0.1944	1313.11	1123.61	1954.81	2765.59	1120.28	5219.72	421.049	1840.88	2382.01	1082.85	1710.46	1315.89	1455.03	4015.3	3122.31	3274.35	617.175	1872.76	2410.68	882.314	1044.11	1411.73	2413.3	5698.55	479.511	1914.22	3354.6	1445.11	2490.01	5777.98	1502.63	1790.88	1863.01	5000.56	977.365	978.465	2736.57	1068.45	8654.88	2234.56	410.227	0.2592	2311.56	271.506	2583.06	2040.05	4538.25	600.64	5138.89
0.2592	1360.86	1181.11	1888.95	3100.02	1350.67	4684.18	496.387	1741.85	2345.2	1042.69	1651.04	1264.26	1350.83	3970.41	3225.65	3102.97	727.92	1994.01	2879.68	910.62	1084.63	1391.6	2346.19	6108.87	466.378	1998.55	3190.45	1507.79	2523.26	5916.19	1537.43	1886.88	1870.56	4868.62	1069.28	970.861	2872.39	1008.18	8911.44	2499.63	475.284	0.324	2380.61	276.964	2657.58	2103.65	4596.77	598.529	5195.3
0.324	1430.9	1274.53	2043.55	3307.51	1536.01	5388.2	583.239	1587.87	2213.13	949.945	1663.96	1284.13	1183.13	3814.62	3404.24	3036.47	933.296	2151.82	3181.56	997.63	1132.21	1425.31	2287.62	6443.3	487.96	2021.34	2906.69	1589.82	2554.36	5996.48	1648.32	2006.85	1962.77	4591.2	1197.22	988.61	3139.11	946.559	8982.48	2807.86	523.409	0.3888	2412.8	273.467	2686.27	2139.34	4725.04	601.581	5326.62
0.3888	1464.12	1319.31	2284.37	3401.34	1625.71	5243.07	669.074	1493.04	2125.71	866.783	1725.21	1302.54	1002.57	3671.53	3501.1	3164.59	1132.58	2373.54	3209.82	1022.41	1111.55	1387.55	2276.22	6592.58	539.814	1949.59	2724.92	1682.1	2618.69	5802.18	1888.51	2022.56	2090.5	4282.4	1277.24	1028.13	3439.51	965.501	8965.86	3112.06	569.131	0.4536	2416.16	267.746	2683.91	2148.42	4899.58	607.682	5507.26
0.4536	1490.7	1314.88	2409.55	3445.58	1635.42	5126.39	715.359	1469.1	2104.65	815.377	1847.06	1328.91	832.957	3540.16	3407.4	3332.49	1332.01	2547.88	3014.36	907.234	985.259	1241.81	2270.68	6494.51	579.145	1803.61	2712.63	1764.15	2711.66	5334.5	2288.61	1949.58	2204.28	4021.41	1245.25	1056.1	3759.96	1124.87	8940.94	3330.15	626.173	0.5184	2414.96	260.965	2675.93	2154	5055.48	611.856	5667.34
0.5184	1571.23	1375.74	2409.04	3574.37	1606.18	4983.45	724.827	1467.16	2141.11	823.169	2070.68	1364.79	703.43	3393.72	3154.03	3479.72	1475.33	2615.15	2678.4	816.466	850.904	1132	2243.85	6186.06	602.581	1730.81	2738.34	1820.48	2847.35	4844.39	2826.25	1884.47	2332.75	3819.77	1160.6	1092.6	4039.29	1338.8	8911.53	3504.56	678.089	0.5832	2433.41	258.461	2691.87	2174.95	5172.23	617.901	5790.13
0.5832	1682.88	1556.73	2324.6	3821.46	1537.19	4826.54	712.604	1464.2	2185.83	937.053	2345.95	1345.69	661.342	3377.2	2949.03	3570.8	1611.02	2600.43	2380.16	826.867	763.161	1239.97	2108.38	5837.88	592.069	1716.66	2740.8	1755.07	2885.49	4651.96	3488.65	1853.85	2543.68	3671.8	1024.81	1175.74	4222.9	1355.69	8957.06	3720.97	745.642	0.648	2462.99	261.186	2724.17	2201.8	5286.35	631.014	5917.36
0.648	1866.09	1696.82	2188.26	4117.89	1458.78	4619.05	684.685	1469.18	2120.11	1030.61	2524.41	1328.08	668.456	3514.91	2936.22	3598.02	1766.56	2594.68	2211.85	806.245	717.88	1468.13	1939.34	5654.05	599.76	1712.42	2708.82	1609.43	2707.32	4809.91	4063.66	1868.49	2854.43	3487.28	952.831	1273	4311.03	1205.54	9003.29	4034.34	800.661	0.7128	2507.66	268.4	2776.06	2239.26	5427.19	650.233	6077.43
0.7128	2054.37	1700.1	2111.46	4410.25	1404.68	4456.63	677.704	1554.33	2040.67	1092.35	2517.87	1292.16	726.424	3828.16	3138.73	3590.68	1847.18	2603.57	2208.14	730.505	727.053	1622.18	1801.89	5585.71	637.215	1650.19	2682.43	1484.75	2507.7	5158.81	4226.08	1926.1	3237.98	3306.17	940.528	1344.06	4514.91	1012.89	9072.72	4481.12	907.659	0.7776	2570.96	277.791	2848.75	2293.17	5586.82	668.774	6255.6
0.7776	2180.1	1722.49	2218.76	4647.2	1346.64	4448.6	747.88	1637.4	1916.38	1115.48	2374.33	1321.01	842.406	4059.94	3297.78	3503.61	1881.59	2606.95	2261.48	685.975	867.109	1732.73	1655.46	5609.38	734.842	1543.51	2784.31	1484.26	2398.61	5551.86	4103.56	2034.53	3687	3217.41	904.248	1334.9	4861.44	876.41	9246.64	4890.35	1074.74	0.8424	2647.4	284.592	2931.99	2362.81	5767.64	684.102	6451.74
0.8424	2280.98	1873.72	2353.11	4735.45	1271.78	4604.38	881.927	1625.43	1872.55	1094.17	2218.93	1407.62	1012.92	4177.64	3364.59	3314.94	1946.45	2701.94	2269.22	747.827	1044.67	1821.45	1548.21	5515.62	950.735	1490.7	3025.7	1641.82	2352.9	5882.5	3922.63	2185.08	4042.8	3292.36	838.143	1289.63	5235.83	806.081	9499.98	5100.95	1300.05	0.9072	2716.97	291.94	3008.91	2425.03	5941.81	699.852	6641.66
0.9072	2423.1	2073.93	2357.41	4549.72	1201.78	4902.89	1005.5	1607.74	1935.43	1105.56	2105.25	1416.88	1162.15	4209.28	3447.84	3076.2	1969.27	2912.3	2243.42	821.669	1163.36	1896.26	1411.14	5450.58	1211.76	1513.04	3255.94	1866.7	2307.9	6164.29	3802.07	2348.38	4107.22	3495.39	780.295	1253.37	5507.49	789.355	9955.93	5054.6	1533.37	0.972	2768.3	303.896	3072.2	2464.41	6110.94	717.593	6828.54
0.972	2573.29	2282.15	2196.28	4127.04	1154.98	5327.7	1050.88	1610.96	1973.35	1071.73	2004.02	1410.63	1264.16	4166.49	3429.08	2870.67	1973.06	3208.02	2163.3	835.61	1267.02	1896.28	1290.12	5535.6	1463.99	1486.99	3453.63	2124.83	2255.23	6374.04	3824.81	2489.49	3809.59	3750.77	758.388	1254.2	5729.61	725.316	10593.9	4978.23	1744.88	1.0368	2816.17	320.687	3136.85	2495.48	6249.3	730.366	6979.67
1.0368	2748.09	2602.01	2024.06	3702.3	1157.18	5709.82	1057.5	1578.83	1941.18	1051.16	1883.15	1390.09	1388.33	4075.44	3247.03	2830.87	2009	3550.82	2083.09	801.24	1308.95	1867.62	1249.36	5699.59	1603.15	1368.35	3680.16	2269.05	2183.31	6529.77	3989.48	2526.07	3347.42	3902.16	731.155	1311.82	6024.01	644.094	11304.4	5072.22	2019.48	1.1016	2879.34	340.718	3220.06	2538.62	6385.12	737.767	7122.89
1.1016	2974.97	3057.59	1987.1	3432.21	1204.04	5873.13	1092.55	1585.54	1844.7	1068.42	1758.12	1374.78	1417.99	3974.19	3045.07	3009.68	1993.47	3868.59	2049.76	816.922	1261.48	1841.65	1189.81	5951.28	1557.03	1258.42	3873.72	2274.52	2158.35	6737.08	4213.13	2480.18	3043.63	3907.51	729.411	1370.48	6411.91	674.627	12047.2	5312.69	2330.03	1.1664	2953.57	359.129	3312.7	2594.44	6542.81	746.619	7289.43
1.1664	3224.95	3691.62	2017.87	3283.3	1262.16	5705.91	1147	1586.25	1712.23	1127.55	1709.77	1436.26	1409.46	3931.09	2837.56	3244.06	1934.78	4146.82	2179.45	843.331	1262.61	1778.16	1072.79	6129.86	1458.29	1292.12	4012.95	2300.32	2249.55	7040.05	4391.67	2502.14	2841.34	3757.39	769.565	1418.08	6874.32	795.735	12795	5391.18	2531.94	1.2312	3048.99	375.686	3424.68	2673.3	6725.38	763.104	7488.48
1.2312	3459.36	4689.64	1981.65	3214.25	1314.98	5355.7	1185.37	1561.39	1548.88	1237.41	1802.68	1591.6	1444.87	4027.84	2694.68	3450.72	1891.78	4344.05	2510.73	854.212	1361.52	1805.92	978.317	6112.15	1405.86	1370.15	4005.65	2423.09	2441.92	7441.12	4708.24	2618.24	2587.24	3577.1	831.641	1489.08	7342.58	944.164	13481	5301.33	2620.43	1.296	3172.73	397.613	3570.34	2775.12	6912.48	782.503	7694.99
1.296	3776.93	6080.06	1937.86	3129.81	1402.6	5007.73	1209.54	1562.59	1339.89	1347.27	1995.7	1752.32	1435.17	4133.65	2645.27	3584.36	1792.86	4657.38	2942.22	850.757	1503.83	1894.48	983.836	6035.05	1304.36	1441.44	3901.06	2606.78	2695.22	7781.41	5345.2	2753.29	2415.98	3441.43	878.015	1549.27	7909.19	1012.99	14153.1	5256.22	2635.87	1.3608	3330.13	427.857	3757.98	2902.27	7105.82	801.827	7907.65
1.3608	4164.4	7885.3	2080.41	2931.53	1452.63	4768.46	1197.88	1658.4	1170.54	1438.09	2191.86	1901.88	1411.69	4189.94	2721.46	3631.68	1696.65	5206.81	3498.89	868.498	1639.06	1931.94	1009.49	5901.95	1183.46	1552.03	3857.59	2799.64	2913.11	8017.7	6117.24	2900.66	2403.45	3256.18	947.819	1619.81	8534.1	988.284	14888	5348.06	2658.61	1.4256	3514.86	465.438	3980.29	3049.42	7333.96	823.951	8157.91
1.4256	4558.42	10081.7	2410.63	2616.74	1466.38	4707.27	1164.8	1806.68	997.42	1437.47	2304.03	2051.82	1349.71	4369.42	2803.47	3635.1	1721.41	6109.42	4222.92	992.296	1668.37	1908.28	967.802	5772.41	1142.82	1723.71	3954.07	2966.64	3042.46	8415.35	6690.48	2925.93	2586.44	3022.26	1040.56	1699.95	9062.45	950.28	15526.7	5442.76	2792.29	1.4904	3704.85	507.709	4212.56	3197.14	7546.76	845.171	8391.94
1.4904	5087.26	12492.9	2765.08	2282.57	1502.56	4897.87	1108.16	1921.77	813.815	1368.65	2340.35	2142.41	1211.48	4744.15	2922.01	3544.54	1805.26	7369.03	5200.61	1065.34	1589.28	1842.02	870.012	5425.53	1264.55	1986	4082.33	3142.91	3010.84	9098.76	6795.02	2803.84	2990.34	2836.5	1072.72	1817.51	9396.62	921.151	15889.9	5465.67	3011.62	1.5552	3901.43	554.655	4456.09	3346.78	7714.23	858.79	8573.02
1.5552	5806.76	14840.8	3000.26	2008.78	1633.38	5311.18	1055.94	2048.28	655.784	1284.55	2360.1	2183.07	1092.46	5270.23	2969.91	3283.39	1836.88	8872.33	6241.33	1103.68	1473.76	1816.23	739.109	4890.08	1476.88	2282.07	4329.97	3425.2	2854.71	10164.4	6589.79	2668.39	3473.57	2738.65	1073.59	1999.13	9452.26	904.849	16013.4	5571.53	3162.12	1.62	4143.45	606.479	4749.93	3536.97	7877.92	868.734	8746.65
1.62	6822.63	16735.6	3178.72	1822.02	1840.1	5835.36	1074.59	2040.21	554.367	1224.19	2423.11	2303.51	1005.74	5614.77	3020.2	3102.52	1880.51	10483.3	7280.06	1215.16	1366.69	1903.13	641.471	4385.33	1759.12	2696.13	4743.83	3923.85	2721.02	11732.7	6531.89	2506.77	3897	2652.09	1135.87	2235.31	9531.48	881.483	16116.1	5907.36	3156.09	1.6848	4434.76	660.297	5095.06	3774.47	8071.19	884.129	8955.32
1.6848	7918.15	18102	3406.28	1714.68	2165.67	6225.28	1146.16	1811.5	647.573	1281.11	2528.59	2405.71	976.099	5677.08	3081.23	3115.34	2005.95	12181.4	8433.65	1321.06	1283.24	2036.25	622.85	4087.89	2107.79	3198.78	5264.18	4637.3	2630.59	13690.9	6692.04	2441.87	4188.01	2563.72	1228.42	2493.68	9788.69	897.026	16285.3	6417.34	3124.88	1.7496	4753.45	713.227	5466.68	4040.22	8317.66	908.449	9226.11
1.7496	8732.41	19159	3810.44	1623.03	2683.01	6332.91	1182.84	1503.95	990.108	1415.87	2729.47	2384.74	927.242	5622.07	3085.07	3189.23	2077.83	14014.8	9768.64	1405.26	1232.31	2155.75	667.227	4158.1	2350.78	3865.75	5901.97	5514.14	2588.15	15581.3	6962.65	2402.55	4257.49	2537.64	1371.51	2742.19	10287.4	1085.14	16444.2	6890.96	3256.33	1.8144	5092.13	764.57	5856.7	4327.56	8579.63	923.584	9503.22
1.8144	9343.4	20064.2	4456.41	1545.23	3468.01	6252.33	1140.18	1217.84	1527.02	1621.34	2999.97	2291.65	840.969	5499.66	3070.53	3220.34	2001.39	15869.3	11316.5	1617.05	1236.53	2278.33	779.172	4481.6	2420.95	4822.16	6681.56	6380.33	2634.04	17206	7274.89	2260.17	4238.82	2526.1	1525.21	2925.56	10944.1	1448.66	16577.7	7184.79	3587.55	1.8792	5471.41	816.672	6288.08	4654.73	8846.77	923.256	9770.02
1.8792	10129	20850.9	5297.21	1519.98	4646.93	6178.98	1066.69	1035.24	2245.54	1774.33	3426.67	2152.66	748.838	5414.58	3002.08	3174.92	1926.42	17615.4	13054.9	1976.01	1322.93	2401.46	925.674	4781.35	2572.39	6085.48	7741.21	7214.88	2748.81	18854.1	7575.5	2124.21	4421.89	2497.31	1622.55	3100.49	11579.3	1701.04	16561.4	7230.51	4027.82	1.944	5926.17	875.005	6801.17	5051.16	9132.85	914.795	10047.6
1.944	11272.6	21613.6	6363.75	1604.88	6085.82	6358.13	1003.3	953.08	3287.12	1971.61	4129.7	1997.28	766.445	5281.47	2981.38	3143.99	1897.67	19237.9	14856.9	2367.85	1421.33	2519.18	1035.68	5010.59	2942.1	7527.48	8907.31	8169.92	2900.19	20948.2	7808.35	2053.89	5099.49	2515.82	1575.47	3429.53	12068	1737.28	16446.8	7164.89	4517.03	2.0088	6480.81	940.443	7421.25	5540.37	9435	907.248	10342.2
2.0088	12681.4	22336.6	7901.48	1807.07	7743.14	6812.18	1019.79	934.684	4653.13	2365.71	5306.2	1921.58	912.656	5145.14	2985.19	3157.36	1875.93	20719.4	16760.9	2682.89	1611.09	2492.31	1128.52	5240.65	3564.47	8914.49	9928.47	9290.69	3061.24	23558.8	8196.85	2053.64	6246.65	2665.1	1507.8	3988.12	12396.6	1731.7	16302.7	7073.32	5037.46	2.0736	7150.93	1013.93	8164.86	6136.99	9747.21	905.532	10652.7
2.0736	14273.7	23087.5	10106.4	2056.97	9670.02	7394.73	1106.34	1116.11	6266.17	3184.66	7176.5	1948.76	1158.72	5095.83	3008.78	3230.92	1948.9	21975.8	18816.9	2821.32	1883.32	2323.4	1272.05	5374.72	4347.8	10014.5	10768.8	10555.5	3236.03	26566.6	8985.42	2117.2	7565.78	2923.68	1486.1	4813.86	12675.8	1790.89	16199.9	7147.42	5694.18	2.1384	7926.61	1089.55	9016.16	6837.06	10059.7	911.261	10970.9
2.1384	16011.7	23983	12980.9	2345.53	11902.3	8131.73	1207.06	1531.63	8032.65	4648.93	10060.8	2024.03	1477.42	5146.13	3047.22	3383.97	2081.55	22801.5	20976.5	2906.23	2095.79	2120.3	1441.72	5367.06	5366.78	10831	11565.4	12005	3434.13	29225.8	10057.8	2256.53	8631.27	3190.97	1566.26	5740.49	13010.2	2046.02	16180.2	7565.71	6611.95	2.2032	8795.15	1162.38	9957.53	7632.77	10410.3	921.799	11332.1
2.2032	17557.9	25028.8	16575.1	2774.14	14560.2	9140.6	1288.2	2330.82	9700.62	6865.54	14185.9	2045.44	1641.78	5395.06	3059.66	3700.54	2243.21	23134.4	23125.3	3038.24	2322.2	2035.86	1720.38	5206.89	6709.85	11379.9	12553.8	13632.7	3661.91	30831.7	11476.8	2480.04	9214.57	3568.23	1796.02	6407.19	13471.5	2437.01	16245.3	8352.82	7705	2.268	9748.05	1237.14	10985.2	8510.91	10794.4	934.526	11729
2.268	18549.8	25917.5	21015	3487.5	17692.7	10552.4	1354.45	3594.36	11193.3	9908.01	19224	2026.5	1673.54	5943.35	3030.88	4269.76	2381.34	23018.4	25109.3	3264.77	2753.38	2008.11	2261.68	4953.77	8444.4	11930.7	13787.6	15297.7	3884.3	31414.1	13371.7	2737.52	9732.57	4023.58	2232.37	6669.44	13983.1	2691.33	16295.6	9315.54	8674.55	2.3328	10791	1325.92	12116.9	9465.09	11204.2	950.983	12155.2
2.3328	18858.6	26339.1	26358.7	4671.79	21068.6	12416	1425.05	5285.87	12642.9	13664.6	24356.6	2133.05	1953.64	6590.52	2892.48	5071.31	2557.67	22555.1	27037.6	3806.29	3434.46	1900.04	2974.71	4611.18	10584.8	12553.7	15277.7	16735	4070.06	31891	15756.5	2995.02	10657.4	4543.15	2842.1	6823.87	14366.7	2933.26	16102	10336.5	9356.82	2.3976	11944.7	1429.85	13374.6	10514.9	11687.6	976.201	12663.8
2.3976	18863	26090.2	32476.4	6470.25	24170.1	14843.1	1507.22	7245.83	14230.8	18101.8	28565.5	2502.25	2480.57	7456.89	2775.89	6072.05	2755.28	21819.9	29004	4907.39	4310.02	1881.05	3722.17	4332.74	13019.7	13301.7	17027.2	17880.5	4306.23	33000.4	18538.4	3289.41	12074	5098.61	3703.87	7156.95	14509.3	3382.03	15591.8	11537.7	9731.89	2.4624	13199.3	1546.23	14745.5	11653	12231.1	1009.42	13240.5
2.4624	18845.7	25404.4	39187.6	8898.49	26729.1	17857.3	1579.15	9297.45	16005.1	23082.4	31502.2	3098.98	3459.37	8553.86	2735.8	7249.74	2957.28	20971.5	30977.7	6575.32	5262.53	1957.94	4453.37	4255.92	15771.6	14241.7	18958	18615	4534.46	34434.1	21590.9	3483.05	13752.5	5748.35	4858.61	7784.52	14507.5	3899.17	14861.5	13118.8	10111.3	2.5272	14527.6	1674.96	16202.6	12852.7	12784.1	1043.75	13827.9
2.5272	18794.2	24430	46353.4	12096.7	28898.1	21233.1	1624.37	11224.8	17969.9	28567.9	33434.4	4064.3	5097.81	9489.07	2728.39	8441.11	3193.12	20023.6	32777	8704.69	6203.65	1937.49	5141.98	4386.83	19177.5	15421.3	20676.6	18980.9	4781.84	35703.6	24512	3634.2	15611.4	6649.23	6280.49	8681.11	14578.3	4308.66	14295.7	14796.6	10727.9	2.592	15962	1820.63	17782.6	14141.4	13284	1076.33	14360.3
2.592	18753.2	23387.4	53648.6	16235.9	30542.3	24981.4	1712.36	13435	20214.6	34056.1	35139.3	5431.01	7230.67	10158.8	2804.17	9520.77	3651.9	19160.6	34273.7	11404.8	7154.06	1927.82	5787.94	4600.4	23199.2	16838.7	22071.8	19184.9	5118.29	37088.1	27598.2	3814.19	17619.6	7835.5	7774.59	9669.27	14854.8	4666.46	14067.2	16345.3	11482.9	2.6568	17475.7	1969.58	19445.3	15506.1	13681.1	1104.69	14785.8
2.6568	18625.2	22523.1	60225.2	21492.7	31648.7	29214.2	2017.14	16501.1	22637.2	38713.4	37083.7	7172.15	9796.12	10585.2	3057.79	10281.5	4579.98	18348.5	35441.9	14575.5	7954.57	2063.56	6541.13	4857.77	27480.7	18276.2	23309.5	19274.6	5628.36	38539.7	31163.9	4061.83	19602.7	9275.26	9212.27	10533.9	15343.4	5156.68	14023.3	17450.4	12234.3	2.7216	18978.3	2105.99	21084.3	16872.4	13992.6	1132.14	15124.8
2.7216	18208.1	21779	65103.7	27720.7	32517.2	33705.4	2599.88	20595.8	25004.9	42332.4	39110.6	9336.82	12813.1	10888.9	3646.85	10693.9	5956.34	17581.7	36246.7	17893.4	8476.47	2366.09	7307.32	5062.79	31176.3	19626.9	24916.4	19198	6168.61	40036.5	35209	4338.25	21163.6	10708.7	10496.3	11023.6	15768.4	5949.5	13974.1	18092.7	13317.3	2.7864	20334	2208.63	22542.6	18125.3	14255.7	1164.48	15420.2
2.7864	17551.3	21034.3	67943.4	34172.2	33371.4	37901.2	3303.24	24919.8	27082.4	44467.3	40584.4	12189.8	15852.9	11460.7	4571.77	11187.6	7815.8	16840	36698.8	21246.5	8718.98	2809.44	7946.59	5253.44	33772.8	20702	27352.9	18924	6648.08	41024	39131.5	4718.3	21747.3	11756	11670.2	11152.2	15819.8	7247.94	13768.7	18551.8	14781.5	2.8512	21433.9	2263.76	23697.7	19170.1	14487.5	1209.52	15697
2.8512	16888.1	20318.4	68831.9	39868.6	33847.6	41665.2	3926.34	28333.1	28584	45058.3	41067	16061.5	18274.9	12466.7	5921.7	11814.8	10205.7	16059.5	36905.4	24767	8803.52	3414.4	8396.26	5475.1	35466.4	21399.9	30257	18417.9	7120.96	40923	42331.8	5171.9	21556	12272.5	12700.2	11229	15517.3	9375.6	13222.1	18710.1	16163	2.916	22299.6	2278.15	24577.7	20021.4	14703.2	1263.59	15966.7
2.916	16157.3	19499.2	68431.9	44510.3	33695.1	45098	4386.92	30640.2	29038.2	44215.3	40779.8	20911.8	20586.6	13995	7996.1	12501.2	13047.9	15161.6	36566.1	28240.7	8783.49	4212.65	8652.85	5973.16	36485.1	21696.7	32629.3	17742.2	7684.54	40199.8	44792.9	5639.75	21078.3	12343.4	13457	11390.8	15101.8	12452	12724.6	18614.8	17167.9	2.9808	23005.9	2269.79	25275.7	20736.2	14920.1	1311.03	16231.2
2.9808	15410.6	18539.7	67309.9	47944.8	32650.9	48375.6	4771.93	32120.1	28254.7	42670.9	39906.5	26115.5	23296.4	15975	10992.1	13219.9	16397.6	14136.2	35521.7	32054.7	8651.68	5122.28	8872.06	6799.29	36633.8	21598.5	33862.1	16947.7	8359.34	39474.7	46881.3	6346.7	20899.4	12273.7	13678.2	11575.5	14736.4	16278	12494.5	18286.1	17807.9	3.0456	23630.6	2263.28	25893.9	21367.3	15153.2	1345.91	16499.1
3.0456	14736.7	17565.5	65500	50477	30741.4	51586.1	5292.09	33415.5	26876.7	41112.6	38627.5	30901.1	26692.9	17846.3	14736.3	13866.7	20064	13066.4	34131.5	35745.7	8539.79	6064.1	8943.9	7897.19	35832.4	21403.6	34652.8	16084.3	9044.1	38687.2	49217.4	7369.23	21062.5	12354.1	13420.4	11586.3	14355	20648.9	12410.6	17964.2	18335.8	3.1104	24175.6	2267.55	26443.2	21908.1	15363.1	1358.55	16721.7
3.1104	14241.5	16647.8	63358	52423.4	28578	54124.1	5930.86	34647.2	25726.8	39471.2	37101.6	35013.8	30211.6	19492.4	18696.5	14432.8	23740.6	12157.5	32946	38590.6	8542.55	7130.9	8806.55	9337.15	34273.6	21370.2	35291	15189.3	9604.55	37504.3	51809.3	8629.39	21393.2	12485.5	13185.3	11354.6	13819.7	25226.6	12358.1	17346.5	19009.9	3.1752	24559.2	2273.56	26832.7	22285.6	15503.9	1350.05	16854
3.1752	13707.2	15853.3	61249.9	53426	26431.3	55413.7	6535.55	35701.1	25343.6	37891.8	35336.9	38624.3	33328.4	20814.6	21989.6	14772.2	27346.6	11400.6	32289.3	40102.7	8664.46	8210.53	8447.69	11398.3	32524.9	21367.1	35097.6	14243.8	9884.66	35977.2	53983.3	9997.73	21528.7	12410.2	13321.1	10878.6	13272.1	29678.4	12243	16389.3	19848.8	3.24	24705.6	2266.55	26972.1	22439	15568	1337.57	16905.5
3.24	12796.5	15131.4	58974.6	53161.9	24530.3	55310.4	6952.75	36268.7	25493	36101.8	33613.4	41948.1	36090.3	21829.3	24191.7	14694.6	30762.6	10715.2	31889.8	40590	8760.07	9457.11	7920.02	14056	30744.7	21236.1	33683.3	13318.8	10082.5	34491	55208.1	11659.8	21332.6	12009.4	13599.2	10263.9	12679.9	33430.5	12157.4	15272.2	20519.1	3.3048	24639	2241.07	26880	22397.9	15614.9	1345.18	16960.1
3.3048	11676.1	14473.2	56297.3	52053.6	22833	54308.1	7060.09	36263.5	25843.2	33963.3	31920	44726.7	38183.8	22569.3	25307.8	14293.5	33687.2	10051.1	31626.6	40519	8882.08	10910.3	7378.94	17220	28956.8	21030.3	31475.8	12410.6	10455.1	33469.6	55164.3	13936.4	21123.1	11422.1	13473.3	9544.98	12039.1	36206.5	12129.3	14593.7	20718.9	3.3696	24424.9	2197.33	26622.2	22227.6	15671.1	1379.73	17050.8
3.3696	10645.7	13833	53398.7	50440.6	21223.3	52927	6946.35	35902.4	26047.6	31658	30067.4	46050.7	39649.3	23410.7	25651.3	14001.1	35794.1	9497.47	31493.3	40273.2	8803.35	12351.1	7091.66	20598.8	27302.2	20882.1	29327.9	11617.8	10973.6	32618.3	53950.6	17025.8	20933.9	10764.5	12875.8	8746.71	11525.3	38166.4	12053.5	14488.2	20412.7	3.4344	24061.8	2126.25	26188	21935.6	15733.1	1433.04	17166.2
3.4344	9957.92	13150.4	50441.1	48251	19571	51110.6	6711.21	35244.6	25910.6	29571.2	28020.6	45276.7	40773.4	24579.5	25414.9	14033.6	36831.8	9072.65	31430.2	39957.4	8470.83	13644.7	7056.74	24180.1	25913.4	20668.5	27420.1	10958.4	11415.5	31722.3	51526.9	20750.9	20524.8	10067.7	11971.1	8108.53	11303.1	38821	11853.6	14990.6	19854.7	3.4992	23551.9	2036.02	25587.9	21515.8	15774.4	1489.53	17264
3.4992	9611.42	12520.2	47573.2	45413.6	18027.6	49122.9	6513.73	34523	25246.9	27646.8	26017.9	42973.4	41639.4	25808.4	24877.8	14105.4	36585.8	8617.43	31384.2	39357.1	7990.04	14699.5	7078.77	28116.4	24879.4	20175.2	25621.1	10461	11671.9	30403.1	47973.5	25044.6	19767.1	9399.93	11104.3	7714.49	11338.2	38302.8	11527.4	15610.4	19181.1	3.564	22917.4	1954.37	24871.8	20963.1	15767.7	1536.01	17303.7
3.564	9407.9	11996.5	44996.9	42136.6	16772.1	47118.1	6464.76	33423.4	24060.8	25327.2	24138.2	40244.7	42378.2	26990.1	24347.2	13817.8	35527.2	8107.46	31084.2	38243.2	7439.03	15194.9	6949.02	32333.7	23884.1	19332.3	24076.2	10057.5	11591.1	28805.6	43864.6	29817.5	18708.6	8795.68	10479.4	7464.59	11481.5	37376.1	11160.5	15863.8	18356.2	3.6288	22207.3	1903.78	24111.1	20303.6	15724.7	1577.03	17301.7
3.6288	9288.32	11572.9	42600.4	39023.7	15751.4	45024.1	6583.83	31808.4	22378.8	22793.6	22409.5	37984.6	43190	28016	23684.4	12955.9	33743.4	7665.22	30388.2	36937.6	6884.55	15085.3	6540.23	36202.3	22873.9	18228.2	22643.7	9616.86	11094	27213	40183.8	34995	17592.1	8340.81	10094.2	7196.85	11703.6	36292.2	10788.5	15629.6	17501.8	3.6936	21479.6	1885.99	23365.6	19593.6	15680.4	1614.98	17295.4
3.6936	9101.07	11315	40146.1	36422.9	14855.9	42679.2	6780.14	29593.2	20412.4	20424.9	20763.9	36378.6	44409.1	28833.7	22267.4	11875.8	31569.4	7342.21	29281.6	35906.5	6473.99	14515.6	6046	38858.9	21987.8	16986.2	21157.1	9095.63	10500.3	25930.4	37370.9	40451.4	16637.5	8025.63	9733.8	6763.95	11975	35263.7	10468.1	15242.3	16821.4	3.7584	20745.3	1887.44	22632.7	18857.8	15670.8	1648.39	17319.2
3.7584	8726.48	11206.7	37833.8	33838.4	13992	40289.1	6902.92	27184	18372.1	18595.4	19083.4	34879.6	45332.8	29366.7	20309.3	10995	29228.3	7072.25	27987.6	35360	6289.72	13789.1	5598.96	40219.8	21279.6	15934.9	19560.9	8520.72	10073.4	25029.2	35627.5	45740.2	15840.6	7818.2	9247.5	6202.73	12026.2	33968.6	10189.6	15003.5	16040	3.8232	20039.5	1896.31	21935.8	18143.2	15725	1669.81	17394.9
3.8232	8304.77	11211.1	36038.7	30881	13163.2	38424.9	6934.18	24934.7	16494.5	17603.7	17372	32941.6	45497.8	29576.6	18243.2	10612.1	26798	6807.01	26704.8	35280.1	6102.57	13282.1	5176.3	40861.7	20740.2	15146	18003.4	8095.28	9773.12	24376.2	34688.7	50308.4	15249.8	7575.21	8655.35	5662.66	11657.9	32292.5	9931.17	14881.3	15335	3.888	19342.2	1893.62	21235.8	17448.6	15766.6	1678.51	17445.1
3.888	7956.49	11209.2	34752.4	27747.8	12447.7	37126.4	6857.14	22615.2	14932	17031.2	15853.8	30682.3	44130.6	29528.7	16353.6	10610	24396.7	6568.37	25472.2	34969.8	5764.53	13196.6	4753	41245.1	20263.6	14610.1	16706.4	7872.24	9476.29	23829.7	34182.8	53631.7	14787.7	7256.96	8064.08	5225.02	10965.7	30429.8	9858.83	14827.8	14841.9	3.9528	18624.9	1870.25	20495.1	16754.6	15718.6	1687.35	17406
3.9528	7765.54	11033.9	33682.7	24960.5	11854.4	35896.6	6751.29	20413.5	13631.9	16505.9	14650.7	28541.7	41270	29156.5	14821.3	10746.5	22078.9	6432.93	24264.6	33933.4	5388.65	13513.6	4268.04	41086.9	19874	14141.1	15784.9	7730.22	9152.95	23259.5	33880.2	55855.1	14275.3	6819.24	7585.53	4918.64	10228	28457.2	9872.99	14575.7	14559.6	4.0176	17848.7	1819.91	19668.6	16028.8	15574.9	1701.93	17276.9
4.0176	7776.37	10631.9	32669.2	22830.5	11278.4	34390.5	6660.06	18666.1	12586.9	15646.9	13629.1	26963.5	36878.9	28264.8	13433	10817.6	20003.4	6450.43	23140.2	32465.9	5137.94	14068.9	3707.72	39846.6	19453.3	13753.7	15175.9	7435.71	8971.84	22477.3	33585.2	56934.4	13530.4	6372.31	7191.6	4602.53	9737.01	26498	9818.42	14060.6	14254.5	4.0824	17045.6	1753.6	18799.2	15292	15388.7	1718.28	17107
4.0824	7990.76	10157.5	31917.4	21379.2	10712.1	32637.9	6555.16	17444.4	11826.7	14301.2	12760.4	25815.9	31946.3	26921.8	12352.4	10645.3	18362.6	6461.82	22095.3	31005.7	4886.96	14625.5	3251.67	37497.6	18897.4	13636.2	14702.6	6947.07	9022.57	21365.1	33419.4	57008.9	12599.3	6036.52	6806.42	4262.81	9466.87	24475.8	9769.92	13368	13532.4	4.1472	16286.4	1685.73	17972.1	14600.6	15203.7	1728.22	16931.9
4.1472	8193.19	9817.36	31559.8	20511.4	10216.6	31023.5	6528.44	16447.1	11379	12700.9	12082.2	24642.8	27689.7	25284	11612.6	10227	16981	6367.22	21161.3	29940.2	4615.29	14996.8	2951.8	34619.3	18346.7	13761	14195.3	6411.67	9099.38	20211.9	33345.9	56191.7	11748.8	5810.37	6341.44	4008.24	9430.09	22401.2	9748.39	12674.3	12466.3	4.212	15601.4	1624.22	17225.6	13977.1	15010.5	1726.56	16737.1
4.212	8272.22	9596.22	31302	19793.4	9792.43	29865.9	6625.31	15368.3	11013.3	11069.5	11569	23358.5	24811.3	23762.2	11111.9	9705.9	15584.7	6230.94	20279.4	28988.8	4298.51	15072.2	2682.43	31999.1	17822.5	13815.4	13693.9	6011.94	9137.89	19180.5	33090	54793.7	11100.6	5700.89	5873.16	3870.96	9467.45	20641.5	9697.27	12133.1	11471.5	4.2768	14970.6	1559.29	16529.8	13411.3	14824.5	1723.45	16548
4.2768	8317.4	9523.44	30716.9	18781.5	9499.92	28855.7	6684.95	13981.2	10550.5	9713.99	10975	21813.4	23690.6	22418.1	10914.1	9499.19	14144.1	6123.76	19339	28075.6	4080.93	14782.5	2365.55	29932.5	17141	13542.6	13197.8	5773.45	9061.63	18396.2	32322.3	52840.2	10742.2	5716.99	5554.23	3737.29	9408.61	19281.2	9626.9	11847.8	10822.9	4.3416	14332.6	1487.59	15820.1	12845	14659.5	1731.38	16390.9
4.3416	8274.06	9529.99	29889	17338.3	9241.76	27878.6	6380.24	12264.7	9960.35	8836.59	10287.1	20049.1	23625.2	21383.8	10876.9	9802.67	12714	5944.13	18306.7	26771.3	3935.14	14033.5	2076.26	28217.4	16310.5	13022.7	12651.9	5702.38	8854.18	17903.9	31012.1	50507	10571.8	5699.84	5412.44	3604.97	9238.67	17928.3	9603.32	11523.8	10469.9	4.4064	13701.3	1415.77	15117.1	12285.6	14496.9	1741.88	16238.8
4.4064	8255.92	9485.64	29159.8	15594.8	8924.03	26791.7	5722.45	10546.7	9324.57	8353.72	9578.53	18534.1	23488.4	20448.6	10954.7	10437	11400.2	5712.87	17255.9	25255.1	3781.04	12926	1811.28	26795.7	15799.3	12495.6	12202.4	5728.97	8606.31	17676.2	29454.4	48026.6	10503.9	5693.09	5322.02	3477.81	8967.6	16422.4	9608.01	10972.8	10258.7	4.4712	13099.1	1350.59	14449.6	11748.5	14343.7	1751.36	16095.1
4.4712	8241.33	9358.31	28688.1	13841.7	8495.59	25564.8	5091.98	9030.01	8678.99	7952.41	8948.41	17431.4	22860	19710.8	11076	11025.4	10279.9	5515.46	16391.9	23629.5	3609.8	11743.3	1576.8	25694.4	15806	12037.2	11734.8	5718.52	8330.13	17445.4	28127.3	45476.8	10496.7	5779.83	5157.56	3297.4	8642.57	14797.3	9600.53	10161.7	10015.2	4.536	12533.8	1292.07	13825.8	11241.7	14233	1758.61	15991.6
4.536	8204.15	9188.18	28453.9	12301.1	8064.87	24230.1	4791.01	7802.88	8132.22	7313.22	8291.58	16612.2	21797.6	19356.5	11088.8	11424.2	9412.41	5372.86	15800.2	22063.6	3433.87	10681.9	1405.77	24818	16027.4	11576.4	11296.2	5631.84	8038.08	16864.7	26904.5	42966.2	10243.3	6009.06	4792.44	3120.33	8382.8	13335.2	9611.73	9330.97	9711.57	4.6008	12007.1	1233.58	13240.7	10773.5	14174.8	1762.25	15937
4.6008	8216.79	9015.53	28285	11073.7	7757.71	22827.5	4784.42	6912.71	7766.26	6548.89	7537.41	15786.6	20683.2	19100.9	11167	11527.3	8853.37	5182.22	15349.7	20780.9	3183.73	9765.39	1239.9	23870.9	16102	11159.9	10913.5	5459.07	7769.85	15745.8	25847.5	40301.3	9714.92	6248.45	4324.04	3016.72	8296.57	12334.9	9616.72	8851.94	9370.37	4.6656	11497	1177.18	12674.2	10319.8	14112.1	1749.61	15861.7
4.6656	8251.32	8676.77	27960.2	10124.9	7506.68	21425.2	4848.19	6253.42	7477.88	5905.38	6736.69	14620.3	19722.6	18690.2	11167.2	11334.2	8463.47	4841.59	14856.5	19889.4	2862.29	8956.56	1167.26	22833.9	15707.5	10854.3	10680	5215.35	7557.22	14428.7	24950.3	37766.4	9175.98	6188.56	3934.03	2978.04	8405.33	11668.3	9666.33	8633.1	8996.11	4.7304	11029	1126.08	12155.1	9902.93	14007.9	1717.4	15725.3
4.7304	8376.95	8255.39	27411.9	9336.32	7282.92	19995.8	4813.28	5630.46	7235.43	5489.39	6070.75	13305.8	19030.4	17944.1	10974.7	11006	8125.01	4479.32	14225	19446.5	2639.67	8451.65	1098.44	21901.6	15206	10801.3	10579.2	4987.84	7323.11	13307.8	24294.4	35487.8	8798.24	5834.78	3730.24	2949.66	8455.64	11092.1	9698.62	8501.15	8614.64	4.7952	10603.9	1086.25	11690.2	9517.69	13841.5	1666.98	15508.5
4.7952	8604.69	7920.07	26559.6	8558.89	6982.94	18466	4589.04	5031.91	6865.61	5205.16	5593.81	12280.4	18368.5	17134.1	10554.1	10704.2	7818.13	4213.96	13631.2	19314.5	2497.78	8223.23	1019.62	21495.6	15017.9	10842.9	10441.9	4729.45	6943.75	12455.9	23910.1	33556.5	8551	5304.55	3625.5	2888.33	8241.62	10624.4	9608.2	8211.86	8174.7	4.86	10210.7	1054.89	11265.5	9155.77	13631.8	1610.4	15242.2
4.86	8828.84	7713.75	25563.7	7737.53	6641.78	16861.5	4267.71	4508.81	6443.25	5004.81	5183.99	11511.9	17290.7	16345	10050.4	10613.8	7587.86	4015.17	13112.1	19468.3	2305.28	8199.12	958.339	21720.5	15068.9	10866.5	10203	4443.03	6460.74	11727.2	23625.1	31801.7	8455.17	4843.02	3571.21	2811.72	7714.45	10316.9	9377.55	7802.2	7614.23	4.9248	9844.02	1026.93	10871	8817.08	13446.5	1567.2	15013.7
4.9248	9117.29	7539.12	24660.6	6894.4	6219.79	15403.7	3983.87	4145.9	6116.19	4731.63	4845.75	10850	16126.5	15847.4	9702.15	10782	7256.7	3848.27	12698.2	19431.3	2054.94	8198.31	922.013	22207	15098.9	10739.2	9801.86	4105.82	6103.94	11190.7	23169.9	29979	8351.47	4534.71	3534.98	2703	7137.82	10130.4	9078.11	7412.29	6949.67	4.9896	9496.18	999.374	10495.5	8496.8	13295.1	1539.11	14834.2
4.9896	8571.86	7466.93	24193.2	6118.68	5699.93	14197.9	3781.99	3920.74	5814.08	4417.14	4620.39	10323.8	15030.2	15871.2	9657.59	11067.1	6823.84	3710.99	12418.3	18814.7	1834.07	8313.12	905.551	22204.4	14978.5	10588.9	9446.21	3741.67	6006.27	10674.5	22503.6	28250.1	8152.45	4293.69	3462.69	2560.03	6732.52	9950.15	8808.01	7068.42	6347.8	5.0544	9195.2	975.301	10170.5	8219.9	13200.2	1531.33	14731.5
5.0544	8089.64	7580.73	24256.3	5531.77	5130.75	13198.3	3642.34	3668.5	5499.3	4153.76	4470.81	9978.58	14108	16192.5	9911.85	11296.3	6403.98	3566.62	12285.4	17761.1	1664.67	8516.13	830.562	21550.4	15059	10420.1	9104.3	3457.62	6027.08	10040.2	21699.7	26819.5	7776.61	4082.25	3369.72	2400.78	6457.98	9756.74	8572.78	6788.15	5882.54	5.1192	8970.86	963.363	9934.22	8007.49	13138.3	1535.75	14674
5.1192	7562.78	7855.99	24885.6	5118.1	4623.59	12405.3	3443.72	3422.2	5255.28	4045.56	4404.55	9848.31	13646.2	16775.5	10223.1	11362.7	6113.65	3406.83	12372.5	16804.8	1614.87	8503.52	781.557	20612.9	15484.4	10172.6	8716.51	3384.17	6090.66	9310.3	20874.5	25760.6	7190.92	3848.63	3285.55	2202.27	6206.05	9546.41	8455.07	6554.02	5633.27	5.184	8803.43	960.738	9764.17	7842.69	13072.8	1542.37	14615.2
5.184	7874.57	8077.87	25928.4	4706.82	4251.67	11882.1	3106.38	3166.25	5083.44	4054.12	4404.8	9689.16	13341.4	17251.3	10301.6	11192.5	5861.45	3245.64	12474	16176.3	1706.3	8284.23	838.312	19810.4	16001	9840.46	8174.96	3520.79	6120.09	8672.58	20089.1	24883.2	6687.18	3578.61	3269.16	2014.14	5718.37	9210.32	8438.47	6525.34	5487.51	5.2488	8646.41	967.556	9613.96	7678.85	12987.4	1542.43	14529.9
5.2488	7958.42	8044.78	27070.6	4257.28	4108.57	11563.1	2736.13	2896.26	4979.48	4043.07	4382.79	9334.56	13072.3	17379.2	10306.9	11079.7	5728.49	3160.92	12561.5	15834.2	1699.26	8005.84	940.325	19345.7	16383.5	9466.48	7541.24	3650.89	5978.3	8210.69	19658	24181.2	6311.96	3327.38	3339.59	1837.89	5028.36	8622.31	8427.15	6717.73	5330.65	5.3136	8499.86	976.917	9476.78	7522.94	12885.1	1536.4	14421.5
5.3136	7973.74	7924.02	27900.9	3863.26	4143.02	11280.9	2566.49	2673.52	4909.89	3889.76	4204.06	8819.51	12824.5	17202.2	10394.8	11100.5	5634.14	3150.04	12612.5	15701.9	1600.29	7695.87	986.433	19289.7	16508.9	9037.99	7019.53	3593.04	5772.16	8078.05	19820.8	23369.5	6018.12	3191.29	3434.88	1668.91	4288.83	7865.18	8407.48	7054.65	5023.02	5.3784	8356.43	979.451	9335.88	7376.98	12787.2	1532.86	14320.1
5.3784	7317.41	7979.48	28274.9	3591.45	4254.69	10961.1	2619.4	2553.86	4779.25	3640.63	4020.45	8253.87	12516.1	16738	10732.8	11215.1	5405.45	3231.24	12813.4	15865.2	1553.21	7359.67	934.834	19516	16396.5	8607.2	6736.62	3353.75	5634.3	8238.79	20037.2	22205.8	5743.45	3187.67	3489.07	1533.29	3790.88	7013.17	8404.41	7479.79	4634.19	5.4432	8248.67	969.757	9218.43	7278.92	12720	1533.14	14253.1
5.4432	8064.93	8124.01	28022.3	3466.07	4373.33	10654.6	2739.18	2391.36	4641.9	3387.72	3974.61	7869.62	12044.3	16222.9	11186.3	11361.2	5184.51	3398.76	13112.5	16286.7	1545.22	7072.61	803.968	19656.9	16233	8232.35	6670.68	3051.71	5501.96	8374.56	19892	20802.8	5414.34	3260.14	3478.23	1415.39	3639.19	6178.5	8429.5	7836.32	4199.39	5.508	8094.77	949.453	9044.22	7145.32	12649.3	1529.8	14179.1
5.508	7192.43	8198.45	27257	3426.89	4445.35	10427.9	2703.33	2204.11	4572.39	3301.28	3975.2	7572.33	11482	15729	11639.7	11464	5025.29	3592.73	13248.6	16800.4	1524.8	7015.19	669.239	19545.1	16248.2	7944.2	6639.63	2862.59	5360.66	8403.61	19190.8	19441.7	5170.73	3431.33	3411.66	1316.5	3802.92	5528.03	8473.04	7830.95	3816.26	5.5728	7998.02	925.286	8923.31	7072.73	12537.5	1517.13	14054.6
5.5728	7270.68	8045.73	26257.3	3379.71	4407.66	10260.8	2457.36	2157.4	4618.05	3477.75	4047.69	7282.88	11036.6	15220.2	11983.3	11474.7	4924.7	3783.68	13011.5	17423.6	1479.47	7021.85	667.78	19441.9	16485.8	7737.66	6691.15	2841.94	5253.16	8306.07	18222.4	18531.7	5131.85	3725.9	3306.71	1258.66	4179.36	5222.76	8599.67	7672.72	3619.04	5.6376	7945.8	908.119	8853.92	7037.68	12419	1500.11	13919.1
5.6376	7838.1	7705.15	25080.8	3310.52	4134.9	10028	2082.3	2133.02	4691.44	3777.55	4131.03	6955.33	10773.5	14664.6	12210.3	11542.3	4820.25	3937.55	12666.1	18233.4	1426.21	6967.11	702.613	19628.8	16815.6	7496.35	6742.96	2977.92	5117.59	8117	17597.1	17985.2	5327.12	4014.48	3189.46	1232.46	4588.98	5159.6	8762.16	7673.3	3539.67	5.7024	7901.87	897.358	8799.23	7004.52	12358.2	1486.93	13845.1
5.7024	7742.25	7373.57	23822.9	3365.68	3787.63	9765.46	1770.66	2172.85	4759	4094.5	4114.05	6561.35	10772.8	14154.3	12310.2	11691.6	4801.04	4003.91	12329.8	18970.7	1437.76	7032.47	652.258	19981.1	17063.8	7247.56	6821.9	3146.65	4952.83	7921.82	17419.7	17601.8	5600.37	4209.45	3124.89	1224.82	4820.13	5033.12	8881.46	7930.28	3508.26	5.7672	7864.07	887.213	8751.28	6976.86	12355.4	1478.44	13833.8
5.7672	8098.44	7207.16	22651.1	3601.1	3549.29	9527.47	1651.57	2231.32	4788.55	4260.84	4085.02	6150.95	10916.3	13970.3	12393.3	11754.6	4815.06	3882.76	11963.9	19444.2	1539.19	7156.88	654.587	20085	17128.8	7030.93	6887.08	3272.15	4812.65	7710.7	17593.2	17159	5800.75	4296.48	3169.57	1220.34	4750.54	4658.76	8892.84	8144.44	3519.7	5.832	7792.8	877.338	8670.14	6915.47	12400.5	1476.61	13877.1
5.832	7547.1	7103.77	21842.2	3942.94	3370.49	9355.35	1678.07	2228.15	4876.94	4264.43	4188.81	5878.75	11103.8	14267	12439.5	11578.5	4830.11	3639.37	11801.3	19623.9	1629.71	7263.76	685.991	19582.6	17076.8	6859.53	6920.41	3330.15	4726.34	7588.35	17768.8	16801.4	5783.62	4295.28	3174.14	1206.4	4439.99	4187.25	8857.02	8281.03	3485.97	5.8968	7733.06	869.532	8602.6	6863.53	12490.2	1477.2	13967.4
5.8968	8173.89	6925.37	21596.5	4259.06	3216.47	9311.15	1770.88	2197.22	5005.25	4247.26	4340.63	5773.44	11243.7	14810.1	12328.3	11256.4	4826.41	3376.89	11914.5	19377.9	1696.56	7323.25	713.916	18688.9	17054	6729.18	7015.47	3332.48	4654.21	7367.31	17810.7	16544.5	5428.42	4137.45	3095.7	1169.88	4065.96	3884.36	8787.48	8278.59	3326.08	5.9616	7669.2	870.352	8539.55	6798.84	12584.1	1470.45	14054.6
5.9616	7837.4	6648.57	21973.6	4462.24	2996.9	9330.01	1917.99	2132.35	5121.67	4275.64	4514.51	5701.43	11460.4	15532.8	12156.8	11038.1	4750.46	3148.42	12320.3	18953.4	1690.89	7351.26	750.734	17920.6	17035.3	6655.72	7113.06	3315.56	4562.22	7009.71	17832.4	16250.5	4979.31	3915.21	3059.81	1132.55	3825.07	3793.18	8659.67	8161.45	3149.91	6.0264	7620.29	878.813	8499.1	6741.47	12636.1	1454.51	14090.6
6.0264	7404.81	6201.01	22848.9	4503.03	2748.66	9340.08	2075.24	2036.64	5218.56	4347.39	4658.35	5532.14	11774	16344.1	11966.6	10919.7	4743.59	2975.98	12697.1	18474.7	1546.1	7314.14	790.006	17524.3	16788.5	6637.76	7241.83	3238.54	4474.35	6578.69	17931.9	15812.9	4604.54	3682.66	3054.02	1106.47	3832.57	3879.8	8616.6	7851.77	3113.58	6.0912	7636.74	896.428	8533.17	6740.31	12598.7	1431.89	14030.6
6.0912	7896.77	5753.32	24250.9	4425.53	2585.7	9205.86	2158.02	1950.35	5290.16	4469.78	4765.97	5407.65	12032.7	17197.7	11742.7	10910.2	4784.49	2883	13074.1	18207.9	1454.3	7317.23	828.803	17573.2	16380.1	6630.56	7347.57	3110.1	4430.83	6163.22	18005	15314.9	4490.56	3473.9	3057.02	1141.81	3975.53	3939.86	8713.84	7546.12	3218.88	6.156	7635.62	915.67	8551.29	6719.95	12546.3	1420.87	13967.2
6.156	7355.41	5503.82	25875.8	4291.44	2596.09	8955.64	2131.6	1926.68	5321.64	4608.13	4855.72	5451.44	12129.3	17716.4	11449.7	10899.9	4745.99	2917.52	13372.7	18454.4	1392.18	7219.34	779.227	17692.9	16063.2	6513.66	7293.24	2958.36	4402.85	5755.94	17711.8	14707.3	4457.25	3353.93	3058.75	1246.14	4260.6	3938.94	8857.69	7445.97	3391.78	6.2208	7691.72	931.836	8623.56	6759.89	12553.9	1427.21	13981.1
6.2208	7870.81	5508.39	27336.2	4155.73	2824.35	8689.59	2123.98	1999.35	5337.26	4810.21	4976.96	5607.43	12306.4	17773.2	11149.6	10868.3	4723.27	3077.23	13593.8	19222.3	1379.76	6973.84	771.389	17635.9	16097.8	6283.04	7152.09	2846.79	4344.4	5509.55	17206.8	14210.5	4430.02	3383.5	3099.21	1431.07	4616.25	3978.46	8947.52	7593.22	3515.14	6.2856	7745.48	935.875	8681.36	6809.61	12624.4	1447.09	14071.5
6.2856	7695.49	5708.46	28017.1	4047.85	3157.97	8411.18	2233.87	2060	5416.37	5090.36	5130.89	5789.83	12565.8	17409.3	10948.4	10728.5	4764.21	3186.93	13570.9	19892.7	1356.19	6723.12	849.258	17395	16414	6055.33	7074.25	2808.41	4220.25	5527.47	16800.6	14182.6	4480.58	3539.71	3227.38	1563.68	5036.06	4072.42	8890.41	8024.19	3497.75	6.3504	7850	929.362	8779.36	6920.64	12714.2	1472.66	14186.9
6.3504	7745.87	6051.52	27694	4059.23	3562.42	8277.08	2511.57	2086.73	5621.92	5428.02	5342.22	5967.96	13041.5	17078.9	10980.6	10543.1	4802.17	3224.65	13474.4	20496.8	1410.66	6592.53	920.445	17184.8	16678.5	6022.12	7069.49	2845	4153.71	5907.87	16688.2	14632.3	4512.23	3747.95	3441.56	1620.49	5562.55	4187.47	8785.01	8503.35	3393.14	6.4152	8011.61	921.919	8933.53	7089.69	12808.3	1499.93	14308.2
6.4152	7960.56	6583.81	26750.6	4298.4	3955.82	8211.23	2883.94	2140.78	5893.73	5925.13	5737.47	6092.92	13535.1	17014.5	11130.4	10375.8	4825.89	3364.03	13420.4	21274	1464.57	6527.84	885.824	17348	16781.7	6199.58	7112.66	2922.27	4254.46	6387.74	16916.2	15302	4580.02	3924.42	3690.01	1666.6	6095.62	4244.8	8687.82	8856.1	3253.3	6.48	8211.9	922.089	9133.99	7289.81	12903.5	1529.92	14433.4
6.48	8177.64	7218.41	25796.4	4789.61	4264.87	8297.58	3241.54	2255.42	6205.11	6621.09	6287.82	6166.12	13860.6	17409.6	11017.8	10163.7	4919.52	3562.8	13461.7	22293.9	1454.11	6531.76	773.477	17714.1	17003.1	6503.79	7157.42	3106.72	4452.55	6816.2	17266	16004.7	4774.11	4060.59	3835.36	1733.43	6620.47	4218.1	8659.33	8895.07	3096.34	6.5448	8408.15	924.56	9332.71	7483.59	12993.9	1560.89	14554.8
6.5448	8087.71	7730.53	25244.6	5405.71	4458.31	8478.5	3494.25	2371.76	6588.76	7465.52	6825.86	6335.81	14056.8	17976.9	10627.3	9843.99	5121.44	3725.16	13749.7	23241.3	1460.37	6660.61	721.615	17964.3	17192.6	6867.2	7167.19	3408.24	4580.28	7178.76	17249.5	16566.4	5089.49	4255.59	3792.34	1846.22	7021.61	4309.01	8744.84	8857.15	2971.13	6.6096	8611.84	930.556	9542.39	7681.28	13082.6	1587.74	14670.4
6.6096	8445.09	8044.36	25326.6	5942.1	4616.54	8823.94	3576.49	2517.23	6982.71	8398.79	7281.02	6680.59	14203.2	18533.1	10277.8	9542.9	5375.34	3901.44	14115.8	23947.4	1424.93	6998.6	774.592	18058.1	17207.1	7167.15	7353.29	3728.09	4593.97	7306.26	17019.2	17073.6	5387.94	4442.91	3696.13	1950.62	7130.81	4468.02	8874.59	9008	2888.92	6.6744	8833.17	947.698	9780.87	7885.47	13171	1601.06	14772.1
6.6744	8386.34	8188.66	25893	6281.17	4895.52	9283.76	3537.94	2804.96	7294.5	9285.6	7709.44	6964.81	14531.7	19275.1	10109.9	9433.77	5548.81	4102.88	14602.5	24694.2	1445.3	7444.31	833.454	18057.8	16998.6	7297.84	7798.03	3953.12	4610.89	7297.66	16988.7	17840.3	5521.26	4640.97	3618.78	2002.61	7000.86	4674.01	9011.6	9391.41	2907.98	6.7392	9088.67	970.188	10058.9	8118.48	13289.9	1607	14896.9
6.7392	8316.33	8147.74	26424.7	6380.73	5263.42	9787.53	3420.73	3311.06	7595.61	9934.81	8174.39	7166.78	15067.2	20113.3	10139.3	9441	5639.72	4264.96	15240.7	25553	1532.62	7831.63	1002.97	17979.1	16528.6	7238.49	8318.38	4024.27	4770.79	7573.63	17356	18995.4	5536.67	4802.57	3621.4	2058.89	6891.58	5048.7	9197.86	9856.94	3085.87	6.804	9331.53	998.508	10330	8333.03	13414	1606.04	15020.1
6.804	7435.14	7823.37	26793.6	6373.51	5658.58	10258.8	3228.26	3980.07	7755.7	10271	8596.26	7401.79	15886.1	21041.9	10324.6	9370.69	5760.41	4296.02	15828	26387.3	1668.45	8053.31	1095	17776.4	15996.2	7111.4	8600.4	4092.22	5089.92	8145.01	18113.9	20627.6	5382.25	4777.3	3736.65	2174.69	6972.26	5564.8	9368.89	10341.7	3433.46	6.8688	9568.07	1029.18	10597.3	8538.89	13508.7	1603.7	15112.4
6.8688	6778.52	7391.92	27054.2	6442.14	6061.66	10744.3	3068.34	4819.79	7806.97	10553.2	8866.24	7553.77	17061.8	22099.2	10526.9	9228.68	6036.6	4280.24	16102.4	27252.1	1758.93	8273.47	1044.17	17350.9	15442.5	6998.21	8680.46	4261.35	5480.63	8759.81	18891.7	22278.7	5149.44	4607.24	3947.37	2313.07	7225.61	6069.2	9467.81	10711	3850.37	6.9336	9815.52	1057.21	10872.7	8758.31	13477.9	1593.22	15071.1
6.9336	6480.17	7067.14	27175.8	6695.2	6474.57	11333.2	3089.19	5811.7	7837.05	11042.7	8999.5	7648.34	18508.4	23004.4	10546.5	9038.43	6412.64	4365.37	16217.8	28339.4	1761.95	8458.78	1075.81	16944.2	14924.8	7017.8	8744.88	4494.22	5862.07	9106.31	19396.9	23647.2	5091.1	4514.5	4163.76	2426.29	7447.97	6467.28	9636.91	10847.7	4318.25	6.9984	10114.3	1085.87	11200.2	9028.42	13508.8	1594.15	15103
6.9984	6401.64	6925.37	27259.4	7103.86	6916.72	12078.7	3300.9	6724.26	7938.02	11870.2	9121.86	8001.29	20175.5	23841.3	10410.1	8845.59	6866.3	4574.1	16386.8	29680.8	1755.45	8729.5	1167.04	16956.4	14571.8	7100.71	8867.89	4663.57	6182.26	9099.6	19650.8	24649.1	5329.12	4596.59	4443.89	2530.44	7589.38	6786.27	9873.51	10899.2	4820.72	7.0632	10469.4	1108.54	11578	9360.87	13570.1	1600.84	15171
7.0632	6534.46	6979.11	27338.4	7586.81	7457.21	13150.4	3645.33	7522.2	8191.61	12878.5	9430.81	8624.95	21786.7	24541.6	10282.3	8728.46	7242.99	4742.25	16647.8	30629.4	1805.23	9099.68	1256.88	17392.3	14412.3	7228.19	8992.07	4858.99	6432.43	9077.51	19774.1	25435.4	5797.67	4819.75	4843.56	2661.85	7725.12	7223.13	10096.1	11151	5221.24	7.128	10859.1	1129.07	11988.2	9730.07	13695.4	1612.56	15307.9
7.128	6819.28	7161.53	27511.4	8148.3	7964.62	14453.5	4027.09	8245.42	8607.38	13906	9975.03	9359.61	23497.2	25227.4	10203.8	8789.58	7385.08	4855.2	17046.5	30948.4	1863.2	9535.17	1314.23	18261.8	14328.8	7342.82	8983.71	5122.64	6670.45	9097.88	19717.9	26230.3	6323.7	5066.73	5264.92	2716.48	7817.85	7915.59	10361.2	11568.8	5588.3	7.1928	11295.8	1152.8	12448.6	10143	13877.9	1638.21	15516.1
7.1928	7063.51	7391.35	27723.8	8777.57	8442.35	15836	4338.31	8984.28	9203.79	14856.9	10622.2	10112.5	25428.8	25948.6	10390.3	8896.49	7438.41	4959.57	17788.8	30920.2	1961.33	10180	1360.69	19010.6	14376.3	7532.66	8985.52	5464.16	6939.2	9335.82	19622.4	27243	6832.4	5197.98	5656.86	2732.72	7928.76	8915.35	10645.2	12160.6	5922.51	7.2576	11761.4	1184.19	12945.6	10577.3	14092	1677.01	15769
7.2576	7148.94	7617.35	27777.5	9454.96	8916.64	17081.2	4459.91	9818.28	9933.69	15731.1	11364	10982.1	27719.5	26571.6	10779.6	8860.19	7665.4	5098.33	18639.3	31194.9	2103.28	10897.7	1425.07	19417.5	14524.4	7862.56	9188.22	5812.27	7212.34	9739.06	19814.9	28409.5	7310.31	5364.14	5874.27	2793.78	8075.86	10021.4	10777.6	12620.5	6160.57	7.3224	12201.2	1219.11	13420.3	10982.1	14330.4	1717.61	16048
7.3224	7133.6	7766.64	27541.4	10240.5	9383.5	17839.3	4368.41	10664.6	10619.1	16690.8	12324.2	12037.2	30079.6	26918.3	11108.3	8721.18	8117.06	5221.97	19589.3	31606	2266.83	11391	1468.06	19498	14733.3	8263.9	9577.73	6083.36	7431.12	10189	20379.7	29810.3	7776.35	5730.54	5909.07	2832.83	8308.08	10789.7	10633.6	12842.5	6362.26	7.3872	12635.6	1257.42	13893	11378.2	14573.6	1752.66	16326.3
7.3872	7049.99	7852.94	27019.5	11136.8	9808.97	18068.6	4213.8	11536.6	11201.5	17747.5	13672.1	13253.4	32165	27156.8	11323.6	8562.44	8774.89	5340.9	20625	31891.1	2375.37	11683.4	1514.72	19655.4	14839.5	8643.41	10079.2	6268.84	7639.57	10543.8	21057.4	31939.3	8255.62	6316.26	5956.25	2905.59	8714.94	11249.2	10429.7	13005.4	6584.9	7.452	13100	1299.98	14400	11800	14761.9	1773.82	16535.7
7.452	7072.4	7987.27	26360.3	12075.1	10282.4	18219.9	4162.74	12432.7	11731.1	18857.4	15391.3	14615.1	33854.4	27513.5	11407.6	8343.92	9488.7	5397.13	21791.1	32096.4	2511.61	12172.8	1565.13	19738	14786.6	8977.84	10508	6398.27	7831.05	10761.5	21615.4	34714.5	8871.62	6900.72	6089.06	3091.3	9321.89	11512.1	10411.2	13319	6922.46	7.5168	13630.9	1349.22	14980.1	12281.6	14840.9	1776.87	16617.8
7.5168	7321.13	8118.18	25691.2	13072.8	10883.1	18431.1	4245.86	13301.2	12333.4	20234.4	17534.2	16035.8	35288.7	28156.5	11383.8	8072.24	10222.2	5338.56	22986.3	32341.5	2570	13159.7	1628.26	19938.1	14832.4	9349.31	10906.1	6619.2	8117.2	11007.6	22023.9	37648.3	9524.94	7249.19	6216.86	3343.63	10056.6	11955.7	10578.2	13822.2	7326	7.5816	14223.1	1410.01	15633.1	12813.1	14854.5	1771.02	16625.5
7.5816	7619.19	8203.92	25175.7	14186.7	11485.5	18803.1	4394.83	14138.6	12959.3	21655.1	19961.7	17390	37104.4	28767.3	11386.6	7876.28	11047	5116.48	24209.9	32874.4	2564.72	14517.4	1755.26	20434.5	15055.7	9770.25	11265.4	6962.79	8492.68	11356.1	22273.3	40421.6	10079.4	7280.2	6344.87	3617.18	10614.5	12909.6	10791.4	14470.3	7814.62	7.6464	14862.9	1477.71	16340.7	13385.2	14907.9	1766.89	16674.8
7.6464	7959.18	8246.47	24886.3	15416.1	12177.3	19588.4	4569.97	14970.8	13604.1	22731.9	22184.2	18620.8	39395.8	29117.2	11633.7	7790.6	11905.7	4896.29	25768.8	34040.3	2585.18	15947.6	1897.76	21016.5	15563.5	10163.6	11538.9	7484.5	8927.02	11942.8	22500.2	42656.7	10529.4	7126.7	6537.34	3899.16	10838.9	14249.6	10945.4	15088.1	8438.13	7.7112	15567.9	1545.08	17113	14022.9	15028.7	1764.99	16793.7
7.7112	8338.62	8371.2	24874.1	16793	13103	20801.7	4703.01	15894.4	14340.6	23574.1	24021.9	19643.1	41948.9	29166.5	12214.1	7843.6	12852.6	4922.81	27714.9	35498.5	2713.3	17404.1	1964.34	21476.9	16407.9	10607.5	11971.6	8001.11	9356.23	12798.2	23219.5	44391.4	10872.2	7077.04	6926	4184.76	10820.9	15432.6	11081.6	15685.3	9273.04	7.776	16343.7	1607.63	17951.3	14736	15136.5	1752.14	16888.6
7.776	8601.04	8645.08	25250.4	18269.2	14345.7	22397.4	4867.64	17133.2	15166.9	24678.8	25161.5	20633.1	43972.3	29054.7	13021.7	8090.36	13977.4	5283.46	29766.8	37243.2	2914.72	18956.5	2022.56	21906.1	17455.7	11275.7	12474.4	8316.57	9746.1	13762.3	24498.2	45967.6	11175.6	7280.34	7595.34	4383.91	10836.1	16287.5	11183.5	16325.5	10166.2	7.8408	17204.5	1675.38	18879.9	15529.2	15184.3	1723.45	16907.7
7.8408	8659.92	9006.71	25989.6	19725	15720.3	24121.7	5220.5	18537.9	16036.3	26220.7	25949.8	21948.5	45717.2	28945.1	14052.2	8384.54	15161.8	5779.1	31516.5	39032.8	3134.97	20616.9	2186.16	22830.6	18485.4	12187.2	12881.2	8484.18	10231.5	14696.4	26101.9	48032.8	11311	7673.81	8468.08	4528.69	11058	17264.4	11190.2	17302.7	10993.7	7.9056	18137.3	1751.96	19889.2	16385.3	15198.8	1680.31	16879.1
7.9056	8666.44	9334.21	26990.8	21147.8	16977.7	25937.2	5734.38	19892.2	16875.9	28020.6	26701.7	23933.7	47639.1	29014.2	15083.2	8592.41	16459.8	6275.72	32830.9	40617.1	3393.61	21911.7	2532.76	24319.8	19501.4	13317.2	13234.4	8636.35	10806	15461.4	27782.6	50578.7	11339	8123.57	9325.2	4624.91	11652.3	18939.5	11160.4	18643.9	11619.1	7.9704	19123	1835.48	20958.5	17287.5	15210.7	1624.8	16835.4
7.9704	8923.05	9665.12	28246.5	22752.4	18006.3	27988.2	6156.86	21213	17772.4	30142.1	27380.6	26526.8	49834	29613.3	15952.2	8693.06	18009	6772.11	33554.9	41977.5	3640.48	22730.2	2969.71	26021.9	20712.5	14505.5	13606.6	9020.47	11313.7	16204.8	29250.2	53230.1	11474.1	8544.06	10054.9	4637.19	12403.8	21286.3	11139	20087.4	12030.5	8.0352	20125.9	1916.49	22042.4	18209.4	15240.7	1568.93	16809.7
8.0352	9479.61	10106.9	29473.6	24688.9	19034.6	30019.6	6383.38	22475.3	18874.7	32494.5	27886.2	29363	52219.1	30907.7	16717.7	8904.45	19882.9	7433.8	34049.7	43439.9	3829.18	22970	3382.08	27780.2	22225.7	15500.9	13979.2	9611.53	11677.5	16796.6	30362.1	55070.7	11852.8	8943.76	10709.8	4600.96	13161.2	24110.6	11173.2	21311.3	12277.6	8.1	21103.7	1979.4	23083.1	19124.3	15292.8	1523.46	16816.3
8.1	10151.7	10528	30478.4	26983.9	20358.9	31605.3	6376.81	23824.4	20049.6	34919.4	28422.4	32180.2	54276	32723.3	17512.7	9308.67	21974.8	8238.51	34543.2	45123.7	4001.34	22898.9	3812.19	29370.1	23851.9	16100.8	14452.4	10270.6	12130.3	17275.7	31427.8	55278.9	12533.9	9432.23	11384.5	4598.81	14000	26807.8	11250.5	22172.9	12620.3	8.1648	22077.5	2029.66	24107.2	20047.8	15367.6	1486.3	16853.9
8.1648	10758.3	10859.5	31484.6	29477.2	22199	33114.5	6201.5	25506.8	21236.3	36978.2	29310.4	34926.2	55845.4	34801.2	18360.3	9777.12	24376.5	9134.61	35258.8	46705.7	4120.69	22562.5	4154.11	30631.3	25295.3	16383.5	15145.3	10910.4	12789.4	17982.6	32626.9	54462.9	13517	10023.5	12081.5	4727.1	14955.7	29092.6	11307.6	22995.2	13100.6	8.2296	23080.8	2080.64	25161.4	21000.1	15444.1	1453.94	16898.1
8.2296	11322.5	11181.6	32860.9	31833.6	24675.8	34778.4	6024.91	27798.6	22386.3	38193.6	30367.6	37937.7	57130.8	36743.7	19228.4	10249.9	26911.6	10001.6	36646.5	47817.8	4248.09	21746.7	4326.58	31649.1	26489	16686.7	16085.2	11539.9	13643.7	19090.8	33979.2	53785.7	14708.5	10544.5	12799.2	4976.6	15978.8	31064.4	11308.8	23875.8	13691.9	8.2944	24131.6	2140.73	26272.3	21990.9	15492.1	1423.01	16915.1
8.2944	11845.9	11623.2	34578	33887	27771.6	37043.8	5934.18	30703.3	23381.6	39008.8	31547.3	41060.2	58295.9	38500.8	20466	10821.6	29367.2	10856.3	38311.1	48636.7	4542.28	20146.8	4425.65	32833.6	27366.2	17112.9	17119.4	12135.3	14692.3	20443	35398.3	53694	15870.8	10887	13471	5351.48	16838.8	32748.8	11351.4	24953.2	14373.2	8.3592	25170.6	2207.87	27378.4	22962.7	15494	1394.21	16888.2
8.3592	12377.7	12178.9	36302.1	35723.1	31069	40150.6	5959.69	33903.3	24310.7	39740.2	32557.3	44000.6	59109.3	39998.5	22155.1	11540.2	31501.8	11780.6	39993.9	49078	4870.29	17500.5	4606.17	34654.3	28000.7	17551.1	17987.8	12748.8	15841.3	22024.1	36753.3	54197.5	16791.8	11121.8	13962.9	5778.27	17438.2	33907.8	11546	26182.2	15097	8.424	26085	2266.62	28351.6	23818.4	15476.4	1369.84	16846.3
8.424	13076.7	12871.6	37881.1	37367.4	33971.2	43759.4	6027.56	37090.8	25374.2	40618.7	33432	46364.6	59320	41094.2	23776.1	12167.8	32897.4	12835.1	40847.1	48876.2	5155.11	14031.7	4880.53	36922	28691.9	17992.9	18678.3	13433.1	16906.3	23626.8	38311.5	54463.6	17418.6	11396.5	14360.8	6230.35	17897.8	34421.3	11843.9	27377.8	15793.7	8.4888	26780	2298.19	29078.2	24481.8	15451	1351.64	16802.6
8.4888	13926.7	13756.2	39349.4	38490.8	36054.6	47336.2	6242.22	39412	26658.2	41382.5	33854.8	47632.1	58799.8	41228.1	24828.5	12601	33350.1	13912	40876.4	48402.2	5528.66	10402.1	5017.98	38591.7	29779.5	18643.5	19228.5	14189.1	17725.2	24957.8	40370.3	53881.3	17837.2	11905.7	14778	6731.48	18423.1	34885.6	12262.5	28271.7	16475.6	8.5536	27215.7	2284.82	29500.5	24930.9	15379.6	1330.87	16710.5
8.5536	14927.8	14773.1	40898.4	38773.1	37034.4	50100	6561.41	40659.6	28033.6	41769.2	33789.6	47601.7	57514.5	40088	24875.6	12840.8	33063.3	14860.1	40055.8	47523.2	5996.23	7432.5	5026.34	39209.2	31389.6	19634.1	19935.1	14928.7	18282.4	26035.2	42848.8	52047.5	18423.7	12566.6	15253.5	7219.68	19133.3	35706.9	12867.1	28781.3	17382.8	8.6184	27377.9	2231.03	29608.9	25146.9	15237.2	1302.18	16539.4
8.6184	16167.3	15848.6	42605.7	38360.4	37363.9	51552.5	6704.2	40492.1	28855	41669.4	33499.5	46408	55084.3	37987.8	23849.7	12993	32060.7	15602.7	38996.1	46528.5	6487.81	5103.09	4990.82	38615.8	33307.5	20935.2	20855.7	15668.4	18828.4	27013.3	45547.8	49044.5	19357.9	12995.5	15719.7	7605.66	19977.5	36760.2	13520.8	28882.5	18646	8.6832	27276.5	2151.56	29428	25124.9	14989.9	1260.65	16250.5
8.6832	17663.5	16838.4	44463.1	37649	37651.4	51853.6	6422.78	39200.9	28967.1	40738.5	33125	44090.8	51416.7	35392.8	22019.9	13255.4	30556.8	16130.4	38023.4	45633.8	6784.84	3372.7	5104.09	36858.4	35024.7	22370.5	21773.1	16422.8	19658.3	28063.2	47843.6	45161	20733	13014.8	15720.1	7996.1	20864	37718.8	14044.9	28556.5	20156.6	8.748	26915.4	2063.64	28979	24851.8	14641.4	1210.88	15852.3
8.748	19198.8	17657.9	46304.8	37056.6	38237.8	51206	5799.96	37233.3	28632.9	38515.3	32868.2	40880.9	47104.4	32851.9	19663.4	13465	28842.7	16617.7	37113.2	44643	6970.1	2208.39	5364.66	33973.2	36103.5	23493.2	22493.9	17216.3	20476.8	29309.8	49296	40706.1	22430.2	12672	14876.3	8479.51	21946.6	38059.3	14286.2	27810.3	21465.7	8.8128	26340.7	1990.87	28331.5	24349.8	14243.1	1170.93	15414
8.8128	20413	18373.5	48088.1	36502.5	39080.9	50102.8	5069.8	35591.5	28512.5	34805.9	32725.9	37371	43074.2	30793.1	17043.2	13265.6	26921.5	17295.7	35824.8	42803.5	7147.81	1536.44	5592.02	30052.4	36862.1	23810.9	23012.9	17954.5	20944.1	30853.5	50538.3	35789.7	23909.8	12173.5	13183.6	9011.57	23113.4	37275.5	14351.6	26913.3	22280.9	8.8776	25623.6	1948.8	27572.4	23674.8	13894.1	1147.2	15041.3
8.8776	20949.9	19028.5	49786.8	35775.1	39538.4	48797.5	4431.5	34350.2	29074.2	30150.2	32347.6	34555.5	39680.9	29196	14396.9	12690.5	24567.4	18236.3	34010.1	39725	7312.01	1254.08	5730.62	25799.8	37401.5	23314.5	23450.5	18433.5	20800.3	32635.8	52337.8	30659.6	24886.8	11626.8	11250.1	9507.06	24014.2	35409.9	14352.3	26418.8	22683.9	8.9424	24825.2	1942.65	26767.9	22882.6	13625.4	1132.86	14758.2
8.9424	20842.3	19582.7	51457.4	34611.6	39116.5	47682.5	3913.61	33297.2	30180.4	25250.7	31494.3	32663.4	36888.3	27957	11937.8	11997.9	21547.8	19407.9	31979	36257	7339.66	1140.39	5810.81	21926.8	37559.8	22142.2	24097.1	18561.9	20089.7	34454.4	54301.8	25975.9	25312.5	10892.5	9596.27	9990.09	24296.9	32992.1	14287.6	26321.1	22679.1	9.0072	23918.5	1947.07	25865.6	21971.4	13406.1	1113.6	14519.7
9.0072	20289.9	20014.2	53347.7	32587.4	37613.5	46835.9	3430.76	31554.3	31285.4	20826.2	30157.8	30906	33822.6	27236.3	9703.17	11351.4	18169.7	20770.5	29741.4	32847.4	7048.91	1144.32	5986.4	18578.6	37169.8	20946.3	24940.1	18568.7	18942.8	35920.7	55288.5	22067.4	25555.4	9835.1	8499.85	10628.7	24059.7	30158.9	14265	26299.5	22262.6	9.072	22839.2	1938.88	24778.1	20900.3	13160.5	1089.39	14249.9
9.072	19291.8	20489.9	55496.6	29509.3	35380.5	46170.2	2960.78	29238.4	31555.3	17074.5	28815	28339.8	30307.5	26515.8	7691.31	10592.1	14825	22129.2	27269.2	29609.1	6571.08	1189.47	6129.38	15573.1	36287.8	20030.5	25861.2	18597.6	17526.3	36524.3	53751.1	18937.3	26073.1	8333.59	7688.03	11530.2	23673.1	26606.5	14460.8	26254.8	21546	9.1368	21539.6	1905.78	23445.4	19633.8	12854.2	1058.11	13912.3
9.1368	17699	21150.9	57176.7	25607.2	32669.3	45352.3	2544	26610.4	30107.7	13857.1	27606.4	24996.8	26821	25367.4	5914.98	9690.45	11818	23173.9	24479.6	26208.8	6000.06	1264.73	6060.48	12830.1	34652.2	19654.2	26637.1	18623.1	15986.4	35949	49504.4	16110.5	26967.4	6779.42	6948.68	12423.2	23322.2	22305.9	15042.4	26424.6	20785	9.2016	20083.7	1854.72	21938.4	18229	12505.2	1008.26	13513.5
9.2016	15798	22081.5	58161.7	21633.7	29522.1	43709.3	2291.9	24032.5	26960.6	11198.3	26328	21530.2	23406.8	23467.5	4485.43	8671.85	9297.53	23646.9	21555.5	22768.8	5449.61	1331.47	5896.35	10267.2	31727.6	19564.5	26907.7	18600	14568.3	34930.7	43636.7	13695.8	27804.3	5569.99	6178.43	12964	22954.3	17888.5	15935.9	26916	20096.8	9.2664	18582	1801.75	20383.7	16780.2	12091.5	959.961	13051.5
9.2664	13908.1	23201.4	58852.6	18050.5	26228.2	40387.2	2192.64	21432.4	22844.5	9200.92	24957	18559	20258.7	21232.2	3455	7492.18	7322.62	23665.2	18612.6	19711.1	4959.67	1317.32	5554.9	8045.43	27664.3	19598.9	26559.7	18290.1	13535.2	34077.3	37676.1	11676.2	27782.1	4799.03	5437.15	13216.3	22545	14057.1	16690.2	27514.5	19300.1	9.3312	17163.1	1767.2	18930.3	15395.9	11737.7	916.577	12654.3
9.3312	12153.5	24605.3	59519.2	14832.1	23061.4	35755.6	2093.42	18878.7	18766.1	7683.14	23192.3	16234.4	17359.9	19461.3	2743.9	6311.22	5905.44	23483.6	16025.6	17331.2	4539.98	1233.46	4984.68	6300.29	23217.7	19589	25845.2	17400.1	12733.5	33848.1	33113.6	9961.36	26543.7	4312.68	4721.9	13498.2	22088.9	11088.9	17012	27987.1	18269.2	9.396	15842.3	1748.62	17590.9	14093.6	11398.5	896.921	12295.4
9.396	10713.2	26044.7	59659	11831.1	20105.6	30591.8	1886.66	16046.5	15032.9	6415.02	20729.9	14076.6	14831.2	18297.1	2295.15	5158.65	4867.96	23187	13960.1	15726.9	4201.83	1129.31	4270.11	5182.24	19274.8	19360.3	25223	16095.8	11794.5	34240.7	30226.8	8374.33	24418.6	3918.71	4022.78	13843.7	21500.9	9047.17	16909.5	28052.2	16988.5	9.4608	14629.6	1733.73	16363.3	12895.8	11070.2	889.691	11959.9
9.4608	9674.38	27250.5	58651	9228.35	17076	25956.4	1590.57	12929.9	11779.5	5319.6	17503.8	11705.6	12700.8	17626.6	1977.48	4088.86	4095.28	23007.6	12419.8	14892.5	3870.77	1056.23	3556.85	4736.51	16143.7	18764.1	25007.6	14860.3	10670.6	34971.8	28576.3	7107.71	21936.7	3555.23	3361.72	13945.8	20655.6	7689.41	16635.1	27618.6	15616.5	9.5256	13512.6	1704.94	15217.5	11807.7	10789.1	888.529	11677.6
9.5256	8896.11	28249.9	56503.7	7236.67	13890.2	21898.8	1325.28	10053.3	9093.14	4489.12	14008.1	9206.85	10952.5	16959.6	1735.87	3294.09	3602.62	22899.1	11353.2	14701.9	3604.91	949.703	2946.01	4707.83	13863.6	17895.6	24731.5	13918	9468.76	35030.2	27246.2	6201.38	19571	3228.84	2819.01	13643.9	19518.5	6717.02	16427.7	26783.5	14393.8	9.5904	12477.8	1656.28	14134.1	10821.5	10558.8	890.919	11449.7
9.5904	8136.07	29132.6	53815.4	5849.7	10807.3	18513.1	1202.87	7779.89	6999.04	3991.51	10924.7	6930.92	9797.13	16122.5	1584.82	2884.65	3273.57	22753.4	10532.1	14736.9	3429.72	824.901	2447.25	4841.78	12059.2	16918.3	23887.1	13265.1	8315.63	33917.7	25662.6	5592.62	17394.1	2954.26	2394.24	13008.1	18121.9	5903.42	16193.7	25282.3	13407.7	9.6552	11492.3	1588.9	13081.2	9903.41	10380.6	898.698	11279.3
9.6552	7347.91	29883.8	50885.1	4935.94	8199.14	15876.7	1274.73	6359.74	5375.18	3789.09	8272.55	5292.11	9236.18	14971.5	1467.79	2692.73	3036.42	22423.4	9931.32	14402.6	3225.26	680.336	2034.98	4920.34	10328.3	15784.5	22182.1	12803.2	7161.06	32138.9	23473.1	5146.38	15455.7	2713.95	2066.65	12174.6	16618.9	5100.89	15770.9	23131.5	12619	9.72	10525.6	1504.4	12030	9021.23	10201.2	905.289	11106.5
9.72	6498.79	30281.5	47687.9	4358.85	6147.38	13931.2	1548.77	5517.45	4253.29	3786.96	5884.28	4300.24	8991.8	13472.2	1383.57	2550.05	2787.95	21904.8	9395.07	13449.8	2984.93	599.649	1628.69	4861.01	8833.57	14447.5	19732.9	12404.5	6009.6	29999.4	21137.6	4806.83	13942.3	2551.64	1817.73	11110.6	14970.1	4301.38	15268.7	20283.4	11726.8	9.7848	9592.67	1406.17	10998.8	8186.5	9969.28	902.003	10871.3
9.7848	5597.5	30110.7	44071.3	3923.19	4694.7	12551.4	1853.19	4952.41	3489.86	3749.14	3983.84	3667.62	8638.02	11739.9	1433.31	2433.71	2529.61	20925.9	8627.35	12265.7	2782.48	590.081	1155.66	4612.35	7627.93	13148.1	17011.8	11984	5084.97	27628.2	18928.5	4503.26	12955.5	2523.65	1622.44	9828.13	13174.7	3777.54	14996.4	17456	10669.3	9.8496	8730.1	1296.2	10026.3	7433.9	9700.79	889.97	10590.8
9.8496	4816.53	29500.6	39892.4	3431.77	3784.36	11403	1977.18	4451.46	2960.65	3604.4	2802.68	3361.55	7881.9	9943.95	1497.22	2272.73	2381.22	19307	7714.62	11332.2	2610.82	573.152	839.155	4185.92	6754.61	12137.1	14651.5	11429.9	4482.22	25160.9	16793.4	4309.23	12381.2	2577.76	1489.96	8529.13	11444.4	3651.6	14978.1	15092.8	9543.94	9.9144	7955.09	1175.77	9130.86	6779.32	9443.32	869.029	10312.3
9.9144	4224.48	28760.4	34992.1	2926.04	3234.22	10269.5	1944.84	3900.03	2657.19	3407.48	2171.77	3348.74	6996.21	8475.44	1485.51	2101.9	2333.13	17110.5	6868.55	10830.4	2373.9	573.368	775.147	3739.74	6142.12	11534.3	12959.6	10573.2	4077.29	22484.5	14989.8	4204.18	11969.3	2564.88	1382.75	7336.3	9996.93	3789.92	14757.4	13315.6	8579.95	9.9792	7247.41	1048.44	8295.85	6198.97	9212.18	841.482	10053.7
9.9792	3707.46	28029.3	29291.6	2502.42	2919.91	9064.8	1891.52	3335.82	2519.39	3200.89	1766.4	3444.83	6292.07	7521.56	1458.56	1955.31	2359.95	14561.8	6179.85	10810.1	2096.52	562.888	795.839	3580.41	5711.33	11081.7	11862.1	9436.24	3789.67	19830.5	13621.2	4079.91	11383.1	2386.07	1262.48	6361.01	8847.89	4086.14	13988.6	11819.5	7747.23	10.044	6599.78	928.991	7528.77	5670.79	9004.09	815.674	9819.77
10.044	3267.4	27228.2	23511	2200.17	2690.99	7984.71	1867.65	2970.72	2429.7	3108.96	1504.73	3567.36	5936.25	7059.44	1437.71	1865.93	2359.18	12076.3	5516.85	10248.9	1811.82	540.585	777.494	3803.15	5485.31	10505.4	11199.3	8146.15	3568.49	17590.1	12518.3	3953.58	10752.9	2109.57	1131.19	5520.84	7870.03	4147.22	12857.2	10455.9	7014.11	10.1088	6032.28	832.19	6864.47	5200.09	8786.5	798.277	9584.78
10.1088	2940.52	26305.2	18511.1	2035.09	2440.06	7109.28	1865.79	2757.82	2353.39	3114.74	1339.84	3625.17	5969.77	6746.19	1426.42	1788.45	2329.73	9958.4	4950.27	9212.21	1547.44	517.725	702.297	4206.02	5630.69	9775.07	10650.1	6975.12	3399.83	15957.4	11695.3	3839.83	10113.8	1843.67	1041.59	4670.74	7003.73	3705.49	11828.7	9096.12	6343.51	10.1736	5561	755.571	6316.57	4805.42	8520.51	781.002	9301.51
10.1736	2675.24	25103.5	14515.2	1951.11	2218.49	6473.69	1875.02	2574.36	2324.89	3143.6	1292.35	3528.01	6189.11	6245.83	1499.98	1666.75	2314.61	8336.69	4523.82	8638.44	1286.12	523.337	618.828	4593.74	5920.49	9079.33	9882.67	6095.04	3300.31	14582.5	11135.1	3693.54	9452.26	1663.45	997.918	3819.59	6278.57	3160.97	11117.3	7878.24	5830.8	10.2384	5123.62	687.064	5810.68	4436.55	8203.5	753.794	8957.3
10.2384	2427.99	23591.1	11492	1880.69	2040.2	6001.34	1902.46	2367.02	2342.96	3168.57	1350.15	3303.62	6407.23	5619.59	1585.68	1594.22	2313.97	6997.51	4200.52	8074.04	1092.35	531.752	559.215	3956.12	6096.81	8498.67	8889.57	5354.46	3378.35	12910.1	10723.7	3470.2	8743.15	1571.08	988.563	3126.22	5785.2	2778.38	10598.1	6803.13	5552.35	10.3032	4748.8	621.357	5370.16	4127.45	7867.35	720.841	8588.19
10.3032	2078.53	21963.8	9348.27	1834.16	1848.33	5658.63	2019.86	2143.36	2299.65	3181.71	1554.58	3112.24	6513.58	4837.3	1597.99	1568.94	2297.49	5804.4	4033.13	6934.69	1004.23	499.184	601.562	4332.02	6122.65	7923.05	8026.05	4704.71	3620.01	10821.1	10313.9	3085.12	8132.11	1585.97	1018.63	2660.96	5568.95	2595.29	10109.9	5926.02	5418.84	10.368	4431.72	564.458	4996.18	3867.26	7548.1	690.582	8238.68
10.368	1692.65	20296.6	7876.37	1814.39	1632.95	5424.08	2180.37	2006.07	2321.7	3152.76	1941.77	3001.43	6545.12	4171.94	1600.37	1533.12	2327.65	4722.13	3997.61	6956.65	1025.71	426.384	650.542	3736.51	5999.98	7203.38	7570.84	4133.86	3912.38	8523.67	9706.47	2714.31	7550.2	1619.67	1003.27	2343.24	5507.83	2537.61	9740.39	5255.23	5343.17	10.4328	4154.09	507.42	4661.51	3646.67	7289.94	672.375	7962.32
10.4328	1461.75	18351.3	6888.63	1871.88	1420.05	5290.63	2265.78	1888.79	2403.62	2958.48	2401.53	3012.11	6317.5	3836.8	1499.62	1530.84	2281.78	3843.23	3912.07	6297.72	1039.1	382.819	596.939	4095.79	5700.23	6378.32	7329.44	3717.7	4285.04	6452.9	8894.52	2416.24	6904.23	1617.38	969.971	2136.37	5370.16	2596.07	9489.28	4895.79	5315.45	10.4976	3908.86	452.478	4361.34	3456.38	7075.04	656.898	7731.94
10.4976	1364.68	16001.6	6211.42	2024.29	1262.42	5270.18	2182.71	1804.58	2561.35	2666.96	2778.09	3164.47	5800.88	3899.8	1432.38	1586.68	2160.2	3163.17	3723.75	6219.31	1011.38	430.408	544.588	4270.14	5383.46	5738.07	7022.9	3436.02	3689.89	4974.38	8199.03	2164.56	6228.28	1605.86	920.497	2004.19	5077.7	2714.78	9349.87	4860.76	5357.62	10.5624	3740.47	405.353	4145.82	3335.12	6865.45	637.79	7503.24
10.5624	1460.71	13628	5739.47	2203.45	1118.09	5340.95	1985.43	1762.54	2716.26	2440.61	3088.9	3362.68	5091.4	4105.68	1469.64	1563.47	2110.6	2650.49	3594.11	6398.62	1004.84	403.509	494.13	4450.69	5220.86	5349.51	6393.58	3236.8	4166.76	4064.66	7660.89	1885.37	5609.33	1624.22	846.354	1919.39	4797.51	2856.39	9343.73	4833.78	5365.92	10.6272	3570.73	365.598	3936.32	3205.13	6701.2	617.211	7318.41
10.6272	1697.52	11585.3	5343.37	2353.11	955.685	5423.38	1789.42	1800.24	2844.3	2329.61	3340.7	3469.93	4456.95	4243.57	1552.77	1396.03	2178.17	2182.98	3496.13	5967.8	1013.65	431.374	458.23	4668.41	5142.77	5167.02	5509.29	3174.33	3624.41	3547.68	7235.65	1682.39	5108.02	1651.69	816.056	1896.2	4682.79	3089.46	9395.3	4575.58	5122.54	10.692	3485.19	339.119	3824.31	3146.07	6558.28	600.395	7158.67
10.692	1933.06	9929.29	5004.04	2504.79	759.002	5507.57	1640.87	1934.77	3031.07	2325.97	3470.73	3423.1	4253.04	4292.41	1629.02	1293.46	2330.03	1744.94	3398.79	5567.54	1005.6	579.518	487.13	5053.19	5280.48	5005.79	4612.28	3237.96	4111.25	3169.4	7129.1	1588.18	4672.64	1746.14	837.486	1836.87	4767.17	3336.41	9491.67	4220.24	4750.88	10.7568	3429.43	328.501	3757.93	3100.93	6393.76	591.205	6984.96
10.7568	2169.68	8670.85	4731.44	2682.21	575.834	5584.19	1579.33	2089.14	3186.51	2361.66	3549.02	3300.07	4575.87	4289.53	1598.04	1282.49	2400.73	1411.59	3333.31	5985.24	975.03	708.31	525.778	4904.59	5557.95	4736.5	3945.57	3260.88	3585.84	2787.03	7510.51	1601.06	4259.57	1874.2	889.065	1680.58	4965.08	3546.06	9556.19	4033.93	4346.09	10.8216	3377.58	324.661	3702.24	3052.92	6233.68	581.143	6814.82
10.8216	2273.74	7744.14	4425.02	2840.18	487.852	5602.77	1605.56	2208.95	3217.26	2378.1	3557.44	3272.88	5080.71	4239.21	1492.13	1271.37	2342.57	1209.78	3283.05	5574.15	1001.13	740.072	543.893	4273.25	5773.23	4304.85	3523.12	3121.16	3978.02	2409.4	8316.57	1650.75	3944.9	1971.31	906.486	1562.56	5022.7	3642.31	9526.39	4148.02	4013.72	10.8864	3343.83	325.622	3669.45	3018.21	6066.57	574.968	6641.54
10.8864	2253.3	7057.59	4010.49	2927.61	482.394	5523.9	1716.47	2247.56	3199.95	2341.93	3586.85	3295.65	5479.22	4227.28	1431.24	1253.44	2258.02	1065.93	3273.75	5227.94	1027.31	745.521	632.102	4846.44	5926.7	3857.71	3269.14	2964.25	4071.77	2222.75	9041.81	1721.33	3723.98	1979.09	831.712	1525.53	4860.89	3587.18	9376.88	4283.05	3741.35	10.9512	3245.27	316.422	3561.7	2928.85	5926.8	557.975	6484.77
10.9512	2185.32	6401.95	3684.29	2940.1	489.559	5298.94	1794.47	2166.97	3161.1	2209.11	3761.39	3221.64	5540.86	4313.82	1376.53	1278.07	2246.86	947.56	3210.78	4792.6	1050.54	763.932	720.21	4038.35	5942.88	3473.52	3151.27	2870.27	3859.1	2293.24	9250.85	1858.69	3556.73	1899.44	747.044	1510.21	4557.56	3439.41	9170.93	4276.51	3603.66	11.016	3133.6	301.074	3434.67	2832.53	5749.97	544.123	6294.1
11.016	2111.26	5636.23	3515.23	2880.26	436.686	4938.53	1802.1	2075.19	3088.14	1951.94	4067.33	3053.81	5248.13	4448.37	1235.59	1335.42	2239.5	899.5	3034.6	4168.06	1057.24	763.882	756.248	4500.86	5799.65	3203.26	3125.93	2756.57	3503.27	2589.89	8841.34	1977.71	3380.99	1807.61	712.759	1522.91	4080.93	3280.84	8979.37	4092.64	3577.86	11.0808	3028.11	284.505	3312.61	2743.6	5588.29	529.794	6118.09
11.0808	2008.8	4812.64	3451.92	2783.98	369.553	4572.46	1764.69	1972	2999.53	1660.64	3583.79	2910.58	4750.71	4630.78	1081.13	1417.05	2188.96	903.706	2981.45	4408.12	1045.79	771.345	817.035	4673.3	5726.6	3025.94	3201.69	2590.19	4199.41	2931.78	7995.67	1981.68	3147.52	1732.43	718.71	1542.58	3423.84	3192.93	8793.13	3875.03	3513.22	11.1456	2912.01	268.233	3180.24	2643.77	5426.63	523.252	5949.88
11.1456	1859.78	4207.66	3515.59	2719.42	348.604	4367.18	1711.53	1811.95	2931.34	1480.12	4105.78	2886.55	4197.66	4783.48	954.466	1453.53	2184.91	954.156	2994.51	4409.18	1017.66	814.382	800.097	4100.22	5750.31	2870.37	3375.2	2384.49	3895.41	3124.84	6961.34	2015.4	2848.45	1691.62	700.744	1494.24	2821.33	3045.34	8588.04	3747.44	3467.97	11.2104	2851.81	264.04	3115.85	2587.77	5311.14	520.823	5831.96
11.2104	1709.9	3897.61	3654.92	2764.01	374.255	4345.38	1718.32	1546.09	2896.93	1400.76	4369.25	2924	3718.04	5018.11	842.712	1383.63	2198.41	1064.27	3047.94	4323.16	1008.65	898.059	755.581	4410.17	5962.4	2748.17	3529	2163.46	3732.61	3016.82	6099.21	2080.07	2574.5	1712.44	654.608	1414.8	2485.05	2827.01	8505.72	3711.33	3436.97	11.2752	2821.51	268.08	3089.59	2553.43	5238.95	519.64	5758.59
11.2752	1600.22	3762.51	3830.91	2888.45	380.846	4421.47	1722.49	1210.3	2944.39	1314.13	4327.65	2946.33	3462.23	5107.96	752.696	1238.81	2144.21	1188.06	3061.05	4431.87	1093.42	914.487	768.753	4579.42	6385.77	2673.5	3652.19	2020.53	3561.19	2709.78	5514.23	2231.41	2396.41	1768.67	682.976	1329.09	2356.8	2646.3	8642.47	3682.73	3335.35	11.34	2784.27	273.555	3057.83	2510.72	5191.05	520.695	5711.75
11.34	1490.87	3780.6	3973.62	3046.58	351.915	4471.55	1621.45	971.823	3134.85	1248.37	4172.13	2852.7	3389.18	5079.54	700.067	1153.07	2103.58	1283.19	2977.48	3824.77	1168.78	852.729	697.688	4514.75	7002.65	2667.98	3775	1947.15	3482.75	2313.78	4921.54	2415.66	2243.57	1801.26	805.695	1295.09	2288.61	2564.22	8863.88	3731.05	3174.07	11.4048	2755.72	276.524	3032.25	2479.2	5128.71	512.825	5641.53
11.4048	1443.52	3826.76	3996.36	3198.72	330.992	4388.74	1468.96	911.894	3337.36	1219.71	4272.25	2605.06	3446.96	5055.88	652.774	1237.06	2064.16	1392.15	2825.46	3635.27	1234.52	814.438	694.755	4176.21	7457.75	2697.26	3856.29	1869.14	3450.9	2007.48	4406.56	2542.24	2105.44	1828.35	923.726	1334.87	2151.74	2491.2	8924.69	3816.28	2890.8	11.4696	2708.64	273.371	2982.01	2435.27	5033.63	507.747	5541.38
11.4696	1567.3	3720.51	3890.09	3332.28	338.173	4170.16	1362.51	914.749	3481.07	1138.57	3607.47	2331.39	3495.25	4921.41	592.877	1296.23	1954.75	1499.12	2594.78	3875.05	1201.91	825.628	811.844	4690.42	7482.59	2755.21	3871.94	1796.11	3357.86	1787.35	4174.09	2484.6	2018.57	1891.01	998.016	1366.37	1877.3	2380.81	8741.08	3888.07	2569.76	11.5344	2642.3	262.719	2905.02	2379.59	4910.47	495.815	5406.28
11.5344	1792.11	3343.7	3650.6	3421.81	377.323	3836.76	1347.42	950.308	3607.66	1050.7	3961.61	2126.52	3521.74	4846.25	617.018	1271.19	1813.24	1555.84	2395.73	3604.78	1109.45	899.523	855.408	4200.17	7144.01	2854.95	4011.72	1743.75	3207.96	1609.59	4184.78	2327.74	2032.07	1965.05	1029.68	1342.55	1622.14	2264.09	8377.51	4115.26	2344.76	11.5992	2656.56	259.485	2916.04	2397.07	4836.96	497.769	5334.73
11.5992	1915.43	2845.06	3352.49	3455.32	411.055	3403.39	1444.51	1049.19	3674.42	953.636	4269.63	2091.79	3491.19	4714.26	737.988	1242.04	1734.3	1546.88	2359.25	3739.96	1048.84	1060.62	814.066	4770.79	6681.06	2884.83	4352.02	1697.63	3977.57	1530.46	4357.7	2098.06	2147.47	2032.67	1054.35	1276.57	1532.07	2309.45	8017.47	4557.07	2286.37	11.664	2634.31	251.754	2886.06	2382.55	4779.87	503.728	5283.6
11.664	1958.82	2436.65	3152.44	3402.12	408.615	2945.19	1652.65	1192.84	3750.53	828.731	4587.62	2193.11	3483.39	4492.03	881.612	1146.57	1758.45	1490.4	2519.14	3968.99	1042.8	1187.89	829.165	4384.18	6444.86	2798.54	3743.36	1632.81	3511.88	1559.15	4668.69	1879.83	2307.43	2031.23	1132.82	1221.21	1671.24	2530.72	7816.09	5021.24	2341.63	11.7288	2636.68	251.915	2888.59	2384.76	4724.05	496.591	5220.64
11.7288	2030.46	2143.73	3081.97	3264.77	383.836	2589.86	1824.03	1378.77	3759.29	711.834	3941.22	2277.18	3467.51	4312.46	1012.82	1036.28	1747.67	1455.03	2684.66	3977.37	1061.05	1244.05	914.821	3935.24	6608.08	2579.27	4152.59	1564.42	3829.86	1580.55	5176.38	1742.61	2444.79	1934.86	1165.05	1195.23	1963.29	2659.99	7782.84	5127.29	2360.85	11.7936	2611.35	259.251	2870.6	2352.1	4706.08	503.377	5209.46
11.7936	2166.79	2043.12	2985.45	3107.3	366.414	2490	1834.52	1535.8	3710.71	620.913	4347.8	2157.62	3382.49	4326.85	1071.46	996.601	1633.07	1454.66	2759.91	3819.06	1088.08	1309.41	941.97	4315.5	6982.97	2280.93	3683.58	1484.76	3068.84	1439.13	5806.35	1724.89	2467.13	1860.04	1077.28	1177.54	2162.72	2398.83	7858.71	4849.84	2276.44	11.8584	2580.67	272.999	2853.67	2307.68	4620.3	503.174	5123.47
11.8584	2297.07	2114.82	2790.31	2960.59	378.394	2603.25	1694.55	1525.23	3620.53	585.102	4056.42	1868.65	3131.26	4431.45	1091.7	998.128	1512.43	1432.75	2752.77	4422.23	1077.27	1420.7	934.952	4458.48	7325.39	1978.39	4442	1417.67	2397.17	1122.58	6169	1748.54	2405.91	1848.37	959.371	1191.67	2156.68	1879.08	8076.34	4430.46	2099.97	11.9232	2468.83	270.916	2739.74	2197.91	4516.78	496.355	5013.14
11.9232	2317.97	2256.64	2568	2848.18	401.879	2827.4	1509.9	1356.11	3483.37	611.564	3871.7	1569.1	2798.35	4667.73	1109.67	986.539	1407.83	1398.81	2720.69	3795	1079.58	1552.53	948.274	4362.98	7443.1	1761.4	3834.26	1323.25	1868.82	849.011	5897.3	1729.71	2306.85	1891.98	937.921	1267.58	1967.19	1497.59	8202.27	4022.98	1970.93	11.988	2421.04	268.334	2689.37	2152.7	4407.23	495.07	4902.3
11.988	2280.78	2409.49	2415.92	2788.96	397.633	2902.27	1430.44	1209.43	3301.73	681.897	4381.8	1274.17	2558.84	5084.14	1123.37	967.361	1362.59	1377.94	2817.42	4149.14	1099.52	1634.72	1025.28	4105.56	7295.18	1638.08	3962.63	1264.04	1438.72	670.98	5183.71	1728.34	2128.28	1964.12	958.652	1367.66	1779.59	1362.54	8037.27	3737.86	1964.52
Distance	031620_EV 30minAux_01	031620_EV 30minAux_02	031620_EV 30minAux_06	110619_EV 30minAux_05	110619_EV 30minAux_06	110619_EV 30minAux_15	110619_EV 30minAux_16	110619_EV 30minAux_23	110619_EV 45minAux_01	110619_EV 45minAux_04	110619_EV 45minAux_07	110619_EV 45minAux_08	110619_EV 45minAux_10	110619_EV 45minAux_12	110619_EV 45minAux_14	110619_EV 45minAux_15	110619_EV 45minAux_18	110619_EV 45minAux_21	110619_EV 45minAux_25	110619_EV 45minAux_27	110619_EV 45minAux_28	111119_EV 30minAux_05	111119_EV 30minAux_10	111119_EV 30minAux_11	111119_EV 45minAux_02	111119_EV 45minAux_03	111119_EV 45minAux_06	111119_EV 45minAux_07	111119_EV 45minAux_09	111119_EV 45minAux_12	111119_EV 30minAux_13	111119_EV 30minAux_14	111119_EV 30minAux_16	111119_EV 30minAux_18	111119_EV 30minAux_19	111119_EV 30minAux_21	111119_EV 30minAux_22	111119_EV 30minAux_23	111119_EV 30minAux_24	111119_EV 30minAux_25
	With Auxin	With Auxin	With Auxin	With Auxin	With Auxin	With Auxin	With Auxin	With Auxin	With Auxin	With Auxin	With Auxin	With Auxin	With Auxin	With Auxin	With Auxin	With Auxin	With Auxin	With Auxin	With Auxin	With Auxin	With Auxin	With Auxin	With Auxin	With Auxin	With Auxin	With Auxin	With Auxin	With Auxin	With Auxin	With Auxin	With Auxin	With Auxin	With Auxin	With Auxin	With Auxin	With Auxin	With Auxin	With Auxin	With Auxin	With Auxin
	Raw Intensity	Raw Intensity	Raw Intensity	Raw Intensity	Raw Intensity	Raw Intensity	Raw Intensity	Raw Intensity	Raw Intensity	Raw Intensity	Raw Intensity	Raw Intensity	Raw Intensity	Raw Intensity	Raw Intensity	Raw Intensity	Raw Intensity	Raw Intensity	Raw Intensity	Raw Intensity	Raw Intensity	Raw Intensity	Raw Intensity	Raw Intensity	Raw Intensity	Raw Intensity	Raw Intensity	Raw Intensity	Raw Intensity	Raw Intensity	Raw Intensity	Raw Intensity	Raw Intensity	Raw Intensity	Raw Intensity	Raw Intensity	Raw Intensity	Raw Intensity	Raw Intensity	Raw Intensity
0	3296.65	1567.62	3072.83	2262.07	2995.5	5011.35	1449.79	13544.9	7876.43	4656.9	5890.49	929.215	7462.09	11441.6	838.216	4296.7	371.916	7128.57	638.123	7821.49	12636.3	8110.51	4385.88	3728.62	1827.73	4410.28	4370.64	1739.07	5523.95	499.374	790.482	1158.65	6391.22	1672.24	12428.4	3807.86	2678.24	1274.22	1666.78	806.047
0.0648	3607.33	1813.99	2983.14	2112.63	3458.91	4713.4	1553.56	14198.7	7565.68	4889.5	5956.01	1061.85	7878.99	12082.5	780.884	4364.13	359.506	7474.02	615.914	8525.38	12549.8	7465.46	4016.87	3856.89	1863.78	4071.55	4477.1	1797.21	5565.92	592.861	791.006	1092.58	6280.02	1810.9	13132.7	3805.65	2749.1	1264.81	1884.18	811.145
0.1296	3914.15	1995.22	2942.16	1966.59	3868.89	4655.64	1789.27	14816	7222.86	4929.29	5957.16	1293.19	8113.35	12258.3	809.243	4256.52	414.405	7550.35	628.304	9245.86	12371.9	6950.31	3635.98	3967.17	1778.33	3871.53	4668	1964.77	5428.48	762.533	827.557	1010.53	6133.2	1819.88	13867	3688.8	2881.78	1354.87	2191.4	870.334
0.1944	4185.28	2186.94	3003.55	1817.12	4163.89	4917.44	2029.98	15268.3	7038.61	4710.41	5949.08	1547.47	7935.68	11962.6	835.081	4002.72	483.07	7466.01	717.525	9780.72	12126.6	6716.16	3421.57	4036.43	1721.11	3770.94	4935.94	2118.5	5319.76	892.834	857.251	1010.28	6069.65	1798.23	14310.3	3532.29	2947.1	1527.17	2529.02	1009.93
0.2592	4277.6	2338.65	3150.86	1657.65	4409.43	5404.82	2189.86	15461.3	6969.1	4443.86	6098.84	1672.71	7566.52	11584.5	870.501	3734.41	575.988	7437.27	848.098	10210.8	11884.8	6734.92	3539.72	3993.31	1763.42	3823.37	5117.59	2036.08	5389.64	972.942	870.539	1141.54	6022.73	1835.87	14505.9	3342.72	2849.62	1661.75	2809.29	1182.78
0.324	4318.47	2465.98	3343.54	1494.56	4698.44	6084.53	2288.13	15266.2	6968.94	4266.63	6234.26	1655.6	7271.23	11647.3	875.27	3545.25	642.661	7514.47	944.066	10542	11769.8	7019.04	3952.65	3917.44	1956.95	3970.02	5233.99	1796.43	5668.82	1124.77	842.048	1361.75	5906.02	1986.25	14548.1	3167.95	2641.18	1712.59	3001.8	1297.77
0.3888	4543.31	2760.47	3541.31	1336.06	5029.15	6895.38	2374.8	14902.9	7167.3	4255.01	6430.63	1733.23	7216.77	12189.2	843.158	3440.45	704.621	7626.97	1020.46	10900.8	11889.8	7545.5	4489.53	3933.52	2218.7	4088.72	5372.91	1598.27	6009.52	1467.42	786.823	1525.8	5840.84	2237.8	14499.3	3084.18	2582.49	1717.72	3087.2	1398.11
0.4536	5059.02	3024.96	3690.35	1330.18	5345.69	7668.13	2517.34	14721.8	7526.34	4280.65	6638.11	2008.73	7462.76	12830.9	797.956	3504.27	748.781	7723.05	1118.77	11385.3	12092.2	8109.35	4843.5	4015.96	2415.24	4064.2	5497.99	1523.46	6375.77	2028.06	711.949	1584.12	5871.21	2470.94	14248.5	3148.41	2712.3	1745.88	3141.23	1475.91
0.5184	5827.88	3217.27	3940.82	1466.46	5646.59	8410.59	2630.17	14739.7	7731.9	4201.62	6815.78	2355.11	7949.74	13236.6	782.326	3754.34	705.835	7778.49	1257.38	11986.5	12363.4	8380.99	4940.53	4111.04	2459.78	3939.32	5350.7	1527.55	6647.43	2729	621.075	1549.18	5888.85	2627.46	13583.2	3344.88	2855.47	1827.15	3193	1436.2
0.5832	6580.55	3291.41	4277.87	1610.12	5895.98	8953.82	2637.51	14881.3	7853.92	4234.49	7031.68	2598.48	8581.44	13450.9	801.308	4070.7	632.734	7843.55	1399.32	12506.6	12693	8271.05	4853.44	4226.01	2366.43	3778.2	4996.96	1552.51	6855.74	3259.34	624.567	1519.31	5807.66	2728.05	12949.3	3638.03	2916.93	1963.36	3109.24	1329.87
0.648	7061.76	3318.68	4553.45	1712.53	6185.14	9252.01	2514.08	14990.1	8189.59	4473.62	7343.39	2781.84	9121.42	13832.7	799.872	4436.91	543.009	8046.03	1533.06	12862.1	12976.1	7983.5	4759.88	4351.41	2225.39	3591.95	4735.83	1599.21	7033.56	3477.62	768.508	1532.54	5664.61	2859.64	13013.5	3884.21	2852.82	2145.29	2940.99	1253.29
0.7128	7341.53	3390.59	4724.12	1795.68	6563.01	9420.09	2227.61	15080.9	8747.41	4914.15	7581.86	2900.83	9563.33	14449.4	793.179	4770.55	559.932	8542.42	1624.74	13062.7	13248.9	7753.03	4770.71	4568.79	2174.32	3525.94	4662.71	1645.06	7167.85	3528.33	969.824	1567.02	5500.55	2990.99	13609.1	3999.29	2828	2328.01	2737.8	1198.01
0.7776	7647.59	3475.65	4622.28	1918.32	6936.58	9333.26	1874.58	15305.6	9277.66	5512.87	7544.92	3175.16	9951.47	15096.3	823.423	4875.25	694.996	9378.99	1683.74	13279.9	13551.7	7636.34	4896.87	4905.49	2220.83	3705.67	4639.45	1726.61	7181.43	3745.14	1166.56	1578.37	5362.89	3001.43	14060.2	4115.71	2865.26	2465.01	2601.23	1232.82
0.8424	8370.95	3727.93	4361.81	2060.12	7248.95	9406.76	1603.35	15807	9511.12	6326.06	7431.55	3753.41	10373	15346	857.397	4901.7	819.711	10448.1	1702.24	13754.6	13746.1	7597.82	5100.89	5253.03	2341.7	3968.55	4562.32	1847.5	7233.52	4384.05	1290.12	1557.17	5174.01	2829.08	13882.3	4385.06	2882.59	2521.03	2511.47	1291.35
0.9072	9588.68	4113.43	4096.26	2175.38	7551.34	9746.66	1484.52	16586.8	9206.01	7534.46	7480.97	4403.02	10555.9	15131.5	871.816	4903.56	906.99	11508.3	1715.88	14406.4	13859.3	7556.41	5248.4	5464.48	2568.38	4021.01	4640.55	1934.06	7349.7	5167.85	1302.5	1499.14	4919.52	2545.55	13251.1	4759.24	2824.68	2456.68	2431.31	1312.52
0.972	10914.7	4580.6	4020.34	2292.5	7944.72	10412.4	1577.38	17311.2	8692.37	8888.23	7695.14	5016.13	10284.9	14786.9	899.604	4874.8	958.418	12376.4	1800.58	14996.9	13974.4	7626.28	5310.19	5544.47	2821.02	3875.87	5083.94	1927.73	7572.98	5767.46	1228.57	1403.02	4601.02	2297.66	12634	4989.19	2773.22	2369.94	2451.06	1323.5
1.0368	11659	4956.69	4090.74	2550.64	8358.33	11134.5	1902.6	17755.6	8076.52	9862.93	7935.79	5462.68	9629.29	14556.7	874.387	4841.37	984.696	12833.3	1953.54	15374	14133.3	7876.12	5308.97	5579.02	3026.59	3718.82	5855.2	1936.17	7667.58	5984.31	1123.66	1311.77	4279.77	2225.89	12500.7	5023.94	2846.32	2347.59	2538.25	1313.09
1.1016	11728	5093.92	4301.74	2974.36	8725.61	11795.9	2308.87	17871.5	7812.69	10341.7	8238.6	5508.19	8945.29	14639.3	860.61	4820.56	969.394	13056.1	2126.34	15724.5	14065	8241.06	5247.61	5683.56	3151.84	3641.81	6807.62	1995.73	7589.86	5986.81	1009.05	1290.14	4258.95	2314.36	12994.9	4923.18	3074.51	2376.25	2773.79	1340.32
1.1664	11397.7	5028.14	4653.49	3455.3	9136.77	12386.5	2661.74	17870.5	7650.27	10376.4	8526.8	5142.97	8553.95	14972.6	880.356	4929.47	890.005	13375.6	2303.63	16417.8	13770	8575.65	5094.23	5861.34	3228.66	3670.29	7711.69	2129.45	7560.07	5984.46	973.589	1418.25	4453.34	2490.96	13904.9	4824.76	3384.89	2539.45	3096.45	1447.52
1.2312	11149.6	4992.78	5047.08	3888.76	9557.2	12885.2	2916.15	18010.8	7524.02	10324.4	8530.76	4672.62	8462.14	15796.8	898.274	5136.91	833.01	14023.7	2559.22	17442	13361.9	8729.47	5064.8	6026.34	3284.48	3689.32	8238.65	2362.97	7878.81	5938.54	965.13	1680.43	4833.74	2719.76	14580.4	4827.6	3596.59	2720.93	3398.43	1618.96
1.296	11134	5145.76	5432.85	4077.94	9825.64	13230	3104.31	18293.3	7452.52	10258.2	8212.94	4436.94	8515.41	17106.8	981.133	5299.61	847.74	14931.7	2944.43	18502.8	13059.9	8608.98	5176.85	6235.24	3444.68	3771.2	8489.6	2670.36	8317.8	5778.7	934.337	1922.6	5211.77	3043.93	14590.2	4767.29	3686.8	2927.5	3731.91	1801.09
1.3608	11395.5	5286.99	5790.53	4286.02	9616.99	13185.3	3246.16	18737	7581.29	10372.4	7955.07	4398.44	8587.64	18774.3	1060.95	5461.35	922.508	15974.4	3380.87	19146	12973	8114.77	5448.79	6506.69	3776.86	3975.34	8657.14	2981.28	8630.1	5779.46	967.457	2021.77	5505.34	3417.73	14258.7	4611.87	3731.43	3246.44	4093.44	1899.68
1.4256	11810.5	5328.31	6354.22	4550.19	9095.29	13037.6	3305.69	19383.6	7931.18	10673.7	7951.9	4640.93	8684.69	20938	1166.75	5820.89	1015.78	16870.5	3725.32	19191.8	12805.7	7423.04	5963.11	6751.2	4194.91	4223.69	8858.81	3212.08	8602.05	6094.99	1151.9	2054.72	5838.73	3697.78	14037.1	4441.83	3882.43	3719.98	4319.39	1876.1
1.4904	12258.4	5200.56	7259.82	4895.46	8617.92	12761.4	3355.48	20042.4	8345.53	10913.2	8025.92	4862.11	8707.27	23203.6	1324.52	6175.73	1093.74	17268.4	3918.17	18729.5	12467.2	6833.23	6641.5	6912.82	4555.77	4438.79	9029.19	3235.5	8496.03	6689.64	1469.65	2136.51	6242.74	3711.6	14130.8	4267.34	4274.81	4177.95	4340	1809.54
1.5552	12767.4	5091.6	8293.88	5390.51	8297.67	12424.3	3377.74	20355.8	8755.98	10752.6	7933.05	5144.34	8550.07	24995.9	1439.83	6471.73	1151.99	17355.1	3924.84	17812.3	11999	6598.58	7447.8	7067.37	4826.44	4675.02	9193.22	3194.84	8478.31	7294.85	1729.24	2329.72	6496.3	3421.72	14707.1	4172.49	4872.95	4491.99	4271.78	1778.09
1.62	13313.9	5194.9	9028.83	5960.08	8337.69	12105.6	3173.22	20161.8	9428.79	10357.6	7686.98	5374.26	8330.16	26194.2	1342.06	6628.59	1223.55	17615.5	3852	16770.7	11836.5	6773.52	8289.45	7353.34	5115.85	5053.31	9638.08	3224.76	8627.54	7649.95	1838	2617.14	6560.58	2995.18	15582	4218.2	5569.12	4741.32	4290.44	1811.62
1.6848	13781.9	5483.56	9153.72	6439.24	8387.13	11992.9	2879.3	19611.6	10576.4	9949.97	7555.38	5434.79	8060.97	27355.2	1127.29	6735	1264.84	18380.7	3856.43	15813.9	11849.9	7288.32	9153.99	7667.83	5560.11	5478.42	10316.1	3323.41	9022.74	7774.6	1880.78	2897.82	6551.74	2704.63	16441.8	4427.3	6214.4	5075.75	4418.74	1910.62
1.7496	14235.9	5749.96	9027.59	6713.54	8403.49	12236.2	2687.17	19199.1	11855.8	9629.04	7654.05	5590.94	7781.81	28595	1026.26	7026.39	1274.21	19574.2	4060.48	15218.1	12104.1	7883.76	9984.24	7860.25	6195.41	5790.36	10917	3358.19	9551.59	7730.23	1932.14	3037.53	6584.52	2658.22	16986	4796.91	6647.76	5623.67	4731.62	2027.55
1.8144	14817.1	6014.28	9169.13	6809.23	8597.74	12658.8	2734.95	18914.6	12912.9	9291.45	7803.31	5825.11	7533.82	29220.6	1199.34	7269.94	1269.48	20884	4389.12	15022.4	12311.3	8637.03	10657.2	7915.16	6967.76	5962.45	11411.3	3243.96	10092.1	7718.64	2068.2	3047.19	6773.38	2799.49	16851.7	5328.49	6889.41	6479.01	5094.66	2112.01
1.8792	15414.2	6395.4	9522.2	6908.92	8946.06	13324.8	2905.89	18737	13593.5	8902.04	8029.95	6232.79	7442.49	28984.7	1535.27	7386.22	1318.07	22129.9	4811.6	15134.7	12409.5	9334.27	11206.2	7848.51	7746.96	6068.9	12001.5	3207.9	10365.1	7734.93	2372.65	3055.07	7036.73	2996.57	16163.2	5868.86	7089.27	7529.24	5508.15	2189.82
1.944	15964.7	7025.38	9864.75	7081.98	9329.69	14389.1	3040.59	18630.3	13917.2	8626.37	8476.78	6827.2	7531.87	28297.2	1921.33	7415.93	1435.09	23121.9	5276.64	15629.4	12530.5	9794.96	11449	7821.6	8368.19	6168.66	12633	3442.43	10339.8	7665.16	2837.09	3284.31	7371.14	3201.42	15367.6	6099.54	7356.52	8642.47	6098.92	2245.35
2.0088	16557.7	7655.54	10137	7337	9554.41	16020.4	3174.63	18583.1	13877.6	8472.81	9205.37	7688.31	7866.63	27675.8	2342.18	7401.43	1556.3	23724.6	5835.89	16385.9	12621.7	9862.56	11357.8	7744.39	8688.2	6295.81	13147.2	3796.31	10200.3	7717.71	3273.11	3843.57	7739.26	3336.82	14689.2	5933.58	7764.05	9899.41	6879.89	2321.84
2.0736	17135.8	8135.65	10366.7	7637.47	9795.7	18259.3	3436.59	18524.2	13522.5	8447.95	9951.44	8587.74	8311.95	27166.2	2638.81	7299.31	1647.81	23980.7	6476.99	17134.4	12601.7	9561.19	11228.9	7695.41	8727.94	6421.78	13402.5	4189.55	10303.8	8046.86	3502.07	4606.48	8146.56	3356.19	14378.8	5647.46	8455.52	11486.7	7732.35	2496.07
2.1384	17584.7	8433.84	10543.3	7904.07	10209	20875.1	3949.9	18391.4	12880.7	8427.48	10608.5	9052.3	8753.83	26836.2	2990.33	7320.65	1640.94	24156.3	7111.72	17648.6	12546	9198.31	11269.3	7736.01	8797.23	6602.27	13443.8	4681.7	10602.7	8452.12	3546.29	5221.38	8564.74	3282.03	14223	5606.98	9436.74	13108.3	8454.45	2838.13
2.2032	17828.6	8524.51	10982.9	8120.5	10683.5	23743.9	4831.24	18284.3	12357	8413.94	11180.9	9044.84	9128.07	26516.3	3417.22	7778.91	1562.8	24309.9	7729.77	17949	12582.8	9219.85	11686.4	7981.05	8931.05	6967.76	13350.3	5296.85	11041.7	8789.36	3719.39	5550.13	9016.37	3139.6	14126.3	5786.9	10357.3	14648.1	9182.56	3279.9
2.268	17820.1	8443.65	12169.5	8348.39	10838.1	26664.3	5992.69	18130.1	12179.6	8609.12	11525	8950.84	9346.59	26178.4	4075.64	8471.32	1472.98	24317.8	8426.96	18133.5	12646.4	9774.94	12383.3	8339.38	9041.23	7379.41	13019.5	5881.4	11599.2	9078.43	4053.74	5767.8	9448.98	3070.38	14124.2	6025.06	11017.3	16231.1	9929.92	3676.09
2.3328	17777	8571.85	14082.3	8476.44	10786.6	29205.9	7191.07	17929.9	12211.9	8929.62	11717.6	8949.65	9512.72	25886.7	4907.69	9130.39	1435.16	24120.1	9114.53	18382	12785.3	10524.6	13264.3	8643.21	9003.51	7569.72	12603.9	6271.15	12210.8	9248.43	4465.63	6287.03	9852.83	3102.46	14274.8	6250.73	11417.3	17968.8	11146.5	3966.19
2.3976	17872.8	9072.75	16366.8	8440.67	10878.2	31438.7	8487.41	17844.9	12314	9203.12	12079.9	9055.73	9731.04	25857.7	5946.64	9625.93	1471.01	23980.8	9784.28	18727.7	12826.1	11200.4	14104.7	9086.42	8974.35	7624.16	12507.6	6449.77	12855	9267.25	4905.28	7346.35	10367.1	3360.2	14567.5	6385.84	11816.5	19675.9	13085.9	4084.93
2.4624	18125.2	9818.87	18566.7	8174.16	11165.6	33321	9968.63	18001.4	12565.6	9308.95	12592	9333.41	10109.7	26091.3	7131.1	9952.92	1568.49	24261.5	10382.2	19183.6	12880.3	11695.5	15114.7	9656.74	9033.16	7691.67	12690.9	6446.03	13449.2	9004.83	5503.19	8749.11	11055.5	3854.36	14841.3	6394.04	12219.3	20949.7	15458.6	4150.6
2.5272	18442.3	10668.5	20586.1	7873.89	11532.1	34614.2	11535.8	18198.7	13180.9	9306.05	13212.5	9813.85	10394.8	26492.8	8295.48	10190.1	1691.08	24848.5	11007.4	19776.4	13050	12322.2	16316.4	10325.3	9189.18	7788.91	12867	6319.94	13683.3	8561.8	6249.08	9848.07	11914.7	4360.18	14912.8	6318.2	12534.6	21703.9	17967.6	4368.85
2.592	18815.2	11357.2	22795	7703.07	11715.3	35499.1	13295	18438.3	13970.9	9263.79	14027.7	10332.6	10333.9	26698.1	9393.78	10207	1807.88	25103.8	11663.9	20274	13411.1	13170.6	17507.9	10954.6	9304.11	7816.94	12886.9	6098.43	13602.3	8278.05	7069.38	10382.4	12767.9	4699.56	14593	6307.73	12893.5	22267.4	20264	4705.48
2.6568	18997	11826.5	25193.9	7595.21	11647	36100.4	15255.4	18642.7	14812.2	9204.94	15135	10681.5	9940.8	26369.5	10251.8	9963.78	1887.09	24585.5	12239.3	20412.3	13838.6	14037.3	18537	11429	9358.48	7696.48	12731.2	5861.99	13579.1	8272.5	7912.43	10381.5	13724.5	4957.97	14090.3	6360.56	13435.1	23081.2	22052.7	5063.73
2.7216	18852.8	12052.4	27687.6	7474.67	11373	36477.5	16933.3	18791.2	15493.6	9117.74	16643.2	10773.6	9449.89	25652.8	10574.9	9623.2	2015.62	23501.9	12603.3	20208.8	14013	14751	18961.9	11866.2	9463.46	7441.37	12592.2	5788.95	13900.4	8404.99	8773.24	10350.6	14832	5297.11	13761.4	6488.43	14168.5	24445.7	23582.6	5428.69
2.7864	18596.7	12170.9	30043.2	7112.21	11002.8	36758.7	17888.8	19011.5	16153.8	8966.3	18817.1	10935.8	9045.57	24876.6	10445	9375.97	2189.02	22473.9	12784.2	19969.5	14042.1	15128.5	18719.9	12510	9628.96	7123.5	12441.9	6046.19	14410.2	8491.17	9560.58	10455.8	15789.1	5767.27	13741.9	6617.81	14683.9	25939.3	24997.2	5670.15
2.8512	18286.3	12187.9	32255.3	6717.59	10642.6	37092.1	18004.7	19375.5	16745.4	8669	21324.5	11378.6	8908.42	24413.3	10108.2	9258.68	2371.04	21975.9	12714.3	19851.2	14025.2	15393.5	18163.3	13132.4	9828.38	6818.87	12227.4	6519.43	14805.7	8389.49	10019	10679.5	16251.2	6324.04	13893.3	6566.24	14764.8	27167.7	26824.5	5742.16
2.916	18255.8	12199	34201.7	6365.16	10281.4	37447.6	17734.2	19889.3	16881.2	8310.66	23919.5	12039.4	8951.69	24351	9987.92	9375.62	2539.98	22040.3	12359.3	19604	14078.2	15708.7	17568.2	13505.3	10057.2	6592.3	12194.1	7126.69	14809.5	8135.71	10248.8	10746.4	16103.3	6845.43	13960.6	6330.25	14730.2	27862.2	29201.6	5693.1
2.9808	18535.6	12366.3	35449.5	6243.17	9975.28	37804.9	17409.6	20396	16505.8	8251.16	26474	12625.2	9025.59	24464.8	10249.9	9697.77	2703.95	22459.7	11956.3	19107.6	14214.7	15779.3	17205.9	13706.8	10200.1	6492.52	12529.8	7723.1	14584.6	7787.51	10560.4	10720.5	15934	7272.29	13906.9	6047.71	14950.8	27906.3	31607.3	5637.31
3.0456	18966.1	12732.8	36232.4	6380.64	9649.77	38144.5	17322.1	21074	15980.3	8426.63	28900.2	12951.6	9029.51	24424.1	10706.5	10065.3	2929.24	23038.3	11780.5	18716.8	14322.7	15182.3	17198.7	14068.9	10159.7	6506.39	13144.2	7996.65	14482.9	7517.9	10976.8	10653.7	16093.9	7885.17	13972	5875.87	15574.6	27488.4	33256.6	5648.59
3.1104	19357.4	13048.1	36358.5	6674.49	9374.06	38137.3	17510.5	21806.5	15651.1	8506.78	31424.3	13035.9	9152.35	24162.6	11107.4	10348.2	3308.69	23389.9	11932.9	18670.7	14454.1	14108.6	17409.5	14642.3	9969.49	6599.34	13809.7	7826.92	14631	7421.38	11207.8	10614.4	16799.6	8852.06	14294.5	5931.68	16475	26661.5	33547.6	5578.53
3.1752	19377.7	13169.8	36126.2	7018.98	9180.39	37422.4	17602.4	22507	15749.3	8398.94	34065.8	12918.3	9582.06	23805.5	11188.2	10532.8	3698.52	23329.6	12364.8	18731.1	14526.5	13120.9	17400	15205.2	9750.44	6751.75	14327.9	7575.86	14889.1	7486.05	11262	10644.1	18095.8	10139.8	14588.8	6201	17419	25522.7	32502.6	5363.04
3.24	19238.1	13248.6	35555.4	7249.06	8840.62	36377.6	17464.4	22973.8	16480	8241.2	36812.1	12570.1	10382.5	23201.3	11103.9	10600.8	3914.93	23103.2	12733.3	18527	14623.4	12718.6	17263.4	15643.4	9688.94	6847.08	14551.7	7493.37	15182.3	7651.96	11249.1	10869.7	19614	11188.1	14342.4	6456.72	18227.2	24154.5	30947.5	5001.71
3.3048	19124.3	13628.2	35396.6	7363.07	8329.86	35457.5	17249.3	23058.6	17580.2	8214.87	39583.2	12183.8	11372.9	22501.8	10880	10591.1	4017.73	22854.2	12656.6	18151.5	14576	12887.4	17201.5	16037.4	9699.96	6736.02	14559.2	7567.27	15574.7	7787.29	11248.4	11220.1	21168.6	11815	13505.7	6517.44	18694.3	22855.7	29980.5	4728.05
3.3696	19209.7	14195.3	36361.9	7476.54	7890.74	34692.3	16877.3	23057	18338.3	8329.75	42187	11917.6	12169.6	22309.1	10488.7	10447.2	4074.62	22508.5	12013.8	17878.8	14300.9	13316.3	17233.5	16484.1	9592.55	6491.56	14443.8	7915.63	16030.1	7734.03	11333.1	11413.9	22403.4	12225.3	12471	6321.19	18776.9	21681.7	29910	4699.03
3.4344	19289.5	14762.3	38448.4	7615	7508.56	34062.3	16372.4	23339.2	18479.5	8712.91	44480.3	11613.7	12511	22527.8	10102.6	10157.4	4120.58	22039.1	11136.5	17700.8	13972.5	13737.1	17182.8	16803.8	9392.42	6381.75	14315.8	8321.07	16401.5	7442.81	11460.4	11314.7	23505.1	12733.2	11770.1	5857.22	18632.7	20586.8	30288.4	4912.81
3.4992	18981.9	15159.7	40561.5	7749.87	7202.07	33655	15891.6	23850.2	18160.1	9141.16	46610.4	11329.2	12649.7	22574	9889.56	9803.85	4145.67	21516.3	10419.3	17530.9	13550.7	13955.3	17135.1	16866.9	9221.79	6492.57	14306.1	8469.49	16592.4	6961.61	11495.3	11040.3	24728.2	13549.2	11700.4	5253.16	18477.3	19584.1	30471.1	5122.02
3.564	18414.5	15081.7	41619.6	7690.92	6907.01	33239.6	15591.3	24308.7	17878.3	9357.94	48779.4	11019.5	12788.6	22258	9894.48	9506.52	4204.53	21114.6	10032	17364.8	13209.3	13938.4	17067.4	16706.8	9155.35	6657.94	14241.2	8273.51	16492.1	6440.15	11385.4	10939.8	26013.8	14559.6	12153.4	4720.22	18243.8	18780.2	30283.9	5117.81
3.6288	17933.2	14611.9	41803.4	7421.45	6777.79	32654.9	15575.4	24769.6	17607.9	9396.23	51182.9	10553	12956.9	21850.9	10049.6	9297.61	4286.73	20942.6	9981.33	17244.5	13077.2	13720.8	16826.4	16285.5	9066.17	6674.63	13904.5	7838.15	16172	6063.14	11007.4	11328.4	27236.9	15406	12725.5	4406.97	17913.7	18025.9	29920.2	4936.4
3.6936	17649.8	14008.6	41942.5	7087.55	6798.5	31949	15676.3	25375.3	17195.6	9481.26	53428.2	10041.6	13346.1	21293.1	10356.2	9019.25	4409.09	20977.2	10245.5	16978.9	13059.4	13515.2	16588	15994.2	8903.54	6497.59	13217	7443.31	15948	6010.81	10490	12174.1	28354.1	15925.3	12895.4	4290.72	17625	17113.1	29456.4	4723.33
3.7584	17624.6	13793.2	42298.2	6837.26	6859.21	31420.3	15580.3	26155.7	16827.3	9675.11	55121	9579.24	13784.5	20577	10530.5	8760.42	4566.45	21185.4	10621.8	16432.3	13205.5	13312.9	16493.8	16164.8	8802.92	6277.88	12384.8	7270.02	15984.2	6216.44	10007.6	12944.3	29262.5	16360.7	12676.4	4341.74	17481.9	16125.7	29068.6	4532.96
3.8232	17863.2	14108.9	42503.7	6838.23	6958.61	31183.6	15216.4	26741.2	16782.2	9806.26	55873	9252.94	13891.2	20052.9	10399.6	8606.5	4679.82	21426.1	10797	15809.2	13236.6	13014.7	16775.3	16913.8	8802.87	6170.1	11764.6	7391.79	16239.2	6461.56	9834.14	13296.7	30380.9	17185.6	12517.5	4608.04	17432.8	15172.3	29106.2	4420.53
3.888	18004.4	14648.5	42081.9	6985.1	6966.21	30774.5	14574.2	26923.8	16853.9	9678.93	56091.3	9141.98	13574.4	20057.3	10128	8392.29	4768.98	21652.6	10648.6	15268.9	12982.6	12493.1	17200.9	17998.9	8843.71	6245.66	11399.3	7585.78	16688.8	6511.02	10022.1	13182.8	31726.3	18605.4	12586.1	5068.86	17259.1	14182	29309.8	4477.77
3.9528	17658.1	15114.1	41375.8	7190.56	6833.36	30094	13669	26889.2	16963.4	9334.09	56396.1	9261.14	13369.2	20449	9696.18	8101.04	4778.28	21962.3	10125.9	14886	12524.5	11769	17247.5	19107.2	8767.29	6385.37	11088	7531.65	17086.2	6299.23	10323.2	12904.4	32897.3	20193.6	12700.1	5490.08	16912.2	13103	29016.1	4619.23
4.0176	16834.5	15484.1	40960.5	7240.37	6676.44	29160	12860.3	26922.8	16963.6	8975.33	56921.9	9478.96	13729.2	20674	9335.3	7866.62	4714.43	22382.1	9345.06	14622.7	12052.7	11210.1	16800.5	19798.8	8491.57	6386.1	10880.4	7076.67	17396.1	5898.79	10500.8	12567.6	33430.7	21285.4	12643.7	5619.96	16610.1	11939.2	28373.7	4708.04
4.0824	15884.5	15931.7	40840.8	7145.47	6598.21	28379.6	12489.2	27016.3	16889.5	8841.58	57492.6	9716.72	14536.5	20559.1	9147.84	7832.19	4635.33	22778.6	8589.89	14310.4	11835.6	10893.4	16010.9	20092.6	7955.15	6040.21	10731.7	6489.18	17434.2	5490.01	10430.9	12159.2	33378.1	21623.6	12466.3	5443.56	16514.2	10714.4	27639.7	4634.76
4.1472	15173.3	16502.4	40582.2	6926.41	6540.5	27745.7	12462.4	27111.4	16843.1	9001.41	57759.3	10139.3	15363.8	20298.3	9056.85	7852.5	4442.74	23137.2	8051.56	13844.7	11803	10842.3	15183.9	19983.8	7321.54	5523.07	10472.5	6116.96	17334.5	5145.71	10055.3	11579	33368.6	21411.1	12329.1	5170.97	16574	9859.62	26936.6	4430.52
4.212	14809.5	17038.8	40268.4	6584.14	6470.02	27175.4	12456.5	27126.2	16841.8	9008.77	57342.4	10600.5	16055.8	19961.5	9034.4	7829.3	4166.24	23438.8	7655.23	13310	11763.2	11085.5	14637	19348.2	6768.44	5179.16	10084.8	6077.74	17028.4	4937.14	9396.27	10732.8	33634.3	21223.1	12183.9	4927	16467.1	9515.28	26140.5	4134.43
4.2768	14765.4	17519.5	39970.6	6253.44	6385.13	27087.5	12374.2	27059.7	16899	8609.58	56713	10953.1	16600.3	19470.3	8976.6	7747.35	3863.03	23612.6	7125.33	12865.4	11676.5	11551.2	14428.3	18381.7	6441.12	5077.56	9659.29	6215.72	16519.4	4895.1	8745.54	9788.6	34013	21428.2	12029.5	4756.43	15879.5	9355.18	25208.8	3774.1
4.3416	14800	17954	39933.6	6004.2	6256.92	27548.8	12154.6	26874.2	16990.4	8021.62	56397.7	11109.5	17066.5	18900.6	8835.12	7654.59	3633.53	23550.1	6432.15	12645.4	11601.5	11970.7	14709.3	17227.3	6249.18	5137.61	9317.7	6287.64	15855.5	4783.83	8223.41	8780.22	34368.5	21886.8	12040.4	4600.32	14772.4	9027.98	24434.4	3539.33
4.4064	14639.5	18463	40155.6	5872.57	6251.28	28207	11774.3	26557.8	16987.5	7804.66	56111.9	11061.1	17512.5	18342.3	8624.5	7553.91	3538.54	23255.2	5757.4	12654.1	11425.2	12155	15296.8	16100.5	6062.17	5171.97	9165.9	6120.44	15229.1	4504.11	7771.44	7785.44	34475.6	22389.7	12179.5	4409.82	13478	8517.3	23745.9	3499.04
4.4712	14195.6	19057.4	40866.9	5782.93	6384.95	28825.6	11248	26182.1	16827.4	8018.02	55675.8	10857.3	17995.6	17653.2	8548.73	7549.35	3606.35	22863.8	5283.44	12792.8	11194.2	12143.7	15576.7	15146.3	5818.27	5151.81	9164.25	5728.81	14529	4328.9	7321.41	6959.26	34231.5	22771.5	12345.6	4136.91	12347.5	7933.63	23360.6	3528.27
4.536	13714.6	19568.6	42196.5	5765.52	6509.9	29413.9	10621.8	26128.6	16471.9	8349.98	54892.3	10708.1	18536.9	16713.5	8529.44	7800.94	3810.33	22470.6	5026.5	12991	10968	12182.2	15322.7	14493.1	5594.64	5255.94	9184.46	5381.19	13882.3	4399.06	6805.43	6376.5	33566.9	23122	12340.9	3815.13	11595.6	7338.97	23515.4	3606.33
4.6008	13425.2	19967.5	43669.8	5852.68	6657.28	30056.3	10178.2	26354.3	16010.3	8441.43	53824.1	10914.9	19179.8	15849.7	8467.65	8107.36	4034.58	21900.5	4982.34	13112.2	10833.4	12524.7	14663.1	14073.2	5432.15	5300.51	9017.03	5287.17	13580.2	4691.9	6333.28	6014.68	32828.9	23344.3	12081	3559.26	11335.6	6866.84	23968.3	3674.74
4.6656	13305.5	20258.4	44746.2	5962.31	6959.06	30423.5	9954.53	26379.4	15554.6	8443.8	52245.2	11449.7	19846.2	15213.6	8304.81	8349.68	4124.87	21173.2	5116.5	12987.1	10796.3	13048	13944.7	13800.6	5325.8	5272.12	8690.14	5392.99	13650.1	4989.74	5984.74	5830.71	32054.2	23400.7	11801	3428.63	11373.2	6507.54	24273.8	3659.71
4.7304	13336.6	20516.4	44938.3	6049.74	7300.19	30517.6	9803.75	26389.3	15254.9	8508.21	50109.2	12018.5	20462.8	14588	7976.21	8561.53	3977.1	20496	5291.53	12689	10790.9	13349.7	13471.9	13615.4	5255.74	5294.31	8618.51	5457.91	13868.3	5026.45	5825.89	5829.74	31354.9	23251.2	11698.7	3361.13	11467.5	6180.21	24110.4	3564.21
4.7952	13423.3	20523.3	44232.6	6170.38	7548.5	30464.2	9773.74	26474.4	15060.9	8754.95	47540.8	12523.4	20752.7	14021.3	7601.49	8648.23	3686.43	19885.5	5378.82	12323.8	10654	13193.4	13354.1	13381	5083.46	5419.05	8997.51	5387.93	13924.7	4861.91	5699.14	5920.9	30701.2	22827.6	11974.8	3278.49	11505.9	5841.61	23458.3	3488.52
4.86	13490.5	20138	43015.4	6425.33	7750.47	30378.9	9795.2	26733.8	14931.4	8963.07	44954.4	12969.2	20752.8	13754.6	7304.65	8674.04	3383.16	19207.6	5341.36	11897.1	10581.2	12617.9	13459	13013.1	4800.85	5545.26	9410.05	5279.6	13804	4597.41	5474.33	6055.93	30003	22241.5	12418.6	3228.74	11422.1	5533.95	22650.4	3447.1
4.9248	13587.1	19674.6	41870.8	6882.26	7883	30633.7	9737.72	27060.7	14846.1	9073.87	42851.6	13450.5	20605.6	13921.1	7071.23	8632.23	3237.37	18597.7	5331.51	11450.9	10705.6	11905.1	13546.2	12572.1	4445.12	5490.87	9479.82	5204.36	13601.5	4324.3	5153.74	6185.78	29394.7	21733	12664.6	3285.35	11226.1	5246.71	22025.4	3426.73
4.9896	13561.2	19315.6	41136.7	7489.75	7926.12	30954.8	9581.05	27389.8	14849	8935.16	41229.5	13994.4	20368.3	14333	6932.14	8364.09	3207.46	18254.8	5465.83	11174.5	10878	11300.8	13627.2	12158.6	4163.27	5324.4	9149	5115.07	13488.4	4119.25	4678.31	6315.98	28645.6	21476.4	12661.7	3411.51	11042.4	4978.63	21624.3	3376.51
5.0544	13335.4	19009.7	41155.9	8079.65	7876.89	31254.8	9407.02	27787.3	14937.6	8548.58	40258.7	14407.6	20091.1	14783.9	6958.99	7972.7	3243.59	18071.4	5793.14	11155.8	11038.7	10835.8	13672.8	12100.1	4093.59	5125.45	8631	4922.93	13552.4	3993.77	4163	6345.16	27884.5	21572.9	12530.9	3560.63	10763.9	4701.15	21415.7	3324.68
5.1192	13002.8	18786.7	41805.9	8581.95	7721.73	31373.2	9255.76	28192.8	15096.5	7973.67	39732.1	14461	19893.1	15116.6	7004.53	7708.85	3317.29	17904.4	6235.96	11035.4	11049.4	10247.8	13706.6	12283.2	4250.92	4958.76	8306.33	4739.85	13744.7	3975.95	3900.98	6285.7	27133	21982.7	12513.5	3715.42	10233.6	4396.52	21202.9	3309.52
5.184	12648.1	18758.5	42633.1	8813.87	7587.79	31292.5	9162.43	28481.5	15340.1	7441.11	39471.4	14318.6	19898.3	15174.4	6960.94	7588.55	3326.41	17729.9	6643.22	10750.4	10925.9	9420.78	13753.5	12341.2	4458.77	4846.38	8156.22	4647.29	13713.9	4013.81	4023.33	6198.79	26162.2	22266.7	12624.2	3881.17	9543.94	4171.4	21096.3	3286.17
5.2488	12301.5	19054.3	43062.4	8664.86	7506.44	31168.2	9111.15	28549.2	15911.6	7275.09	39317.9	14166	19994.9	14930	6816.25	7465.47	3291.69	17572.7	6777.64	10752.8	10684.8	8627.94	13716.4	12093.5	4550.32	4776.4	8167.47	4627.46	13409.7	3936.79	4331.14	6307.61	24870	22134.3	12886.7	4070.1	8908.2	4000.76	21002.2	3127.84
5.3136	11857.2	19667.8	43336.9	8292.25	7494.85	30771	9210.49	28280.5	16479.6	7476.4	38974.9	14262.3	20225.8	14723.6	6594.5	7137.14	3220.16	17500.7	6602.3	10960.6	10288.6	8173.7	13556.8	11567.6	4487.76	4696.68	8383.81	4631.39	12945.5	3737.54	4510.92	6591.33	23766.4	21537	13343.8	4191.02	8513.83	3865.56	20695.7	2909.49
5.3784	11309.9	20220.8	43633.2	7936.12	7492.13	30637.6	9352.4	27833.9	16657.2	7759.57	38439.7	14714	20627.1	14833.1	6484.28	6782.48	3074.31	17703.2	6197.58	10974	9777.8	8165.57	13100.1	11010.4	4386.13	4552.45	8745.18	4630.93	12495.3	3607.89	4517.45	6847.93	23083.2	20647.7	13811.7	4258.09	8258.73	3684.78	20258.9	2693.9
5.4432	10890.2	20681	43906.6	7709.67	7575.73	30923.5	9320.45	27281.6	16585.8	8017.68	37726.3	15287.5	21177.3	15182.3	6568.64	6422.51	2934.48	18272.4	5726.77	10724.3	9274.28	8566.65	12520.9	10696	4321.53	4448.93	9125.97	4596.26	11999.6	3546.09	4343.76	6932.56	22767.8	19935.7	14015.8	4296.62	8092.98	3460.34	19670.2	2552.42
5.508	10784.3	21016.3	43876.8	7562.99	7761.9	31342.4	9144.33	26630.5	16685.1	8113.95	36804.1	15910	21472.5	15583.9	6750.2	5957.39	2846	18944.8	5299.21	10519.7	8896.18	9138.64	12016.5	10769	4326.8	4356.84	9131.99	4467.96	11467.9	3444.99	4054.28	6822.2	22540.1	19533.5	13755.5	4309.56	7989.47	3292.43	19026.7	2442.12
5.5728	10753.9	21110.1	43328.7	7468.26	7826.3	31478.3	8987.14	26094.7	16957.7	8092.76	35864.3	16360.9	21432.1	15965.9	6914.24	5504.16	2785.62	19402.3	5019.34	10427.6	8672.71	9585.13	11600.3	10975.1	4417.06	4285.56	8732.82	4332.9	10834.2	3318.36	3707.43	6541.86	22209.9	19208.2	13284.4	4277.57	7986.82	3215.02	18555.4	2281.91
5.6376	10604.4	21189.8	42793.6	7464.45	7823.96	31320.1	9053.88	25549	17179.7	8114.42	34997.2	16599.5	21218.2	16289.8	7091.13	5160.76	2787.1	19571.6	4955.45	10445.4	8493.85	9699.41	11392.3	11015.8	4499.73	4205.34	8260.63	4246.15	10356.1	3240.76	3486.71	6135.91	21895.6	18687.9	12892.8	4272.14	8034.21	3182.45	18376.6	2112.62
5.7024	10454.2	21586.3	42414.4	7566.08	8009.59	31176.4	9121.04	25151.2	17199.6	8305.87	34476.7	16670.3	21163.2	16617.9	7161.7	5159.85	2898.34	19535.7	5065.37	10604.5	8190.51	9513.27	11394.8	10917.6	4607.39	4194.74	8159.34	4136.64	10223.6	3195.93	3367.01	5760.27	21674.7	17979.4	12617.8	4411.95	7959.76	3107.57	18422.9	2018.73
5.7672	10300.2	22125.5	41827.4	7690.32	8259.8	31044.3	9028.17	25004.4	17222.7	8404.13	34384.1	16655.4	21570.5	16999.7	7259.66	5421.74	3092.53	19414.8	5192.33	10884.1	7715.63	9134.84	11476.5	10830.7	4762.53	4246.73	8401.51	3988.6	10327.6	3178.68	3294.01	5431.42	21609.7	17439	12554	4646.3	7766.05	3058.05	18552.1	1992.55
5.832	10167.2	22523.9	40812.4	7949.46	8465.27	30890.9	9080.83	25258.2	17120.3	8100.2	34870.1	16636.6	22615	17422.5	7537.85	5610.32	3309.88	19378.7	5212.33	11150.2	7319.48	8820.53	11601.7	10752.7	4953.65	4237.93	8791.92	3710.8	10597.9	3201.65	3288.5	5232.84	21870.5	17057.4	12718.6	4827.92	7634.85	3005.72	18539.7	1942.3
5.8968	10238.1	22751.6	39210.2	8350.11	8659.64	30905.2	9243.66	25907.1	16764.3	7443.52	35720.4	16711.2	23953.2	17931.2	7990.17	5653.85	3564.89	19542.7	5068.85	11318.8	7193.38	8890.3	11849.7	10734.7	5135.16	4157.53	9086.85	3439.64	10933.8	3219.62	3333.23	5138.99	22236.8	16725.9	13036.7	4965.48	7657.68	2945.42	18468.1	1974.85
5.9616	10348.8	22876.1	37391.3	8954.86	8854.82	30887.8	9380.91	26560.2	16460	7038.99	36462.8	16658.5	24747.3	18396.2	8530.59	5688.86	3871.54	19766.7	4827.67	11434.9	7318.11	9243.69	11986.1	10783.6	5329.61	3979.83	9155.02	3314.58	11145.4	3265.17	3456.02	5166.56	22550.8	16383.8	13440.8	5074.56	7808.78	2930.94	18452	2001.6
6.0264	10538.7	22830.4	35945.3	9586.09	9264.13	30736.3	9529.74	27076.5	16293.2	7090.06	36748	16203.4	24790.3	18547.8	8937.49	5611.99	4128.63	19882.6	4553.4	11520.7	7601.9	9338.27	11732.7	10934.5	5499.38	3788.99	9215.23	3288.18	11187.2	3347.78	3643.27	5283.44	22824.8	16043.7	13825.9	5094.25	8111.68	3038.67	18390.6	1989.31
6.0912	10730.7	22669.4	34985.5	9891.93	9828.36	30322.2	9957.81	27307	16139.2	7500.25	36663.8	15505.2	24277.4	18294.3	9023.22	5441.68	4288.21	19670.5	4370.9	11511.3	7807.95	8777.43	11351.9	11177.1	5505.41	3724.64	9262.54	3191.92	10895.9	3429.11	3866.55	5479.73	23004	15827.6	13950.3	4972.74	8343.77	3177.88	18179.4	1941.57
6.156	11008.6	22508.5	35065.7	9723.17	10434.4	29565	10843.3	27175.4	15875.3	8031.11	36823.7	14886.6	23964	17924.5	8972.96	5302.78	4446.9	19354	4326.76	11390.4	7834.38	7762.01	11086.2	11551.3	5352.54	3710.37	9245.99	3029.17	10346.8	3543.09	4021.01	5683.38	23240.4	15833.7	13657.3	4811.24	8344.03	3361.05	17733.9	1881.36
6.2208	11440.4	22669.3	36088.1	9284.52	10972.5	28756.3	11820.2	26794.2	15523.7	8618.38	37165.6	14620.3	24285.2	17616.1	8994.34	5343.6	4548.96	19274.2	4448.12	11321.9	7760.64	6673.58	10906.1	11874.9	5065.99	3590	9238.22	2927.12	9914.42	3731.86	4083.14	5836.57	23283.4	16059.8	13100.3	4802.34	8230.19	3518.88	17434	1898.88
6.2856	11673	23236.7	37583.5	8888.66	11392.1	28247.8	12755.4	26178.5	15145.4	9175.39	37306	14735.8	25166.3	17487.3	9023.48	5369.42	4541.75	19603.6	4658.72	11444.3	7593.41	5912.51	10809.8	12000.2	4772.12	3295.67	9244.12	2925.28	9837.64	3949.21	4049.49	5872.24	23133.2	16462.8	12610.7	4914.86	8232.26	3578.27	17449.2	1933.49
6.3504	11689.1	23922.5	39038	8753.73	11564.9	28087.2	13599.9	25380.9	14790.7	9311.98	37402.2	14942.1	25945.6	17666	8948.92	5112.8	4473.15	20098.6	5014.3	11735.1	7308.95	5632.74	10647.8	11801.2	4602.26	2897.62	9330.36	2991.85	10010.5	4145.47	4035.02	5837.35	23051	16920.2	12447.4	4952.02	8443.15	3546.68	17829.2	1956.9
6.4152	11391.5	24360.3	40378.8	8820.89	11414	28150.3	14169.3	24730.7	14539.8	9061.81	37641	15203.3	26283.3	18139.6	8769.46	4692.57	4450.13	20504.3	5451.36	12094.7	6941.05	5761.38	10516.2	11456.9	4660.97	2628.65	9553.31	3057.87	10222.2	4345.32	4116.77	5794.99	23379.2	17196.7	12363.4	4731.09	8781.29	3538.93	18484.3	1966.35
6.48	10867.5	24532.1	41625	8983.85	10931.3	28375.3	14262.5	24165.5	14325.4	8630.05	38332	15340.1	26213.7	18828.7	8719.6	4409.32	4500.86	20754.7	5832.29	12345.9	6504.01	6130.16	10595	11251.1	4906.02	2559.37	9853.24	3109.6	10303.6	4510.91	4277.66	5786.54	24270.8	17238	12204.3	4271.14	9175.19	3546.72	19097.8	1972.41
6.5448	10301.7	24356.7	42853.4	9138.32	10296	28879.6	14022.6	23730.6	14088.2	8216.38	39250.7	15531.3	25738.2	19483	8837.36	4286.52	4704.04	20648.5	6010.72	12445.3	6191.33	6659.53	10728.1	11363	5159.92	2642.04	10068.3	3125.2	10143.7	4541.87	4490.96	5754.52	25507.7	17231.9	12048.9	3817.99	9449.51	3562.45	19602.7	1995.89
6.6096	9779.32	23908.1	44053.5	9229.84	9764.62	29350.4	13851.9	23596.4	13944.8	7860.79	40029.8	15774	24921.5	19994.5	9061.85	4224.74	5073.86	20109.4	6008.52	12486.8	5907.18	7549.98	10810.8	11743.6	5239.62	2773.18	10111.5	3062.99	9826.2	4452.43	4773.8	5681.37	26852.7	17439.6	11934.8	3599.64	9605.85	3617.91	19981.6	2059.2
6.6744	9410.36	23434.1	44799	9371.68	9451.78	29403.2	13856.6	23677.2	14038.8	7476.7	40592.5	15793.2	23736.6	20428.7	9395.37	4175.94	5468.3	19363.9	5896.72	12543.9	5686.3	8657.93	11065.5	12170	5147.56	2961.38	10055.4	2916.19	9574.73	4451.06	5153.42	5625.57	27952.5	17980.1	11784.6	3687.48	9667.62	3800.85	20470.1	2121.75
6.7392	9182.02	23161.5	45135.6	9536.14	9240.09	29025.4	14089.2	23815.5	14026	7152.53	41254.1	15714.6	22480.7	20688.2	9789.19	4238.36	5738.83	18749.7	5892.34	12643.3	5526.76	9743.54	11584.1	12412.4	5075.7	3203.3	9947.6	2730.06	9404.61	4678.69	5498.02	5812.5	29070.7	18614.3	11497.1	3981.1	9902.19	4122.87	21130.5	2223.17
6.804	9081.62	23288.2	45085.3	9679.98	9121.73	28481.3	14554.8	23834.3	13916	6896.53	41990.2	15342.1	21456.9	20572.1	10168.6	4507.15	5842.64	18422.8	5980.41	12762.3	5366.68	10621.2	12286.3	12484.8	5103.63	3444.36	9819.48	2587.66	9280.76	5043.73	5728.59	6345.15	29944.7	18951.2	11124.7	4314.02	10312.8	4525.09	21787.3	2370.35
6.8688	9236.88	23745.2	44816.4	9715.64	9128.38	28120.4	15254.9	23535.3	13760.9	6763.81	42727	14635.7	20761.1	20064.1	10460.6	4752.94	5929.68	18229.6	6063.33	12812	5232.44	11243.7	12730.7	12418.6	5211.75	3708.39	9629.44	2503.38	9062.94	5385.21	5780.36	7149.13	30610.5	19088.1	10719.6	4567.82	10584.8	4853.56	22404.9	2504.98
6.9336	9669.16	23962.7	44445	9581.54	9196.84	27779.1	15861.4	23062.4	13605.9	6834.05	42938.8	13697.7	20081.3	19263.7	10551.3	4820.29	5958.18	17905.9	6065.91	12603.4	5101.2	11532.5	12539.6	12149.5	5367.84	3950.4	9354.49	2458.43	8743.11	5532.58	5707.57	7914.2	30896.6	19200	10277.9	4748.14	10539.1	5040.85	22847.5	2594.82
6.9984	10333.1	23817.1	44359.9	9497.15	9276.61	27815	16366.3	22982.4	13645.9	6996.43	43213.9	12729.2	19859.5	18623.7	10474.1	4813.97	6008	17856.7	6116.65	12422.6	5112.33	11564.9	11930.8	12085.8	5669.66	4164.59	9152.08	2543.34	8515.28	5560.53	5688.57	8409.53	31344.8	19715.6	9949.72	4944.78	10552.3	5265.4	23319.1	2662.17
7.0632	10939.3	23257.2	44160.3	9387.45	9174.26	27965.2	16958.2	23204.1	13696.1	7122.23	43538.7	11874	20160.3	18052.8	10169.8	4873.99	6019.33	18267.8	6291.92	12275.5	5220.72	11278.4	11144.4	12189.8	6010.86	4342.39	9135.8	2786.36	8476.88	5493.05	5770.23	8535.48	32206.5	20371.4	9760.23	5128.27	10602.9	5638.89	23592.1	2638.66
7.128	11368.3	22605.7	43918.4	9192.24	8984.12	27948.6	17728.7	23592.5	13853.9	7274.47	44033.6	11249.1	20819.3	17671.4	9803.5	5128.27	6034.77	19042.8	6559.67	12365.1	5455.54	10829.4	10832.7	12546.4	6290.08	4479.89	9336.15	3080.57	8798.78	5258.4	6084.37	8332.59	33391	20824.9	9839.71	5183.55	10631.2	6174.78	23775.5	2597.98
7.1928	11616.9	22181.6	44400.1	8900.88	8836.44	27937.3	18264.2	24085.2	14143.6	7457.45	44567.3	10824.8	21229.2	17646.4	9576.41	5397.13	6041.11	19743.4	6893.57	12744.6	5752.3	10433.2	10915	12930.5	6534.94	4413.56	9643.7	3341.19	9417.48	4867.16	6605.63	7965.14	34926.5	21043.5	10116.7	5075.3	10741.8	6794.25	24040.3	2609.78
7.2576	11654.3	21987.2	45747.8	8583.76	8794.93	28269.4	18407	24311.3	14552	7398.41	45148	10593.2	21183	18030.7	9317.72	5645.3	6082.9	19986.7	7168.43	13340.5	6002.84	10296	11047.5	13262.3	6837.34	4216.97	9899.8	3620.07	10116.3	4482.3	7165.46	7654.21	36514.3	21152.9	10297.2	4989.69	11188.2	7431.43	24639	2686.83
7.3224	11525.4	21892.6	47489.8	8497.57	8858.81	28562.2	18531.4	24225.5	15188.5	6932.55	45445.2	10429.5	20887.9	18642.7	9011.93	5809.99	6162.16	19895.2	7325.62	13861.3	6260.69	10419	11313.6	13670.9	7270.01	4083.97	9993.46	3932.52	10680.6	4242.09	7648.96	7564.29	38210.6	21414.3	10260.6	5005.33	11973.4	8101.44	25510	2834.85
7.3872	11403.5	22097.1	48877	8699.2	8953.04	28707.5	18855.4	23838	15700.7	6483.03	45584.3	10214.4	20577.3	19190	8791.32	5870.67	6317.61	19718.9	7328.32	14170	6534.94	10382.2	11804.5	14071.2	7743.45	4077.28	10030.6	4153.36	10997.1	4263.42	8070.69	7771.03	40061	21830.2	10130.9	5091.35	12790.3	8709.42	26442.6	3034.84
7.452	11385.7	22559.3	49364.4	9055.5	8978.15	29025.7	19243.9	23449.6	15993.5	6330.07	45323.9	9776.92	20414.6	19325.2	8506.4	5965.32	6620.05	19557.7	7156.44	14269.1	6812.64	9884.16	12422.7	14311.2	8158.18	4090.21	10097.3	4215.19	11011.1	4490.5	8484.7	8078.32	41779.1	22222.7	10078.1	5115.62	13441.7	9193.98	27377.7	3156.86
7.5168	11311.4	23157.4	49170.9	9265.35	9128.32	29102.3	19518.5	23235.8	16103.6	6528.93	44235.4	9357.56	20202.8	18966.4	8262.65	5977.03	6832.11	19436.4	6821.75	14182.6	6923.19	9027.35	13055.9	14338.1	8471.74	4120.32	10264.4	4218.46	10700.3	4809.82	8666.76	8390.6	43143.7	22599.5	10195.1	4977.13	13751.8	9657.39	28300	3086.99
7.5816	11189.5	23395.4	48719.9	9200.33	9308.02	28753.2	19555.4	23245.7	16090.5	7008.41	42586	9126.47	19855.5	18330.4	8095.22	5952.93	7057.64	19411.8	6396.91	14121.7	6861.14	8307.64	13560	14311	8761.66	4226.98	10634.8	4211.63	10157.8	5141.64	8670.92	8613.17	44650.4	22895.3	10342.3	4761.49	13680.5	10188.2	29150.5	2953.43
7.6464	11161.1	23192.3	48320.2	8952.21	9467.16	28204.7	19467	23558.5	15914	7698.39	40992.6	9210.03	19410.6	17901.3	8086.67	6092.68	7367.44	19517.5	6035.74	14168.9	6660.88	8062.3	14027.1	14271.5	9027.47	4465.05	11157.1	4210.6	9562.73	5336.46	8675.6	8901.7	46487.9	23091.4	10365	4638.54	13646.2	10891	29893.7	2881.38
7.7112	11274.8	22804.8	47869.3	8725.07	9766.39	27785.4	19562.3	24111.4	15472	8289.58	39822.1	9599.7	18960.9	17906.4	8275.51	6305.48	7766.92	19787.5	5848.35	14352.9	6473.45	8219.61	14638	14228.6	9215.76	4821.12	11473	4237.69	9243.68	5438.87	8740.59	9324.04	48339.1	23308.8	10162.4	4691.46	13784.3	11600.9	30265.1	2868.36
7.776	11569.9	22436.4	47384.8	8601.33	10023	27664.9	19850.3	24562.7	14860.1	8526.58	38841.9	10136.1	18543.4	18150.7	8740.02	6466.73	8132.65	20243	5871.88	14540	6418.33	8483.11	15214.8	14214.2	9286.6	5136.38	11379.2	4276.44	9368.25	5616.95	8810.69	9763.24	49146.7	23484.2	9822.68	4793.64	14103.3	12231	30154.3	2840.27
7.8408	11801.8	22502.3	47225.2	8602.22	9951.5	27640.9	20226.6	24716.3	14300.5	8448.59	37515.2	10719.2	18186.2	18268.5	9300.65	6637.51	8179.51	20629.2	6060.83	14474.6	6479.27	8677.53	15693.2	14281.6	9330.3	5247.74	11235.7	4302.12	9689.13	6015.15	8923.25	9857.98	48553.6	23407.4	9723.55	4872.67	14652.8	12886	29826.4	2833.1
7.9056	11769.3	22957.9	47266.3	8683.21	9562	28096.3	20655.2	24669.8	13824.9	8368.32	35531.7	11238.9	17875	18144.2	9946.86	6760.32	7954.15	20573.9	6473.53	14234.1	6580.57	8981.47	16090.2	14420.5	9492.76	5110.8	11385.1	4422.37	9989.86	6551.58	9172.45	9593.28	46836.8	23097.5	9898.92	4934.99	15484.3	13573.6	29629.8	2911.04
7.9704	11553.1	23568.6	47231.8	8734.39	9223.17	28685.5	21228.2	24480.2	13439.9	8354.86	33292.1	11456.3	17618.8	18075.7	10453.5	6808.67	7550.3	20010.9	6986.77	14228.4	6632.31	9476.96	16679.3	14610.1	9719.47	4930.05	11930.5	4673.03	10206.6	7003.61	9422.04	9266.43	43885.1	22711.3	10266.1	4995.62	16634.2	14430.4	29862	3105.65
8.0352	11327.9	24090.8	47216.1	8770.75	9252.75	29219.6	21788.9	24151.7	13283	8474.18	31132.6	11373.9	17383.2	18039.3	10759.8	6851.46	7131.58	19253.5	7473.36	14550.6	6545.26	10088.1	17495.1	14735.7	9920.53	4856.15	12806.3	4963.54	10439.1	7154.11	9723.84	9192.13	40303.4	22443.5	10819.9	5019.86	17884	15369.7	30263.3	3279.28
8.1	11250	24265.1	47295.2	8758.03	9618.81	29406.6	21967	24150.6	13305.5	8781.73	29278.5	11066.6	17234.8	17912.4	10848.7	7060.79	6862.24	18593.9	7814.41	14810.2	6463.97	10783.1	18197.4	15055.4	10155.4	4826.35	13778.4	5213.16	10789.4	7062.25	10129.4	9404.33	37091.3	22352.9	11236.2	4965.86	19023.3	16406.1	30576.8	3416.21
8.1648	11488.8	24291	47323.7	8669.65	10166.9	29266.6	21797.6	24509.5	13580.4	9209.84	27619.2	10758.1	17281.3	17753.1	10762.4	7435.58	6714.24	18094.8	8120.07	14832	6535.35	11386.1	18787.7	15618.3	10517	4749.64	14411	5408.89	11397.7	6911.08	10747.7	9782.65	34696.5	22283.7	11402.7	4892.83	19780.1	17516.8	30676.9	3556.29
8.2296	11902.9	24345.1	47105	8495.89	10832.1	29074.6	21409.4	24788.3	14243.7	9551.15	26052.9	10561.6	17431	17661.9	10671.5	7782.02	6561.67	17807.6	8434.52	14564.4	6606.26	11850.7	19301.8	16407	10882.3	4671.32	14668.8	5531.22	12063.4	6830.13	11498.7	10081.6	32976.3	22054.7	11441.7	4911.62	20066.1	18878.4	30704.3	3681.67
8.2944	12334	24176.1	46652.3	8318.83	11307.6	28849	21013.1	24687.8	15097.5	9565.98	24492	10462.7	17720.3	17471.8	10684.9	8033.91	6377.78	17860.4	8925.41	14296.3	6569.31	12110.4	19835.5	17167.7	11112.7	4667.7	15053.2	5588.08	12632.4	6808.96	12336.7	10086.5	31629.4	21577.1	11415.7	4973.03	20019.2	20630.1	30516.5	3766.86
8.3592	12531.6	23683.3	45969	8240.42	11366.5	28475.6	20715.5	24176.1	15900.2	9448.68	22656	10479.7	17893.2	17129.7	10837.6	8269.53	5992.33	18352.3	9578.94	14324.2	6295.24	12398.6	20406.7	17541.3	11182.7	4825.6	15649.5	5652.91	13087.4	6728.5	13134.1	9919.77	30995.6	20827.6	11275.5	4992.44	19797.6	22653.9	30072.9	3895.5
8.424	12429.2	23149.8	45148.1	8308.29	11143.3	28041.6	20573.4	23468.3	16546	9516.81	20590.1	10660.1	17728.9	16743.4	10958.3	8479.83	5576.2	19214	10229	14624.1	5855.34	13031.3	21202.3	17367.2	11140.6	5078.3	16139.3	5796.52	13507.6	6557.48	13875.1	9935.39	31005.2	19967.6	11035.2	4947.17	19529.7	24616.4	29332.9	4038.91
8.4888	12220.9	22664.6	44513.1	8517.51	10842.4	27965.3	20659.2	22744.5	16935	9837.03	18962.6	10943.5	17237.4	16538	11054.1	8571.52	5414.89	20120.1	10491.2	14925.7	5436.47	13966.2	22152.7	16867.2	10950.1	5334.2	16111.7	6003.2	13828.4	6461.38	14423	10208.2	30772.3	19050.7	10870.7	4880.74	19160.5	26079.5	28577.5	4123.37
8.5536	11963.4	22219.8	43861.6	8932.97	10785.1	28373.3	21019.4	22284.4	16878.2	10163.1	17823.4	11184.8	16639.3	16563.9	11020	8371.03	5495.23	20746.6	10219.4	15190.5	5096.49	14781.1	22905.9	16308.2	10663.7	5530.14	15660.8	6280.1	13891.2	6497.57	14823.5	10693.3	29513.4	17951.1	10891.1	4794.83	18455.1	27145.5	27872.7	4206.49
8.6184	11790.9	21851.8	43138.2	9504.49	11098.4	28861.7	21428.7	22277.2	16473.6	10352.9	17003.7	11411.5	15963.3	16851.2	10806.4	8001.38	5603.68	21115.9	9660.37	15296.2	4869.24	15142.7	23178.1	15991.4	10415.7	5629.84	15278	6660.98	13703.2	6534.01	15090.2	11163	26923	16608.3	11016.4	4627.73	17490.3	27915.8	26916.2	4307.44
8.6832	11766.4	21291.3	41951.8	10069.7	11584.8	28977	21579.7	22401.5	15909.6	10470.5	16010.4	11619.6	15334.4	17291.9	10594.5	7648.22	5467.95	21493.7	9222.13	15240.6	4805.02	14997.3	23069.2	15761.2	10347.4	5749.85	15269.3	7058.62	13508.2	6432.18	15200.5	11246.9	23000.1	15174.7	11324.5	4359.02	16437.1	28665.8	25463.9	4316.56
8.748	12027.4	20508.5	40297.4	10377.5	12131.2	28337.6	21255.3	22491.9	15614.5	10528.4	14775.1	11890.4	14800.1	17545.6	10401	7462.56	5080.43	21817.2	9129.35	15145	4811.99	14464.4	23012.2	15411.8	10392.1	5973.01	15486.3	7308.34	13506.1	6280.51	15282.9	11049.2	18156.9	13669.2	11592	4060.33	15397.6	29320.2	23476.5	4254.07
8.8128	12349.9	19387.8	38863.1	10519.9	12542.7	27564.5	20346.3	22387.4	15540.2	10538.9	13672.2	12132.7	14159.7	17445.4	10376	7480.52	4538.63	21903	9427.03	14976.7	4799.87	14001.5	23427.8	14769.2	10396.5	6247.47	15354.4	7264.49	13770.3	6349.48	15621.1	10882.4	13445.3	12171.3	11631.8	3834.68	14194.9	29599.9	21136.2	4199.07
8.8776	12466.1	18031.8	37770.7	10638.6	12916.1	27247.2	19014.6	22128.7	15672.8	10618.7	12779.7	12359.2	13555	17230.3	10638.3	7507.88	3993.59	21981.7	10116.5	14841.6	4749.24	13860.3	23930.7	14033.5	10371.2	6544.59	14735.3	7067.28	14212.3	6575.21	16279.1	10844.6	9811.03	10741.7	11479.7	3829.47	12772.4	29603.9	18956.4	4174.8
8.9424	12518.3	17119.1	36846.8	10708	13260.1	27144.8	17361.7	21789.9	16147.3	10752.4	12160.4	12588.7	13276	17090.9	10918.3	7466.51	3530.51	22267.6	10864.8	14673.3	4541.93	13954.4	24080.1	13400.1	10405.4	6835.7	14020.7	6908.19	14546.6	6756.7	16827	10678.2	7332.25	9436.3	11480.3	4065.8	11359	29235.8	17412.8	4172.8
9.0072	12261.8	16871.9	35763.5	10696.5	13600.9	27124	15405.3	21236.1	17015	11020.9	11774.5	12789.3	13297.7	17039.7	10981.2	7563.12	3240.11	22628.1	11291.3	14429.8	4286.86	14313.8	23654.1	12933.3	10533.9	7022.65	13417.4	6963.08	14617.1	6810.35	16886.7	10373.5	5687.31	8347.58	11819.2	4371.14	10173.6	28334.9	16653.6	4225.21
9.072	11912	16801.2	34632.6	10573.3	13910.7	26920.3	13399.5	20764.8	17832.3	11470.1	11272	12913	13348.5	17122.2	10623.1	7822.81	3076.03	22689.7	11267.9	14203.9	4146.37	14838.5	22592.1	12495.2	10719.2	6925.89	13003.2	7192.38	14489	6804.27	16415.7	9825.25	4501.3	7567.87	12185.2	4596.25	9128.68	27215.8	16204.5	4344.66
9.1368	11607	16578	33052.4	10356.3	14179.5	26495.9	11730.3	20281.9	18074.4	12075.8	10659.5	13021.1	13420.8	17336.9	9908.73	8034.11	2924.2	22486.1	10982.3	14173.5	4201.78	15186.7	21489.5	12096.3	10968.1	6493.08	12929.5	7478.08	14410.9	6811.13	15594.5	9048.53	3613.53	7024.06	12188	4774	8019.18	25998.9	15572.8	4448.4
9.2016	11401.5	16162.3	30671	10110.4	14437	25719.6	10625.8	19688.7	17574.2	12398.5	10090.9	13227.4	13736.8	17425.7	9123.18	8107.26	2769.44	22416.3	10678	14245.9	4358.75	15073.3	20810.2	11698.3	11222.5	5938.09	13019.1	7852.45	14571.6	6869.78	14497.2	8176.86	4058.25	6561.99	11638.8	4988.45	6863.17	24516.3	14541.6	4408.08
9.2664	11434.2	15710.1	27685.9	9817.93	14793.6	24644.6	10047.7	19132.3	16787.5	12351.2	9802.37	13319.1	14216	17318.2	8319.4	7916.6	2549.95	22718.4	10586.1	14168.8	4516.56	14553.1	20912.7	11208.4	11299.4	5607.48	12833.7	8290.35	15153.7	6801.42	13323.7	7464.99	3673.68	6112.45	10935.6	5073.88	5811.91	22488	13062.2	4279.42
9.3312	11518.1	15104.7	24832.7	9575.34	15359.7	23819.4	9915.99	18682.7	16113.6	12318.4	9706.14	13238.8	14418.2	17256.9	7450.43	7718.62	2269.49	23047.1	10685.3	13984	4676.11	13842.4	21790.6	10679.5	11039.5	5632.97	12059.2	8683.48	15897.6	6594.52	12511	7109.99	4361.64	5804.75	10553.7	4980.5	4964.81	19842.4	11413.4	4215.3
9.396	11509.3	14283.2	22605.9	9435.38	15780.6	23541.7	9762.96	18341.5	15491.3	12347.1	9524.19	13045.7	14348.2	17281.9	6463.17	7582.27	1964.59	22978.8	10968.8	13822.7	4854.27	13210.3	23037.8	10335.3	10483.2	5835.41	10975.9	8756.82	16191.4	6469.36	12063.4	7054.18	4119.25	5661.68	10539.8	4816.46	4246.58	16992.2	9823.48	4185.18
9.4608	11390.7	13480.7	21001.8	9440.25	15815.1	23772.8	9236.47	17925.3	14712.4	12432.1	9050.77	12926.5	14136.8	17147.5	5549.77	7484.8	1668.38	22421.9	11308.3	13652.7	5082.8	12829.2	24002.9	10204.9	9737.86	5887.88	9946.5	8405.33	15874.4	6530.83	11545.2	7159.12	3836.2	5546.56	10687.6	4741.41	3612.92	14706.9	8493.48	4225.99
9.5256	11133.2	12805.1	19948	9581.07	15655	24497.5	8345.52	17338.9	14025.4	12556.2	8524.76	12969	14182.8	16847.6	4916.34	7539.27	1394.18	21585.8	11601.3	13384.1	5345.55	12600.3	24324.8	10242.5	9181.2	5605.85	9155.22	7828.34	15242.5	6716.18	10649.5	7319.78	3663.27	5359.28	10746	4703.2	3097.19	13445.4	7606.11	4352.32
9.5904	10842.6	12357.6	19095.4	9725.5	15595.5	25505.5	7291.52	16577.8	13599.4	12708.5	8106.94	13060.5	14390.2	16651.7	4529.54	7833.97	1211.32	20683.9	11876.9	13070.4	5646.64	12364.5	24151.9	10220.3	8966.1	5159.61	8568.31	7409.8	14565.4	6823.24	9326.44	7387.42	3616.15	5006.68	10881.1	4621.57	2753.69	12778	7005.77	4390.88
9.6552	10629	12181	18318.3	9718.39	15692.4	26565.1	6286.61	15815.2	13630.2	12812.2	7810.98	13206.7	14552.2	16408.2	4200.48	8210.1	1150.26	19926.3	12103.2	12746	6022.7	12205.6	23853.1	10212.2	9037.28	4668.41	7969.8	7438.98	13833.3	6844.02	7950.32	7290.75	3641.61	4544.65	11152	4570.54	2586.32	12209.7	6442.16	4239.66
9.72	10306	11794.5	17539.2	9595.38	15769.4	27493.5	5430.33	15135.4	14089.6	12709.7	7583.96	13333	14446.6	15743.2	3834.46	8440.01	1233.33	19391	12145.2	12410.2	6506.91	12341.4	23531.7	10227	9196.37	4253.53	7162.45	7898.77	13413.2	6823.36	6749.83	6963.29	3761.29	4179.77	11241	4608.52	2510.83	11507.9	5908.81	4051.81
9.7848	9745.51	11338.6	16789.1	9413.2	15796.1	27820.2	4763.58	14684.8	14842.6	12621.1	7460.66	13323.6	13936.9	14863.5	3365.88	8424.15	1411.82	19011	11915.9	12038.1	7000.36	12446.5	22812.3	10051.3	9188.67	3972.77	6159.93	8431.54	13499.2	6764.26	5847.8	6593.23	3831.46	3953.46	11048.6	4626.04	2513.55	10636.4	5498.02	3859.43
9.8496	9117.8	10819	16085.1	9216.61	15621.2	27677.1	4357.71	14433.9	15786.3	12684.8	7527.69	13177.1	13337.5	14301.4	2812.38	8277.93	1502.14	18651.3	11368.6	11890.6	7327.33	12164.3	21497.3	9591.47	9059.79	3817.01	5314	8750.24	13895.3	6628.14	5145.33	6341.1	3872.08	3751.24	10685.7	4587.84	2578.62	9617.01	5303.39	3652.98
9.9144	8689.73	10556.2	15315.1	9191.49	15292.4	27056.5	4009.34	14355.7	16794.7	12754.6	7803.01	13002.1	12646.3	14060.3	2353.01	8183.41	1590.76	18195.7	10750.9	12084.9	7477.62	11684.1	19697	8896.55	8938.57	3808.63	4783.42	8829.75	14363.3	6386.96	4549.01	6196.91	3891.39	3508.98	10485.6	4457.63	2713.46	8477.22	5305	3515.5
9.9792	8596.83	10683.7	14713.4	9281.85	14690.8	26178.3	3723.23	14226.6	17726.5	12665.1	8259.8	12949	11772.4	13782.6	2077.57	8353.68	1604.12	17514.5	10247.4	12235	7629.76	11638.6	17398.3	8202.68	8820.2	3792.52	4353.11	8735.85	14588.1	6087.9	4076.01	6062.01	3930.06	3324.4	10496	4365.08	2873.84	7385.63	5350.82	3469.77
10.044	8691.01	10916.4	14386.3	9350.01	14038.6	25354.6	3555.66	13828.6	18367.4	12329	8661.88	13007.2	10741.5	13354.3	1979.3	8450.41	1560.13	16774.2	9886.98	12113.8	7774.09	12573.5	14889.5	7746.65	8655.16	3653.61	4041.47	8568.68	14516.4	5780.74	3845.69	5873.94	3982.23	3235.81	10571.4	4423.1	3003.62	6466.58	5314.2	3412.27
10.1088	8805.6	10974.5	14244.4	9295.44	13576.1	24737.7	3433.24	13215.8	18486.3	11769.1	8849.1	13131.2	9879.76	12957	1956.08	8427.08	1523.86	16076.5	9502.95	11831.3	7832.17	14157.9	12329.3	7388.54	8287.32	3397.55	3922.52	8421.14	14167.6	5493.85	3756.94	5532.15	4017.46	3139.61	10537.3	4671.85	2979.07	5672.73	5122.67	3340.24
10.1736	8686.64	10872.5	13804.5	9089.5	13222.5	24170.3	3254.39	12463	18164.3	11109.2	8782.83	13209.7	9358.67	12485.7	1838.91	8226.62	1579.54	15349.1	9027.57	11626.4	7691.36	15299.5	9973.98	7048.37	7736.52	3144.3	3933.01	8298.67	13856	5316.82	3763.86	5223.31	4058.13	3018.66	10371.7	4992.35	2973.19	5015.57	4833.75	3284.83
10.2384	8071.91	10563.6	12850.1	8826.65	13000	23406.4	3114.18	11612.9	17766.3	10390.8	8387.07	13175.8	9228.07	11870.6	1665.88	7908.72	1671.6	14494.6	8570.86	11522	7365.78	15251.3	8239.76	6693.22	7191.96	3005.03	3896.6	8240.33	13857.1	5278.87	3704.44	5114.37	4094.88	2915.36	10188.4	5216.62	3083.56	4613.53	4514.94	3229.89
10.3032	7192.67	10084.8	11738	8564.78	12735.5	22615.6	3156.58	10835.8	17382.8	9758.59	7769.87	12978	9389.34	11275.8	1497.75	7638.21	1704.66	13668.5	7968.32	11266.6	6986.32	14126.6	7080.1	6244.9	6802.8	2924.47	3719.04	8304.84	14003.6	5280.01	3562.56	5092.14	4176.11	2852.14	10168	5226.33	3269.1	4402.46	4244.58	3141.79
10.368	6585.55	9643.27	11036.5	8410.25	12370.7	21738.7	3149.55	10124.4	16798.8	9286.04	6824.18	12698.7	9710.53	10674	1364.25	7532.38	1780.11	13076.7	7140.4	10797	6750.34	12808.1	6346.24	5766.02	6589.96	2892.93	3370.71	8573.79	13901.3	5226.53	3269.68	4739.16	4158.59	2898.28	10396.6	5041.94	3494.74	4281.09	3969.15	3060.17
10.4328	6278.3	9331.06	10909.4	8356.2	11894.4	21093.9	2900.09	9413.42	16023.2	9090.79	5901.41	12426.5	9992.71	10051.3	1252.19	7591.14	1808.9	12537.1	6193.13	10463.6	6807.59	12065.3	5862.35	5316.23	6516.79	2970.84	3089.5	8916.43	13524.4	5170.91	2883.17	3961.08	4111.09	3028.4	10733.5	4856.08	3673.99	4242.33	3660.27	2933.23
10.4976	6160.14	9257.15	11034.4	8369.39	11378.3	20542.4	2600.01	8663.7	15044.8	9048.69	5386.77	12105.9	9979.48	9554.05	1213.35	7769.9	1787.36	11712.3	5367	10275	7131.83	11907.2	5427.34	4910.19	6532.98	3082.06	3128.42	9035.97	12870.6	5233.76	2551.09	3148.76	4035.72	3095.05	10797.7	4771.28	3632.95	4127.66	3413.13	2713.33
10.5624	6140.58	9167.65	10837	8357.56	10869.4	20079.8	2429.84	7867.12	13825.7	9090.78	5201.95	11768.1	9567.46	9305.4	1141.29	8206.07	1741.06	10739.9	4693.68	10001	7465.76	12082.4	5086.42	4615.54	6643.97	3092.18	3359.15	8680.32	12150.8	5382.36	2393.07	2645.06	3965.73	3054.99	10460.4	4803.12	3331.24	3945.76	3279.54	2434.12
10.6272	6152.36	8965.41	10339.5	8326.25	10566.7	19533.6	2267.79	8097.36	12549.6	9198.13	5080.47	11517.9	9034.01	9382.57	1008.33	8795.07	1781.21	9853.45	4145.26	9681.58	7615.16	12249.6	4805.53	4490.81	6705.4	2931.56	3600.28	7937.16	11462.1	5625.24	2401.78	2502.91	3967.7	3012.02	9974.57	4906.73	2997	3775.24	3329.85	2241.88
10.692	6372.16	8737.73	9703.47	8265.84	10495.4	18776.9	2065	8408.22	11701.6	9409.57	4855.83	11337.6	8559.44	9616.23	889.277	9364.25	1824.57	9092.64	3735.81	9252.38	7631.97	12408.7	4225.47	4482.85	6589.77	2594.3	3690.16	7242.66	10912.6	5849.9	2458.43	2604.45	3948.97	3062.48	9507.04	4930.52	2813.83	3595.39	3471.15	2200.79
10.7568	6750.6	8782.67	9202.08	8279.39	10544.9	18089.8	2041.95	7877.3	11175.5	9463.07	4497.91	11181.8	8211.97	9751.79	782.841	9855.5	1766.36	8404.8	3532.48	8665.68	7613.85	12627.9	3404.87	4585.04	6198.92	2218.04	3588.08	6744.41	10312.6	5788.35	2452.78	2759.09	3861.59	3135.41	9085	4636.56	2696.41	3365.52	3566.32	2169.96
10.8216	6975.73	9048.56	8773.38	8324.32	10475.3	17385	2127.42	7579.26	10640.2	9098.92	4133.74	11109.4	8047.27	9649.94	703.914	10069.3	1596.04	7836.55	3456.29	8104.6	7617.06	12836.3	3580.33	4828.11	5557.62	1985.1	3294.16	6370.69	9499.96	5423.51	2370	2934.13	3761.86	3075.37	8762.17	4094.13	2548.3	3212.7	3584.5	2142.26
10.8864	6836.27	9296.32	8232.22	8285.89	10390.2	16726.5	2237.65	8337.25	10020.2	8559.18	3758.34	11142.7	8049.36	9315.67	699.977	10015	1400.59	7312.19	3495.79	7608.47	7692.26	12998.8	3028.49	5117.81	4845.38	1908.16	2871.64	5960.99	8522.86	5053.38	2300.61	3058.95	3719.46	2916.92	8569.4	3548.43	2460.31	3142.41	3585.2	2097.91
10.9512	6467.74	9372.15	7739.17	8061.64	10307.2	15866.1	2281.63	8095.65	9341.37	8300.13	4302.04	11232.9	8072.47	8834.71	715.044	9819.33	1269.32	6753.03	3529.68	6980.03	7854.79	13172	3739.76	5300.8	4239.76	1977.3	2518.43	5517.66	7555.64	4809.76	2241.84	3147.2	3736.58	2734.97	8529.9	3154.24	2398.62	3040.05	3611.78	2078.22
11.016	6010.86	9385.75	7608.84	7789.84	9934.64	14781.3	2317.45	8011.48	8591.75	8409.87	3783.2	11276.4	8036.21	8466.79	688.465	9506.25	1191.37	6095.53	3493.59	6191.09	8047.51	13346.5	3544.99	5276.26	3742.03	2085.84	2303.25	5161.53	6709.56	4692.84	2140.46	3099.86	3712.85	2646.3	8691.69	3054.67	2456	2983.43	3578.01	2114.21
11.0808	5643.72	9436.52	6927.45	7685.07	9120.41	13885.9	2442.16	8088.88	7945.54	8697.77	4392.95	11257.8	7978.01	8251.15	731.696	9121.67	1139.98	5396.52	3400.91	5513.61	8021.03	13404.3	3221.09	5039.62	3246.51	2081.45	2152.23	5009.38	6106.86	4598.39	1956.77	2853.29	3663.58	2710.78	8776.11	3153.59	2470.52	3017.03	3435.65	2074.4
11.1456	5320.01	9645.04	6577.66	7708.01	8095.88	13295.1	2576.19	8242.23	7498.02	8961.73	4322.07	11318.9	7879.31	7830.86	758.581	8769.67	1061.84	4758.1	3444.47	5226.59	7728.09	13346.3	2998.19	4884.4	2733.56	2007.9	2178.33	5107.05	5650.7	4401.47	1731.54	2518.54	3623.4	2886.81	8694.5	3098.49	2265.04	3008.23	3213.06	1923.55
11.2104	5026.44	10072.1	6419.45	7697.51	6991.77	12961.6	2686.84	8315.53	7290.57	9352.71	4468.96	11536.2	7821.02	7154.33	773.289	8417.87	1034.33	4165.36	3639.12	5356.88	7353.44	13072	2895.7	4912.32	2314.07	1968.27	2582.61	5351.06	5266.89	4197.28	1560.12	2179.92	3603.5	3023.05	8547.61	2822.71	1911.55	2927.87	2991.25	1738.25
11.2752	4824.71	10714.7	6087.54	7507.88	6121.91	12492.7	2880.37	8227.51	7215.89	9805.92	4567.83	11935.2	7912.3	6436.03	761.709	8225.78	1057.39	3604.63	3850.73	5724.52	7021.52	12552.7	2897.4	4892.15	2084.21	1999.94	3219.19	5631.95	5015.29	4086.44	1476.41	1896.59	3581.4	3040.94	8486.56	2607.92	1570.22	2868.42	2817.23	1632.53
11.34	4799.25	11431.5	5695.26	7123.33	5646.48	12102.7	3057.28	7908.13	6932.88	10085.9	4443.28	12459.8	8237.58	5838.94	713.175	7983.17	1028.06	3159.79	3935.1	5986.31	6849	11961.1	3009.28	4834.69	1968.77	2078.45	3703.79	5810.16	4839.14	4155.47	1422.8	1744.28	3576.4	3096.27	8558.47	2587.55	1340.35	2834.32	2696.77	1655.31
11.4048	4888.92	11925.8	5851.07	6682	5479.62	11619.6	3046.39	8426.64	6242.29	10040.4	4202.2	11959.9	8660.8	5459.45	686.907	7570.29	960.682	2796.1	3841.86	5994.24	6845.99	11415.2	3116.78	4801.34	1918.78	2176.05	3640.6	5775.29	4691.4	4260.91	1396.08	1783.9	3583.52	3268.94	8624.54	2776.57	1273.2	2773.81	2632.42	1620.55
11.4696	4766.45	12240.2	5547.88	6244.28	5514.47	11167.5	2847.22	8028.3	6100.22	9647.44	4039.53	12363.7	8959.45	5379.6	665.738	7115.13	939.447	2546.61	3668.09	5929.04	6994.75	10844	3214.01	4732.34	1898.88	2269.34	3066.57	5518.85	4481.06	4124.89	1422.59	2035.68	3583.23	3343.54	8523.95	2921.35	1294.2	2748.88	2564.96	1499.43
11.5344	4337.75	12420.7	5663.78	5869.81	5551.83	10948.4	2568.5	7920.01	6024.79	9107.85	3919.67	11751.6	9059.83	5507.98	713.803	6507.24	994.268	2531.75	3506.49	5886.32	7256.67	10358.6	3310.07	4566.22	1951.68	2295.68	2454.8	5206.09	4178.34	3721.21	1449.39	2356.72	3609.07	3212.62	8239.08	2937.84	1289.03	2718.3	2415.43	1367.33
11.5992	3851.23	12366.9	5474.86	5620.82	5734.73	11009.5	2377.44	8147.75	6272.09	8496.92	3828.17	12192.8	9278.75	5578.34	778.53	5781.25	1058.54	2778.19	3433.3	5690.1	7509.34	10049.5	3311.24	4272.11	2088.12	2266.82	2103.85	4929.16	3974.97	3208.95	1494.77	2699.43	3627.54	2961.72	8006.77	2956.98	1248.05	2645.28	2174.45	1337.21
11.664	3435.94	12027.2	5218.21	5469.79	6069.32	11240.2	2162.17	8448.93	5850.29	7885.91	3873.12	12648.1	9744.48	5493.21	785.289	5148.28	1090.57	3161.02	3436.13	5342.44	7760.95	9987.16	3236.34	3908.01	2258.39	2184.27	1890	4665.83	3775.58	2804.7	1608.5	2956.51	3647.64	2736.29	8021.81	3088.89	1164.28	2594.71	1938.16	1431.83
11.7288	3230.48	11654.2	5084.02	5416.55	6368.83	11269.3	1956.71	7511.74	6555.31	7353.16	4016.11	12033.5	10227	5380.02	791.987	4620.38	1184.62	3520.73	3474.33	4974.83	7989.45	10140.5	3117.38	3556.42	2366.08	2133.63	1685.91	4420.34	3583.4	2594.09	1789.79	3131.96	3657.41	2589.39	8118.11	3291.71	1052.97	2637.28	1833.12	1508.56
11.7936	3130.39	11263.9	5027.6	5387.18	6515.48	11118.6	1790.1	8300.66	6263.72	6921.99	4097.67	12349	10545.7	5371.85	819.925	4101.79	1278.47	3758.04	3397.11	4717.98	8091.98	10474.8	2973.4	3261.49	2370.11	2197.28	1525.36	4122.77	3544.23	2498.8	2018.35	3256.48	3651.65	2557.85	8135.43	3352.78	905.859	2663.07	1852.66	1470.06
11.8584	3056.54	10761.8	4863.11	5295.23	6504.03	10931.3	1635.64	7886.78	6011.1	6650.29	4187.26	12611	10481.9	5363.79	776.864	3605.73	1346.94	3942.56	3131.3	4652.09	8042.59	10889.4	2835.03	2938.29	2287.15	2280.54	1386.95	3879.27	3594.78	2366.79	2261.42	3341.64	3627.38	2622.92	7985.43	3132.17	744.219	2704.05	1859.57	1311.66
11.9232	2853.45	10234.1	4648.57	5078.39	6406.98	10965.4	1581.05	8459.65	5776.21	6464.61	4370.06	11860.2	9950.73	5314.49	757.108	3312.78	1306.17	4124.31	2794.37	4687.99	7831.84	11292.2	2746.87	2486.53	2234.79	2337.95	1304.26	3776.42	3636.27	2155.77	2524.64	3401.97	3602.97	2637.16	7791.8	2751.24	627.308	2737.69	1774.16	1192.38
11.988	2544.76	9877.09	4490.84	4752.99	6224.41	11071.7	1545.53	8195.52	5654.46	6337.68	3562.13	12202.9	9101.8	5441.65	862.496	3198.13	1158.99	4230.41	2561.53	4603.33	7508.05	11569	2742.54	2121.52	2308.78	2403.91	1286.48	3911.48	3588.7	1888.96	2670.46	3460.38	3574.03	2476.21	7612.38	2484.25	653.207	2770.1	1691.42	1130.49
																																						1
[truncated: 1 more columns]

## Sheet: Arrested (emb-30 RNAi)
Measurements of ASPM-1 intensity across Metaphase I-arrested spindles; minus auxin images are at the top and plus auxin images are below
Distance	070620_Emb30 0minAux_01	070620_Emb30 0minAux_02	070620_Emb30 0minAux_09	070620_Emb30 0minAux_10	070620_Emb30 0minAux_11	070620_Emb30 0minAux_15	070620_Emb30 0minAux_17	070620_Emb30 0minAux_22	070620_Emb30 0minAux_33	072020_Emb30 0minAux_01	072020_Emb30 0minAux_02	072020_Emb30 0minAux_03	072020_Emb30 0minAux_05	072020_Emb30 0minAux_06	072020_Emb30 0minAux_07	072020_Emb30 0minAux_08	072020_Emb30 0minAux_09	072020_Emb30 0minAux_11	072020_Emb30 0minAux_15	072020_Emb30 0minAux_16	072020_Emb30 0minAux_18	072020_Emb30 0minAux_22	072020_Emb30 0minAux_23	072020_Emb30 0minAux_24	072020_Emb30 0minAux_27	072020_Emb30 0minAux_30	072020_Emb30 0minAux_32	072020_Emb30 0minAux_33	072020_Emb30 0minAux_35	072020_Emb30 0minAux_39	072020_Emb30 0minAux_40	072020_Emb30 0minAux_41	072020_Emb30 0minAux_44	072020_Emb30 0minAux_46	072020_Emb30 0minAux_47										Distance	Average Value	Standard Error	Std Error Band ASPM-1
	No Auxin	No Auxin	No Auxin	No Auxin	No Auxin	No Auxin	No Auxin	No Auxin	No Auxin	No Auxin	No Auxin	No Auxin	No Auxin	No Auxin	No Auxin	No Auxin	No Auxin	No Auxin	No Auxin	No Auxin	No Auxin	No Auxin	No Auxin	No Auxin	No Auxin	No Auxin	No Auxin	No Auxin	No Auxin	No Auxin	No Auxin	No Auxin	No Auxin	No Auxin	No Auxin										(n=35)	No Auxin	No Auxin	No Auxin Top	No Auxin Bot
	Raw Intensity	Raw Intensity	Raw Intensity	Raw Intensity	Raw Intensity	Raw Intensity	Raw Intensity	Raw Intensity	Raw Intensity	Raw Intensity	Raw Intensity	Raw Intensity	Raw Intensity	Raw Intensity	Raw Intensity	Raw Intensity	Raw Intensity	Raw Intensity	Raw Intensity	Raw Intensity	Raw Intensity	Raw Intensity	Raw Intensity	Raw Intensity	Raw Intensity	Raw Intensity	Raw Intensity	Raw Intensity	Raw Intensity	Raw Intensity	Raw Intensity	Raw Intensity	Raw Intensity	Raw Intensity	Raw Intensity											Raw Intensity	Raw Intensity	Raw Intensity	Raw Intensity
0	1983.32	2244.53	3128.82	5226.51	1051.24	2306.57	2414.22	6642.78	5146.57	865.958	1842.32	315.397	384.946	1035.63	2092.86	1239.69	287.61	517.964	2065.22	2065.41	9301.98	481.345	2252.09	3106.54	817.977	1507.51	4225.19	674.332	1683.31	1072.39	1201.09	1239.34	3686.06	1144.49	2279.54										0	2215.16	327.005	2542.17	1888.16
0.0648	2148.89	2539.56	3000.64	4677.64	1075.18	2852.3	2459.56	6387.97	5163.49	907.89	1801.02	263	397.047	1194.36	1942.9	1320.46	299.615	471.339	2165.83	1783.46	9212.22	471.632	2243.9	3079.06	686.912	1586.6	4150.27	684.082	1651.71	1052.61	1190.53	1298.59	3861.66	1116.98	2334.27										0.0648	2213.52	319.57	2533.09	1893.95
0.1296	2504.84	2809.3	3014.38	4067.13	1040.28	3508.34	2672.08	6136.34	5318.47	921.028	1823.3	236.811	396.425	1289.72	1927.2	1235.42	376.873	440.549	2261.55	1638.29	9155.29	441.353	2263.05	2846.24	565.045	1590.73	4033.33	657.098	1666.84	1097.77	1144.37	1428.15	4019.5	1079.93	2374.24										0.1296	2228.04	316.259	2544.29	1911.78
0.1944	2906.17	2899.91	3060.41	3597.57	957.533	4185.66	2947.65	5943.44	5589.93	894.208	1868.31	281.653	410.518	1271.9	2106.95	1031.94	451.05	418.247	2252.34	1549.89	9172.52	424.179	2355.15	2524.67	526.837	1522.99	3876.79	639.486	1712.08	1129.74	1033.87	1573.91	4129.85	1066.72	2355.51										0.1944	2247.7	319.29	2566.99	1928.41
0.2592	3295.62	2943.55	3150.71	3291.73	895.288	4680.77	3061.44	5685.63	6119.81	829.493	1929.31	334.044	406.937	1213.72	2302.95	919.586	502.323	440.478	2238.3	1474.15	9299.83	402.751	2463.73	2198.99	614.349	1467.63	3734.8	687.914	1716.86	1080.92	945.551	1671.8	4280.37	980.379	2262.56										0.2592	2272.12	328.116	2600.24	1944.01
0.324	3510.97	2963.54	3421.96	3224.61	898.014	4681.34	3046.97	5379.63	6939.83	737.066	1988.59	370.149	393.189	1227.95	2316.59	998.949	547.868	549.09	2232.73	1388.98	9510.25	400.892	2492.34	1962.24	740.578	1481.95	3586.25	728.521	1738.83	1023.29	926.93	1662.79	4372.79	840.991	2169.58										0.324	2298.75	338.792	2637.54	1959.96
0.3888	3510.12	2985.09	4012.51	3438.41	921.644	4294.42	3006.1	5167.83	8120.66	701.925	2054.32	376.305	412.771	1306.9	2181.14	1151.49	520.521	692.958	2153.99	1324.63	9656.26	438.629	2372.52	1871.93	804.911	1551.32	3494.1	758.472	1833.07	1005.15	920.534	1563.3	4384.59	758.479	2110.07										0.3888	2338.77	353.817	2692.59	1984.96
0.4536	3405.14	2921.79	4760.29	3982.15	996.852	3872.45	2896.43	5064.47	9473.11	742.044	2116.07	391.179	442.615	1436.13	2050.51	1228.12	431.953	760.642	2005.19	1373.53	9658.76	529.967	2217.67	1899.7	865.843	1691.26	3527.23	784.719	1995.61	965.258	902.103	1500.92	4456.98	726.24	2186.49										0.4536	2407.41	374.968	2782.38	2032.44
0.5184	3272.83	2748.33	5431.01	4692.71	1142.96	3436.07	2882.29	5182.88	10543.2	809.003	2192.71	423.734	460.266	1582.79	1989.7	1179.26	412.109	700.309	1990.57	1548.11	9535.87	657.167	2139.85	2021.31	1028.96	1894.07	3703.5	840.7	2178.97	927.956	909.263	1519.55	4599.37	727.264	2385.41										0.5184	2505.43	394.785	2900.22	2110.65
0.5832	3223.24	2611.43	6041.45	5174.81	1253.53	3012.05	2908.57	5503.62	10794.2	871.754	2204.95	467.448	486.836	1745.07	2017.15	1039.71	518.443	572.307	2084.35	1789.68	9310.72	836.082	2173.26	2165.74	1279.33	2145	3894.01	889.479	2250.68	941.188	948.041	1576.3	4754.4	721.652	2656.89										0.5832	2596.1	401.086	2997.18	2195.01
0.648	3177.23	2662.76	6705.99	5308.48	1294.46	2670.9	2992.07	5906.77	10030.8	998.913	2117.5	476.222	502.026	1836.87	2082.46	904.035	666.021	471.38	2190.57	2052.07	9105.94	964.857	2273.56	2233.63	1564.03	2389.79	4004.9	909.199	2164.22	1036.91	1031.02	1622.18	4841.83	716.712	2994.57										0.648	2654.31	391.709	3046.02	2262.6
0.7128	3030.31	2865.09	7301.6	5210.1	1284.9	2524.43	3066.92	6322.77	9026.49	1124.41	2029.03	463.293	501.899	1926.82	2082.45	870.789	698.068	466.077	2330.9	2227.09	9012.83	959.19	2405.19	2276.88	1740.5	2515.27	4072.4	986.742	1986.33	1181.61	1092.94	1609.01	4851.33	712.071	3386.14										0.7128	2689.77	382.314	3072.08	2307.45
0.7776	2771.28	3069.27	7964.81	5171.89	1317.93	2635.85	3078.04	6670.34	8472.58	1142.96	2021.94	456.867	548.107	2076.67	2084.64	931.177	684.82	497.479	2535.69	2279.41	9067.77	862.015	2554.82	2333.92	1775.12	2539.64	4098.43	1087.4	1848.72	1391.83	1113.82	1560.24	4766.24	719.648	3842.91										0.7776	2742.12	384.442	3126.56	2357.68
0.8424	2485.15	3419.97	8786.77	5155.76	1433.61	2822.01	3126.42	6666.21	8363.76	1117.91	2087.94	455.074	599.696	2249.23	2099.01	1019.2	719.682	559.417	2718.43	2299.63	9222.15	783.628	2723.08	2482.8	1741.79	2628.18	4021.04	1215.71	1866.34	1580.91	1194.29	1477.32	4662.74	740.759	4370.54										0.8424	2825.6	393.652	3219.26	2431.95
0.9072	2240.93	3778.84	9916.54	5190.67	1552.58	3194.47	3306.59	6298.61	8344.16	1144.23	2146.4	500.264	615.675	2327.7	2029.91	1120.48	769.382	642.269	2816.42	2320.12	9423.66	765.596	2823.77	2645.88	1699.52	2891.64	3871.36	1288.15	2022.54	1652.74	1306.11	1467.49	4673.51	768.49	4891.5										0.9072	2927.09	408.436	3335.53	2518.65
0.972	2117.6	3984.33	11628.5	5320.33	1668.87	3813.25	3814.14	5746.04	8355.28	1208.97	2176.41	580.876	609.256	2272.2	1896.26	1230.16	765.048	738.417	2836.98	2420.35	9619.86	807.344	2825.8	2740.94	1716.41	3295.95	3691.94	1321.65	2255.47	1680.17	1416.7	1502.24	4872.59	802.181	5236.27										0.972	3056.25	435.54	3491.79	2620.71
1.0368	2125.63	4094.86	14013.1	5647.82	1849.83	4668.29	4608.77	5308.98	8330.27	1298.96	2241.57	626.632	609.778	2123.07	1781.98	1288.46	756.648	849.713	2919.09	2454.3	9807	827.589	2836.85	2820.89	1832.78	3837.95	3485.06	1395.91	2413.2	1737.17	1615.71	1526.94	5197.29	843.26	5375.23										1.0368	3232.87	481.5	3714.37	2751.37
1.1016	2226.62	4325.98	16857.5	6044.14	2053.51	5767.5	5513.84	5214.82	8344.98	1325.2	2346.49	686.442	622.84	1956.18	1728.02	1283.31	859.54	935.078	3083.14	2473.98	9953.17	789.279	2802.68	2900.78	2005.37	4587.49	3331.15	1489.93	2476.02	1939.59	1874.82	1512.26	5442.22	853.414	5372.23										1.1016	3456.56	545.406	4001.96	2911.15
1.1664	2332.65	4794.96	19810.5	6323.02	2117.6	7163.07	6574.75	5407.53	8727.89	1355.47	2359.2	779.322	677.521	1837.8	1747.75	1221.65	1087.81	993.275	3269.34	2562.28	9948.01	696.667	2665.99	2972.52	2234.95	5440.78	3288.8	1542.58	2518.96	2174.68	2110.11	1452.3	5558.38	864.444	5266.27										1.1664	3710.83	621.307	4332.13	3089.52
1.2312	2384.09	5458.4	22500.5	6571.78	2131.11	8963	7666.05	5811.36	9348.67	1414.28	2285.7	847.676	836.285	1739.65	1788.6	1198.79	1348.15	990.941	3375.47	2712.2	9812.85	615.443	2534.34	2983.75	2435.26	6320.63	3316.74	1587.83	2647.8	2300.2	2263.61	1394.33	5708.56	896.605	5112.56										1.2312	3980.09	700.221	4680.31	3279.87
1.296	2428.31	6238.04	24522	6884.64	2207.53	11223.1	8562.43	6315.85	9894.24	1354.5	2238.91	851.984	1058.57	1675.79	1852.25	1242.26	1603.43	903.896	3432.87	2984.98	9689.02	575.078	2493.96	2972.65	2611.91	7296.48	3362.78	1666.02	2941.04	2326.66	2265.64	1301.15	5986.89	981.373	5233.8										1.296	4262.29	771.703	5033.99	3490.58
1.3608	2567.49	7084.64	25530	7298.23	2289.75	13749.5	9169.54	6869.48	10395.3	1259.94	2232.17	817.463	1260.34	1688.06	2000.79	1387.96	1739.58	743.988	3522.02	3274.61	9635.69	599.816	2527.43	2979.6	2678.71	8510.42	3439.51	1767.33	3361.37	2376.11	2219.2	1186.27	6397.92	1121.8	5854.09										1.3608	4558.18	827.744	5385.92	3730.43
1.4256	2763.13	8014.44	25836.1	7741.41	2421.24	15603.5	9536.92	7265.55	11112.5	1329.73	2268.63	850.263	1418.91	1739.51	2234.21	1572.88	1710.99	665.757	3703.56	3558.73	9656.81	611.25	2572.55	3151.99	2493.69	9900.21	3570.5	1903.73	3738.63	2462.96	2268.41	1143.03	7027.36	1273.19	6945.82										1.4256	4859.09	867.677	5726.76	3991.41
1.4904	3030.49	8948.11	26210.6	8363.2	2469.43	16449.5	9849.98	7978.82	12556	1474.96	2254.59	961.733	1492.78	1883.14	2464.15	1694.24	1637.58	707.895	4020.85	3944.13	9736.29	593.28	2662.16	3440.54	2224.45	11412.6	3697.96	1988.41	3899.81	2592.96	2423.55	1193.46	7948.61	1445.6	8445.92										1.4904	5202.79	909.488	6112.28	4293.3
1.5552	3365.68	9992.92	26883.6	9266.96	2356.81	16777	10262	9115.05	14942.8	1660.23	2278.53	1077.86	1542.73	2199.34	2613.2	1816.74	1610.05	767.602	4373.37	4400.92	9837.32	597.342	2823.1	3730.91	2099.56	13036.1	3763.6	2043.09	3937.42	2736.62	2620.95	1386.46	9017.09	1627.45	10516.1										1.5552	5630.76	967.961	6598.72	4662.8
1.62	3586.62	11747.2	27721.6	10437.1	2204.01	16996.3	10987.2	10337.4	18453.2	1878.21	2360.93	1179.26	1635.34	2689.73	2732.81	1914.99	1663.69	843.994	4719.19	4808.53	9943.92	644.408	2972.67	3949.09	2104.76	14841.1	3754.38	2154.61	3913.24	2992.55	2874.74	1740.67	10250.9	1840.78	13397.8										1.62	6179.22	1055.12	7234.35	5124.1
1.6848	3648.97	14636.5	28563.6	11726.2	2133.25	17345.9	12087.5	11594.5	22920.3	2177.94	2486.83	1270	1721.1	3245.98	2796.82	2031.16	1801.32	882.46	5042.27	5109.86	9990.13	728.332	3100.76	4010.15	2186.92	16891.9	3670.38	2301.9	3983.49	3438.19	3303.22	2342.06	11556.9	2059.33	16940.4										1.6848	6849.33	1176.66	8025.99	5672.67
1.7496	3549.7	18626.3	29585.5	12806.6	2215.3	17880.9	13659.3	12921.4	27519.3	2641.04	2675.69	1398.39	1790.19	3855.79	2772.33	2222.97	2069.88	947.979	5356.39	5371.51	9969.96	817.946	3150.02	3986.13	2329.94	19277	3531.43	2521.65	4203.15	4082.59	3979.18	3229.35	12807	2318.88	20867.3										1.7496	7626.8	1326.89	8953.69	6299.92
1.8144	3422.19	23468.4	31220.5	13643.9	2582.18	18731.7	15561	14942.1	31678.7	3359.2	2764.98	1587.3	1845.19	4419.88	2784.06	2455.59	2388.61	1071.71	5841.31	5698.82	9987.2	917.122	3256.66	3917.32	2557.1	21936.2	3388.3	2791.24	4563.86	4933.23	4845	4297.77	13996.4	2535.79	24591.9										1.8144	8513.78	1498.53	10012.3	7015.25
1.8792	3425.6	29191.3	33707.3	14560	3192.96	19926.8	17482.9	17730.8	35069.3	4300.28	2708.37	1903.22	1950.06	4998.75	2903.92	2677.29	2725.55	1190.5	6522.65	6170.04	10029.1	977.021	3669.27	3868.95	2795.77	24591	3174.83	3005.84	5095.02	5934.26	5855.26	5485	15089	2726.24	27543.3										1.8792	9490.78	1680.53	11171.3	7810.25
1.944	3695.79	35688.3	36850.7	15844.4	3861.21	21313.5	19189.9	20382.9	37989.4	5351.67	2545.12	2372.88	2071.3	5648.16	3158.29	2921.88	3079.44	1303.53	7453.66	6818.76	10021.2	1011.22	4305.56	3855.89	2929.25	26930	2962.47	3131.42	5758.95	7013.88	7062.76	6701.94	16014.3	3125.14	29787.8										1.944	10518.6	1866.69	12385.3	8651.96
2.0088	4296.15	42141	39961.2	17176.4	4454.54	22781.7	20513.2	22090.8	41041.3	6525.19	2348.22	2909.68	2204.23	6359.99	3550.45	3269.87	3351.34	1330.57	8698.46	7515.56	9951.96	1105.1	4936.24	3873.12	3020.39	28752.3	2936.18	3237.69	6516.87	8008.56	8275.2	7763.57	16700.6	3893.86	31618.8										2.0088	11517.4	2043.54	13561	9473.89
2.0736	5260.07	47396.9	42739.6	18399.4	5041.18	24200.2	21833.3	22797.2	43881.1	7902.54	2224.25	3533.93	2373.7	7131.67	4043.31	3886.22	3557.98	1310.21	10319.1	8208.64	9852.53	1291.87	5403.8	4012.82	3146.88	29904.9	3120.98	3389.73	7348.93	8824.58	9384.86	8409.82	17296.7	4970.51	33037.1										2.0736	12441	2186.02	14627.1	10255
2.1384	6498.27	50794.6	44818	19683.8	5885.11	25557	23548.5	23378.4	45729.6	9581.36	2217.52	4410.78	2610.95	7922.03	4741.05	4685.04	3807.66	1294.41	12404	9042.7	9824.26	1674.86	5693.95	4330.97	3308.21	30673.3	3410.41	3551.53	8215.2	9463	10420.8	8781.22	18078.5	6260.13	34299										2.1384	13331.3	2277.37	15608.7	11053.9
2.2032	7895.71	53015.3	46100.7	21245.8	7148.17	26753.9	25584.3	24627.5	46701.2	11578.3	2497.05	5692.7	2947.09	8694.65	5729.77	5655.77	4059.54	1303.51	14850	10060.2	9933.32	2346.89	6124.6	4724.71	3456.28	31415.1	3782	3732.52	9050.89	9874.91	11528.4	9225.69	19212.5	7775.31	35607.2										2.2032	14283.8	2330.9	16614.7	11952.9
2.268	9369.24	54794.4	46397.1	23021.1	8823.22	27809.1	27821.9	26794.8	47616.2	13738.5	3002.91	7349.67	3478.98	9554.07	7029.88	6811.98	4362.97	1314.39	17404.6	11072.3	10202.3	3311.01	6823.97	5214.87	3538.97	31958.6	4275	3932.18	9850.45	10259.3	12787	9969.07	20666.1	9666.93	36871.5										2.268	15339.9	2363.31	17703.2	12976.5
2.3328	11047.3	56071.5	46238.3	24437.4	10764.6	28702.8	29850.3	29950.6	49081.1	16365.3	3611.91	9225.37	4226.86	10509.7	8674.85	8162.91	4855.99	1346.88	20042.9	12095.5	10630.9	4584.4	7929.13	5879.49	3515.05	32040.9	4943.9	4171.13	10732	10616.3	14088.2	10901.7	22121.4	11758.9	37766.3										2.3328	16484.1	2381.42	18865.5	14102.6
2.3976	13007	56628	45825.1	25096.7	12652.1	29369.6	31449.7	33137.2	50844.4	19760.5	4350.6	11056.6	5120.6	11437.2	10687.7	9779.04	5542.02	1469.52	22899.9	13345.9	11263.2	6138.62	9625.42	6673.86	3394.26	31516.7	5652.91	4499.59	11853.4	11068.2	15373.3	11668.7	23229.7	13921	38075.5										2.3976	17640.4	2376.46	20016.9	15263.9
2.4624	15088.1	56896.7	45451.6	25090.6	14208.5	29763	32584.2	35431.8	51622.4	23694.4	5157.93	12762.8	6141.1	12124.8	13058.2	11790.8	6435.85	1728.12	26101	15120.1	12074.6	7859.91	11841.9	7439.26	3434.9	30695.3	6512.27	4934.18	13332.5	11578.8	16541.3	12073	24222	16114.2	38263.8										2.4624	18776.3	2347.15	21123.4	16429.1
2.5272	17207.7	56881	44807.1	24975.4	15304.1	29856.7	33580.7	36956.2	50726.9	27784.5	5899.1	14416.1	7415.36	12603.6	15863.3	14144.5	7439.01	2092.31	29918	17508.7	13076.5	9718.01	14584	8020.35	3716.75	29593.3	7699.39	5548.29	15139.7	12339.1	17589.4	12322.2	25076	18625.3	38591.1										2.5272	19914.9	2290.92	22205.8	17623.9
2.592	19185.8	56781	43488.2	25335.6	15883.2	29826.3	34487.2	38511.7	48990.5	31696.9	6416.84	16222.4	8943.28	13034.3	19094	16443.2	8465.04	2541.07	34503.4	20325.6	14369	11472.5	17955	8461.79	4243.59	28317	9146.84	6297.33	17124.3	13265.7	18782.4	12750.5	25498.9	21669	38997.7										2.592	21100.8	2232.73	23333.5	18868
2.6568	21140.2	56959.8	41738	26313.1	16326.8	29736.2	34931.8	40539.9	47771.1	35429.9	6683.02	18360.1	10674.5	13698.3	22360.8	18412.8	9551.68	3156.11	39404.1	22954.6	16111.3	13041.7	22084.4	9028.03	4912	27064.9	10714.3	7129.43	19141.7	14058	20237.2	13348.6	25274.2	25164.7	39263.3										2.6568	22363.3	2200.69	24564	20162.6
2.7216	23151.6	57140.5	39917.6	27335.6	17222.1	29747	34624.7	42921.3	47042.9	39219.6	6932.32	20816.5	12464.3	14570.3	25370	20352.6	10860.3	3953.05	43667.1	25034.3	18479.4	14449.4	27136.6	9904.15	5489.65	26034.1	12180.6	7933.15	21085.9	14442.7	21758	14045.7	24571.1	28795.6	39458.9										2.7216	23660.2	2191.28	25851.5	21469
2.7864	25138.8	56416.9	38186.4	27824	18602.2	30046.4	33991.9	44827.7	46175.7	43104.5	7386.98	23114.9	14172.6	15414.8	27981.5	22876.7	12668.1	4973.13	46415.2	26725.5	21576.3	16015.8	33182.9	11295.2	5878.04	25147.5	13252	8637.49	22707.6	14397.7	22991.7	14853.7	23591.4	32087.7	39342.8										2.7864	24885.8	2176.51	27062.3	22709.3
2.8512	26946.9	54217.3	36535	27602.2	20015.6	30655.9	33385.9	45662.6	45118.6	46684.6	8237.41	24832.5	15659.3	15921.2	30031.3	26480.9	14950.1	6490.67	47620.9	28528.9	25234.2	18052.2	40204.7	13113.6	6050.4	24193.1	14036.6	9145.01	23968.4	14031.3	23726.6	15721.1	22414.1	34636	38637.6										2.8512	25964.1	2147.21	28111.3	23816.9
2.916	28623	50600.8	35158	26835.5	20841.7	31218.7	32935.5	45606.1	44082.9	49480.5	9525.36	26033.4	17009.8	16145.1	31615.4	30949.9	17523.3	8749.96	47722.5	30488.6	29316	20585	47879.8	15287.7	6252.54	23102.8	14627	9580	24970.9	13410.1	23948.2	16450.8	21222.7	36535.4	37572.1										2.916	26911.1	2120.9	29032	24790.2
2.9808	30846.1	46024.9	33737.9	25858.2	21032.3	31435.4	32527.7	45383.5	42994.3	51506.4	11175.1	27127.9	18245.1	16438.1	32968.3	35398.4	20525.3	11872	47180	32392.7	33501.4	23343	54988.8	17611.4	6683.82	22052.9	15111.9	10009.5	25725.6	12716.7	23832.3	17005.2	20112.9	38145.1	36333.6										2.9808	27767	2111.12	29878.1	25655.8
3.0456	33514.6	41145.4	32412.3	25057.7	21031.1	31320.4	32061.5	45391.6	41281	52700.1	12926.3	28472	19166.8	16791.7	34306.7	39239.8	24177.3	15747.8	46170.5	34088.6	37596.7	26115.3	60097.5	19854.5	7454.52	21091.3	15719.7	10506.2	25915.9	11940.5	23695.5	17230.3	19196.5	39402	35150.9										3.0456	28513.4	2108.54	30622	26404.9
3.1104	35881.5	36607.1	31067.4	24513.1	21050.8	30860.3	31758.6	45197	39213.3	52562.7	14583.4	29943.9	19486.8	16961.4	35690.8	42176.8	28356.3	20118.5	44645.6	35066.1	41428.3	28690.7	62305.7	21946	8698.36	20512.1	16521.8	10971.6	25906	11099.2	23711.7	17009.7	18398	39990.4	34254.2										3.1104	29062.4	2088.4	31150.8	26974
3.1752	37376.5	33326.3	29468.1	23902.9	21011.5	30201	31548.3	44412.3	37268.7	51132.1	15929.2	31106.5	19307.5	16887.1	36902.6	44442.6	32741.7	24673.7	42589.2	35298	45068.8	30813.8	62268	23938.2	10354.7	20215	17369.4	11369.2	25942.7	10320.9	23865.7	16429.7	17685.9	39568.7	33630.8										3.1752	29381.9	2053.89	31435.8	27328
3.24	37999.7	31294.2	27838.2	22885.3	20797.3	29441.6	31201.7	42603.4	35508.8	48830.5	17000.4	31805.2	18755.4	16522	37834.3	46151.4	36952.3	28949.9	40283.1	34941.9	48662.4	32291.2	60962.8	25721.2	12254.6	19818.2	18055.4	11958.9	26232	9807.41	23931.7	15758.6	17054.3	38316.9	33201.8										3.24	29475	2018.73	31493.7	27456.2
3.3048	38356.6	29928	26360.5	21583.3	20290.3	28539.6	30501	40487	33957.7	46173.3	17714.6	32163.7	18006.2	16215.1	38543	47442.5	40510.3	32680.1	38092	34544.1	51844	32669.7	58836.9	27429	13890.2	19031.6	18875.7	12730.5	26534.5	9501.76	23658.4	15164.8	16642.3	36740.2	32776.6										3.3048	29383.3	1996.49	31379.8	27386.8
3.3696	38762.1	28827	25251.5	20718.7	19411.8	27450.8	29507.2	38072.4	32636.7	43239.1	18067.5	32129.7	17099.1	16063.8	38915.4	48387.4	42886.3	35821.4	36044	34488	54351.1	31865.3	56035.5	29232	14828.5	17907.1	20235.8	13653.8	26442.2	9399.94	22927	14688.7	16436	34972.6	32124.2										3.3696	29110.9	1977.97	31088.8	27132.9
3.4344	39420.3	27616.4	24612.4	20573.7	18401.3	26294.1	28292.8	35533.7	31723.1	39977.3	17933.6	31700.6	15998.4	16033	38854.9	48916.1	44000.6	38311.3	33979.5	34499.1	55904.6	29988	52541.5	31117.6	15408.5	16680	22137.6	14527.9	25854.6	9361.4	21779.8	14246.2	16113	33082.1	31314										3.4344	28649.4	1954.25	30603.6	26695.2
3.4992	40042.1	26374	23985.7	20894.8	17460.4	24868.6	27195.5	33383.2	31002.7	36798.1	17566.4	30861.2	14836.7	15873.1	38320	48889.7	44541.8	39995.8	31913.6	34211.6	56248.3	27770.4	48985.5	32724.8	15955.3	15486.7	24094.4	15352.1	24763	9336.8	20559.8	13829.4	15603.1	31097.5	30161.6										3.4992	28028.1	1927.99	29956.1	26100.1
3.564	39778.6	25180.9	23395.6	21084.7	16642.5	23442.9	26301.2	31536.8	29994	34302.1	17415.3	29767	13811.2	15492.4	37182.8	48310.7	44947.4	40626.5	29916.7	33378.9	55220.1	25895.7	45632.1	33503	16476.2	14570.3	25626.1	15972.3	23543.3	9143.96	19531.5	13426.1	15112.1	29150.5	28462.4										3.564	27250.7	1885.61	29136.3	25365.1
3.6288	38280.9	23937.5	22850.1	20686.9	15968.7	22230.9	25537.4	29809.6	28712.3	32633.1	17675.7	28622.8	13027.5	15064.3	35516	46813.1	45393.9	40245.5	27883.8	32191.4	52833.9	24399.6	42399.9	33589.8	16914.9	13946.3	26419.6	16139	22521.4	8736.14	18503.8	13047.7	14752.3	27454.6	26356.4										3.6288	26317.1	1814.19	28131.2	24502.9
3.6936	35570.7	22487.1	22378.8	19923	15438.3	21336.1	24987.9	27988.5	27476.7	31353.3	18005.4	27463.4	12445.4	14614.9	33833.3	44413.6	45703.3	38733	26112.9	30884	49608.8	23149.7	39056.1	33106.1	17303.5	13480.7	26450.9	15715.5	21668.8	8076.04	17294.2	12858.9	14552.6	26064.9	24203.5										3.6936	25249.7	1716.21	26965.9	23533.5
3.7584	32544.8	20854.7	22003.6	19222.6	14986.9	20709.8	24420.6	26166.9	26732.2	29974.7	18112.7	26228.8	11846	14206.4	32272	41577.1	45730.2	36427.6	24724.3	29657.1	46201.8	21964.7	35665.4	32414.8	17918.4	13136.5	26085.1	14917.5	20872.2	7421.61	16094.6	12877.2	14340.2	24899.5	22353.2										3.7584	24158.9	1609.38	25768.3	22549.5
3.8232	29731.8	19222.9	21387.3	18781.7	14490.8	20127	23809.9	24714.6	26383.2	28438.7	18001.8	24986.3	11141.2	14103.5	30610.8	38762.7	46002.9	33836.4	23573.7	28509.9	43025.9	20638.5	32726.6	31354.6	18631.6	13022.3	25627.7	14100.3	19947.1	6899.06	15196.6	12845.2	13978.1	23896.2	21042.6										3.8232	23130	1515.02	24645	21615
3.888	27160.6	17856.5	20750.7	18555.5	13960.6	19381.2	22998.4	23536.9	26051	26696.3	17637.9	23592	10490.5	14178	28844.2	36528.4	46837.1	31614.2	22525.8	27488	40404.7	19133.7	30448.5	29768.6	19123.8	13038.7	25217.9	13471.8	18862	6496.01	14507.9	12736.7	13457.2	22852.2	20325.3										3.888	22186.5	1449.77	23636.3	20736.8
3.9528	24693.5	17095.2	20066.3	18608.4	13382.5	18656	21972.2	22589.2	25633.5	24894.4	17094.3	22123.7	9925.87	14025.7	27376.1	34587.8	48059.3	30073.1	21410.6	26428.6	38258.3	17675.2	28801.1	28161.7	19326.2	12939.4	24716	13121.8	17637.5	6192.32	13950.4	12590.6	12918.2	21788.9	19855.6										3.9528	21332.3	1412.85	22745.1	19919.4
4.0176	22345.9	17003.1	19423.2	18786.6	12919.1	18236.5	20871.5	21955.3	25246.4	23248.8	16527	20795.5	9405.69	13653.4	26403	32380.5	49320.1	28964.7	20300.9	25238.4	36171.3	16576.4	27397	26932.3	19234.9	12557.2	24226.7	12877.2	16323	6062.06	13488.7	12392.5	12420.5	20827.8	19399.7										4.0176	20568.9	1388.75	21957.7	19180.2
4.0824	20459.3	17275.3	18918.9	18808.6	12473.6	17986.9	19950.9	21537.5	24790	21937.5	16011.1	19913.5	8995.41	13126.6	25871.9	29776.2	50140.3	27688.4	19219.1	23973.4	34069	15899.6	25755.1	26163.9	18823.1	12055.2	23659	12656.5	15149.3	5990.68	13024.7	12092.1	11918.8	20019.4	18925.9										4.0824	19858.8	1363.59	21222.4	18495.2
4.1472	19085.8	17524.8	18429.7	18551.2	11945.8	17587.9	19071.6	21451.4	24153.1	20836.1	15445.1	19463.2	8587.68	12450.1	25509.1	27149.2	49870.2	25882.4	18219.4	22664.7	32077.9	15480.4	23819.4	25538	18387.7	11561.5	23028.4	12347.7	14358.5	5952.92	12513.6	11705.6	11420.9	19251.8	18445.3										4.1472	19136.2	1324.47	20460.7	17811.8
4.212	17875.9	17594.3	17806.9	18154.6	11385.3	16772.9	18145.9	21401.9	23524.9	19808.2	14981.7	19017.7	8118.11	11742.1	24984.3	24776.9	48158.8	23844.6	17446.9	21430.1	30367.1	15055.3	21761.9	24842.9	18273.2	11127.9	22392.8	11862.5	13876.5	5986.52	11940.8	11392.2	10901.4	18376.5	17763.2										4.212	18368.4	1264.49	19632.9	17103.9
4.2768	16705.4	17307.8	17104.5	17501.9	10938.6	15663.3	17363.3	21151.3	23096	18807.3	14582.7	18325.1	7668.1	11104.5	24219.9	22765.6	45735.3	21852.2	16976.6	20290.2	29028.1	14425.8	19945.9	24008.9	18461.2	10689.3	21951.5	11240.1	13581.1	6009.46	11280.4	11216.9	10271	17350.8	16803.4										4.2768	17583.5	1199.64	18783.2	16383.9
4.3416	15806.9	16495.1	16506.9	16897.1	10588.1	14590.6	16781	20651.8	22596.2	17939.4	14044.9	17429.2	7203.12	10508.2	23170.5	20812	43309.1	20048.3	16657.5	19188.7	27982.1	13580.6	18519.5	22999.9	18499.3	10257.3	21632.2	10539	13199.2	5986.97	10629.5	11100.4	9617.47	16388.6	15725.2										4.3416	16796.6	1140.6	17937.2	15656
4.4064	15162.9	15469.4	16273.2	16565.2	10242.5	13659.9	16408.9	19814.7	21633.9	17394.7	13297.3	16500.1	6786.62	10065	22002.3	18942.7	40763.6	18598.8	16264.2	18286	27150.5	12670.1	17376.6	21953.2	18163.6	9852.49	21270	9895.99	12747.3	5792.07	10051.2	10889.6	9159.73	15718.1	14842.7										4.4064	16047.6	1081.05	17128.6	14966.5
4.4712	14534.1	14654.5	16293.3	16630.4	9748.36	13010.5	16193.6	18798	20162.8	17125.2	12395.5	15692.1	6408.96	9748.27	20922	17487	38020.4	17548.6	15748.5	17626.1	26400	11619.7	16386.8	21023.8	17575.3	9546.43	20792.9	9350.42	12294.8	5395.57	9492.95	10587.5	8884.16	15302.2	14233.9										4.4712	15361	1021.35	16382.3	14339.6
4.536	13915.3	14259.9	16289.1	16828.8	9204.12	12757.4	15765.8	18098.6	18639.4	16888.7	11690.8	15003.1	6151.73	9629.94	20003.3	16671.4	35179.1	16845.6	15163.3	17018.1	25587.1	10523.3	15650	20215.9	17070.2	9251.12	20178.7	8755.03	12020.7	4965.81	9026.16	10312.6	8625.88	14994.5	13857.5										4.536	14772.5	962.846	15735.4	13809.7
4.6008	13474.5	14230.4	16034.9	16786.1	8773.4	12854.2	15233.4	17720.9	17417.4	16519.7	11170.7	14470.7	6005.5	9606.33	19239.5	16135.2	32127.5	16237	14608.1	16450.4	24675	9550.51	15234.4	19403.5	16778.4	8969.42	19688	8042.38	11814.4	4593.99	8653.98	10013.6	8342.9	14477.4	13457.9										4.6008	14251.2	903.346	15154.5	13347.8
4.6656	13149.6	14147.9	15470.2	16395.4	8540.8	13073.1	14828.8	17377.3	16610	15984.6	10787.5	14048.3	5854.13	9450.58	18435.1	15611.4	29141.4	15420.7	14095.7	16026.1	23791.4	8793.95	14930.5	18532.2	16534.9	8863.2	19550.9	7308.1	11480.6	4317.12	8289.82	9650.33	7949.6	13768.8	13031										4.6656	13749.7	848.634	14598.4	12901.1
4.7304	12753	13681.2	14763.8	15824.9	8421.65	13125.4	14527.5	16848.6	16183.5	15479.2	10478.1	13628.4	5703.98	9134.45	17601.5	15208.4	26663.8	14443.3	13486.1	15740.8	22934.1	8190.81	14562.3	17655.2	16284	8890.32	19648.6	6718.5	10994.8	4081.22	7910.44	9219.99	7473.98	12923.9	12660.3										4.7304	13252.7	805.951	14058.7	12446.8
4.7952	12107.9	12929.8	14135.6	15305.8	8375.48	12879.8	14208.2	16172	15875.5	15056.9	10193.8	13184.6	5497.86	8735.66	16960.1	14930.6	24760.1	13604.3	12821.6	15512.4	22134.8	7708.04	14012	16695.1	16138.3	8897.22	19580.4	6288.94	10492.2	3891.5	7524.24	8768.69	7094.15	11964.4	12476.1										4.7952	12769	773.659	13542.6	11995.3
4.86	11433.4	12075.8	13634.4	15008.2	8196.75	12299.2	13773.1	15484.2	15566.8	14844.8	9983.41	12808.2	5227.76	8401.57	16629.6	14579.8	23232.2	12957.8	12211.2	15361.8	21417.5	7322.1	13298.1	15719.6	16167.8	8740.2	19145.2	6097.83	10015.5	3877.1	7219.02	8376.49	6821.17	11051.7	12539										4.86	12329.1	746.336	13075.4	11582.8
4.9248	10937	11330.6	13051.3	14941.7	7875.25	11653.9	13276	14957.8	15304.6	14790.7	9802.79	12481.5	5012.76	8170.65	16406.1	14282.3	21890.5	12541.6	11612.6	15139.9	20712.9	6967.72	12569	14863.6	16096.2	8324.8	18417.8	6084.73	9534.92	3930.53	7065.75	8041.15	6653.15	10342	12588.7										4.9248	11932.9	720.534	12653.5	11212.4
4.9896	10612.2	10673.9	12225	14789.6	7571.11	11070.5	12807.8	14528.3	15162.3	14846.4	9583.9	12141.1	4865.65	8126.45	16098	13947.9	20683	12257.9	11061	14799.5	20017.2	6736.69	11973.7	14096.6	15809.4	7831.41	17623.4	6089.17	8980.69	3875.02	7077.19	7799.74	6583.54	9808.22	12380.1										4.9896	11558.1	693.883	12252	10864.2
5.0544	10307.7	10103.1	11570.2	14558.8	7296.51	10575	12349.8	14114.5	15041.5	14696.9	9203.06	11490.6	4723.31	8270.3	15543.9	13433.8	19563.2	11912.4	10619.7	14373.3	19362.6	6631.51	11532.5	13361.4	15470.9	7478.46	16933	6010.46	8457.36	3675.11	7166.94	7641.44	6540.85	9416.65	12037										5.0544	11184.7	666.102	11850.8	10518.6
5.1192	9759.2	9462.78	11371.1	14097.8	7123.67	10198.3	11966.4	13768.7	14850.3	14178.5	8727.13	10560.9	4574.92	8488.83	14766.4	12772.5	18541	11517.2	10298.6	13745.9	18854.7	6494.12	11164.5	12807.9	15133.3	7311.6	16398.1	5786.75	8100.96	3364.59	7118.86	7489.99	6319.37	9175.71	11693.1										5.1192	10799.5	641.014	11440.5	10158.5
5.184	9139.27	8797.9	11427.1	13483.1	6948.12	10026.1	11819.7	13369.1	14529.5	13549.1	8353.17	9722.82	4375.75	8473.82	14032.7	11974.6	17631.4	11159.1	10148.9	13009.8	18527.8	6219.88	10831	12414.8	14866.4	7293.56	15880.3	5528.6	7872.9	3174.99	6859.96	7347.12	5870.12	8955.43	11489.3										5.184	10431.5	621.723	11053.2	9809.8
5.2488	8544.02	8333.69	11379.2	13060.7	6670.73	9954.87	11879.2	13224.4	14107.7	12961.1	7964.78	9123.17	4154.62	8124.73	13488.3	11356	16864.4	10787.3	10105.5	12324.3	18269.6	5808.33	10488.6	12161.3	14617.8	7363.73	15381.3	5280.29	7659.41	3103.71	6452.8	7176.44	5449.82	8641.85	11437.7										5.2488	10105.8	611.357	10717.1	9494.4
5.3136	8149.34	8116.61	11018.6	13003.1	6470.68	9847.32	11996.9	13489.6	13778.7	12641.4	7552.83	8789.15	3950.21	7476.72	13055.6	10881.1	16151.6	10381.1	10066.4	11925.8	17996.1	5402.04	10002.7	11943.4	14247	7359.24	14901.8	5111.7	7414.13	3028.25	6033.61	7066.62	5171.87	8304.35	11360.4										5.3136	9831.02	606.421	10437.4	9224.6
5.3784	7965.78	8117.82	10575.7	13209.5	6346.98	9749.07	12051.5	13813.9	13757.1	12420.5	7176.12	8647.91	3801.51	6842.36	12770.2	10473.2	15427.1	9825.32	10058.3	11842.7	17656.6	5045.26	9556.6	11687.4	13801.3	7218.57	14425.3	5020.49	7147.32	2890.95	5734.06	6968.16	5013.43	7933.16	11220.8										5.3784	9605.49	603.529	10209	9001.96
5.4432	7802.05	8179.52	10324	13630.6	6281.33	9657.77	12172.6	13736.4	13882.6	12102.4	6792.19	8635.39	3708.17	6462.16	12640.1	10233.1	14731.6	9121.48	10017.3	11851.1	17237	4750.88	9295.46	11424.4	13569.3	6960.74	14073.5	4795.07	6914.71	2705.79	5535.33	6825.56	4936.11	7697.36	11199.3										5.4432	9425.21	603.275	10028.5	8821.94
5.508	7554.81	8081.11	10177.1	14356.3	6245.68	9414.61	12189.7	13213.3	13969.5	11665.9	6438.13	8625.14	3588.49	6311.95	12638	9998.59	14059.4	8406.23	9867.6	11810.4	16774.6	4565.44	9018.01	11148.7	13497.9	6689.56	13965.1	4419.73	6691.82	2506.08	5346.75	6639.25	4838.45	7662.73	11290.9										5.508	9247.63	606.06	9853.69	8641.57
5.5728	7197.83	7906.14	10180.2	14830.1	6208.51	8965.92	11906.7	12877.7	14134.7	11208.3	6161	8311.62	3454.11	6332.59	12650.9	9712.17	13366	7763.83	9526.55	11604.2	16302.6	4446.79	8667	10853.5	13432	6562.75	14062.1	4058.62	6419.26	2320.39	5113.92	6364.01	4664.67	7685.51	11325.1										5.5728	9045.07	609.902	9654.97	8435.17
5.6376	6887.27	7665.23	10253.4	14821.5	5993.46	8423.9	11508.4	13040.7	14400.8	10947.9	5916.02	7721.8	3343.03	6364.3	12688.3	9406.84	12725.4	7401.75	9065.89	11312.1	15888	4321.19	8201.22	10586.8	13283.8	6471.97	14122.4	3847.12	6134.02	2172.77	4911.75	6025.3	4436.82	7506.07	11216										5.6376	8828.95	614.706	9443.65	8214.24
5.7024	6676.86	7376.02	10134.6	14332.1	5638.47	7818.37	11113.4	13749.9	14628.1	11003.9	5722.26	7155.38	3262.55	6193	12628	9124.01	12259.2	7323.01	8621.29	11080.2	15451.6	4163.37	7778.79	10294.5	13083.4	6317.78	13968.7	3743.49	5749.2	2009.56	4769.4	5671.32	4212.74	7109.31	10955.8										5.7024	8603.42	619.562	9222.98	7983.86
5.7672	6520.61	7114.62	9864.02	13555.2	5421.95	7301.77	10845.2	14790	14603.8	11041.1	5540.32	6806.19	3244.07	5875.7	12304.6	8953.68	11961.6	7288.77	8251.5	10919.6	14989.9	3998.07	7534.3	10079.3	12752.6	6199.47	13741.3	3723.73	5262.69	1788.94	4737.76	5446.13	4107.05	6616.09	10724.2										5.7672	8397.3	621.075	9018.38	7776.23
5.832	6332.33	6881.64	9671.81	12796.1	5347.54	6956.74	10732.1	15511.5	14099.4	10994.2	5408.47	6658.47	3249.67	5589.74	11765.6	8834.24	11729.9	7200.76	7903.3	10620.8	14644	3834.42	7417.06	9878.55	12347.6	6231.9	13522.4	3761.2	4794.88	1602.04	4731.23	5420.1	4022.75	6286.29	10613.3										5.832	8211.2	614.688	8825.89	7596.51
5.8968	6079.03	6551.92	9555.83	12295.4	5371.11	6789.47	10730.1	15690.7	13208.6	10823.1	5361.08	6610.97	3209.99	5402.75	11201.1	8607.99	11529.4	6919.36	7693.33	10087.2	14487.2	3640.9	7370.84	9647.4	12113.5	6381.74	13332.2	3780.92	4393.93	1586.51	4707	5434.49	3821.08	6091.92	10610.2										5.8968	8031.95	603.505	8635.45	7428.44
5.9616	5888.35	6152.64	9632.38	12001.2	5242.74	6737.51	10438.3	15465.2	12196.5	10558.9	5327.01	6658.17	3142.88	5304.44	10775.1	8139.34	11215.6	6513.55	7566.75	9455.73	14481.9	3415.38	7353.6	9280.03	12059.4	6504.78	13211	3676.72	4109.27	1646.68	4626.3	5381.91	3549.87	5917.88	10575.6										5.9616	7834.36	592.075	8426.44	7242.29
6.0264	5843.85	5758.96	9680.35	11756.1	4872.41	6649.52	9863.25	15022.4	11494.9	10267.9	5281.19	6827.74	3058.68	5251.22	10505.2	7614.61	10786.9	6072.78	7451.27	8953.17	14483	3176.22	7283.75	8917.01	12118.7	6462.74	13171.6	3483.29	3901.28	1689.33	4540.84	5189.85	3323.11	5788.78	10322.1										6.0264	7624.68	583.414	8208.1	7041.27
6.0912	5906.77	5419.69	9731.1	11465.2	4428.65	6475.08	9368.07	14511.7	11248.5	10033.6	5239.54	7099.18	2900.49	5252.81	10359.6	7144.73	10401.7	5738.26	7220.3	8750.47	14370.3	2933.82	7163.61	8844.47	12174	6156.47	13165.3	3352.62	3742.78	1674.4	4454.59	4863.9	3152.77	5638.32	10036.9										6.0912	7440.56	579.766	8020.33	6860.8
6.156	5990.03	5104.6	9740.82	11131.4	4000.07	6354.66	9140.27	13981	11183.1	9791.92	5106.17	7413.78	2720.7	5307.46	10291.4	6677.07	10130.7	5569.22	6979.56	8859.87	14202.2	2662.11	7074.36	9009.89	12098.4	5649.85	13115.3	3255.77	3591.04	1613.46	4270.24	4534.12	3008.89	5406.65	9666.5										6.156	7275.22	579.38	7854.6	6695.84
6.2208	6020.02	4866.25	9586.19	10784.3	3613.03	6329.32	9143.63	13437.2	10972.9	9534.97	4848.98	7636.01	2598.64	5329.93	10311.6	6327.33	9970.22	5436.83	6907.54	9137.75	14061	2418.93	6956.56	9302.13	11916.4	5196.52	13060.6	3159.48	3409.18	1525.62	3998.26	4319.44	2897.65	5241.48	9135.26										6.2208	7125.46	579.178	7704.64	6546.29
6.2856	5986.61	4770.68	9535.7	10654.8	3323.28	6256.06	9098.7	12903.6	10647.2	9338.07	4545.66	7638.39	2486.06	5211.35	10471.5	6198.33	9857.31	5245.65	6851.3	9352.94	13980.9	2259.77	6870.28	9461.66	11567.5	4956.95	13072	3097.5	3219.58	1364.3	3749.24	4087.28	2780.9	5090.17	8528.55										6.2856	6984.57	580.261	7564.83	6404.3
6.3504	5974.03	4590	9515.11	10691.5	3183.3	6152.75	9053.1	12499.2	10388.2	9301.47	4332.06	7501.17	2376.73	5011.19	10623.4	6245.08	9726.08	5033.2	6719.49	9177.21	13973.7	2116.56	6755.26	9388.05	11149.7	4904.35	13051.9	3024.31	3095.76	1180.02	3555.39	3751.73	2708.74	4936.23	8066.2										6.3504	6850.06	581.718	7431.78	6268.34
6.4152	6021.66	4215.21	9362.68	10797.7	3183.64	6062.16	9100.29	12145	10224	9391.33	4243.88	7358.59	2342.04	4841.24	10656.2	6250.27	9648.19	4855.63	6610.79	8642.6	13986	2030.09	6499.06	9187.75	10923.6	4909.94	12864.5	2916.37	3040.34	1028.79	3400.83	3393.76	2656.07	4807.11	7887.85										6.4152	6728.14	581.344	7309.49	6146.8
6.48	6220.45	3820.71	9132.25	11008.1	3367.34	5801.85	9207.08	11714.4	10183.4	9615.11	4202.74	7219.95	2381.84	4715.52	10597	6130.38	9695.99	4689.6	6568.26	8140.29	13987.4	2009.36	6067.31	8953.29	10924.1	4859.54	12626.5	2807.4	2996.93	1012.5	3313.41	3167.34	2507.24	4724.34	8057.66										6.48	6640.76	581.209	7221.97	6059.55
6.5448	6616.86	3530.44	8713.92	11136.6	3591.52	5355.69	9563.29	11555.6	10242.1	9802.08	4247.05	7059.21	2427.38	4654.11	10439.1	5923.91	9834.56	4561.82	6311.47	8003.61	14041.4	2033.98	5668.04	8681.08	11011.3	4729.33	12400.9	2736.53	2905.84	1004.44	3271.65	3125.76	2324.49	4655.43	8325.33										6.5448	6585.31	584.702	7170.01	6000.61
6.6096	7076.94	3359.5	8351.12	11095.7	3738.63	4986.89	9891.82	11786.5	10298.9	9830.38	4370.33	6981.11	2463.97	4622.93	10141.3	5692.84	10006.7	4519.32	5809.62	8290.92	14149.2	2116.7	5540.34	8381.02	11237.6	4514.64	12151.6	2722.97	2789.13	962.824	3233.89	3244.24	2277.17	4535.49	8398.11										6.6096	6559.15	589.596	7148.74	5969.55
6.6744	7477.45	3354.94	8286.03	10813.1	3676.19	4784.76	9922.86	12538.2	10364.9	9733.01	4524.09	7008.38	2517.88	4590.62	9808.57	5385.01	10161.4	4569.08	5270.93	8680.09	14265.6	2205.29	5658.05	8088.39	11539.2	4307.88	11781.4	2740.46	2745.98	938.686	3130.74	3538.26	2375.48	4364.28	8394.34										6.6744	6558.33	594.633	7152.97	5963.7
6.7392	7692.69	3249.89	8401.02	10538.4	3402.69	4800.1	9678.03	13596.4	10633.5	9546.14	4700.79	6961.13	2516.4	4571	9478.89	5103.88	10310	4626.2	4833.23	8787.13	14299	2277.74	5770.19	7971.48	11602.2	4184.85	11369.6	2786.05	2823.19	908.687	2943.05	3862.61	2444.08	4320.12	8425.58										6.7392	6554.74	601.509	7156.25	5953.23
6.804	7674.98	3053.14	8471.72	10325.7	3127.94	4904.09	9326.44	14349.5	10857.6	9390.28	4752.83	6926.56	2472.07	4635.24	9162.59	4952.75	10438.6	4620.94	4563.52	8721.55	14183.3	2299.65	5780.33	8023.02	11355.5	4060.56	10997.3	2840.49	2966.8	855.492	2732.14	4103.24	2383.13	4402	8484.78										6.804	6519.89	604.617	7124.5	5915.27
6.8688	7519.15	2935.05	8457.44	10184.5	3022.67	4993.82	8913.14	14586	10593.3	9315.96	4731.43	6932.94	2409.05	4794.59	8874.86	4929.63	10531.6	4571.26	4501.85	8541.24	13993.9	2268.84	5789.21	8250.12	10978.6	3946.36	10739.4	2830.44	3072.28	820.645	2635.45	4226.94	2291.79	4538.16	8653.94										6.8688	6467.87	598.681	7066.55	5869.19
6.9336	7284.61	2815.42	8572.34	10214.5	3104.18	5115.36	8523.89	14246.2	10099.9	9258.08	4817.35	7042.77	2320.18	5051.36	8664.86	4896.1	10552.8	4465.84	4483.01	8382.76	13744.6	2225.42	5824.85	8594.61	10670.3	3871.08	10634.1	2810.95	3166.46	830.402	2624.81	4252.94	2270.93	4587.46	8874.69										6.9336	6425.57	586.575	7012.15	5839
6.9984	7168.63	2684.14	8798.7	10283.2	3211.77	5421.61	8207.46	13374	9776.05	9156.63	4887.31	7352.24	2232.47	5213.44	8595.52	4985.82	10547	4425.46	4425.04	8229.82	13493	2186.32	5808.06	8957.56	10537.3	3888.43	10604.4	2863.22	3318.79	853.934	2556.77	4168.71	2332.19	4383.22	8930.31										6.9984	6395.96	572.461	6968.42	5823.5
7.0632	7202.38	2574.05	8908.76	10260	3260.73	6040.48	8147.96	12403.4	9649.12	8993.47	5020.97	7754.3	2207.26	5217.82	8650.75	5269.06	10565.7	4499.31	4386.39	8043.64	13295.5	2217.74	5762.59	9264.1	10603.7	4109.66	10556.2	2846.98	3485.89	887.937	2443.55	4031.61	2415.11	4029.98	8737.91										7.0632	6392.69	559.996	6952.68	5832.69
7.128	7243.28	2495.18	8742.34	10244.5	3123.82	6838.96	8398.17	11592.9	9799.01	8846.31	5198.38	8195.53	2227.62	5295.65	8815.6	5637.2	10657.4	4613.65	4381.35	7969.77	13188.4	2300.23	5697.11	9488.6	10779.1	4391.98	10622.5	2765.14	3628.05	956.709	2347.97	3860.03	2474.95	3628.05	8395.38										7.128	6424.02	555.814	6979.84	5868.21
7.1928	7172.92	2554.15	8503.6	10349.6	2847.57	7533.12	8812.12	10819.2	10160.5	8788.97	5455.33	8481.47	2243.99	5381.15	8957.64	6009.48	10780.4	4633.53	4335.23	7914.16	13142.8	2361.88	5728.84	9584.3	10911.6	4653.25	10926.3	2689.86	3701.95	1051.93	2284.88	3738.42	2501.26	3327.75	8126.14										7.1928	6470.44	558.337	7028.78	5912.1
7.2576	6981.17	2758.06	8352.24	10435.7	2575.45	8061.29	9283.71	10237.6	10596.6	8845.94	5703.58	8517.56	2304.06	5422.67	8978.31	6130.82	10888	4516.95	4286.91	7812.42	13146.7	2423.15	5788.61	9598.83	10931.8	4868.62	11420.7	2623.22	3678.39	1160.55	2291.14	3652.98	2452.24	3208.43	8011.96										7.2576	6512.76	564.198	7076.95	5948.56
7.3224	6843.88	2960.65	8334.17	10401.7	2350.55	8484.81	9581.19	9762.22	11066.5	8962.31	5765.66	8459.7	2333.49	5404.53	8807.81	6034.39	11023.6	4205.88	4245.43	7623.2	13236.9	2545.09	5817.48	9568.45	10895.2	5055.91	12007.7	2619.76	3603.44	1259.24	2326.62	3519.61	2365.99	3247.9	8036.75										7.3224	6535.94	572.358	7108.29	5963.58
7.3872	6957.2	3061.83	8432.07	10413.8	2201.14	8827.23	9778.97	9574.55	11600.7	8993.35	5652.69	8468.53	2385.5	5446.8	8508.4	5905.48	11205.7	3854.79	4116.5	7424.43	13410.2	2648.26	5863.07	9461.9	10858.4	5263.61	12629.5	2760.28	3537.3	1322.98	2345.04	3387.86	2334.4	3428.15	8141.38										7.3872	6577.2	583.929	7161.13	5993.27
7.452	7234.19	3087.69	8514.28	10345.6	2152.41	9104.96	9848.27	9777.58	12122.5	9036.55	5547.06	8553.22	2465.36	5553.16	8304.15	5771.39	11398.6	3672.31	3971.68	7354.96	13661.2	2804.93	6032.07	9350.22	10913.9	5461.42	13126.5	2980.96	3549.8	1372.19	2356.38	3368.14	2423.06	3600.18	8293										7.452	6660.28	595.059	7255.34	6065.22
7.5168	7553.3	3252.04	8729.54	9979.57	2208.45	9292.83	9787.75	10173.7	12488.4	9171.87	5500.67	8817.19	2545.29	5748.82	8247.89	5747.26	11560.1	3729.87	3909.17	7461.15	13927.4	3036.12	6422.5	9200.48	11015.5	5626.27	13440.6	3236.7	3603.2	1482.02	2322.59	3459.34	2573.87	3693.96	8498.66										7.5168	6784.12	600.092	7384.21	6184.03
7.5816	8010.07	3599.2	8930.87	9622.13	2424.74	9535.7	9744.19	10666.8	12715.3	9243.26	5490.94	9290.63	2668.79	5859.71	8333.2	5893.75	11706.5	3935.13	4004.93	7744	14107.4	3216.17	6766	9053.89	11032.8	5651.9	13688.8	3489.12	3763.44	1560.41	2256.3	3604.86	2700.73	3723.04	8740.59										7.5816	6936.44	602.052	7538.49	6334.38
7.6464	8563.03	3743.1	9004.51	9400.95	2631.34	9860.25	9824.02	10984.8	12764.1	9129.51	5635.72	9856.7	2807.07	5762.01	8653.62	6067.5	11983.3	4171.23	4246.13	8124.98	14197.6	3345.45	6988.83	8888.01	10862.3	5600.45	13954.1	3616.7	4017.52	1572.72	2251.99	3753.61	2785.31	3714.77	9071.37										7.6464	7080.99	605.018	7686.01	6475.97
7.7112	8987.73	3578.24	8968.62	9470.23	2797.77	10143.2	10144.2	11139.1	12755.5	8935.49	5895.11	10425.3	2910.62	5583.59	9180.98	6115.85	12325.4	4439.77	4517.18	8506.99	14216.7	3478.38	7110.26	8794.2	10716.3	5541.9	14140.9	3621.92	4396.82	1583.45	2349.7	3907.69	2850.61	3717.86	9395.47										7.7112	7218.37	610.175	7828.55	6608.2
7.776	9156.29	3262.78	8827.1	9895.85	2924.84	10462.8	10474.4	11330.6	12980.8	8814.63	6098.92	10921.3	3006.63	5508.38	9896.35	6081.97	12532.6	4727.22	4893.08	8830.1	14128.5	3778.02	7225.26	8805	10950.6	5505.72	14337.3	3589.93	4930.91	1674.26	2511.37	4115.68	2953.45	3785.4	9740.3										7.776	7390.24	617.525	8007.76	6772.71
7.8408	9201.52	3057.72	8662.2	10458.5	2909.85	10624	10584.8	11605.9	13325	8887.1	6176.68	11356.9	3120.66	5591.45	10699.3	5974.64	12501.6	4939.45	5371.21	9148.34	14037.1	4202.64	7203.3	8885.28	11622	5690.49	14730.7	3594.16	5452.53	1802.74	2782.58	4267.89	3123.62	3887.72	10157.1										7.8408	7589.62	627.367	8216.99	6962.25
7.9056	9179.85	2994.95	8520.37	10927.6	2781.02	10785	10563.6	11941.5	13636.9	9027.29	6232.27	11731.2	3202.75	5746.27	11212.5	5966.09	12344.7	5021.35	5707.4	9563.23	14071.4	4555.64	6998.56	8966.86	12383.8	6053.96	15210.7	3624.13	5822.52	1977.4	3142.35	4333.52	3312.19	4029.51	10503.1										7.9056	7773.47	638.627	8412.1	7134.85
7.9704	9289.49	3137.15	8402.88	11173.1	2702.19	10951	10506.2	12271.2	13969.5	9064.67	6341.28	12124.4	3249.18	5940.97	11353.4	6305.94	12356.9	5185.89	5867.13	10031.3	14254.8	4730.62	6835.61	9098.2	12850.6	6387.72	15600.9	3652.53	5959.84	2108.72	3390.07	4386.88	3461.76	4245.71	10550.4										7.9704	7935.38	647.732	8583.11	7287.64
8.0352	9337.42	3627.9	8187.89	11054.3	2815.1	11022.1	10522.3	12517.4	14345.8	9057.52	6572.23	12668.2	3343.95	6185.1	11347.6	6937.51	12595	5493.29	5948.8	10394.3	14583.2	4863.54	6823.26	9456.63	13046	6661.65	15788.2	3691.72	5947.18	2146.09	3378.77	4452.76	3621.48	4520.95	10273										8.0352	8092.23	651.202	8743.44	7441.03
8.1	9322.33	4228.88	8016.75	10571.9	3113.4	10961.2	10479.2	12419.4	14889.3	9246.66	6969.58	13271.3	3498.64	6318.43	11386.5	7676.93	12871.5	5711.87	6012.94	10612.5	14917.4	5117.78	7026.63	9933.38	13191.2	6908.02	15828.4	3731.96	5906.66	2090.76	3228.62	4512.84	3840.04	4756.19	9870.45										8.1	8241.13	651.553	8892.68	7589.57
8.1648	9390.86	4675.44	7902	10003	3403.84	10792.6	10380.9	11908.2	15837	9580.58	7447.36	13833.4	3706.85	6397.74	11530	8215.72	13093	5730.43	6112.32	10770.1	15191.6	5556.82	7450.76	10360	13339.7	7121.78	15987.5	3773.65	5922.3	2135.27	3151.26	4518.85	4035.56	5124	9380.5										8.1648	8393.17	654.839	9048.01	7738.33
8.2296	9548.13	4961.96	7910.47	9638.73	3696.36	10630.1	10326.9	11303.5	17423.7	9999	7811.74	14320.6	3956.06	6511.66	11778	8506.94	13382.9	5655.17	6222.03	10939	15464.2	6203.22	7926.79	10573.4	13445	7171.5	16349	3898.25	6024.66	2334.91	3213.64	4551.61	4162.13	5644.14	9017.51										8.2296	8585.8	667.858	9253.66	7917.94
8.2944	9735.56	5164.06	8200.8	9355.41	3999.3	10515.3	10396	10880.5	17415	10378.4	7951.34	14951.7	4137.99	6641.22	12197.8	8689.65	13766.5	5705.27	6315.06	11164.9	15808.9	6934.4	8312.18	10690.7	13499.6	7111.22	16854.4	4111.1	6266.79	2523.15	3373.59	4673.05	4316.34	6216.42	8858.15										8.2944	8774.62	669.963	9444.59	8104.66
8.3592	9941.23	5234.4	8494.24	9227.81	4290.65	10569.3	10681.1	10923.8	18146.2	10644.4	8015.77	15722	4182.81	6762.88	12813.8	8798.09	14028.3	6013.96	6570.38	11324.2	16191.3	7543.42	8549.86	11009.6	13601	7131.17	17454.6	4437.61	6618.63	2636.5	3612.95	4862.65	4474.31	6708.09	8792.39										8.3592	9028.84	686.264	9715.11	8342.58
8.424	10312.5	5197.85	8765.66	9407.19	4643.45	10835.2	11053.2	11173.4	18368.5	10891.7	8194.74	16284.9	4148.46	6850.47	13485.3	8938.96	14082.7	6410.7	7078.04	11348.3	16585.2	7953.91	8698.1	11616.5	13900.8	7257.35	18092.9	4752.2	6964.97	2730.04	3885.26	5066.65	4613.61	7215.79	8794.34										8.424	9302.83	698.418	10001.2	8604.41
8.4888	10889	5107.29	8805.68	9900.18	4996.08	11341.3	11501.7	11361.6	18328.3	11191.4	8604.75	16621.9	4167.71	6980.05	13944.2	9321.18	14157.6	6754.86	7635.03	11375.3	16924.9	8205.4	9060.41	12365.1	14470.1	7471.58	18635.4	5005.2	7257.11	2886.54	4128.72	5315.5	4828.86	7774.68	9055.41										8.4888	9610.57	706.219	10316.8	8904.36
8.5536	11561	5182.48	8614.49	10632.9	5217.45	11949.8	12102.6	11684.9	18107.6	11586.7	9005.79	16939.2	4293.63	7328.52	14114.6	9884.55	14462.2	7117.28	8249.04	11609.7	17172.8	8467.89	9635.9	12961.7	15083.1	7858.14	18901.3	5243.89	7428.18	3039.68	4320.27	5609.13	5107.7	8430.18	9717.98										8.5536	9960.64	708.779	10669.4	9251.86
8.6184	12226.6	5499.12	8370.43	11452.8	5263.59	12462.3	12578.3	12055.8	18577.7	11994.9	9338.02	17257.4	4574.63	7802.47	14240.9	10482.6	15068.8	7462.88	8738.03	12058.2	17434.1	8801.31	10212.2	13346.8	15636.2	8236.02	18861	5494.11	7562.34	3164.69	4517.43	5815.05	5332.45	9082.88	10425.8										8.6184	10326.5	716.796	11043.3	9609.72
8.6832	12830.7	5963.26	8296.91	12208.3	5151.11	12833.6	12870.9	12501	18820	12441.7	9539.73	17612.1	4955.61	8185.03	14368.2	10999.4	15804.6	7673.44	8858.19	12756	17701.1	9166.65	10764.2	13545.1	16125	8396.4	18950.3	5759.15	7791.85	3337.93	4742.58	5917.09	5536.62	9704.17	10747.8										8.6832	10653	726.106	11379.1	9926.91
8.748	13483.8	6508.02	8439.18	12844.8	5024.23	13065.1	13274.2	13152.2	19079.7	12914.5	9590.89	18074.5	5297.33	8411	14504.2	11469.4	16478	7847.54	8818.93	13748.8	17875.5	9576.27	11280.4	13563.7	16468.7	8474.38	19474.5	5987.97	8187.27	3580.53	5007.47	5945.82	5828.01	10180.5	10707.6										8.748	10976.1	740.273	11716.4	10235.9
8.8128	14242	6947.77	8766.83	13183.9	5081.33	13053.1	13846.4	13921.2	19341.3	13386.5	9663.43	18678.8	5522.29	8637.41	14741.7	11884.9	17005.6	8074.44	8917.76	14798.4	18021.4	10111.2	11814	13673.3	16731.1	8523.39	20231.2	6139.78	8648.73	3912.11	5216.49	5998.88	6231.32	10694.6	10580.5										8.8128	11320.7	756.875	12077.5	10563.8
8.8776	15068.7	7089.21	9258.21	13329.6	5417.26	12736.5	14460.2	14341.8	19485.4	13893.9	9971.63	19352.5	5671.15	8884.67	15166.4	12162	17543.5	8303.13	9292.47	15716.9	18358.6	10852.8	12311	14028.1	17087.9	8581.96	21030.7	6297.28	8999.24	4313.77	5316.72	6258.55	6677.44	11340.6	10573.2										8.8776	11690.7	773.588	12464.2	10917.1
8.9424	16015.6	7168.09	9780.63	13346.2	5971.25	12385.3	14777	14328.5	19628.5	14357.2	10454.5	19889.1	5735.13	9158.03	15746	12368.9	18328	8551.86	9878.46	16382.5	18846.3	11602.2	12815.6	14546.1	17843.9	8619.43	21813.9	6683.76	9160.55	4653.18	5397.03	6759.45	7063.32	12221.8	10743.7										8.9424	12086.3	790.979	12877.3	11295.3
9.0072	17034.7	7392.12	10220.2	13248.9	6454.84	12191.3	14813.8	14014.2	19836	14746.1	10909.5	20292.2	5759.01	9501.48	16424.8	12565.6	19198.3	8854.96	10541	16715.3	19385.6	12189.5	13341.9	15072.8	18892.7	8623.9	22355.6	7150.91	9266.55	4868.32	5511.14	7373.24	7333.73	13120.2	11096.5										9.0072	12465.6	808.417	13274	11657.2
9.072	18350.1	7565.09	10480.5	13196.6	6813.15	12175.5	14625.9	13894.1	20252.9	15196.6	11333.1	20717.9	5817.89	9903.6	17148.5	12903.4	19880.9	9231.2	11067.4	16804.4	20060.9	12657.1	14096.3	15445.3	19807.8	8647.48	22613.3	7529.13	9535.37	5071.05	5643.37	7958.93	7536.65	13837.2	11557.6										9.072	12838.8	827.97	13666.7	12010.8
9.1368	19904.4	7542.83	10453.4	13172.2	7231.38	12270	14446.5	14110.7	20706.6	15794	11782.5	21188.4	5922.24	10273.9	17903	13366.8	20223.2	9760.89	11379.9	16725.6	20905.6	13164.7	15101.4	15684.1	20246.4	8648.24	22662.5	7836.48	10101.9	5242.49	5764.06	8404.38	7746.52	14499.4	12005.9										9.1368	13204.9	847.511	14052.4	12357.4
9.2016	21589.8	7494.69	10521.5	13255.5	7706.32	12461.5	14460.3	14691.2	21024.1	16464.1	12350.9	21622	6061.03	10516.6	18564.4	13969	20527.9	10485.1	11565	17018.1	21867	13821.7	15956.8	15840.4	20257.7	8652.05	22536.5	8114.79	10874.9	5355.55	5917.93	8566.57	7923.74	15217.2	12493.4										9.2016	13592.7	867.76	14460.5	12725
9.2664	23181.4	7530.68	10750.3	13273.6	8155.92	12630.3	14857.6	15477.1	20945.8	16985.2	13058.2	22055.9	6263.85	10836.2	19039.1	14690.6	21050.9	11361.8	11726.8	17946.7	22828.5	14545.5	16585	16031.8	20210.1	8784.94	22313.6	8413.17	11582.4	5430.78	6236.77	8597.82	8061.26	16063.4	13127.8										9.2664	14018	887.076	14905.1	13130.9
9.3312	24294.5	7723.45	10932.9	13229.1	8515.03	12810.5	15638.4	16232.1	21080.5	17170.3	13815.8	22483.5	6509.46	11206.2	19444.1	15638.2	21876.7	12159.5	11861.5	19353.1	23721.5	15373.5	17200.3	16244.3	20461.3	9093.04	22297.8	8774.96	11998.8	5543.33	6735.45	8766.31	8102.21	16767.5	14013.9										9.3312	14487.7	909.833	15397.5	13577.9
9.396	24704.5	8058	11099.4	13207.7	8810.47	13017.6	16562.6	16901.2	20618.1	17291.9	14476.8	23016	6778.35	11523.2	19864	16847.3	22903	12715.8	11986.7	20660.4	24578.8	16361.4	18004.3	16330.8	21043.9	9462.98	22568.9	9221.33	12066.8	5715.44	7221.98	9120.6	8063.22	17394.6	14776.4										9.396	14942.1	931.213	15873.3	14010.9
9.4608	24784.7	8227.47	11122.8	13638.6	8973.02	13463.8	17295.5	17252.7	20999.8	17327.9	14832.1	23595.8	7065.74	11944.9	20266.6	18179.8	24022.2	13103.9	12144.1	21474.7	25488.6	17548.7	18812.2	16506.1	21673.3	9950.99	22915.7	9680.72	12032.6	5908.06	7512.66	9606.75	8058.04	17852.4	15266.4										9.4608	15386.6	957.12	16343.7	14429.4
9.5256	25215.9	8163	11159.6	14283	8964.66	14173	17674.3	17268.6	20830.6	17378.2	15044.9	24177.7	7343.52	12596.1	20782.6	19419.1	25207.8	13525.3	12320.4	21919.4	26654.9	18895.7	19550.1	16912.4	22166.9	10474.2	23257.7	10239.6	12113.4	6215.28	7598.28	10133.2	8148.79	18154.7	15687.6										9.5256	15818.6	984.937	16803.5	14833.6
9.5904	26426.8	7913.42	11213.7	14776.2	8968.15	15073.9	17801.6	17333.1	21163.4	17461.5	15309.4	24792	7618.36	13369.3	21544.8	20430.8	26583.6	14198.5	12578.7	22366.7	28205.6	20329.6	20392.9	17736.5	22528.1	10821.3	23471.2	10873.9	12419.5	6591.05	7655.22	10626.1	8319.44	18487.9	15950.6										9.5904	16323.8	1028.34	17352.1	15295.4
9.6552	28360.7	7700.5	11305.3	15142.6	9058.97	16181.5	17969.1	17688.4	21634.6	17797.7	15605.4	25570	7874.71	14100.8	22497	21437.3	28313.2	15149.9	13047.1	23049.9	29960.7	21779.1	21618.7	18777.4	23126.2	11034.4	23629.3	11444.9	13001.9	6931.04	7836.07	10970.8	8503.6	18951.8	15983.4										9.6552	16943.8	1091.28	18035.1	15852.6
9.72	30833.6	7796.87	11423	15551.1	9222.98	17499.4	18508	18447.2	21392.8	18355.8	16195.1	26578.3	8090.58	14541.4	23396.4	22570.4	30390.8	16404	13797	23909.4	31810.6	23347	23461.8	19654.3	24095.6	11199.7	23975.3	12017.4	13740.2	7276.86	8189.99	11313.3	8619.61	19506.6	15796.6										9.72	17683.1	1168.78	18851.9	16514.3
9.7848	33664.6	8086.6	11775.4	16367.6	9446.43	18973	19826.8	19548.4	21675.7	18953.9	17194.8	27652.8	8346.82	14894	24117.4	23865.6	33007.2	17882.7	14734	24945.3	33763.3	25006.4	25813.6	20284.6	24956	11457	24534	12649.3	14731.9	7644.1	8575.43	11793.6	8712.44	20040.7	15629.1										9.7848	18587.2	1259.44	19846.6	17327.7
9.8496	36604.3	8401.28	12292.9	17293	9700.7	20413.4	21786.3	20723.6	21362.1	19553.1	18242.5	28767.8	8690.01	15385.2	24539.4	25280.7	35862.2	19301.2	15604	26081.6	35990.2	26574.2	28502.8	20871.2	25609.5	11925.2	25251.2	13340.4	15943.8	8029.45	8954.99	12499.2	8937.6	20586.9	15697.7										9.8496	19560	1355.99	20916	18204
9.9144	39567.2	8635.54	12737.7	18121	10077.7	21698.3	23755.2	22023.6	21999.8	20323.6	18823.2	29935.5	9175.14	15846.9	24859	26838.7	38409.9	20682.1	16405.8	27513.4	38725.8	27783	30981.4	21765.8	25930.9	12399.9	26006.4	14128.6	17134.9	8342.63	9413.02	13331.9	9348.15	21438.2	16047.9										9.9144	20577.4	1456.41	22033.8	19121
9.9792	42287.7	8972.83	13135.2	18851.2	10656.5	22440.5	25479.9	23532.4	22329.9	21423.2	19297.6	31355.8	9770.62	16340.6	25209.3	28518.4	40587.6	22040.1	17242.8	28964.9	42011.7	28810.1	33167.8	23026.8	25784.2	12799	26806.4	14944.3	18089.4	8668.94	9901.78	14174.5	10034.8	22551.9	16813.5										9.9792	21600.6	1552.8	23153.4	20047.8
10.044	44603	9473.43	13349.4	19374.1	11369.9	22558	26718	25146.6	22211.4	22814.1	19697.5	33146.7	10354.3	16813	25620.9	30321.3	42390.9	23368.5	18129.9	30402.2	45764.4	29715.3	35238.8	24439.2	25503	13164.6	27660.1	15712.9	18915.8	8903.4	10274.9	14783.9	10898.2	23531.6	18056.2										10.044	22583.6	1650.21	24233.8	20933.4
10.1088	46341.8	10118.8	13345.6	19599	11957.2	22546.9	27565.9	26623	21924.4	24327.4	19990.3	35016.7	10896.9	17325.4	26173.7	32291.8	43747.3	24779	19036.5	32025.3	49373.5	30457	37245.2	26024.5	25126.4	13410.7	28504.1	16672.1	19843.6	8933.94	10538.6	15039	11791.2	24245.8	19694.2										10.1088	23500.9	1744.09	25245	21756.8
10.1736	47116.6	10792.1	13408.3	19585.1	12208.9	22627.4	28281.8	28120.5	21774.3	25767	20221.4	36536.1	11417.1	18010.9	27006.2	34554.1	44592.3	26139.9	20107.1	33909.7	52333.5	30815.6	39289.1	27715.8	24587.4	13755.2	29454.9	17786.2	20904.9	8931.47	10881.7	15139.6	12536.2	24657.9	21346.3										10.1736	24351.8	1820.77	26172.6	22531
10.2384	46973.8	11331	13755.9	19914.3	12272.8	23002.7	29522.3	29694.8	22025.1	26920.8	20336.2	37620	11979.8	18899.8	28009.7	37061.7	44936.9	27387.2	21442.5	36180.2	54281	30610.7	41604.3	29763.5	24071.2	14296.1	30393.8	18864.2	22108.5	9081.89	11384.3	15282	13061.2	25085.6	22717.1										10.2384	25196.4	1874.98	27071.4	23321.4
10.3032	46433.4	11854.1	14284	20795.7	12711.5	23503.9	31601.2	31015.1	22677.4	27846.1	20576.8	38371.1	12717.5	19889.8	28620.8	39742.1	44864.5	28627.6	23140.1	38715.9	55085.7	30091.3	44091.2	32049	23670.1	15170.9	30855.9	19599.3	23251.8	9431.93	11896.3	15575.6	13533	25651.1	23806.6										10.3032	26050	1906.22	27956.2	24143.7
10.368	45690.7	12456.9	14881.3	21963	13758.3	24071.8	34203	32009.1	23595.4	28700.1	21194.8	38744.1	13644.2	20868.4	28631.1	42307.9	44532	29608.2	24972.9	41176.7	55000.6	29574.6	46243.2	34503	23395.6	16344.1	30636.6	19790.2	24233.6	9918.16	12347.2	15868.9	14210.4	26210	24749										10.368	26858.2	1915.86	28774	24942.3
10.4328	44826.4	13262.7	15420.8	23164.1	15226.1	24638.8	36736.1	32948.6	24629	29611.6	21852	38856	14664.8	21869.1	28307.3	44498.2	44087	29873.7	26731.3	43298.3	54110.3	29406	47985.8	36718.8	23202.2	17652.1	29675.3	19545.9	25210.2	10424.1	12679.3	16073.5	15125.2	27066.4	25693										10.4328	27573.4	1908.69	29482.1	25664.7
10.4976	44329.1	14307	16025	24177.4	16743.6	25016.7	38930.1	34328.1	25617.1	30903.4	22115.3	38889.8	15692.6	22852.4	28032.8	46296.9	43536.7	29406.3	28381.4	45336.7	52363.9	29516.7	49176.9	38506.4	22706.7	18769.4	28100.6	19098.7	25949.1	10905.1	13017.8	16124.9	16003.5	28413.5	26803.8										10.4976	28182.2	1897.57	30079.7	26284.6
10.5624	44243.5	15560.6	16765.6	25290.8	18039.6	25236.1	40819.8	36195	26467.9	32703.8	21753.8	38817.6	16405.4	23768.1	28030.7	48005.1	42595.8	28401.5	30014.8	47411.5	49793.5	29644.1	49870.7	39934.6	21543.4	19681.9	26215.3	18758.4	26062.5	11323.1	13508.3	16118.8	16669.4	30289.3	28060.8										10.5624	28685.7	1893.32	30579.1	26792.4
10.6272	44468.1	16852.3	17650.2	26574.2	19253.8	25325.1	42479.9	38109.8	27153.4	34799.4	20668.3	38403.8	16744.3	24279.1	28125.6	49771.6	40856.2	26735.3	31701.7	49464.4	46554.6	29347.2	49974.5	41507.5	19733.8	20832.8	24249.7	18579.4	25504.5	11626.6	14142	16253.3	17384.3	32337.4	29537.4										10.6272	29056.6	1900.47	30957.1	27156.1
10.692	44542.5	17995.1	18802	27720.1	20341.3	25508.7	43859	39773	27686.1	37179.1	19126.4	37405.1	16798.8	24463.5	27872.6	51127.3	38016.1	24418.1	33678.5	51246.4	42972.4	28266.7	49344.6	43476	17365.3	22222.8	22367.6	18248.9	24323.1	11721.3	14842.6	16489.9	18337.2	34419.8	31222.3										10.692	29233.7	1921.14	31154.9	27312.6
10.7568	43826.9	19396.3	20165.5	28314	21340.8	26184.7	44765.4	41034.9	28539.1	39615.6	17288.9	35863.1	16773	24520.5	26872.3	51458.4	34107.2	21574.2	36126.3	52670	39210.9	26411.6	47396.5	45629.6	14863.5	23810.6	20541.6	17622.2	22742.3	11655.3	15719.6	16631	19397.7	36785.2	32876.5										10.7568	29192.3	1946.36	31138.7	27246
10.8216	42182	21246.7	21739.6	28136.8	22156.3	27472.6	45041.9	42398	29936.8	42149.3	15599.2	33867.5	16637.6	24608.5	25139.2	50603	29339.9	18631.9	38846.2	53758.7	35242.2	24015	43938.1	47056.7	12682.9	25382.6	18751.9	16785.5	20635.3	11667	16909.7	16552.1	20390.6	39624.9	34318.9										10.8216	28955.6	1977.82	30933.4	26977.8
10.8864	39583.7	23166.6	23203.8	27586.2	22877	28769.9	45025.2	43959.4	31800.7	44801.6	14092.7	31557.2	16341.8	24541	22991.4	48924.9	24253.2	15843.8	41586.1	54361.4	30986.9	21513.8	39391.4	46919.8	10943.4	26509.9	16888.7	15825.9	18152.1	11735.5	18248.7	16367	21298.2	42877.3	35698										10.8864	28532.1	2032.95	30565.1	26499.2
10.9512	36321.7	24986.3	24467.5	27335.9	23560.4	29538.7	44437.4	45082.4	33915.6	46946.7	12559.2	29043.7	15915.5	24179.5	21248.8	47083.2	19766.8	13302.1	44461.5	54363.6	26585.9	19060.5	34354.5	45343.5	9519.48	27384.2	15010.2	14827	15661.7	11725.8	19682.7	16127.8	22048.3	46574.2	37163.1										10.9512	27988.2	2115.94	30104.1	25872.2
11.016	32894.9	26771.3	25684.8	27717.6	24154.5	29232.5	43269.1	45167.7	36132.6	47883.6	10910.5	26483.4	15279.6	23579.3	20278.9	44781.7	16404.6	11235.6	47366.4	53826.1	22389.3	16462.2	29421.9	43049.8	8261.51	27997.4	13285.6	13792.9	13324.2	11463.6	21154.9	15799.9	22466.5	50408.5	38705.9										11.016	27344	2213.21	29557.2	25130.8
11.0808	29501.5	28730.7	26876.3	28760.6	24682.6	28038.5	41951.5	44462.1	38414.6	47762.2	9274.1	24083.7	14509.5	22787	19767.5	41761.3	14075.3	9733.24	49668.1	52476.3	18871	13779.8	24809.4	40379.4	7205.53	28376.1	11868.3	12733	11158.8	10985.3	22466.1	15387	22381.2	53785.1	40143.5										11.0808	26618.5	2305.19	28923.7	24313.3
11.1456	26423.6	30783.2	28569.2	29761.9	25408.1	26727.8	40721.7	43676.7	41124.6	46807.6	7676.58	21555.6	13554.2	21753.5	19240.7	37683	12393.3	8766.34	50840.9	50116.9	16152	11293.1	20863.1	37163.3	6534.68	28545.5	10800.8	11584.5	9260.63	10499.6	23494.5	14878.1	21963.5	56262.9	41011.3										11.1456	25825.5	2376.78	28202.3	23448.7
11.2104	23952.3	32654.3	30684	29807.8	26440.1	25742.4	39358.6	43227.5	44426.2	45420.9	6336.64	18604	12511.4	20520.9	18314.8	33196.7	11129.6	8126.85	50448.7	46971.9	14176.7	9154.1	17716.4	33419.4	6125.96	28671.7	9865.34	10333.4	7725.22	10158.6	24098.9	14229.7	21389.6	57164.5	41375.5										11.2104	24956.6	2424.04	27380.6	22532.6
11.2752	22032.5	34292.3	32812.9	29169.3	27581.9	25057.5	38018.9	43427.8	47869.8	43820.7	5370.02	15608.5	11319.7	19139.8	17067.3	28690.5	10073.3	7602.6	48408.1	43266.1	12796.4	7378.72	15178	29322.7	5801.65	28838.6	9060.08	9100.95	6666.21	9780.74	24341.8	13531.4	20684.2	56187.2	41529.8										11.2752	24023.7	2449.63	26473.3	21574
11.34	20210.2	35720.5	34794.4	28165.1	28645.9	24454.8	36546.4	43498.2	49630.9	41459.4	4696.39	13049	9846.84	17889.3	15675.3	24417.8	9199.92	7069.7	44957.9	39041.5	11876.2	6005.43	12981.2	25345.5	5590.4	28619.6	8434.86	7960.62	5971.49	9216.72	24385.1	12753.3	19950.9	53546	41752.6										11.34	22953.1	2437.07	25390.2	20516.1
11.4048	18131.2	36741.7	36629.8	26885.4	29176.6	23564.7	35011.6	42779.3	48463.8	38188.2	4135.34	11067.7	8398.79	16957.9	14295.6	20590.8	8595.97	6542.26	40418.7	34750.9	11203.1	5001.64	11025.4	21460.4	5405.01	27800.5	7979.39	6992.65	5407.56	8402.2	24371.5	11855.4	19103.3	49765.3	42038.5										11.4048	21689.7	2376.67	24066.3	19313
11.4696	15744.5	37151.4	38409.6	25061.5	28499.7	22323	33314.3	41020.1	45318.3	34283.2	3609.96	9453.82	7092.76	16012.6	12995.1	17439.4	8127.99	5991.69	35449.9	30373	10636.3	4285.77	9280.86	17922.1	5202.39	26447.2	7555.68	6267.53	4831.99	7532.98	24344.3	10757.1	18125.3	45305	42116.9										11.4696	20236.7	2282.32	22519	17954.3
11.5344	13267.9	36784.1	40221.9	22562.4	27015.1	20818.8	31059.7	38501	42376.7	30304.8	3066.74	8063.08	6082.05	14790.8	11703.7	14804.4	7660.2	5471.79	30784.7	25921	10159.6	3784.41	7547.06	14919.8	4919.08	24987.3	7228.66	5642.89	4269.34	6918.95	24097.1	9674.22	17292.8	40543.1	41533.2										11.5344	18708	2181.53	20889.5	16526.4
11.5992	11040.3	35902.9	41592.7	19635	25329.4	19573	28219.6	35654.2	40707.3	26395.3	2627.18	6894.93	5304.12	13208.6	10519.9	12498.2	7263.43	4989.89	26700.9	21744.3	9759.51	3412.08	5997.52	12443	4420.04	23753.7	7109.06	5135.64	3731.94	6684.05	23484.7	8737.19	16638.8	36048.8	39860.4										11.5992	17229.1	2086.45	19315.5	15142.6
11.664	9266.61	34968.1	42566.4	16979.3	23777.9	18913	25006.4	33015	40096.9	22724.7	2291.93	6036.32	4684.12	11445.3	9442.37	10396.4	6984.19	4531.44	23231.8	18210.1	9418.86	3070.41	4971.97	10363.8	3851.61	22729.1	7088.69	4828.72	3255.29	6651.27	22328.3	7990.32	15990.7	31621	37656.8										11.664	15896.7	2005.32	17902	13891.4
11.7288	7899.98	33964.9	43328.5	15080	22277.5	18618.6	22027.6	30815.1	39372.5	19392	2077.89	5429.78	4157.35	9876.34	8423.69	8546.33	6728.91	4030.63	20203.9	15602.8	9142.67	2727.15	4365.2	8639.66	3423.94	21859.1	6915.32	4526.15	2808.64	6482.77	20706	7427.46	15259.2	27079.9	35606.9										11.7288	14709.3	1937.74	16647	12771.5
11.7936	6809.94	32603.7	43602.2	13854.7	20623.3	18421.8	19474.9	28969.6	37476	16618.6	2016.36	5044.67	3696.62	8832.25	7326.36	7117.78	6441.18	3533.48	17546.2	13597.1	8929.51	2490.2	4021.57	7159.32	3261.38	21081.1	6541.32	4197.38	2344.1	6002.17	18790.1	6827.73	14428.7	22311.7	33965.3										11.7936	13598.8	1864.25	15463.1	11734.6
11.8584	6000.5	30431.2	43131.4	12952.7	18979.8	18159.7	17282.6	27420.2	34634.2	14451.5	1984.71	4783.22	3319.45	8201.47	6291.71	6090.41	6189.12	3118.55	15374.5	11922.2	8794.41	2307.37	3777.85	5969.03	3304.52	20409.4	6069.37	3842.49	1958.53	5435.38	16756.2	6099.1	13560.6	17918.6	32474.5										11.8584	12554.2	1776.05	14330.2	10778.1
11.9232	5506.12	27626.2	41423	12099.2	17680.7	17675.5	15637.7	26034.8	31862.4	12675.7	1940.01	4513.15	2894.88	7733.39	5472.49	5198.56	5960.57	2816.77	13601.2	10435.2	8718.2	2215.45	3419	5097.3	3383.3	19656.6	5544.98	3494.39	1745.29	4805.94	14842.3	5364.81	12688.4	14429.5	30391.7										11.9232	11559.6	1669.38	13228.9	9890.18
11.988	5137.06	24483.8	38849.5	11399.9	16712.4	16935.2	14296.4	25032.7	29802.9	11288.7	1881.24	4222.53	2463.48	7216.03	4826.23	4397.61	5765.45	2667.46	12102.2	9085.52	8726.52	2218.73	2872.02	4402.64	3434.93	18588.5	4936.35	3188.22	1726.2	4151.56	13157.1	4731.18	11838.4	11830.6	27769										11.988	10632.5	1555.72	12188.2	9076.81
12.0528	4781.49	21389.6	36176.6	10681.1	15907	16082.9	12914.9	24848.1	27877.4	10064.3	1820.12	3900.45	2088.51	6529.86	4385.81	3665.91	5588.48	2533.81	10849.9	7916.44	8728.24	2232.45	2341.07	3778.22	3437.68	16828.1	4265.36	2951.42	1798.62	3611.58	11728.1	4034.81	10946	9761.45	24944.9										12.0528	9754.02	1447.73	11201.8	8306.29
12.1176	4468.05	18680.7	33840.5	9938.01	14641.9	15431.2	11382.6	24901.4	25550.7	8711.4	1780.78	3693.88	1831.14	5737.88	4097.08	3126.12	5437.38	2372.16	9859.58	7026.41	8680.56	2187.82	1930.87	3245.62	3309.14	14487.9	3619.22	2699.71	1873.74	3206.05	10527.5	3286.53	9999.26	8110.05	22255.1										12.1176	8912.22	1346.43	10258.7	7565.8
12.1824	4204.22	16455	32047.8	9289.36	12885.5	14976.6	10052.9	24498.1	22728.9	7364.49	1775.34	3655.77	1682.54	4825	3899.22	2796.27	5331.07	2189.67	9001.11	6374.83	8560.64	2148.44	1653.6	2900.2	3101.79	12121.1	3141.76	2360.36	1911.81	2898.41	9370.99	2611.81	8949.95	6740.85	19780.8										12.1824	8122.46	1250.26	9372.73	6872.2
12.2472	3968.92	14699.5	30235.2	8659.48	10942	14630.2	8884.92	23135	19888.4	6189.3	1823.05	3759.86	1597.99	4006.61	3828.34	2617.77	5263.98	2062.22	8172.02	5907.62	8412.64	2166.86	1525.55	2711.57	2989.89	10004.7	2903.68	2046.86	1945.49	2613.4	8186.76	2070.75	7911.78	5592.46	17528.6										12.2472	7396.67	1148.25	8544.92	6248.42
12.312	3739.07	13244.7	27930.1	8139.63	9268.06	14058.2	7705.32	21089.6	17838.5	5259.93	1902.13	3877.06	1598.35	3526.01	3912.97	2502.37	5208.05	1953.18	7360.6	5563.17	8275.86	2273.47	1532.94	2514.87	3011.21	8320.63	2830.93	1858.19	1964.28	2305.89	7029.95	1722.43	7051.46	4601.54	15785.8										12.312	6764.47	1042.3	7806.76	5722.17
12.3768	3512.38	11950.1	25377.4	7812.85	8056.36	13160.8	6498.9	19133	16397.1	4608.02	1943.26	3908.69	1626.06	3287.19	4078.33	2380.17	5143.6	1756.16	6650.3	5319.6	8113.12	2391.55	1589.81	2373.49	3063.13	7014.17	2724.06	1816.53	1970.69	2106.74	5952.42	1541.82	6276.68	3777.34	14498.6										12.3768	6223.16	942.517	7165.67	5280.64
12.4416	3280.18	10918.5	22803.3	7464.46	7089.67	11948	5541.12	17669.8	15091	4220.25	1915	3777.74	1623.15	3249.9	4196.25	2288.48	5067.51	1493.81	5996.23	5251.05	7933.82	2525.44	1672.54	2323.27	3042.44	5918.43	2504.29	1816.55	2028.24	2097.57	5033.73	1462.37	5479.64	3172.1	13576.2										12.4416	5756.34	852.391	6608.74	4903.95
12.5064	3093.25	10229.8	20356.2	7002.68	6332.51	10662.5	4973.26	16206.3	13484.2	4096.45	1869.59	3533.37	1568.27	3246.8	4203.94	2223.58	4975.07	1331.85	5383.55	5283.03	7802.12	2691.08	1701.28	2307.06	2829.76	4846.46	2250.61	1836.29	2152.85	2077.95	4330.16	1435.96	4734.35	2803.39	12886.8										12.5064	5335.49	766.102	6101.59	4569.39
12.5712	2995.04	9752.31	18256.1	6526.55	5699.37	9413.95	4745.44	14561.6	11435.7	4145.34	1826.11	3346.31	1483.61	3204	4193.96	2155.76	4912.59	1225.84	4835.97	5314.03	7719.06	2770.25	1658.54	2256.81	2549.67	3824.28	1998.02	1897	2257.16	1994.59	3802.41	1410.32	4119.1	2641.68	12087.2										12.5712	4943.31	682.431	5625.74	4260.88
12.636	2980.83	9364.92	16325.7	6159.96	5189.63	8149.86	4676.88	12941	9368.97	4273.02	1764.57	3296.63	1378.8	3116.04	4184.33	2018.02	4745.43	1175.13	4398.96	5304.51	7704.2	2727.43	1659.79	2133.94	2342.91	3067.89	1737.64	1925.94	2316.76	1877.72	3371.21	1388.59	3677.02	2665.2	10995.9										12.636	4583.01	602.98	5185.99	3980.03
12.7008	3035.73	9015.07	14456.3	6094.22	4759.38	6998.32	4449.49	11504.9	7737.69	4413.38	1691.71	3299.38	1300.17	3034.64	4033.34	1868.44	4419.37	1193.69	4106.08	5070.93	7715.71	2609.46	1639.08	1988.66	2148.06	2609.83	1497.74	1896.28	2299.2	1715.49	3048.41	1383.52	3355.63	2788.43	9790.35										12.7008	4256.23	533.116	4789.35	3723.11
12.7656	3094.89	8573.4	12721.5	6132.67	4408.55	5984.63	4037.86	10404.1	6561.98	4397.81	1624.51	3229.63	1283.24	3000.93	3704.93	1800.66	4047.46	1221.96	3847.56	4635.88	7684.86	2465.93	1482.38	1889.49	2047.65	2308.06	1299.59	1882.67	2206.74	1545.19	2838.01	1383.74	3097.44	2894.27	8730.51										12.7656	3956.31	475.302	4431.61	3481
12.8304	3200.38	7965.26	11077.8	6221.71	4170.28	5126.08	3565.12	9603.55	5715.63	4103.35	1582.89	3075.78	1301.37	2946.17	3379.6	1739.92	3852.1	1263.17	3580.59	4130.81	7619.37	2306.47	1283.34	1839.51	2083.19	2063.53	1130.91	1905.05	2095.97	1424.18	2732.17	1484.69	2897.21	2923.82	7934.48										12.8304	3695.01	426.412	4121.42	3268.6
12.8952	3333.18	7211.51	9558.63	6195.82	4012.16	4461.2	3297.82	9103.74	5168.83	3666.59	1508.63	2866.49	1297.89	2799.46	3193.57	1588.38	3907.5	1326.53	3336.06	3643.54	7540.55	2163.19	1104.59	1719.18	2130.19	1863.93	1029.45	1955.23	1960.14	1348.47	2740.12	1650.76	2677.59	2911.57	7382.87										12.8952	3475.87	387.573	3863.44	3088.29
12.96	3422.88	6417.18	8316.55	6150.8	3849.49	3980.33	3136.73	8809.04	4756.89	3216.53	1461.94	2697.32	1330.99	2535.95	3136.33	1452.72	3988.89	1392	3074.74	3276.87	7442.52	2038.38	1023.25	1676.37	2144.11	1688.44	1023	1992.85	1842.32	1346.76	2768.35	1772.27	2399.59	2952.96	7074										12.96	3302.55	358.841	3661.39	2943.71
13.0248	3482.19	5638.89	7254.97	6285.59	3531.01	3692.55	3035.46	8585.06	4274.57	2836.43	1392.95	2647.08	1379.57	2341.6	3076.39	1325.1	3979.26	1459.85	2904.2	3027.63	7297.69	1898.19	980.47	1686.09	2178.43	1582.12	983.838	1896.93	1734.53	1340.28	2787.93	1823.82	2162.54	3043.72	6897.19										13.0248	3155.54	337.946	3493.49	2817.6
13.0896	3531.64	5012.79	6305.87	6699.23	3141.41	3499.55	3027.27	8355.11	3637.12	2598.18	1318.32	2761.16	1348.84	2250.34	2968.39	1205.92	3954.28	1439.33	2809.09	2991.2	7100.1	1791.26	935.445	1725.3	2178.44	1462.65	929.778	1708.76	1621.47	1305.05	2807.77	1860.89	2078.01	3012.99	6623.85										13.0896	3028.48	323.389	3351.87	2705.09
13.1544	3611.95	4671.71	5528.3	7176.27	2815.02	3364.9	3063.86	7908.2	2957.31	2437.82	1268.62	3067.23	1265.16	2159.38	2890.95	1087.23	3964.36	1281.93	2704.59	3041.43	6905.31	1725.81	933.492	1724.57	2159.13	1376.5	911.837	1556.71	1542.69	1253.23	2758.74	1838.74	2165.72	2990.03	6264.51										13.1544	2924.95	312.537	3237.49	2612.41
13.2192	3720.91	4532.34	4927.47	7413.16	2617.62	3346.97	3122.13	7250.66	2490.83	2266.7	1220.64	3500.34	1221.19	2074.51	2966.41	1020.06	3909.2	1099.94	2532.41	3105.26	6765.65	1618.87	1010.08	1657.69	2289.9	1327.5	879.162	1469.65	1565.44	1207.24	2654.63	1683.63	2360.99	3081.21	5898.59										13.2192	2851.68	301.804	3153.49	2549.88
13.284	3767.73	4339.69	4527.73	7453.62	2590.48	3388.36	3214.78	6560.6	2209.61	2120.9	1195.2	3891.76	1223.16	1968.55	3192.57	981.129	3844.26	1050.38	2260.37	3134.28	6674.37	1434.87	1014.7	1676.36	2464.91	1271.7	819.934	1494.95	1673.28	1169.98	2503.42	1526.02	2573.25	3204.25	5541.11										13.284	2798.81	291.6	3090.41	2507.21
13.3488	3705.09	4101.69	4258.01	7260.43	2651.5	3437.48	3425.9	6135.44	1923.93	1952.02	1185.48	4091.98	1225.56	1927.16	3445.61	894.961	3911.82	1079.95	2092.06	3127.86	6611.9	1204.52	926.133	1685.81	2511.7	1228.82	788.289	1574.55	1837.63	1194.37	2325.25	1452.21	2690.04	3334.69	5265.09										13.3488	2756.14	284.199	3040.34	2471.94
13.4136	3557.2	3808.16	3948.21	7050.74	2740.16	3427.72	3676.35	5933.98	1589.88	1691.2	1189.42	4037.15	1159.73	1979.98	3676.63	817.872	4020.88	1100.24	2130.62	3233.57	6570.07	1046.01	823.669	1645.21	2398.72	1244.14	814.459	1617.77	1975.36	1272.2	2211.73	1418.67	2661.56	3493.96	4948.54										13.4136	2711.76	278.686	2990.45	2433.08
13.4784	3400.57	3613.36	3560.66	7138.72	2688.66	3348.13	3829.83	5715.13	1278.84	1380.62	1202.98	3779.12	1058.48	2070.8	3796.28	704.823	4121.67	1165.39	2323.65	3308.56	6533.9	978.313	805.079	1597.6	2118.71	1321.66	860.888	1662.46	2076.73	1301.73	2167.34	1435.29	2483.55	3699.57	4442.3										13.4784	2656.33	275.453	2931.78	2380.87
13.5432	3361.69	3439.48	3138.96	7525.62	2363.17	3157.56	3862.95	5453.01	1097.62	1151.99	1229.08	3399.58	965.753	2200.06	3733.81	532.823	4161.56	1254.22	2473.61	3230.38	6483.6	933.76	861.866	1582.06	1765.49	1356.84	875.276	1730.11	2223.9	1278.05	2177.84	1495.19	2234.65	3784.82	3862.89										13.5432	2582.26	275.257	2857.52	2307.01
13.608	3411.72	3153.26	2708.75	8106.38	1953.84	2920.72	3866.22	5212.25	1116.66	1004.6	1235.83	3017.02	874.646	2392.01	3533.52	422.118	3911.44	1298.54	2496.44	3079.18	6364.08	931.821	954.116	1679.42	1555.01	1382.61	844.887	1763.72	2425.92	1227.96	2230.7	1443.65	2009.55	3608.16	3414.31										13.608	2501.46	276.912	2778.37	2224.55
13.6728	3703.92	2836.61	2422.92	8947.28	1661.36	2693.51	3932.75	5003.37	1134.81	939.524	1213.3	2771.63	851.942	2579.47	3369.09	369.893	3443.22	1352.54	2511.83	3023.66	6203.33	974.792	1084.09	1872.1	1480.81	1462.38	765.617	1779.36	2471.98	1182.78	2283.72	1308.8	1889.64	3262.59	3109.06										13.6728	2454.11	285.881	2739.99	2168.22
13.7376	4425.04	2552.28	2331.65	9769.38	1475.12	2498.75	4112.8	4782.98	1031.05	940.304	1178.44	2724.4	849.513	2842.74	3351.1	370.151	2987.23	1459.42	2563.93	3073.94	6067.52	1087.76	1262.36	2082.84	1424.52	1536.55	628.819	1782.71	2430.12	1126.3	2267.22	1164.47	1854.46	2952.79	2931.01										13.7376	2454.85	302.068	2756.91	2152.78
13.8024	5477.01	2300.19	2359.83	10073.3	1391.5	2286.8	4436.43	4551.33	914.237	998.81	1184.13	2833.74	836.762	3204.06	3542.98	396.68	2653.09	1583.87	2568.32	3146.57	5944.15	1226.9	1428.31	2143.43	1370.25	1547.8	527.772	1768.76	2598.02	1010.01	2175.7	1051.66	1856.5	2841.61	2798.58										13.8024	2486.55	315.684	2802.23	2170.86
13.8672	6315.92	2049.67	2442.96	9657.69	1426.04	2060.59	4776.23	4168.06	1000.22	1166.89	1200.33	3016.28	848.937	3640.87	3930.33	369.586	2392.84	1614.53	2450.3	3197.02	5798.51	1382.35	1446.46	2045.93	1360.1	1511.73	446.637	1696.44	3017.34	904.078	1998.65	1005.7	1830.37	2799.72	2721.99										13.8672	2505.47	317.099	2822.56	2188.37
13.932	6478.57	1780.12	2428.65	8968.91	1638.87	1939.99	5224.65	3721.96	1252.8	1457.34	1197.24	3156.72	866.615	4058.91	4372.82	314.213	2254.01	1568.38	2231.55	3271.77	5615.46	1455.99	1348.15	1971.59	1428.26	1498	387.162	1581.21	3445.32	880.927	1788.04	997.836	1771.96	2705.59	2810.91										13.932	2510.59	310.5	2821.09	2200.09
13.9968	6045.97	1625.2	2267.38	8317.83	2055.04	1876.58	5619.03	3239.07	1565.57	1835.28	1223.61	3166.59	847.087	4340.65	4535.89	272.478	2212.57	1470.49	1968.41	3341.36	5416.23	1387.09	1175.4	1994.73	1511.07	1480.55	355.626	1486	3635	949.623	1634.43	983.974	1721.29	2494.61	3038.02										13.9968	2488.28	298.282	2786.56	2190
Distance	070620_Emb30 30minAux_01	070620_Emb30 30minAux_10	070620_Emb30 30minAux_23	070620_Emb30 30minAux_26	070620_Emb30 30minAux_33	070620_Emb30 30minAux_34	072020_Emb30 30minAux_01	072020_Emb30 30minAux_02	072020_Emb30 30minAux_03	072020_Emb30 30minAux_06	072020_Emb30 30minAux_07	072020_Emb30 30minAux_08	072020_Emb30 30minAux_11	072020_Emb30 30minAux_13	072020_Emb30 30minAux_14	072020_Emb30 30minAux_15	072020_Emb30 30minAux_23	072020_Emb30 30minAux_24	072020_Emb30 30minAux_26	072020_Emb30 30minAux_27	072020_Emb30 30minAux_28	072020_Emb30 30minAux_29	072020_Emb30 30minAux_30	072020_Emb30 30minAux_36	072020_Emb30 30minAux_37	072020_Emb30 30minAux_42	072020_Emb30 30minAux_44	072020_Emb30 30minAux_45	072020_Emb30 30minAux_47	072020_Emb30 30minAux_48	072020_Emb30 30minAux_53	072020_Emb30 30minAux_54	072020_Emb30 30minAux_56	072020_Emb30 30minAux_59	072020_Emb30 30minAux_61	072020_Emb30 30minAux_63	072020_Emb30 30minAux_64	072020_Emb30 30minAux_67	072020_Emb30 30minAux_68	072020_Emb30 30minAux_71	072020_Emb30 30minAux_72	072020_Emb30 30minAux_73	072020_Emb30 30minAux_75		Distance	Average Value	Standard Error	Std Error Band ASPM-1
	With Auxin	With Auxin	With Auxin	With Auxin	With Auxin	With Auxin	With Auxin	With Auxin	With Auxin	With Auxin	With Auxin	With Auxin	With Auxin	With Auxin	With Auxin	With Auxin	With Auxin	With Auxin	With Auxin	With Auxin	With Auxin	With Auxin	With Auxin	With Auxin	With Auxin	With Auxin	With Auxin	With Auxin	With Auxin	With Auxin	With Auxin	With Auxin	With Auxin	With Auxin	With Auxin	With Auxin	With Auxin	With Auxin	With Auxin	With Auxin	With Auxin	With Auxin	With Auxin		(n=43)	With Auxin	With Auxin	With Auxin Top	With Auxin Bot
	Raw Intensity	Raw Intensity	Raw Intensity	Raw Intensity	Raw Intensity	Raw Intensity	Raw Intensity	Raw Intensity	Raw Intensity	Raw Intensity	Raw Intensity	Raw Intensity	Raw Intensity	Raw Intensity	Raw Intensity	Raw Intensity	Raw Intensity	Raw Intensity	Raw Intensity	Raw Intensity	Raw Intensity	Raw Intensity	Raw Intensity	Raw Intensity	Raw Intensity	Raw Intensity	Raw Intensity	Raw Intensity	Raw Intensity	Raw Intensity	Raw Intensity	Raw Intensity	Raw Intensity	Raw Intensity	Raw Intensity	Raw Intensity	Raw Intensity	Raw Intensity	Raw Intensity	Raw Intensity	Raw Intensity	Raw Intensity	Raw Intensity			Raw Intensity	Raw Intensity	Raw Intensity	Raw Intensity
0	1073.9	14325.5	10465.3	9518.6	4206.67	2373.85	1879.52	6240.41	1044.28	1489.07	6905.97	7982.62	8438.3	3253.84	2322.43	523.357	3078.38	2793.1	2811.41	10371.3	2927.13	6639.06	4050.92	1439.6	737.434	2625.45	1367.41	1593.02	1281.67	7155.86	2377.25	2612.6	2992.68	5830.73	5579.41	8701.23	8498.55	281.835	928.2	12389.7	11419	2223.97	12340.2		0	4816.06	586.984	5403.05	4229.08
0.0648	1083.52	14854.9	10918.2	8826.03	3904.9	2372.82	2303.47	6428.8	1001.74	1575.03	7493.6	8017.86	8415.89	3563.41	2483.9	518.453	3263.71	2746.46	2959.35	10748.7	2769.66	6709.29	4208.97	1446.87	706.725	2701.01	1448.64	1680.41	1167.16	7112.82	2620.51	2751.03	2983.39	5841.78	5493.69	8942.92	8863.79	253.646	974.698	12673	11575.7	2513.67	12723.7		0.0648	4921.95	599.149	5521.1	4322.8
0.1296	1157.71	15042	11050.8	8530.1	3866.15	2378.36	2566.41	6748.46	924.458	1692.46	7836.52	8118.52	8377.85	4012.52	2588.05	522.478	3499.85	2807.34	2991.99	10999.8	2721.64	6771.69	4421.46	1628.54	675.094	2786.04	1472.96	1794	1009.44	7213.86	2907.06	2826.38	3046.48	5807.41	5494.57	9111.55	9054.33	257.51	991.229	12899.4	11741.2	2728.33	13189.3		0.1296	5029.33	606.996	5636.33	4422.33
0.1944	1237.98	14869.5	10873.4	8699.42	3940.48	2497.77	2717.24	7186.71	847.163	1840.55	7811.58	8155.23	8248.79	4439.9	2560.99	510.98	3826.22	2874.02	2962.42	11204.6	2831.05	6784.91	4639.56	1887.41	659.573	2882.68	1543.3	1825.69	858.501	7610.19	3223.06	2866.31	3004.73	5731.19	5595.28	9187.52	9251.96	281.63	1005.79	13014.2	11913	3034.46	13530.9		0.1944	5127.16	608.683	5735.84	4518.47
0.2592	1315.88	14858.9	10546.7	9334.11	4056.78	2685.94	2803.54	7684.06	876.478	2033.68	7527.03	8069.34	8245.51	4787.61	2512.61	490.77	4275.44	3037.93	2962.87	11605.2	2982.3	6774.14	4786.28	2082.68	723.096	2991.12	1647.04	1777.53	890.883	8138.85	3550.49	2886.12	2918.27	5639.37	5902.96	9248.66	9608.62	300.588	1080.62	13013.1	12084.4	3493.17	13644.8		0.2592	5252.92	610.646	5863.56	4642.27
0.324	1486.56	15333.7	10264.2	10304.9	4244.88	2867.19	2900.63	8158.23	1084.27	2203.63	7227.72	8015.16	8259.96	5094.73	2533.1	480.609	4792.83	3339.84	3035.99	12207.2	3060.28	6799.84	4800.43	2198.6	903.272	3073.85	1792.58	1719.12	1119.63	8620.62	3807.87	2913.16	2872.8	5585.64	6328.06	9358.71	9935.2	299.499	1192.42	12954	12229.8	4022.8	13651.6		0.324	5420.35	617.274	6037.63	4803.08
0.3888	1760.03	16110.6	10257.9	11375	4489.31	2984.63	3016.64	8635.23	1366.49	2224.89	7094.97	8187.46	8059.72	5307.4	2669.88	466.801	5288.59	3711.2	3151.03	12725.4	3078.51	6955.83	4840.48	2274.75	1185.47	3104.39	1901.06	1721.84	1436.72	8866.1	3985.5	3025.14	2824.01	5620.42	6750.86	9471.2	10151.5	285.086	1270.78	12922.3	12362.1	4636.73	13740		0.3888	5611.49	628.647	6240.13	4982.84
0.4536	1952.23	16747.8	10363.8	12425.8	4768.24	3080.68	3050.75	9034.61	1771.47	2149.34	7203.85	8518.72	7548.9	5425.27	2837.63	438.112	5676.41	4107.23	3244.18	13003	3163.54	7253.35	5022.67	2369.12	1416.96	3089.33	1959.9	1808.98	1727.72	8779.21	4131.87	3056.19	2757.97	5737.96	7030.21	9530.7	10309.8	260.851	1303.23	12946.1	12450.1	5223.94	13915.4		0.4536	5781.23	639.528	6420.76	5141.7
0.5184	1999.38	17001.7	10403.6	13303.1	5099.6	3330.1	2989.95	9359.2	2291.32	2058.83	7500.55	8720.97	6866.57	5542.25	3009.84	426.201	5998.6	4447.34	3264.64	13021.7	3463.25	7654.92	5223.32	2471.59	1581.46	3114.48	1880.71	1944.07	1955.59	8413.05	4292.34	3037.08	2796.72	5890.64	7196.25	9470.77	10599	241.445	1340.02	12974.8	12482	5746.88	14154.4		0.5184	5920.01	644.964	6564.97	5275.04
0.5832	1951.57	16937.3	10219	14184.7	5569.07	3787.89	2852.93	9535.67	2920.76	2012.28	7879.33	8710.3	6192.99	5770.5	3204.55	443.898	6256.14	4795.26	3305.1	13174.7	3962.82	8176.6	5381.28	2591.98	1864.04	3243.1	1747.4	2019.04	2103.21	7956.1	4389.04	3031.52	2894.33	6053.84	7562.62	9379.69	11125.4	262.524	1411.38	12968.1	12581	6229.39	14443		0.5832	6071.66	648.816	6720.48	5422.84
0.648	1994.93	16568.5	9813.75	15339.7	6095.57	4323.61	2836.59	9725.28	3562.41	2038.2	8221.57	8548.91	5596.7	6105.91	3380.56	467.957	6427.01	5089.35	3407.91	13382.6	4492.87	8834.16	5543.36	2653.66	2401.29	3491.57	1638.06	1982.01	2273.74	7595.68	4396.95	2985.83	2932.7	6180.65	8028.61	9345.43	11904.7	331.458	1508.56	13020.1	12687.6	6724.95	14742.6		0.648	6247.06	654.495	6901.56	5592.57
0.7128	2142.6	16124.7	9389.27	17037.1	6600.32	4784.3	2943.7	9919.18	4190.69	2144.33	8449.73	8325.3	5191.34	6414.71	3537.41	494.608	6432.71	5303.97	3529.5	13614.5	4916.98	9585.5	5666.73	2661.54	3069.49	3765.91	1648.17	1836.88	2480.94	7341.61	4361.09	2936.73	2963.94	6202.31	8395.97	9409.31	13087.6	432.137	1659.64	13190	12718.4	7330.55	15125.4		0.7128	6450.16	669.698	7119.86	5780.46
0.7776	2442.45	15951.3	9177.41	18889.3	6925.5	5138.18	3130.8	10121	4806.3	2275.65	8608.41	8265.94	4972.17	6665.76	3608.46	525.493	6317.92	5564.1	3687.54	13832.2	5297.22	10262.1	5772.29	2671.12	3500.97	3979.97	1818.96	1666.18	2781.22	7114.36	4405.81	2922.79	3012.37	6101.94	8650.96	9527.05	14226.7	604.866	1923.11	13530.9	12632.9	7941.53	15523.6		0.7776	6669.18	691.613	7360.8	5977.57
0.8424	2864.29	15966.2	9409.38	20686.2	7136.61	5453.34	3430.41	10332	5374.2	2321.91	8805.9	8479.19	4881.82	6768.15	3564.95	551.602	6147.55	5858.38	3807.24	14141.5	5774.88	10813.2	5897.89	2687.1	3499.91	4146.26	2012.13	1597.07	3250.04	6983.65	4610.6	3067.33	3139.08	5990.46	8954.99	9722.68	14750.3	836.25	2316.38	14042.6	12504.1	8490.54	15798.6		0.8424	6903.88	713.671	7617.55	6190.21
0.9072	3323.76	15759.7	10144.9	22114.8	7335.96	5857.59	3807.65	10487.3	6028.21	2349.4	9057.52	8812.58	4849.47	6689.2	3427.04	549.299	6042.15	6096.15	3855.58	14564.1	6152.92	11369	6022.67	2647.4	3337.16	4313.52	2113.89	1711.49	3702.78	7003.4	4872.01	3398.9	3351.88	5886.94	9196.96	9998.49	14853	1089.51	2794.27	14750.2	12502.7	8991.26	15907.9		0.9072	7142.34	731.506	7873.85	6410.84
0.972	3711.29	15361.5	11305.2	22988.7	7812.25	6390.21	4210.61	10807.2	6898.89	2473.72	9370.18	9130.71	4852.02	6592.34	3323.91	540.087	6116.03	6140.07	3929.74	15044.8	6264.96	11931.1	6187.25	2582.38	3222.72	4479.9	2069.74	1917.42	3920.87	7238.83	5059.52	3763.46	3599.54	5788.12	9317.33	10324.1	14880.8	1325.02	3246.5	15645	12585	9494.72	15933		0.972	7390.16	746.859	8137.02	6643.3
1.0368	3833.6	15130	12508	23287.9	8462.61	6896.62	4562.92	11240.6	7841.33	2740.25	9674.79	9413.45	4892.19	6575.92	3319.7	550.457	6373.04	6071.18	4051.35	15496.2	6206.39	12400.4	6298.21	2611.78	3179.79	4599.63	1938.87	2079.93	3918.87	7668.8	5086.33	3978.53	3819.37	5798.63	9534	10695.7	15144.8	1533.43	3585.94	16670.9	12645	9906.3	16106.5		1.0368	7635.59	763.555	8399.14	6872.03
1.1016	3773.15	15322.2	13282.5	23021.2	9145.08	7006.17	4809.52	11751.4	8713.33	3008.4	9824.93	9735.29	4993.56	6684.1	3405.61	565.601	6782.72	6071.99	4251.54	15831.5	6288.04	12883.5	6425.9	2735.49	3056.44	4727.02	1907.07	2170.43	3865.19	8051.17	4963.59	3945.23	4000.12	6005.1	9888.59	11024.7	15644.5	1783.98	3911.5	17803.8	12755.4	10189.2	16446.4		1.1016	7870.98	779.619	8650.6	7091.36
1.1664	3658.14	15899.9	13545	22468.5	9465.52	6667.08	4941.28	12130.7	9559.19	3220.17	9799.7	10168.1	5110.43	6880.2	3563.57	567.077	7224.6	6149.63	4408.69	15952.3	6698.97	13461.8	6619.19	2925.7	2823.32	4909.1	1987.78	2247.18	3967.83	8394.92	4786.38	3747.82	4305.67	6368.38	10377.7	11332.1	16453.1	2158.35	4271.02	18987.4	12995.3	10450.7	16735.2		1.1664	8101.97	794.25	8896.22	7307.72
1.2312	3536.45	16327.6	13657.3	21815.1	9253.53	6229.09	4994.61	12299.7	10235.1	3404.11	9933.39	10699.2	5249.09	7194.97	3690.58	541.657	7502.64	6424.96	4462.57	15859.3	7182.25	14067.4	6791.93	3117.16	2653.18	5126.9	2166.19	2367.12	4290.41	8715.26	4651.63	3427.23	4787.44	6720.44	10816.9	11654.6	17377.9	2674.1	4697.89	20119.7	13205.1	10709.5	16821.4		1.2312	8312.85	804.233	9117.08	7508.62
1.296	3521.09	16197.6	14115.7	21423.4	8682.61	5953.14	5150	12221.2	10798.5	3559.11	10400.9	11237.6	5434.02	7565.33	3704.09	511.583	7642.27	6865.96	4460.34	15629.7	7541.02	14473.9	6957.34	3325.01	2694.11	5316.47	2437.44	2526.1	4694.56	8884.41	4557.25	3210.28	5548.96	6924.71	11143.3	11944.6	18099.9	3172.28	5193.22	21048.7	13407.9	10978.6	16623.4		1.296	8506.46	807.649	9314.11	7698.81
1.3608	3708.06	15412.1	14902.8	21732.8	8255.56	5831.13	5471.12	11976.4	11520.2	3646.53	11106.3	11812	5571.09	7951.14	3685.39	525.334	7722.13	7406.9	4445.06	15399.3	7698.75	14572.4	7002.24	3575.85	2831.54	5459.27	2782.28	2708.52	5134.77	8994.54	4404.01	3242.13	6221.39	6998.15	11309.7	12227.9	18264.8	3550.33	5591.62	21634	13538.5	11247.9	16195.8		1.3608	8680.65	806.824	9487.47	7873.82
1.4256	4016.72	14448.9	15781.6	22639.6	8130.91	5926.85	5815.56	11756.4	12313.7	3647.24	11770.6	12424.3	5676.72	8288.41	3771.44	591.467	7908.94	7955.92	4453.37	15215.6	7835.58	14432.2	7096.03	3862.45	2950.79	5639.67	3109.99	2893.41	5454.73	9065.62	4296.07	3279.8	6655.66	7004.03	11383.4	12438.8	18064.2	3786.86	5707.52	21935.6	13665.6	11442.8	15855.9		1.4256	8846.31	808.692	9655	8037.61
1.4904	4518.59	14065.8	16220.1	23407	8120.89	6173.53	6228.49	11704.3	13051.1	3615.58	12451	12907.6	5788.13	8564.03	4036.39	695.871	8113.45	8370.6	4474.38	15075	8037.52	14088.1	7323.96	4139.02	3008.34	5854.56	3342.44	3037.64	5559.6	9057.27	4341.44	3283.08	6916	7028.07	11683.6	12509.5	17835.7	3941.36	5533.78	22005.9	13868.8	11543.9	15818.7		1.4904	9007.91	810.548	9818.46	8197.36
1.5552	5124.28	14336.3	16048.9	23538.3	8161.66	6366.81	6999.65	11870.7	13628.5	3587.28	13112.8	13322.4	5928.81	8715.37	4376.66	797.147	8218.72	8562.13	4602.83	15107	8281.12	13645.5	7560.79	4321.89	2962.65	6070.49	3493.93	3133.85	5579.61	9021.44	4427.69	3259.32	7244.76	7170.62	12118.1	12440.4	17808.2	4188.75	5358.33	22044.3	14197.1	11639.4	16044.1		1.5552	9172.52	809.063	9981.59	8363.46
1.62	5755	14971.1	15623.7	23144	8258.2	6434.26	8094.48	12168	14227.5	3633.7	13432.9	13669.6	6108.84	8825.18	4649.12	881.029	8255.35	8552.78	4885.47	15388.4	8380	13264.6	7649.3	4367.46	2863.59	6266.3	3629.39	3240.34	5659.74	9117.06	4441.1	3331.53	7730.55	7423.59	12363.3	12319.2	17912.9	4597.94	5422.4	22038.2	14576.3	11837.1	16463.5		1.62	9345.44	804.285	10149.7	8541.16
1.6848	6369.53	15491.1	15344.3	22515.3	8364.66	6397.95	9119.35	12417.3	14845.7	3728.07	13453.8	13959.8	6255.99	8963.5	4866.4	947.349	8311.86	8576	5165.86	15782.6	8347.27	13042	7718.19	4316.54	2721.51	6490.27	3893.29	3294.19	5732.69	9367.43	4384.78	3621.25	8305.58	7654.92	12263.5	12208.1	17963.4	5145.21	5670.94	22045.1	14843.5	12166.7	16928.2		1.6848	9511.65	797.719	10309.4	8713.93
1.7496	6796.44	15655.8	15299.1	22030.6	8531.61	6254.41	9878.65	12627.5	15309.8	3853.14	13173.8	14442	6336.45	9014.57	5149.28	986.749	8512.41	8809.67	5251.75	16054.1	8309.76	12953.9	7875.14	4307.79	2605.86	6744.28	4256.02	3296.24	5637.75	9639.38	4272.04	4014.13	8885.11	7828.98	12083.4	12126.7	18085.5	5727.16	5993.76	22041.9	14899.8	12588.5	17333.2		1.7496	9662.19	792.591	10454.8	8869.59
1.8144	6976.73	15435.9	15240	21536.3	8861.53	6133.82	10356.5	12793.3	15771.3	3880.16	12729.9	15325.5	6439.6	8929.87	5449.09	990.688	8910.43	9146.6	5190.6	16230.4	8303.67	13003.3	7960.64	4434.81	2602.16	6896.31	4568.89	3197.53	5435.08	9767.08	4185.21	4317.74	9389.36	7904.39	12083.6	12066	18438.5	6257.34	6358.1	22061.9	14681.6	12882.4	17577.8		1.8144	9783.76	789.843	10573.6	8993.92
1.8792	6988.47	14948.6	15171.4	21125.3	9142.72	6262.7	11090	13075.3	16161.5	3839.44	12395	16499.4	6502.12	8834.26	5668.1	990.823	9477.05	9385.81	5166.5	16432.3	8310.66	13187.3	7920.85	4766.15	2685.71	6903.43	4807.4	3047.06	5269.44	9782.03	4085.51	4426	9703.28	7860.14	12173.5	12240.1	18998.2	6673.99	6657.92	22100.8	14401.3	12802.9	17742		1.8792	9900.06	792.616	10692.7	9107.44
1.944	7085.82	14425.4	15196.5	20870.5	9228.79	6549.59	12163.5	13270.3	16389.9	3924.3	12257.8	17419.9	6462.54	8724.16	5841.95	1019.86	10133.4	9364.05	5313.65	16690.1	8404.89	13523.6	7825.27	5316.82	2785.62	6871.36	5051.55	2860.96	5199.02	9878.79	4000.27	4438.47	9785.37	7804.98	12303.9	12519	19384.1	6948.93	6772.49	22125.9	14213.5	12488.9	17852.6		1.944	10016	795.92	10811.9	9220.09
2.0088	7488.02	14163.2	15399.7	20614.3	9209.32	6865.83	13093.5	13246.4	16445.3	4200.79	12365.3	17895.2	6403.04	8696.06	6007.96	1080.12	10736.9	9154.46	5459.96	16869.6	8586.99	13967.5	7821.15	5928.84	2823.37	6957.49	5411.68	2778.11	5101.98	10000.6	3903.58	4415.56	9883.43	7794.93	12580.9	12679.9	19436.8	7012.86	6747.48	22225.2	14099.9	12193	17851.4		2.0088	10130.2	795.528	10925.7	9334.65
2.0736	8136.8	14123	15822	20371.6	9003.99	7152.4	13525	12935.9	16266.3	4458.64	12752.9	18130.2	6282.03	8773.1	6126.04	1168.26	11182	9135.58	5546.26	16918.6	8879.9	14398.8	7965.12	6543.45	2794.58	7118.57	5705.64	2792.32	4998.39	10015	3764.58	4350.84	9943.67	7838.3	13018.7	12707.6	19267.2	6816.2	6721.68	22407.8	14139.4	12023.4	17778.5		2.0736	10227.9	793.932	11021.8	9433.98
2.1384	8948.69	14135.3	16278	20128.6	8602.09	7172.34	13696.9	12539.5	16101.5	4649.5	13316.6	18327.8	6178.98	8879.9	6227.21	1287.05	11370.4	9429.4	5638.13	16659.8	9212.92	14678.3	8208.07	7186.6	2788.63	7213.37	5795.97	2869.19	4993.39	10043.5	3687.09	4330.18	9994.6	7860.16	13532.9	12643	19041.5	6503.56	6791.23	22660.5	14241.6	11992.8	17672.9		2.1384	10314.2	791.796	11106	9522.38
2.2032	9670.19	13942.7	16556	19760.2	8198.6	6892.23	14026.7	12390.8	16205.3	4863.11	13801.4	18624.1	6190.59	8918.34	6276.1	1454.15	11300.1	9867.61	5763.15	16332.1	9389.27	14842.6	8387.42	7846.66	2890.41	7212.82	5789.88	3117.14	4982.36	10286.3	3668.59	4318.45	10090.3	7793.34	14129.9	12635.4	18932.8	6324.57	7051.4	22846	14300	12045.5	17492.7		2.2032	10404.8	789.097	11193.9	9615.73
2.268	10103.4	13520.6	16634.7	19057.8	7994.81	6531.19	14716.6	12434	16607.5	5214.83	13816.4	18891	6312.39	8845	6271.69	1683.82	11142.4	10273	5915.17	16124.7	9413.02	15006.4	8386.97	8421.6	3048.52	7085.34	5782.56	3527.36	5043.69	10864	3612.15	4352.51	10179.7	7716.85	14573.8	12744	18903.5	6179.44	7459.2	22839.6	14331.2	12098.6	17402.6		2.268	10489.8	783.257	11273.1	9706.59
2.3328	10409.3	13038.3	16548.1	18048.2	8116.52	6242.6	15763.1	12514.4	17151.1	5753.21	13517.7	19260.7	6446.42	8595.53	6282.22	2015.45	10963.4	10591.6	6078.12	16127.9	9402.81	15207.1	8260.99	8893.18	3257.08	6859.69	5731.59	4011.14	5352.03	11719	3536.81	4402.02	10253.4	7690.21	14615.7	12880.8	18755.5	6078.57	7869.89	22610.6	14308.3	12072.4	17494.9		2.3328	10575.1	774.083	11349.1	9800.98
2.3976	10657.6	12599.6	16357.1	17158.2	8560.32	6044.5	17062.4	12633.9	17698.5	6324.38	13257.9	19753.8	6566.32	8169.73	6321.97	2459.6	10790.6	11001.8	6149.78	16247.3	9448.78	15411.8	8156.45	9298.37	3435.7	6616.06	5747.65	4478.63	5842.56	12550.8	3468.12	4388.36	10387.8	7702.51	14245.7	12977	18598.3	6153.17	8174.45	22368.9	14224.2	12031.5	17739.1		2.3976	10680.5	768.557	11449	9911.93
2.4624	11110.8	12248.5	16380.7	16689.7	9279.35	5899.49	18491.1	12715.5	18173.2	6895.72	13377.1	20123.7	6725.03	7735.97	6375.05	2991.78	10715	11504.3	6068.75	16237.7	9548.45	15532.3	8114	9646.25	3542.11	6447.78	5976.08	4881.78	6477.68	13155.7	3452.2	4442.94	10498.8	7804.33	13670.2	13034.8	18316.6	6419.06	8371.21	22200	14116.6	12159.3	18040.1		2.4624	10827.6	765.933	11593.5	10061.7
2.5272	11945.9	12039	16794.8	16429	9792.71	5870.49	19761.3	12823.3	18500.5	7447.9	13708.7	20418.9	6961.53	7471.38	6456.97	3519.75	10709.2	11856.7	5890.57	16127.3	9511.45	15567.6	8101.35	9839.33	3484.64	6359.31	6394.17	5114.99	7237.26	13422.9	3417.82	4454.24	10537.5	8056.65	13051.7	13037.3	18038.3	6728.52	8482.46	22136.8	13999.3	12480.8	18210		2.5272	10981.2	766.829	11748	10214.3
2.592	12962.5	11915.4	17459.7	16389.9	9976	5965.39	20969.3	12929.2	18516.3	7932.64	13850.5	20856.2	7191.43	7320.61	6614.32	4007.5	10704.6	11957.9	5781.74	15913.6	9281.27	15626.2	8144.95	9722.18	3406.78	6339.2	6884.46	5259.83	7804.98	13544.9	3272.75	4400.18	10672.2	8360.27	12686.2	12972.1	17973.2	7069.43	8560.55	22122.6	13861.8	12919.2	18132.2		2.592	11121.7	772.487	11894.2	10349.2
2.6568	14019	11916.7	18141	16191	9853.59	6162.05	21986.5	12881.4	18327.9	8403.51	13816	21489.8	7367.08	7296.24	6743.53	4402.1	10570	11917.9	5792.64	15739.3	9019.23	15687.9	8124.68	9383	3371.26	6366.77	7268.38	5458.4	7912.02	13518.1	3141.18	4310.6	10904.6	8565.5	12538.4	12927.6	18042.3	7555.08	8602.87	22109.8	13693.6	13275.1	17959.8		2.6568	11226.8	780.158	12007	10446.7
2.7216	14967	11996.2	18700.4	15830.6	9604.47	6381.74	22765	12625.5	18152.4	8909.84	13744.3	22114.2	7489.89	7417.85	6766.07	4649.01	10418.5	11836.4	5905.21	15724.5	8977.27	15620.7	7964.39	8975.59	3307.63	6439.8	7579.07	5764.75	7795.77	13250.6	3027.1	4185.85	11394.8	8568.06	12497	12871.7	18293.5	8251.32	8602.73	22030.7	13575.3	13425	17865.4		2.7216	11308.4	788.101	12096.5	10520.3
2.7864	15703.6	12196.5	18834.9	15691.7	9313.81	6565.27	23345.2	12356.8	18122.2	9438.74	13789.9	22584.5	7704.46	7507.03	6774.42	4693.56	10134.3	11760.9	6027.24	15826	9206.79	15430.2	7743.94	8786.2	3349.71	6525.56	7693.46	6047.48	7813.83	12873.9	2880.86	4029.57	11841.9	8443.82	12446.7	12829	18548	8903.87	8709.94	21907.1	13589	13370.6	17924.5		2.7864	11378.3	795.122	12173.4	10583.2
2.8512	16341.1	12525	18596.9	15835.3	9130.52	6651.64	24058.8	12162.4	18060	9935	13862.5	22862.3	8051.06	7578.22	6960.01	4647.05	9804.72	11805.5	6109.5	15955.5	9569.28	15313.5	7516.81	8915.71	3470.29	6625.03	7820.11	6139.6	8161.21	12510.3	2766.74	3899.5	12190	8299.08	12316.4	12841.7	18488	9265.53	8875.34	21815.9	13672.2	13162.5	18073.4		2.8512	11456.8	800.156	12256.9	10656.6
2.916	17027.5	13002.7	18207.2	15892.7	9245.1	6639.9	24996.1	12152.5	17704.6	10541.2	13898.1	22925.1	8514.89	7577.71	7255.29	4684.41	9548.09	12059.2	6172.12	16002	9813.03	15418.2	7288.61	9204.41	3571.33	6677.52	8029.14	6056.41	8733.18	12203.1	2738.63	3833.45	12399.7	8196.63	12150	12989.1	18134.8	9472.41	8973.83	21859.3	13770.9	12975.2	18209.8		2.916	11552.2	803.759	12356	10748.4
2.9808	17627.6	13387.9	17863.6	15511.8	9565.63	6516.84	25964	12404.2	17266.5	11206.6	13901.8	22928.8	8907.75	7546.89	7398.15	4977.27	9465.85	12510.7	6209.83	15952.1	9741.78	15553.7	7095.46	9546.87	3639.59	6604.33	8389.43	6008.6	9131.88	12024.1	2794.89	3805.36	12454.3	8190.78	11866.6	13239.3	17857.7	9612.63	8940.93	22040.5	13940.2	12872.1	18268.1		2.9808	11645	808.077	12453	10836.9
3.0456	18123.1	13515.9	17727.6	14708.9	9766.53	6272.76	26641.6	13021.9	16841.9	11822.3	13809.5	23029	8998.99	7579.32	7380.43	5560.29	9588.89	13039.2	6178.7	15897.1	9271.45	15592.5	6981.81	9758.98	3736.37	6429.36	9028.9	6077.95	9240.43	11962.4	2825.57	3737.68	12573.1	8273.98	11626.7	13368.8	17745.6	9622.57	8787.21	22263.1	14179.8	12851.3	18107.1		3.0456	11710.4	812.553	12522.9	10897.8
3.1104	18399.3	13514.6	17950	13928	9847.66	5946.45	26935.7	13511.3	16509.8	12395	13922.3	23163.9	8764.89	7686.96	7259.1	6382.92	9935.06	13451.6	6124.86	15857.2	8605.2	15603.1	6965.24	9794.98	3815.52	6258.34	9945.99	6297.08	9217.43	12033.5	2814.11	3618.41	12643.2	8381.62	11559.6	13351.6	17918.7	9620.22	8559.91	22411.6	14408.9	12797.2	17791.5		3.1104	11765.1	816.679	12581.8	10948.4
3.1752	18662.4	13475.5	18471.9	13507.2	9966.3	5656.44	26860.8	13407.3	16316	12838.7	14253.4	23126.2	8216.75	7797.64	7161.09	7449.25	10222	13737.7	6053.24	15841.2	8074.17	15546.9	6958.48	9719.82	3868.08	6179.8	10867.2	6550.06	9363.46	12258.2	2790.07	3682.39	12674.7	8388.09	11772.5	13196.3	17966.1	9777.26	8363.27	22415.9	14553.5	12657.5	17400.9		3.1752	11815	815.488	12630.5	10999.5
3.24	18795.1	13660.5	18981.3	13361	10104.9	5352.67	26776.4	12719.2	16210.7	13115.1	14533.5	22922	7611.53	7776.62	7111.5	8685	10221.4	13959.9	5960.32	15687.4	7912.38	15365.5	6820.17	9545.65	3923.72	6236.92	11557.4	6822.59	9874.98	12457.2	2741.97	3886.91	12690.1	8231.48	12071.4	12940.3	17836.7	10158.2	8340.35	22247.9	14585.6	12471.2	17043.7		3.24	11844.4	810.109	12654.5	11034.3
3.3048	18830.9	14093.9	19155	13279.1	10159.4	4934.29	26570.9	11799.5	16062.7	13245.9	14521.4	22638.1	7207.53	7639.1	7194.27	9854.62	9921.78	14346.1	5878.76	15340.8	8109.77	15200.8	6676.11	9419.77	3992.43	6351.69	12008.7	7065.54	10445	12580.2	2642.66	4011.45	12776.3	7990.84	12247.3	12713.7	17514	10803.1	8490.66	22061	14537.3	12354	16762.8		3.3048	11847.2	801.789	12649	11045.4
3.3696	18938	14595.1	18868.1	13297.2	10026.9	4652.11	26305.6	10975.5	15750.6	13440.8	14221.7	22491.5	7131.65	7465.6	7325.62	10706.6	9688.54	14721.3	5851.72	14824.7	8458.27	15167.1	6680.31	9311.65	4099.59	6402.14	12365.4	7358.7	10809.2	12588.9	2486.35	4089.92	12736.8	7752.64	11955.6	12657.2	17000.1	11473.4	8776.35	21975.1	14326.8	12297.8	16630.6		3.3696	11829.7	792.067	12621.8	11037.7
3.4344	18920.7	14840.7	18416.1	13233.7	9696.88	4595.45	26112.4	10389.5	15313.3	13774.5	13971.7	22513.5	7275.15	7179.19	7348.43	11105.7	9705.72	14942.2	5878.14	14310.6	8850.34	15231.7	6748.9	9265.24	4234.85	6385.19	12894.9	7649.43	10922.9	12593.6	2332.91	4058.27	12510.7	7560.4	11452.2	12660.4	16432.8	11770.4	9199.11	21962	14056.3	12198.7	16616.8		3.4344	11793.3	784.002	12577.3	11009.3
3.4992	18872.3	14925.7	17949.7	12929.3	9300.61	4628.54	25996.2	9971.91	14930.1	14169.3	14064.4	22568.8	7576.83	6876.04	7307.83	11023.1	10009.5	14913.2	5862.42	13912.2	9174.44	15294.6	6776.29	9326.14	4408.02	6374.9	13765.3	7938.9	10891.1	12682.8	2180.08	3927.19	12313.7	7489.14	11091.1	12672.1	15798.3	11792.4	9655.79	21936.5	13822.1	12069.5	16586.1		3.4992	11761.7	778.056	12539.8	10983.7
3.564	18433.6	15364.7	17678	12591.6	8896.86	4686.39	25851.2	9758.08	14668.8	14658	14414.7	22504.2	7980.59	6604.66	7242.51	10636.1	10401.2	14824.8	5865.51	13633.1	9298.98	15262.3	6846.19	9289.41	4590.27	6420.06	14836.7	8101.39	10824.3	12823.5	2031.78	3819.07	12293	7504.74	10994.2	12690.6	15131	11687.1	9965.34	21940	13658.5	11894	16593.3		3.564	11748.6	773.85	12522.5	10974.8
3.6288	17855.6	16226.4	17642.2	12425.4	8653.81	4748	25635.7	9746.3	14574	14986.8	14893.6	22264.7	8305.73	6474.16	7148.69	10322.1	10679.2	14951.7	5947.73	13544.8	9197.65	15138.3	6889.5	9064.64	4736.35	6538.83	15879.8	8137.62	10783.7	12897.2	1898.64	3729.35	12447	7561.89	11024.3	12689.3	14705.2	11562	10060.3	22071.5	13566	11666.2	16656.9		3.6288	11765.8	773.987	12539.8	10991.8
3.6936	17334.7	17077.6	17711.8	12558	8671.98	4881.58	25500.8	9848.36	14714	15162.6	15366	22066.3	8348.65	6462.07	7063.94	10258.5	10752.9	15109	6119.19	13587.5	8834.79	15044	6774.63	8664.89	4717.51	6607.21	16702.9	8118.23	10714.9	12990.6	1865.23	3608.63	12625.2	7655.7	11159.1	12678.4	14287.2	11574.5	9925.74	22229.3	13500.8	11535.5	16757.1		3.6936	11794.6	779.166	12573.8	11015.4
3.7584	16834.7	17286.1	17560.1	12970.8	8933.75	5188.11	25491.7	9922.65	14975.9	15322.9	15640.4	22172	8062.03	6451.98	6966.14	10538.7	10798.4	15136	6200.76	13683.2	8360.61	14967.6	6532.21	8190.58	4506.51	6596.15	17197.7	8173.79	10611	12999.7	1902.15	3488.68	12678.8	7767.08	11423.8	12589.3	13654.6	11694.2	9702.43	22297.4	13460.6	11505.1	16811.2		3.7584	11796.5	784.4	12580.9	11012.1
3.8232	16385.1	16977.1	17413.3	13339.2	9302.8	5500.11	25483.7	9925.32	15077.6	15435.5	15636.7	22449.9	7679.11	6379.03	6806.17	11107	10939.8	14984	6033.85	13779.5	7978.73	14788.7	6197.37	7756.28	4172.9	6513.81	17349.1	8296.4	10379.7	12856.9	1961.13	3395.26	12538.9	7925.12	11590.1	12394.3	13085	11786.1	9591.95	22247.1	13353.5	11493.1	16731.2		3.8232	11744.6	787.384	12532	10957.2
3.888	15917.9	16497.7	17434.2	13398.6	9473.7	5728.23	25196.5	9784.2	14923.7	15650.6	15441.6	22791.5	7396.34	6244.14	6605.61	11710	11035.9	14716.6	5652	13846.2	7716.65	14464	5781.03	7437.66	3877.91	6372.78	17363.7	8563.72	10074.8	12511.5	2036.23	3343.41	12273.1	8130.82	11540.4	12177.5	12697.9	11874.9	9747.9	22079.2	13233.6	11454.6	16493.7		3.888	11644	786.393	12430.4	10857.6
3.9528	15410.5	16150.1	17594.4	13111.5	9293.81	5732.15	24807.4	9487.61	14551.4	16083.3	15294.3	23090.8	7286.72	6070.5	6372.12	12273	10886.2	14543.5	5318.11	13752	7587.43	14091.3	5404.27	7349.79	3798.12	6237.79	17304	8938.66	9753.63	12024.2	2036.58	3295.85	11861.3	8259.75	11275.8	11920.8	12556	11974.7	10156.3	21856.5	13127.9	11352	16151.8		3.9528	11521.5	784.484	12306	10737
4.0176	14857.3	15948.6	17517.3	12665.7	8925.66	5555.87	24493.3	9159.88	14099.1	16440.4	15345.3	23271.2	7273.81	5804.57	6151.12	12683.5	10468.5	14576.8	5193.52	13502.7	7611.62	13782.3	5208.49	7471.02	3890.32	6161.93	17375.2	9333.97	9407.51	11548.4	1988.6	3216.38	11424.5	8243.64	10894.3	11579.5	12769.8	11836.8	10519.1	21685.1	13062.1	11151.8	15853.5		4.0176	11394.2	783.159	12177.3	10611
4.0824	14182.5	15705.4	17141.3	12132	8661.9	5328.72	24099.9	8853.67	13768.9	16616.7	15369	23305.1	7297.21	5481.57	5992.66	12867.8	10055.5	14815.9	5275.09	13146.4	7605.42	13554.8	5191.19	7598.89	4060.55	6112.24	17547.9	9633.72	9039.22	11287.4	1930.94	3165.72	11050.8	8126.62	10575.2	11283.1	12940.2	11496.1	10582.7	21621.2	13000.9	10802.4	15703.9		4.0824	11256	779.355	12035.4	10476.6
4.1472	13678.1	15456.5	16742.9	11719.2	8575.56	5016.72	23574.6	8691.43	13496.4	16676.6	15323.3	23149.9	7352.86	5193.89	5771.68	12827.1	9864.13	15305.5	5477.99	12905.2	7527.38	13412.9	5186.53	7678.41	4223.31	6021.46	17609.9	9876.34	8769.92	11152.3	1855.91	3147.93	10893.7	7990.04	10534.7	11144.2	12728.6	11149.7	10394.2	21617.4	12979	10442.4	15602.4		4.1472	11133.4	773.58	11907	10359.9
4.212	13269.9	15384.1	16457.6	11287.2	8591.5	4728.39	23017.8	8585.9	13157.3	16489.3	15179.8	22748.7	7442.81	5034.92	5510.75	12800.4	9969.79	15769.5	5724.04	12788.2	7490.72	13302.9	5111.96	7616.2	4286.32	5826.07	17520.6	9986.88	8693.91	10930.6	1764.95	3113.23	10970.3	7943.25	10741.9	11129.2	12156.7	10999.5	10123.4	21500.9	13026.7	10213.1	15420.9		4.212	11018.8	764.076	11782.9	10254.7
4.2768	12868.4	15670.4	16201.9	10766.4	8488.21	4471.42	22466.7	8302.28	12666.6	16175.1	15147.8	22097.4	7418.77	4919.45	5286.72	12912.2	10187.6	16075.9	5873.13	12722.4	7465.19	13257.9	4997.57	7309.87	4258.17	5587.69	17413.8	9912	8736.48	10587.5	1718.81	3091.14	11085.5	8027.68	10961.9	11141.8	11566.7	11138.1	9774.37	21264.7	13041.9	10145.2	15224.7		4.2768	10893.7	754.617	11648.3	10139
4.3416	12510.4	16276.6	15726.6	10446.4	8250.08	4193.78	21978.7	7831.72	12061.1	15791	15453.1	21260.3	7166.8	4755.48	5180.51	13117.9	10352.2	16132.6	5881.26	12617.9	7341.5	13287.8	4850.55	6962.66	4295.48	5404.2	17590.8	9640.47	8779.36	10263.3	1759.29	3139.81	11035.5	8209.61	11083	11139.8	11295.3	11287.1	9288.1	20982.6	13016.4	10160.7	15094.3		4.3416	10764.9	748.083	11513	10016.9
4.4064	12182.7	16900.4	15187.5	10268.5	8046.68	4020.79	21399.2	7362.99	11415.1	15345.7	16008.1	20269	6895.99	4688.47	5197.47	13193.1	10416.4	16072.4	5798.33	12449.5	7104.73	13272.8	4723.58	6708.6	4485.38	5358.03	17989.1	9339.35	8742.84	10061.1	1828.6	3251.07	10834.2	8339.42	10998.3	11109.4	11280.8	11330.2	8766.53	20865.7	12884.6	10217.2	15014.7		4.4064	10642.4	741.171	11383.6	9901.26
4.4712	11909	17464.5	14641.5	9898.09	8041.03	3881.67	20832.1	7048.5	10805.8	14869.7	16643.3	19249.9	6773.15	4785.7	5315.62	13060.7	10403.5	16101.9	5756.8	12224.5	6853.06	13081.3	4646.09	6647.11	4504.42	5387.91	18664.5	9094.25	8687.32	10045.4	1853.85	3234.68	10577.4	8247.92	10838.8	11044.1	11457	11343.6	8416.51	20959.4	12665	10304.1	14955.9		4.4712	10539.9	737.78	11277.7	9802.14
4.536	11704.3	18054.5	14120.1	9306.45	8195.01	3752.95	20383.8	6912.62	10296.8	14167.1	17083.6	18394.7	6750.69	4852.38	5427.62	12890.1	10502.5	16128.6	5800.14	12000.3	6719.97	12718.4	4533.67	6698.05	4325.51	5332.98	19614.8	9010.52	8628.06	10075.4	1841.76	3067.1	10317.7	7954.17	10551.2	10961.8	11672.3	11359.3	8308.64	21179.4	12487.2	10369.4	14922.5		4.536	10450.6	740.916	11191.5	9709.64
4.6008	11585.5	18797.1	13552.6	8688	8409.67	3600.16	20085.6	6959.73	10004.3	13556.9	17340.9	17785.2	6749.92	4794.25	5472.27	12803	10810.4	16131.5	5827.88	11800.3	6783.73	12275.1	4369.74	6766.66	4031.02	5119.89	20696.1	9150.67	8487.97	10220.7	1863.56	2938.7	10140.4	7695.97	10321.8	10897.1	11739.1	11431	8367.5	21414.6	12382.9	10353	14961.2		4.6008	10399.2	751.241	11150.4	9647.91
4.6656	11624.8	19553.9	12919	8309.8	8428.47	3463.08	19894.9	7003.46	10029.8	13287.2	17382.1	17373.5	6709.27	4697.49	5454.26	12825	11366.6	16152	5818.92	11741.7	7022.61	11812	4186.23	6843.55	3806.26	4803.63	21717.8	9453.9	8346.76	10511.6	1921.44	2946.45	9996.83	7577.88	10270	10850.8	11465	11443.9	8491.9	21573	12339.3	10193.1	15047.9		4.6656	10387.4	763.73	11151.1	9623.64
4.7304	11696.3	19997.8	12447.7	8193.39	8084.51	3443.44	19623.5	6867.98	10249.6	13214	17312.9	17022.7	6624.82	4544.67	5346.93	12874.2	11966.2	16142.9	5769.51	11671.9	7309	11413	3987.4	6895.4	3683.15	4539.27	22301.1	9792.53	8233.58	10785.2	1918.67	3012.26	9789.89	7538.44	10358.8	10767	10923.6	11408.3	8556.67	21633.5	12251.4	9791.08	15154.6		4.7304	10352.1	771.563	11123.6	9580.5
4.7952	11686.3	20227.9	12099.1	8266.4	7497.53	3501.18	19117.2	6636.99	10357.1	13168.1	17420.1	16672.1	6521.1	4421.24	5208.08	12848.3	12230	15963	5690.88	11575.4	7411.78	11215.2	3845.61	7010.69	3660.32	4367.23	22338.8	10011.1	7986.37	10808.2	1801.28	2984.68	9472.61	7532.09	10497.7	10665.2	10451.4	11300.5	8506.31	21522.7	12089.2	9267.89	15194		4.7952	10256.9	772.13	11029.1	9484.82
4.86	11594.8	20609.4	11837	8348.51	6954.08	3618.52	18417.2	6368.15	10263.8	13017.6	17408.1	16361.1	6473.26	4381.15	5016.32	12678	12097.6	15625.9	5647.76	11574.6	7284.44	11143.2	3767.17	7203.11	3682.51	4321.37	21935.6	10077.1	7585.13	10642.5	1673.33	2878.34	9191.17	7536.34	10677.7	10554	10415.2	11134	8315.4	21252.9	11932.2	8894.08	15071		4.86	10127	765.362	10892.4	9361.63
4.9248	11351.1	21207.7	11636.3	8332.29	6834.96	3818.01	17692.9	6095.91	10056	12805.4	17078.2	16031.6	6522.13	4402.5	4865.34	12395.6	11695.7	15426.4	5679.81	11743.5	7110.02	11061.6	3722.8	7325.4	3721.36	4341.31	21435	10081.9	7244.64	10305.7	1640.3	2839.8	9053.77	7496.31	10755.6	10443.3	10666.2	10897.8	8079.51	20930.5	11835.7	8825.16	14848.4		4.9248	10007.8	754.149	10761.9	9253.61
4.9896	11005.6	21650.9	11518.8	8243.64	7033.41	3982.45	17110.7	5944.31	9874.32	12631.6	16514.3	15608.5	6612.12	4398.93	4806.31	12132.1	11154.8	15401.1	5723.12	11870.6	7053.77	10948.6	3732.85	7219.5	3773.93	4332.33	20947.8	10094.1	7025.93	9908.88	1664.2	2736.79	9030.81	7427.28	10660.7	10318.3	10857.4	10623.2	7879.81	20692.2	11774.2	9060.9	14640.8		4.9896	9898.18	741.603	10639.8	9156.57
5.0544	10673.5	21624	11483.8	8164.82	7235.41	3897.57	16822.2	5871.56	9888.4	12493	15879.5	15172.6	6618	4387.03	4762.97	11941.1	10540.5	15491.3	5653.94	11732.6	7045.09	10806.5	3767.23	6985.16	3774.85	4236.41	20523.7	10208.5	6926.19	9568.16	1674.63	2477.05	9185.03	7307.36	10448.7	10230.8	10743.6	10462	7747.3	20580.4	11641.1	9281.59	14606.7		5.0544	9780.51	731.953	10512.5	9048.56
5.1192	10469.1	21019.5	11449.4	8032.59	7287.21	3719.15	16682.1	5824.92	10014.6	12482.7	15274	14906.1	6586.06	4383.65	4657.15	11874.8	10076.9	15575.2	5499.12	11411.5	6996.91	10572.9	3764.54	6715.89	3721.17	4071.4	20159.6	10407.4	6827.06	9308.88	1660.56	2209.45	9465.01	7203.79	10189.4	10193.4	10385.6	10380.3	7737.47	20527.4	11510	9295.65	14695		5.1192	9656.38	723.39	10379.8	8932.99
5.184	10276.8	20223	11358.7	8017.55	7356.45	3620.98	16578.8	5740.02	10003.6	12579.9	14941.1	14857.7	6544.13	4276.52	4470.38	11808.1	9890.88	15657.6	5367.71	11061.9	6826.74	10233.9	3732.53	6518.26	3704.68	3920.69	20016.8	10541.3	6537.62	9090.55	1634.49	2054.96	9771.32	7137.76	9899.47	10177.5	10158.1	10326.8	7876.37	20474.4	11506.5	9092.14	14775.5		5.184	9549.77	718.288	10268.1	8831.48
5.2488	9975.64	19728.1	11271.4	8183.16	7460.8	3554.01	16240.8	5620.82	9773.82	12787.5	14735.7	14786.6	6539.24	4063.93	4373.19	11670.6	9823.63	15767.8	5296.41	10637	6436.58	9917.68	3715.28	6376.46	3743.01	3782.57	20097.3	10500.7	6056.85	9004.68	1582.79	2069.73	9881.05	7147.76	9581.52	10192.1	10461.4	10142.2	7962.37	20439.4	11614.5	8789.05	14835.1		5.2488	9456.28	716.99	10173.3	8739.29
5.3136	9634.93	19698.6	11170	8326.73	7530.13	3592.82	15751.9	5508.36	9450.17	12875.3	14667.9	14591.4	6589.19	3801.97	4359.53	11500.6	9739.74	15861	5261.27	10204.4	5862.82	9753.11	3672.21	6307.91	3758.54	3646.69	20084.6	10305.8	5545.5	9116.79	1500.81	2119.23	9716.96	7272.93	9330.61	10192.1	11176.2	9837.23	7811.44	20491.2	11783	8477.68	14826.4		5.3136	9365.25	719.107	10084.4	8646.14
5.3784	9302.54	20333.5	11100.7	8338.38	7465.98	3662.58	15315	5397.9	9115.75	12820.2	14737.4	14338.3	6635.64	3532.31	4306.19	11310	9640.99	15798.7	5274.25	9838.5	5436.7	9722.79	3694.23	6352.84	3726.35	3481.39	19826.3	10188.8	5147.07	9396.96	1357.83	2120.61	9449.24	7426.95	9053.82	10162.9	11893.1	9570.17	7587.52	20640.7	12015.3	8259.64	14769.8		5.3784	9291.76	726.296	10018.1	8565.47
5.4432	8953.48	21181.5	10942.7	8194.78	7213.9	3745.59	15151.1	5412.49	8899.2	12583.6	14926.3	14088.3	6610.73	3352.17	4216.51	11111.9	9653.15	15558.7	5312.7	9605.06	5336.35	9689.61	3750.09	6444.26	3678.93	3309.6	19317.8	10251.7	4850.54	9728.58	1246.01	2102.2	9110.3	7416.59	8789.97	10047.9	12389	9474.46	7445.92	20797.4	12232.1	8111.23	14708.7		5.4432	9231.24	733.32	9964.56	8497.92
5.508	8542.82	21856.5	10611.1	8003.4	7005.28	3793.69	15214.4	5478.66	8916.84	12117.4	15232	13860.2	6666.46	3265.32	4090.69	10822.8	9754.62	15146.8	5294.85	9423.35	5324.79	9579.68	3740.47	6476.03	3644.19	3184.04	18834.5	10407.6	4530.76	10002.5	1222.03	2030.92	8837.32	7181.66	8611.02	9859.46	12628.2	9475.43	7406.03	20937.4	12425.6	7911	14633.5		5.508	9162.36	739.152	9901.51	8423.21
5.5728	8021.4	22211	10180.4	7732.07	7026.95	3854.83	15254.7	5571.27	9091.55	11558.7	15613.8	13710.6	6851.84	3234.62	3993.83	10441.9	9824.04	14646.9	5166.07	9332.11	5363.68	9411.4	3641.65	6363.26	3651.84	3125.57	18363.5	10492.8	4188.93	10137.6	1299.08	1939.56	8638.62	6866.45	8628.21	9670.02	12681.8	9449.9	7429.56	21072.4	12591	7709.34	14572.6		5.5728	9083.89	741.434	9825.32	8342.45
5.6376	7462.91	22509.3	9802.46	7350.72	7085.94	3935.36	15166.9	5608.82	9318.73	11080	16008.4	13726.3	7012.47	3207.68	3908.95	10032.1	9794.53	14287	4919.91	9442.14	5613.88	9158.3	3441.66	6099.69	3705.89	3090.28	18096.8	10444.5	3923.67	10156.7	1382.13	1922.5	8516.62	6602.74	8686.77	9507.18	12710.6	9291.63	7580.95	21160.8	12656.4	7534.2	14586.3		5.6376	9012.35	745.416	9757.76	8266.93
5.7024	7047.1	23020.1	9543.44	7022.19	7097.63	4030.35	15040.2	5654.4	9543.96	10663.9	16256.9	13932.8	7131.88	3139.98	3778.91	9744.6	9727.39	14095.1	4709.48	9605.97	6064.57	8903.69	3214.97	5829.69	3873.78	3028.22	18108.6	10472.3	3863.61	10097.8	1399.98	1995.4	8446.44	6463.82	8654.74	9429.93	12659.6	9148.77	7839.38	21142.3	12693	7342.06	14591.1		5.7024	8977.91	752.273	9730.18	8225.63
5.7672	6919.83	23325.7	9431.63	6724.01	7239.19	4160.47	14933.5	5655.8	9692.51	10327.6	16450.7	14071.1	7145.04	3062.82	3623.55	9549.6	9699.56	14073.6	4677.48	9752.16	6539.14	8719.01	2983.7	5646.61	4110.53	2992.35	18371	10601.6	4119.14	10081.4	1404.49	2084.83	8360.15	6467.22	8509.79	9384.43	12630	9164.4	8119.82	20956.8	12569.3	7162.43	14505.7		5.7672	8976.74	755.088	9731.83	8221.65
5.832	6995.44	23272.3	9270.47	6610.35	7416.89	4208.6	14630.4	5556.81	9756.01	10088.8	16680.1	14033.8	6969.04	2967.34	3474.8	9389.34	9660.05	13904	4723.17	9730.32	6835.41	8556.67	2764.9	5557.77	4330.24	3011.39	18625	10801.9	4405.82	10114.9	1368.32	2177.82	8248.98	6539.04	8332.6	9354	12621.5	9341.57	8383.83	20755.5	12259.4	6978.88	14358.8		5.832	8954.94	752.162	9707.1	8202.78
5.8968	7063.45	23115.1	8916.13	6605.61	7563.51	4164.85	14193.9	5443.5	9763.23	9844.91	16932.2	13853.1	6695.13	2839.08	3340.09	9140.27	9486.4	13587.4	4680.55	9758.45	6852.49	8480.8	2651.11	5394.78	4430.5	3039.55	18974.3	10973.6	4354.02	10232.7	1304.81	2212.03	8095.29	6676.38	8205.34	9319.38	12574.8	9630.36	8503.81	20657.5	11823.4	6806.24	14247.1		5.8968	8893.66	751.475	9645.13	8142.18
5.9616	7056.4	23133.4	8343.22	6748.98	7751.85	4104.52	13602.9	5452.31	9668.17	9632.19	17118	13681.5	6405.97	2734.76	3241.84	8846.76	9295.08	13195.5	4527.61	9904.69	6610.21	8628.13	2606.61	5118.94	4391.3	3050.55	19450.7	11196.8	3949.05	10424.8	1283.91	2176.68	8032.78	6866.5	8124.65	9297.82	12520.3	9992.63	8393.47	20733.4	11426.6	6734.13	14264.6		5.9616	8830.7	757.405	9588.11	8073.3
6.0264	6902.15	23508.7	7670.1	7016.95	8042.13	3953.75	13023.3	5550.65	9465.08	9379.62	17358.9	13609.1	6183.8	2714.63	3228.97	8571.58	9098.8	13041	4308.8	10122.7	6388.28	8916.26	2566.02	4804.9	4191.55	3060.59	19850.1	11348.5	3368.21	10688.5	1269.79	2148.24	7980.65	7009.07	8038.33	9252.72	12447.1	10476	8067.18	20892.3	11144.2	6666.1	14391.2		6.0264	8784.11	771.613	9555.72	8012.49
6.0912	6698.15	24132.2	7154.7	7253.4	8255.05	3868.64	12745.3	5729.93	9092.41	9077.07	17539.1	13507	6168.18	2738.9	3230.44	8249.92	8908.68	13161.8	4059.62	10342.4	6353.88	9176.67	2521.58	4649.52	3858.77	3069.49	19937.3	11339	2915.79	10867	1238.26	2123.54	7856.36	7067.78	7885.21	9194.62	12423.7	11033	7653.61	21009.2	10964.5	6470.99	14516.6		6.0912	8745.1	787.135	9532.23	7957.96
6.156	6551.06	24915.8	7001.26	7547.14	8249.06	3912.8	12732.2	5884.02	8721.48	8732.98	17444.8	13273.7	6357.1	2765.05	3214.78	7912.55	8710.97	13598.4	3822.56	10512.3	6508.13	9343.76	2465.61	4732.12	3502.2	3048.93	19791.8	11200.3	2706.35	11009.6	1233.87	2076.41	7567.17	7023.09	7597.5	9134.88	12461.8	11421.3	7250.77	21128.9	10899.3	6180.66	14490.1		6.156	8712.43	800.141	9512.57	7912.29
6.2208	6475.87	25390.3	7234.87	7896.59	8079.66	3954.01	12790.3	5919.94	8419.52	8369.5	17194.5	12816.7	6564.47	2809.33	3103.58	7603.39	8584.22	14017.7	3688.48	10625	6766.82	9405.38	2396.66	4955.74	3193.29	3007.09	19538.7	11059.7	2719.49	11117.7	1252.93	1989.24	7080.29	6932.74	7313.77	9090.76	12396.6	11537.3	7015.96	21358.9	10921.9	5958.54	14277.6		6.2208	8670.35	806.217	9476.57	7864.13
6.2856	6467.15	24894.4	7651.1	8116.47	7962.68	3847.03	12877.9	5834.17	8145.51	8046.8	16912.1	12183.5	6683.64	2851.73	2914.8	7327.64	8454.05	14148.4	3682.6	10660.2	6876.49	9352.56	2389.13	5228.6	2966.83	2982.22	19144	10901.5	2901.38	11244.8	1300.94	1905.85	6582.07	6896.24	7021.4	9049.04	12207	11460.8	7050.04	21676.3	10978	5861.15	14086.3		6.2856	8598.24	798.247	9396.49	7800
6.3504	6416.55	23698.9	7907.45	8176.52	7830.89	3702.49	13010.4	5715.07	8007.26	7802.52	16578.5	11666.2	6730.16	2838.24	2757.31	7081.74	8339.56	13944	3747.81	10617.5	6670.9	9226.93	2440.21	5386.51	2790	2957.19	18634	10838.7	3110.68	11259.8	1355.17	1863.41	6262.12	6880.25	6750.9	8967.51	11993.8	11321.3	7285.45	21869.1	10972.7	5860.25	13943.4		6.3504	8493.24	779.663	9272.9	7713.57
6.4152	6322.73	22338.7	7805.4	8121.15	7684.44	3638.9	13209.8	5539.42	7920.71	7674.33	16398.4	11470.1	6733.09	2806.05	2660.91	6884.94	8249.39	13750.8	3742.99	10651.9	6316.7	8978.2	2447.16	5474.98	2666.29	2903.44	18303.7	10977.5	3310.87	11137	1365.79	1866.05	6156.66	6804.26	6585.59	8870.05	11939.7	11168.6	7625.62	21739.4	10874.5	5848.3	13832.2		6.4152	8390.62	761.188	9151.81	7629.43
6.48	6240.24	21538.3	7416.52	7976.53	7662.43	3542.39	13304.3	5238.68	7899.37	7577.14	16398	11550.9	6672.6	2762.66	2618.11	6656.47	8214.74	13855.3	3589.54	10695.5	5967.18	8544.75	2386.04	5475.7	2609.84	2802.5	18395.2	11221.5	3527.49	10846.1	1334.27	1898.81	6151.34	6687.24	6454.49	8796.86	11771.6	11016.4	7973.76	21340.8	10797	5724.86	13770.2		6.48	8300.09	753.462	9053.55	7546.62
6.5448	6117.72	21386.6	6843.3	7759.67	7655.58	3438.39	13014.6	4909.13	7992.82	7445.86	16767.7	11714.6	6504.92	2687.7	2580.79	6364.5	8173.95	14099	3360.34	10713.5	5713.84	8059.94	2290.03	5362.6	2562.94	2668.18	18834.6	11289.8	3739.31	10395.1	1325.57	1957.3	6153.64	6582.11	6334.8	8753.13	11485.4	10996.6	8232.91	20895	10819.3	5555.35	13862.7		6.5448	8218.62	758.038	8976.66	7460.59
6.6096	5978.36	21206.1	6403.08	7554.55	7582.83	3470.97	12425.7	4624.89	8172.77	7303.21	17128.4	11902.4	6307.94	2614.7	2519.06	6118.15	8093.59	14113.7	3195.93	10598.3	5648.85	7676.96	2164.31	5178.85	2459.55	2532.51	19296.5	11088.1	3831.05	9947.13	1392.55	1974.12	6097.78	6483.65	6241.74	8690.77	11173.7	11188.9	8312.48	20573.9	10925.2	5441.13	14077.9		6.6096	8132.84	762.629	8895.47	7370.21
6.6744	5861.38	20820.5	6261.94	7387.41	7537.76	3577.62	11947.6	4451.17	8511.34	7197.24	17154.2	12007.8	6236	2554.67	2428.89	6009.16	8094.05	13805.8	3096.52	10401.2	5798.93	7435	2094.81	5025.95	2348.08	2347.93	19434.3	10703.7	3836.86	9575.93	1490.08	1951.58	5944.38	6423.48	6225.31	8625.51	10863	11411.7	8214.22	20393.3	11001.7	5385.26	14300.9		6.6744	8050.56	759.257	8809.82	7291.3
6.7392	5842.82	20189	6464.57	7367.42	7558.6	3540.32	11738.1	4444.82	8943.93	7084.2	16765.4	11938.4	6361.88	2540.43	2348.01	6001.1	8157.78	13425.2	3064.72	10208.8	6007.98	7339.77	2164.72	5004.41	2244.64	2065.61	19162.4	10366.1	3811.26	9331.32	1579.83	1957.7	5734.38	6379.29	6301.37	8600.07	10657.4	11546.8	8049.29	20373.9	10995.2	5302.65	14458.7		6.7392	7986.52	747.312	8733.83	7239.21
6.804	6031.28	19235.9	6862.03	7576.9	7689.25	3398.18	11748.9	4584.84	9139.1	6961.5	16399.1	11772.2	6591.46	2532.82	2346.18	5885.64	8157.66	13119.3	3111.65	10028	6033.94	7362.85	2233.58	5052.16	2229.59	1728.7	18502.6	10174.1	3831.84	9247.42	1657.88	1964.49	5618.98	6371.55	6515.42	8597.31	10525.3	11586.3	7979.6	20489.1	10973.2	5201.08	14459.1		6.804	7942.04	729.874	8671.92	7212.17
6.8688	6244.16	18255.3	7150.74	7815.32	7924.37	3298.51	11863.3	4783.92	9054.47	6820.8	16142	11722.1	6774.44	2476.44	2355.75	5577.04	7919.14	12980.3	3164.88	9866.02	5873.48	7390.4	2209.49	5115.55	2347.75	1456.31	17663.7	10169	3894.72	9300.44	1671.4	1994.34	5701.96	6402.94	6774.3	8652.32	10441	11549.2	8038.51	20737.6	10963	5131.55	14359.5		6.8688	7907.61	714.646	8622.26	7192.97
6.9336	6293.3	17560	7095.43	7833.29	8146.88	3312.41	11846.5	4858.03	8753.12	6804.67	16026.4	11847.3	6919.95	2431.3	2260.58	5161.43	7482.65	13058.8	3197.44	9747.38	5559.47	7343.35	2168.25	5180.09	2543.76	1354.94	16802.7	10361.7	3969.55	9492.16	1621.52	2124.68	5822.34	6439.48	6979.41	8726.74	10325.6	11585.3	8086.57	21005.3	11025.7	5160.31	14234.1		6.9336	7873.25	705.442	8578.7	7167.81
6.9984	6185.81	17079.7	6596.32	7766.01	8283.2	3551.47	11663.9	4721.98	8405.64	6990.44	16002.9	11938.5	7049.23	2416.89	2138.57	4771.5	7062.95	13221.4	3211.02	9689.33	5229.77	7240.49	2136.13	5259.43	2738.72	1416.17	16095.7	10573.4	3950.99	9708.55	1577.21	2297.29	5809.87	6484.37	7068.46	8807.64	10179.4	11655.8	8099.43	21191	11099.9	5216.54	14173.4		6.9984	7831.54	699.919	8531.46	7131.63
7.0632	6082.57	16646.9	5862.85	7685.34	8363.05	3832.35	11417.5	4445.22	8179.5	7247.8	15899	11825.8	7099.71	2431.2	2112.4	4508.34	6860.69	13327.2	3129.36	9683.19	4973.42	7099.4	2089.79	5271.09	2822.89	1528.09	15595.9	10654.4	3786.81	9910.54	1553.43	2464.71	5790.6	6529.5	6894.56	8903.2	10127.8	11686.6	8085.37	21205	11131.6	5257.59	14173.1		7.0632	7771.52	694.71	8466.23	7076.81
7.128	6211.39	16328.8	5244.43	7831.25	8298.57	3884.37	11224.6	4122.35	8055.72	7504.26	15795.4	11501.5	7103.55	2542.06	2177.63	4391.79	6892.91	13067.1	2998.28	9696.52	5006.02	6904.39	2079.85	5240.42	2809.18	1568.33	15303.8	10566.2	3673.08	10123.3	1520.75	2597.36	5836.77	6521.22	6547.74	8994.47	10167.4	11690	7919.69	21104.8	11143.1	5345.36	14202.9		7.128	7714.85	688.312	8403.17	7026.54
7.1928	6386.93	16284.9	4922.73	8272.44	8008.22	3783.34	11132	3865.31	8168.61	7719.39	15541.4	11027	7086.15	2661.05	2339.4	4402.07	7018.96	12653.6	2873.55	9683.53	5441.92	6694.03	2053.93	5305.56	2706.05	1506.87	15158.8	10536.9	3749.5	10222.6	1526.67	2676	5819.73	6474.05	6128.56	9080.33	10182.9	11737.8	7613.65	20981.2	11161.4	5455.63	14245.6		7.1928	7681.17	681.961	8363.13	6999.21
7.2576	6475.19	16423.2	4867.99	8731.81	7588.79	3681.6	11272.3	3749.01	8490.24	7809.44	15170	10537	7069.64	2733.89	2531.62	4448.86	7104.45	12303.8	2823.13	9546.09	6020.95	6530.1	1973.98	5439.03	2562.8	1446.98	15148.8	10646.7	3991.43	10154.5	1564.08	2774.24	5711.63	6406.25	5770.11	9121.96	10016.5	11735.4	7363.74	20962.1	11113	5550.82	14304.3		7.2576	7666.68	677.544	8344.23	6989.14
7.3224	6405.07	16455.2	4982.93	9196.61	7034.35	3621.51	11592	3771.92	8784.24	7759.46	14957.8	10236.4	7046.27	2791.82	2576.03	4533.3	7168.98	12116.5	2848.91	9387.95	6435.39	6420.89	1932	5645.81	2421.64	1443.69	15080.7	10773.9	4302.33	10068.7	1622.87	2820.72	5556.82	6361.65	5596.01	9028.95	9707.15	11594.1	7374.33	21026.5	11048.3	5642.72	14352.9		7.3224	7663.38	674.454	8337.83	6988.92
7.3872	6333.03	16242	5118.06	9492.52	6674.95	3584.47	11841.1	3843.3	9002.81	7610.7	14951.1	10282.6	6949.7	2880.9	2514.9	4666.81	7149.38	12050.4	2910.01	9353.72	6595.92	6376.56	1942.64	5819.56	2402.74	1538.2	14946.7	10817.8	4588.87	10106.9	1696.42	2771.23	5351.55	6332.26	5640.65	8953.07	9434.48	11431.3	7672.31	21052.8	11058.1	5744.05	14451.6		7.3872	7678.56	671.058	8349.62	7007.5
7.452	6373.91	16021.1	5193.73	9472.37	6574.22	3612.2	11916	3941.15	9092.57	7389.96	15123.6	10553.6	6806.35	2972.12	2439.05	4845.72	7040.74	11912.1	2961.62	9577.32	6675.62	6413.03	1979.68	5887.59	2453.56	1669.9	14832.8	10777.4	4765.13	10264.4	1775.29	2669.54	5202.17	6305.99	5781.44	8993.77	9287.3	11419.4	7971.73	20882.5	11191.3	5869.28	14621.9		7.452	7709.54	667.409	8376.95	7042.13
7.5168	6547.41	15987.2	5212.61	9417.45	6681.72	3675.53	11974.5	4085.38	9112.06	7241.15	15441.1	10829.3	6632.94	3051.58	2371.94	4989.68	6842.71	11744.1	2972.51	9946.02	6763.08	6509.43	1984.26	5908	2463.33	1730.84	14756.8	10671.2	4898.69	10385.3	1854.4	2668.75	5034.82	6291.16	5961.59	9071.45	9252.91	11589.1	8078.74	20537.8	11285.3	5972.28	14786.6		7.5168	7749.13	665.323	8414.46	7083.81
7.5816	6623.81	16100.8	5149.88	9397.01	6881.12	3615.68	12151.1	4296.31	9002.05	7265.76	15821.8	11026.6	6549.36	3103.71	2325.79	5005.06	6627.96	11690.1	2936.19	10240	6801.54	6603.44	1922.98	6027.97	2334.02	1720.72	14676.2	10524.1	4965.69	10455.2	1916.37	2724.33	4870.44	6290.81	6198.67	9131.69	9346.72	11873.2	8115.02	20240.3	11330.2	6029.74	14882.9		7.5816	7785.87	667.773	8453.65	7118.1
7.6464	6509.86	16303.8	5059.57	9587.72	6982.21	3583.68	12420.7	4541.28	8797.35	7300	16045.5	11241.2	6657.86	3115.62	2301.78	4895.76	6534.47	11922.4	2892.92	10404.5	6759.88	6581.37	1802.66	6288.36	2162.31	1697.56	14611.3	10462.6	4938.75	10580.1	1980.25	2788.93	4830.04	6299.12	6338.77	9197.03	9473.7	12119.6	8251.85	20195	11375.9	6035.81	14901		7.6464	7831.86	674.857	8506.72	7157
7.7112	6393.69	16467	5053.6	9870.03	6897.66	3713.9	12725.9	4748.61	8558.09	7344.27	16206.7	11524.3	6987.72	3164.95	2282.1	4728.18	6536.55	12420.4	2868.42	10484.4	6649.26	6448.15	1732.26	6707.55	2044.13	1692.73	14430	10515.7	5060.62	10666	2045.69	2775.8	4748.61	6333.76	6348.19	9224.63	9660.68	12180.9	8510.44	20437.3	11438.8	5984.18	14982.8		7.7112	7897.55	684.023	8581.57	7213.52
7.776	6306.56	16468.1	5154.59	9912.02	6724.5	3947.49	13053.8	4882.18	8355.6	7533.54	16297.7	11870	7370.35	3227.85	2300.31	4594.86	6550.64	12924.5	2962.77	10519.5	6665.41	6329.63	1812.74	7180.73	2002.24	1707.11	14059.2	10712	5309.77	10667.4	2118.78	2743.39	4698.3	6316.35	6341.59	9216.8	9859.35	12014	8753.06	20732.3	11381	5926.25	15180.8		7.776	7969.42	688.598	8658.02	7280.82
7.8408	6379.78	16552	5340.18	9921.84	6556.15	4141.14	13355.4	5026.29	8342.14	7837.87	16295.7	12176.3	7703.33	3276.35	2368.31	4588.93	6503.9	13249.4	3229.73	10529.9	6901.6	6336.59	1980.29	7659	2028.63	1722.87	13655.8	11027.3	5425.05	10576.3	2241.77	2776.3	4808.24	6286.86	6491.41	9209.37	10061.7	11745.4	9002.1	20994.1	11220.9	5873	15444.7		7.8408	8066.13	689.065	8755.2	7377.07
7.9056	6554.55	16854.9	5468.76	9931.7	6604.63	4128.16	13372.1	5221.1	8472.47	8052.83	16221.7	12333.3	7917.22	3333.37	2504.7	4688.52	6469.07	13488.6	3479.5	10453.9	7303.31	6486.88	2166.75	8054.08	2115.29	1751.06	13456.4	11454.3	5331.65	10417.9	2336.82	2837.17	4930.22	6259.64	6746.51	9255.88	10247.3	11598	9305.07	21119.1	11074.9	5861.83	15630.1		7.9056	8169.56	688.029	8857.59	7481.54
7.9704	6758.1	17344.3	5536.34	9934.07	6847.59	4027.3	13250.8	5479.21	8663.85	8148.08	16017.5	12261.7	7988.73	3443.06	2702.46	4816.76	6444.54	13638	3518.93	10178.7	7687.59	6740.21	2288.58	8425.11	2223.9	1762.63	13454.7	11805.5	5153.52	10374.6	2437.99	2901.08	4924.33	6232.63	6958.62	9337.27	10341	11659.7	9408.73	21180.4	11078.2	5996.84	15621		7.9704	8255.68	686.471	8942.15	7569.21
8.0352	6960.92	17651.6	5516.54	9989.23	6959.18	4046.37	13116.8	5731.56	8775.96	8367.66	15715.3	11852	7894.63	3557.66	2898.31	4940.82	6402.9	13658.4	3361.36	9725.92	7912.78	7001.89	2317.37	8694.51	2259.63	1770.33	13553	11975	4998.13	10481.7	2513.08	2939.07	4879.79	6174.68	7152.63	9525.86	10399.5	11880.3	9273.36	21177.9	11245.2	6322.23	15358.1		8.0352	8300.68	682.225	8982.91	7618.45
8.1	7256.81	17438.8	5465.53	10019.4	6938.6	4238.57	13056.2	5879.27	8796.57	8746.99	15274.7	11290.9	7656.6	3701.24	3046.17	5023.06	6380.27	13508.9	3252.8	9315.31	7976.12	7219.92	2356.61	8775.56	2218.88	1827.89	13679.4	11971.1	4855.13	10649.2	2499.63	3039.37	4740.4	6100.15	7297.24	9759.28	10427.1	12062.1	9142.01	21114.5	11394.3	6700.56	15053.5		8.1	8305.73	672.38	8978.11	7633.35
8.1648	7676.85	17160.8	5364.67	9871.75	6837.93	4593.22	13125.3	5919.69	8897.31	9196.67	14676.6	10802.2	7402.35	3864.19	3058.63	5064.86	6491.16	13234.3	3313.64	9091.53	8076.02	7396.7	2477.48	8752.96	2111.12	1930.15	13650.5	11922.9	4792.53	10855.8	2494.07	3141.84	4550.6	6094.24	7357.34	9948.29	10584	12113.6	9135.35	21013.3	11437.7	7043.75	14857.4		8.1648	8311.19	660.637	8971.83	7650.55
8.2296	8055.61	17134.2	5237.15	9776.01	6868.18	4930.65	13359.8	5873.43	9039.67	9477.03	14054.7	10552.6	7246.47	3988.37	2995.49	5060.54	6736.39	12922.5	3497.09	9014	8303.43	7506.42	2641.5	8677.4	2039.96	2053.59	13387.8	11850.8	4808.62	11121.1	2498.2	3117.26	4442.61	6125.19	7481.86	10101.9	10955.1	12008.9	9169.97	20939.7	11412.4	7292.15	14830.2		8.2296	8339.21	652.405	8991.61	7686.8
8.2944	8298.81	17315.6	5175.02	9834.91	6834.38	5082.1	13747.1	5861.44	9133.9	9660.61	13556.6	10620.5	7233.68	4123.88	2942.74	4952.28	6961.58	12654.9	3660.86	8980.29	8557.06	7559.87	2791.38	8578.1	2032.16	2210.32	13000	11830.5	4861.54	11186.2	2508.22	3120.72	4427.95	6149.72	7578.33	10253.5	11366.7	11921.6	9203.74	21009.5	11352.1	7411.17	14887.7		8.2944	8382.08	649.913	9031.99	7732.16
8.3592	8411.1	17517.2	5202.24	10120.5	6654.94	5006.11	14201	5988.46	9205.36	9814.43	13360.1	10878.9	7298.33	4195.4	2986.02	4794.78	7009.07	12597.7	3750.89	8997.15	8702.79	7578.3	2894.62	8631.34	2053.2	2362.34	12867.4	11935.8	4950.62	10928.2	2577.94	3230.58	4511.69	6192.15	7639.62	10435.9	11609	11838.9	9187.51	21294.1	11350.4	7562.52	15077.4		8.3592	8451.21	654.356	9105.57	7796.85
8.424	8438.6	17573.3	5311.06	10705.6	6428.84	4778.89	14743.7	6302.99	9406.44	9948.35	13313.4	11124.6	7376.91	4243.53	3142.48	4623.48	6908.52	12816.1	3815.63	9165.23	8793.18	7557.68	2924.9	8875.28	2058.09	2521.97	13108.3	12091.2	5136.38	10489.2	2657.86	3346.04	4759.34	6327.89	7662.68	10540.9	11640.1	11740.3	9167.26	21700.4	11443.7	7847.16	15355.4		8.424	8556.11	662.664	9218.78	7893.45
8.4888	8286.83	17205.4	5422.81	11566.9	6313.12	4608.56	15458.5	6676.33	9709.26	10014.4	13289.3	11253.2	7382.76	4367.81	3351.23	4516.86	6815.51	13251.8	3861.45	9403.26	8922.41	7482.73	2912.79	9127.04	2093.81	2652.28	13564.6	12112.7	5538.29	10206.2	2757.75	3375.88	5051.58	6538.32	7655.51	10573	11553.1	11633.4	9207.94	22210.2	11623.3	8095.78	15641.4		8.4888	8681.05	671.62	9352.67	8009.43
8.5536	8065.67	16455.5	5571.18	12322.4	6231.9	4545.63	16230.4	6997.79	9989.53	10021.4	13365	11375.9	7304.17	4500.39	3547.82	4471.41	6787.3	13654.7	3901.47	9511	9074.62	7402.93	2912.24	9299.78	2121.58	2675.28	13858	11977	6108.34	10083.4	2894.33	3287.81	5248.84	6690.33	7642.07	10635.2	11489.1	11619.6	9310.09	22700.4	11889.6	8218.02	15885.3		8.5536	8787.78	679.587	9467.37	8108.19
8.6184	7880.1	15507.7	5826.47	12793.3	6191.18	4594.01	16925.1	7270.4	10298.7	10101.2	13469.9	11612	7263.76	4496.12	3731.36	4487.11	6852.44	13680.3	3873.22	9514.92	9136.31	7418.02	2978.55	9463.37	2170.92	2632.33	13762.9	11683.1	6697.68	10089.6	2955.14	3179.36	5417.38	6726.82	7696.72	10625	11458.1	11761.8	9433.39	23043	12168.9	8371.58	16070.9		8.6184	8867.68	682.568	9550.24	8185.11
8.6832	7743.41	14624.8	6202.64	12965.3	6205.76	4667.75	17329.5	7338.49	10634.6	10305.7	13330.4	11942.2	7314.68	4468.34	3969.66	4575.42	7040.53	13513.6	3763.68	9475.46	9131.85	7554.28	3075.91	9781.69	2227.97	2558.5	13393.5	11466.3	7294.63	10266.2	2933.75	3148.51	5645.47	6735.43	7878.05	10584.3	11458.7	11995.7	9541.4	23137.8	12402	8605.35	16228.4		8.6832	8940.87	679.005	9619.88	8261.87
8.748	7645.45	14137.2	6618.56	13112.5	6377.39	4641.73	17433.5	7254.16	10951.3	10710.6	13025.9	12230.6	7451.87	4585.45	4217.12	4766.74	7280.29	13407.5	3693.9	9490.57	9187.58	7781.16	3203.18	10141.1	2239.02	2522.83	13023	11420.1	7806.44	10563.7	2897.69	3128.68	5841.81	6749.52	8086.46	10641.2	11495.2	12298	9680.5	23106.2	12649	8805.12	16403.7		8.748	9039.62	674.904	9714.52	8364.71
8.8128	7565.98	14037.4	6928.03	13238.2	6650.6	4567.86	17463.6	7171.13	11163.4	11226.8	12595.9	12488.7	7680.31	4764.51	4398.61	5119.49	7440.49	13541.5	3797.17	9489.18	9359.5	8004.05	3317.66	10452.5	2248.47	2501.89	12724.7	11625.9	8120.04	10914.4	2832.22	3072.53	5874.65	6738.6	8109.36	10838.8	11557.7	12655.6	9856	23034.3	12833.8	8928.9	16551.2		8.8128	9150.73	673.809	9824.54	8476.92
8.8776	7447.13	14265.7	7041	13316.2	6889.52	4513.95	17459	7249	11174.3	11727.6	11997.1	12737.2	7976.53	4934.6	4517.74	5545.58	7533.1	13862.2	4060.69	9459.97	9563.92	8205.41	3381.23	10697.7	2272.55	2481.71	12438.6	11969.4	8253.88	11347.6	2764.35	3012.36	5862.26	6727.72	7940.53	11075.5	11780.5	13101.3	9981.97	23002	12940.8	9075.84	16628.9		8.8776	9260.79	675.606	9936.4	8585.19
8.9424	7233.86	14470.5	6962.7	13305.1	6982.79	4512	17657.7	7431.45	11062.8	12118.7	11501.6	12935	8226.47	5162.02	4537.74	5948.65	7717.5	14133	4381.69	9419.11	9618.03	8504.2	3517.98	10907.9	2368.4	2511.7	12113.9	12357.3	8205.47	11912.5	2746.52	3029.18	5896.65	6671.64	7785.66	11288.3	12179.3	13497.3	9943.76	22966.1	12961.7	9217.37	16574.1		8.9424	9359.89	677.082	10037	8682.81
9.0072	6976.41	14546.8	6632.28	13431.4	7217.52	4707.19	18016.8	7609.94	11146.4	12375.4	11306.7	12992.9	8258.16	5283.95	4488.7	6256.73	7896.77	14291.2	4623.71	9369.71	9531.15	8920.67	3638.87	11207.3	2557	2634.69	11731.6	12580.9	8035.35	12482.7	2826.48	3082.97	5929.74	6589.42	7844.98	11505.7	12562.6	13660.2	9941.75	22936.7	12977.8	9364.57	16508.8		9.0072	9453.04	678.429	10131.5	8774.61
9.072	6859.56	14567.5	6267.6	13719	7720.77	5036.02	18429.2	7744.98	11462.2	12606.1	11379	12690.8	8151.22	5276.6	4407.67	6477.76	7911.53	14325.6	4796.56	9427.67	9399.24	9321.5	3657.65	11680.6	2748.15	2813.93	11291.7	12509.6	7892.22	13002.4	3052.84	3149.56	5966.23	6573.53	8121.57	11816.8	12814.6	13487.8	10196.7	22835.3	13117.4	9523.17	16414.1		9.072	9549.86	677.602	10227.5	8872.26
9.1368	6941.29	14842.7	6014.59	14034.7	8195.33	5340.3	18752.7	7991.86	11752.4	12798.1	11665.2	12166.5	8057.06	5259.43	4369.34	6613.55	7780.87	14385.5	4982.21	9525.98	9343.27	9593.73	3653.88	12213	2937.45	2990.13	10839.7	12222.6	8003.25	13338.5	3266.96	3248.17	6007.1	6672.44	8430.35	12089.1	12807.9	13184	10617.9	22692.4	13326.8	9649.83	16316.4		9.1368	9649.17	675.285	10324.5	8973.89
9.2016	7136.53	15349.9	6056.57	14262.6	8428.9	5567.06	19045.7	8322.59	11935.5	13053.9	11913.4	11813.3	8046.35	5287.84	4440.59	6723.66	7532.75	14698.6	5285.23	9616.24	9400.7	9803.04	3659.21	12571.1	3207.71	3165.52	10480.4	11887.3	8457.5	13379.1	3474.91	3328.5	6112.67	6855.78	8760.17	12192.6	12748.5	12841.5	10986.8	22529.1	13524.2	9729.54	16347		9.2016	9766.51	672.023	10438.5	9094.49
9.2664	7347.66	15757.3	6457.46	14153.5	8368.3	5692.44	19255.9	8677.22	12139.6	13381.1	12053.6	11879.9	8092.14	5424.4	4488.32	6868.6	7335.3	15187.9	5644.92	9596.06	9444.26	10007.5	3728.44	12684.9	3407.2	3370.42	10348.3	11582.2	9104.19	13277.5	3646.12	3467.47	6348.65	7041.83	9069.4	12096.7	12956.9	12569.6	11093.8	22419.7	13620.4	9811.73	16450.8		9.2664	9891.85	667.286	10559.1	9224.57
9.3312	7528.12	16038.9	6989.71	13833.4	8193.5	5802.82	19273.8	9028.9	12410.3	13705.4	12079.3	12365.4	8197.26	5738.4	4465.25	7070.14	7244.52	15705.3	5875.8	9559.47	9473.24	10166.4	3826.51	12578.5	3461.99	3580.38	10474.8	11293.1	9750.15	13184.8	3781.67	3616.15	6713.96	7181.24	9358.96	11852.7	13483.7	12482.7	10946.6	22354.8	13617	9871.35	16622.9		9.3312	10018.1	662.855	10681	9355.27
9.396	7645.71	16300.9	7352.61	13534.2	7962.27	5955.56	19317.8	9476.4	12760.3	14031.2	12132.3	13015.2	8261.85	6064.96	4432.29	7233.3	7218.47	15999.5	5919.03	9615.59	9537.93	10171.9	3933.68	12372.1	3445.59	3709.65	10680.7	11205.7	10298.5	13370.2	3861.29	3655.85	7158.21	7245.87	9676.22	11650.5	14140.2	12652.8	10699.1	22285.8	13557.4	9965.44	16854.7		9.396	10147.9	664.245	10812.1	9483.63
9.4608	7705.85	16601.3	7410.83	13550.5	7835.12	6004.15	19622.8	10019.3	13204.5	14141.9	12540.6	13437	8258.1	6303.05	4480.23	7358.17	7099.59	16150.6	5954.43	9730.39	9667.65	9989	4078.76	12197.4	3436.28	3715.93	10812.1	11257.5	10633.7	13773.5	3916.09	3560.02	7514.09	7325.65	10005.9	11604.1	14780.8	13016.8	10513.7	22146.7	13333.5	10172.5	17108.6		9.4608	10278.3	672.13	10950.5	9606.21
9.5256	7676.24	16770.8	7366.43	13992.2	7943.23	6012.44	20221.9	10288.1	13678	14002.7	13217.8	13474.1	8251.79	6439.09	4585.88	7502.3	6947.42	16273.1	6013.3	9978.78	9842.3	9777.21	4286.6	12173.1	3587.8	3626.53	10793.3	11305.8	10786.3	14162.2	3987.55	3451.33	7597.97	7413.13	10334.1	11664	15393.9	13436.1	10404.1	21992.1	13182.1	10469.7	17272.1		9.5256	10408.7	682.561	11091.3	9726.16
9.5904	7638.67	16667.5	7424.04	14769	8189.89	5970.94	20877.1	10123.7	14062.9	13865.4	13732.9	13385.6	8275.69	6514.39	4721.61	7560.93	6862.41	16462.7	5994.76	10178	9979.28	9800.85	4554.38	12388.7	3868.34	3522.83	10672.1	11315.7	11012.2	14509.7	4080.87	3528.33	7564.49	7442.42	10634.1	11767.1	15811.4	13675	10222.9	21861.4	13312.9	10787.2	17377.2		9.5904	10534.1	691.626	11225.8	9842.5
9.6552	7770.48	16465.6	7559.21	15481.1	8394.03	5909.29	21283.3	9755.66	14220.3	13869	13852.1	13546	8305.34	6578.16	4941.73	7545.98	6920.48	16514.8	5865.43	10275.5	10052	10053.2	4854.37	12802.1	4091.93	3471.38	10442.5	11264.2	11458.5	14713.1	4148.13	3695.32	7641.78	7434.49	10741.5	11862.6	15970.5	13579.6	10029.6	21834.9	13633.3	11013.8	17477.1		9.6552	10635.3	695.817	11331.1	9939.52
9.72	8007.78	16440.4	7775.09	15993.1	8497.25	5957.19	21592.8	9525.65	14377.9	13923.2	13697.4	14130.5	8242.08	6633.87	5154.95	7532.16	7033.54	16326.2	5794.68	10129.3	10098.6	10340.5	5114.35	13244	4058.93	3503.3	10173.6	11162.9	12075.2	14704.6	4232.65	3854.08	7789.53	7380.88	10795.7	11981.1	15778.1	13364.3	10019.3	21903.2	13968.2	11129.9	17513.5		9.72	10719.8	698.086	11417.9	10021.7
9.7848	8204.41	16747.4	8054.28	16439.6	8662.96	6177.96	22168.9	9571.81	14501.4	13950.2	13254	14962.4	8085.8	6663.91	5322.69	7625.59	7111.2	15980	5964.32	9901.87	10218.6	10513.2	5236.16	13512.5	3888.2	3583.66	9977.49	11107	12790.1	14586.7	4355.07	3970.65	7941.21	7351.74	10864.2	12121.4	15275	13105.1	10005.9	21925.3	14267.7	11232.8	17490.9		9.7848	10806.3	701.47	11507.8	10104.8
9.8496	8345.53	17320.8	8325.04	16686.4	8932.26	6532.31	22891	9840.67	14574.8	13885.5	12768.2	15649.5	7937.19	6692.5	5436.87	7802.59	7129.13	15818.2	6322.52	9815.42	10378.1	10525	5224.8	13579.3	3801.91	3652.82	9977.5	11212.2	13373.4	14547.6	4588.71	4006.24	8114.53	7368.1	11124.4	12250.2	14708.2	12983.6	9826.62	21809.5	14354.1	11335.4	17492.3		9.8496	10905.6	705.057	11610.7	10200.5
9.9144	8430.65	18056.1	8529.91	16559.4	9112.77	6931.36	23506.6	10152.7	14681.8	13914	12410.4	16068.7	7783.86	6810.32	5571.3	7989.77	7155.03	16036.6	6674.92	9873.15	10396.9	10524.4	5224.95	13600.5	3950.41	3700.64	9947.35	11220	13590.1	14672.3	4874.51	3971.51	8399.8	7385.66	11441.7	12345.4	14262.9	13092.8	9599.54	21554.7	14231.6	11528.6	17412.4		9.9144	11004.2	706.303	11710.5	10297.8
9.9792	8726.31	18626.1	8635.68	16322.4	9196.9	7313.58	23976.7	10421.1	14738.9	14117	12223.8	16179.3	7573.7	7041.42	5787.21	8139.31	7183.76	16504.6	6827.6	9850.93	10295.2	10664.1	5392.61	13729.6	4115.4	3734.14	9778.17	10994.9	13448	14917.8	5042.54	3907.01	8762	7381.59	11781.9	12485.1	14020.2	13488.2	9441.66	21393.9	14228.6	11829.7	17256.3		9.9792	11104.1	708.283	11812.4	10395.8
10.044	9130.98	18850.5	8659.39	16212.6	9462.39	7535.58	24272.5	10509.2	14774.2	14280.7	12250.9	16023.7	7366.2	7283.7	6035.26	8190.17	7191.38	17070.2	6692.19	9780.71	10280.8	10820.4	5643.7	14073.6	4257.07	3828.82	9486.24	10666.5	13130.8	15139.9	5003.93	3876.2	9139.08	7359.96	12103.4	12685.4	14013	13968	9302.55	21438.6	14376.6	12087.8	17198.3		10.044	11196.6	712.767	11909.3	10483.8
10.1088	9533.47	19004	8636.65	16270.5	10043.6	7459.74	24306.2	10496.7	14825.6	14192.7	12294.2	15895.1	7254.71	7549.65	6257.59	8185.08	7142.09	17351.4	6440.47	9837.27	10496.9	10904.6	5822.06	14486.4	4424.27	4001.52	9166.11	10530.9	12986.9	15395.2	4791.21	3900.91	9406.02	7296.04	12490	12949.5	14386.1	14325.2	9080.74	21661.2	14651.2	12259	17253.1		10.1088	11294	719.22	12013.2	10574.8
10.1736	9964.07	19265.2	8617.98	16578.1	10659.3	7173.99	24522.6	10593.5	15091.7	13985.4	12158.2	15942.1	7218.62	7863.38	6341.52	8287.63	7113.1	17307	6311.36	9997.94	10948.7	10979.3	5893.6	14848.9	4645.76	4214.11	8727.15	10532.5	13213.4	15634.5	4548.92	3981.21	9518.09	7295.94	12774.5	13215.7	14987.8	14437	8825.8	21876.5	14998	12503.6	17478.3		10.1736	11420.3	730.501	12150.8	10689.8
10.2384	10235.3	19726.4	8880.28	17059.3	11227	6955.68	24971.1	10872	15391.5	13818	11991	16161.8	7191.78	8206.68	6354.48	8523.69	7151.36	16994.9	6445.64	10156.4	11504.6	11050.3	5965.62	15031.7	4858.69	4405.7	8212.96	10455.5	13658.3	15835.2	4442.19	4077.2	9549.01	7445.84	12972.3	13436.2	15442.8	14364.4	8634.55	21960.2	15333.3	12760.5	17781.3		10.2384	11569.6	742.025	12311.6	10827.6
10.3032	10581.1	20323.1	9509.66	17508	11692.1	6889.91	25369.7	11433.5	15596.2	13774.7	11900.5	16340.9	7188.69	8487.43	6386.89	8730.16	7295.66	16799.4	6807.82	10199.9	11930.5	11086.1	6047.54	14968	4981.02	4564.65	7695.01	10125.8	14068.2	16003.5	4546.97	4209.59	9671	7621.92	13175.4	13610.1	15571.3	14220.6	8513.72	21930	15622.5	12873.1	18092.6		10.3032	11719.6	749.287	12468.9	10970.3
10.368	10867.3	21243.7	10247.3	17921.5	11945.2	6945.85	25569.5	12071.7	15716.9	13918.9	11751	16365.7	7255.38	8681.65	6418.52	8725.42	7570.49	16764.6	7172.03	10240.6	12129.7	11181.6	6069.75	14657.4	4844.34	4682.47	7317.64	9738.28	14299.3	16195.3	4688.94	4249.19	9927.94	7627.76	13339.6	13723.6	15526.5	13998.3	8496.54	21861.3	15745.8	12798.4	18285.9		10.368	11832.1	756.481	12588.5	11075.6
10.4328	10966.2	22641.2	10769.7	18176.9	12164.7	7078.42	25521.7	12509.5	15827.2	14257.3	11438.9	16188.3	7408.65	8841.1	6412.03	8594.86	7980.04	16738.8	7373.39	10446.9	12130.8	11478.1	6139.91	14277	4481.09	4744.43	7153.77	9381.94	14521.8	16434.4	4809.97	4223.97	10361.2	7417.92	13299.8	13803	15690.8	13772.7	8564.95	21770.4	15789.6	12622.4	18490.4		10.4328	11923.2	766.843	12690	11156.3
10.4976	10757.5	24222.1	10910.4	18300.8	12470.5	7276.89	25245.4	12684.9	16007.4	14570.1	11163	15821.6	7598.6	8929.02	6346.81	8392.7	8345.86	16637.9	7443.69	10693.7	12201.8	12030.6	6326.25	14041.4	4129.35	4786.35	7161.75	9272.94	14780	16600.9	4986.63	4242.3	10938.4	7164.94	13068.5	13866.6	16226.3	13635.6	8644.22	21655.7	15904.5	12465.4	18619		10.4976	12013.2	777.68	12790.9	11235.5
10.5624	10445.6	25554.6	10976.3	18503.7	12485.7	7505.67	25028.2	12603.6	16186.1	14679.8	11117	15545	7714.52	8891.27	6264.01	8247.58	8557.58	16549.1	7489.08	10774.1	12394.4	12723.1	6439.56	14051.4	3954.98	4813.89	7173.89	9463.05	14784.4	16752	5200.05	4195.11	11517.9	7042.65	12738.5	13845.5	16823.2	13542.3	8597.81	21624.2	15975.4	12422.2	18685.9		10.5624	12090.2	789.536	12879.8	11300.7
10.6272	10095.5	26343.3	11108.6	18985.1	12335.8	7618.55	25119.4	12396	16249.5	14555.3	11013.8	15447.5	7705.79	8891.58	6191.43	8157.7	8568.56	16750.2	7475.92	10878.5	12567.3	13341.2	6528.68	14259.1	3913.34	4849.79	7062.76	9766.08	14405.6	16872.4	5493.69	4176.43	11962.5	7052.24	12485.9	13772.4	17108.8	13409.9	8419.12	21734	15998.8	12470.3	18755		10.6272	12146.4	801.852	12948.2	11344.5
10.692	9746.52	26612.4	11232.6	19587.6	12266.7	7604.11	25566.2	12274.5	16253.9	14190.8	10852.5	15431.6	7614.95	9035.41	6081.04	8081.72	8429.42	17085.6	7444.16	11141.5	12604.4	13753.5	6612.47	14454.8	3945.93	4895.39	6888.89	9960.35	13972.5	16981.2	5764	4256.34	12150.4	7113.07	12432.9	13812.4	17120.6	13205.9	8110.03	21964.3	16054.7	12418.1	18848.2		10.692	12182.6	814.457	12997.1	11368.2
10.7568	9554.74	26750.8	11158.4	20091.6	12535.3	7520.71	25827.6	12296.4	16186.4	13619.8	10709.1	15694.5	7444.58	9295.74	5933.34	8006.71	8304.43	17374.4	7417.89	11438.8	12602.1	14061.1	6637.5	14494.2	3822.59	4922.89	6646.9	9971.34	13794.6	16964.6	5829.77	4385.63	12100.3	7177.35	12823.8	13962.3	17182.9	13006.7	7714.44	22161.6	16129.8	12393.1	18928.3		10.7568	12206.4	827.086	13033.5	11379.3
10.8216	9496.76	27022.6	10978.4	20612.1	12893.5	7468.14	25772.4	12367.1	16191	12956.9	10599.4	16381.2	7228.58	9406.85	5808.84	7884.25	8360.88	17485.8	7425.24	11521.5	12680.6	14445.4	6709.7	14251.3	3649.84	4945.42	6482.2	9747.42	13936.6	16834.7	5679.94	4499.14	12030.7	7191.44	13489.7	14003.4	17413.3	12894.2	7399.1	22190	16184.7	12458.2	19017.6		10.8216	12232.5	839.946	13072.4	11392.5
10.8864	9665.54	27420.6	10877.4	21186.8	13214.7	7550.48	25547.1	12336.5	16336.7	12242.9	10611.4	17238.1	7024.28	9279.57	5754.98	7747.31	8542.75	17498.4	7460.73	11388.4	12707.5	14873.9	6813.03	13894	3531.07	4940.94	6426.42	9460.7	14219.9	16758.7	5442.78	4574.62	12190.2	7228.4	14080.6	13906.7	17844.7	12775.7	7213.32	22119	16197.2	12582	19083.6		10.8864	12274.2	853.049	13127.2	11421.1
10.9512	10043.8	27693.3	10899.9	21666.2	13489.8	7846.86	25304.5	12188.5	16482.7	11558.4	10776.5	17851.3	6955.26	9072.33	5727.65	7585.4	8630	17501.4	7467.3	11203.3	12586.3	15107.6	7004.58	13620.3	3527.95	4950.73	6528.42	9234.75	14359.4	16826.8	5283.29	4623.7	12576.4	7336.45	14385.7	13794.5	18238.1	12536.6	7159.43	21973.3	16286.8	12658.9	19146.3		10.9512	12318.4	860.277	13178.7	11458.1
11.016	10676.1	27632.7	10996.6	21953.9	13870.5	8316.92	25204.2	12234.8	16614	10975.7	11107.2	18147.8	7008.69	8947.8	5766.62	7394.06	8582.34	17428.8	7331.89	11042.7	12138.2	15076	7281.13	13569.1	3550.72	4986.2	6701.25	9027.06	14296.2	16954.8	5170.33	4650.73	12887.1	7441.9	14416.5	13752.8	18449	12205.5	7213.91	21724.8	16481	12583.6	19172		11.016	12348	859.835	13207.8	11488.1
11.0808	11068.4	27416.7	11131.8	22180.5	14331.4	8685.6	25256.7	12467.1	16712.1	10441.8	11526.3	18330.7	7114.94	9126.06	5821.42	7240.6	8427.15	17159	7212.93	10839.2	11434.8	14945.9	7592.28	13424.8	3513.45	5012.97	6804.75	8733.45	14146.8	17003.4	5083.21	4625.14	13078.4	7450.39	14388.7	13791.2	18420.3	11833	7262.27	21409.9	16671.7	12557.2	19257.8		11.0808	12347.3	858.259	13205.5	11489
11.1456	10811.1	27248.2	11326.6	22189.1	14607.5	8719.6	25477.2	12727.5	16681.4	9980.02	11659.8	18444.2	7231.81	9566.45	5770.08	7075.82	8290.7	16626	7168.24	10608.5	10924.6	14759.8	7968.96	12754	3359.17	5109.6	6738.23	8437.37	13776.8	16906	5056.47	4611.01	13097.3	7338	14441.1	13816.2	18175.4	11569.8	7269.68	21177.9	16753.9	12627.6	19432.4		11.1456	12286.3	857.414	13143.7	11428.9
11.2104	10111.2	27001.4	11474.2	22131.5	14699.1	8556.92	25787.1	12791.6	16497.1	9679.98	11355.3	18247.1	7339.19	9961.41	5626.24	6838.64	8312.59	15933.4	7178.67	10450.1	10961.3	14471.1	8323.64	11576.3	3198.47	5278.35	6557.4	8108.31	13100.4	16833.7	5064.28	4671.44	12974.3	7183.67	14592.5	13727	17817	11400.2	7335.45	21124.5	16750.2	12638	19662.5		11.2104	12170.3	855.727	13026	11314.6
11.2752	9313.11	26807.4	11346.7	21945.3	14630.1	8525.79	26124.7	12742.6	16011.3	9619.18	10899	17608.2	7333.3	10242.8	5486.66	6513.24	8571.48	15361.6	7251.35	10406.4	11625.9	14255	8617.44	10350.3	3139.92	5479.36	6292.93	7825.83	12434.7	16793.5	5115.09	4813.37	12701.8	7043.53	14836.1	13544.1	17440.3	11358.5	7424.88	21076.6	16556.3	12642.2	19823.5		11.2752	12044.9	851.206	12896.1	11193.7
11.34	8641.97	26690.1	11060.2	21736.3	14477.5	8620.83	26250.8	12716.6	15316.5	9611.87	10479.1	16861.2	7200.67	10435.9	5430.74	6080.05	8976.46	15002.2	7372.63	10559.2	12537.6	14244.5	8803.06	9416.47	3263.25	5680.54	5931.51	7648.79	12119.9	16826.3	5213.56	4978.2	12500.9	6942.64	14942.7	13440.7	17035	11395.8	7354.26	21046	16196.3	12789.5	19842.7		11.34	11945.8	845.189	12791	11100.7
11.4048	8252.03	26282	10904	21704.7	13916.7	8757.22	26257.7	12574.6	14752.5	9322.57	10349	16277.3	7097.79	10644.9	5459.78	5557.23	9310.49	14928.2	7481.07	10831.8	13278.6	14364.5	8828.36	8792.42	3393.12	5889.23	5574.82	7627.54	11943.2	16881.9	5303.19	5014.44	12442.5	6906.69	14928.2	13483.6	16675.1	11364	7085.18	20975.8	15876.7	12863.9	19872.9		11.4048	11861.1	839.375	12700.5	11021.7
11.4696	8193.69	25647	11044.7	21674.8	13223.2	8996.45	26038.1	12382.9	14426.5	8612.4	10260.4	16027.2	7097.33	10969.2	5466.32	5075.26	9499.43	15039.8	7494.59	11018.2	13560.5	14517.2	8849.85	8427.01	3370.54	6101.03	5259.77	7633.95	11578.1	17050	5338.4	4886.97	12598.3	6928.69	14955.9	13562.2	16596	11088.7	6752.44	20942.9	15734.4	12671.4	19983		11.4696	11780.8	835.512	12616.3	10945.3
11.5344	8360.44	24657.9	11361.3	21522.2	12617.5	8988.09	25574.1	12214.8	14143.3	7887.95	10085.3	16137.6	7017.77	11360.1	5507.58	4723.07	9583.03	15346.7	7456.64	10871.2	13542.5	14658.6	8967.77	8209.14	3227.64	6264.4	4990.99	7625.11	11208.5	17379.1	5348.88	4657.31	12916.5	6977.97	15143.1	13576.1	16668.8	10503.2	6373.77	20958.4	15913.4	12360.9	20148.6		11.5344	11698.5	832.293	12530.8	10866.2
11.5992	8412.18	23680.2	11658.9	21274.6	12255.8	8757.75	24667.8	12160	13880.3	7409.84	9898.98	16420.2	6853.34	11594.8	5565.61	4439.21	9663.42	15688.1	7366.23	10600.2	13564.5	14690.2	9198.42	8114.85	3111.07	6333.24	4792.22	7514.42	10872.5	17861.5	5345.95	4452.21	13205.6	7025.38	15385.7	13658.3	16768.4	9830.89	5889.63	20999.2	16276.3	11985.2	20231		11.5992	11612.9	829.03	12441.9	10783.9
11.664	8234.78	22925.4	11881.2	21044.1	11974.3	8596.64	23550.7	12141	13473	7213.66	9742.93	16516.4	6808.1	11423.8	5549.17	4070.78	9796.65	15842.7	7215.24	10373.3	13641.4	14563.3	9412.21	8082.27	3034.36	6343.38	4663.54	7338.05	10313.6	18228.5	5315.67	4340.62	13334.9	7086.96	15575.8	13916.6	16760.5	9296.24	5435.82	20971.1	16701.1	11575.1	20038.3		11.664	11496.4	823.257	12319.6	10673.1
11.7288	7952.83	22234.6	11933.7	20832.7	11814.6	8522.16	22463.6	12205.3	12897.1	6999.73	9663.36	16309.1	6882.72	10893.2	5480.61	3623.7	9963.96	15627	7014.6	10295.4	13556.3	14333.6	9577.68	8009	3018.06	6313.39	4603.42	7087.45	9615.55	18284	5308.06	4250.11	13427.2	7088.81	15682.9	14198.6	16601.5	8891.19	5130.37	20797.1	16960.5	11204.1	19589.1		11.7288	11328.8	811.993	12140.8	10516.8
11.7936	7708.95	21541.5	11769.7	20560.3	11673.2	8671.33	21625.8	12311.5	12408.4	6660.63	9538.91	15856.3	6980.2	10186.1	5279.71	3215.53	10048.8	15175.7	6899.94	10316.5	13279.2	14126.4	9629.61	7747.52	2933.47	6320.9	4652.44	6940.11	9102.88	18058.1	5382.92	4182.26	13588	7004.35	15726.1	14345.3	16398.2	8519.82	4903.34	20498.1	16968.5	10888.5	19118.9		11.7936	11133.6	797.63	11931.2	10335.9
11.8584	7616.99	20596.9	11504.3	20356.9	11540.4	9064.11	21100.9	12356.3	12204.3	6206	9349.02	15420.5	7065.05	9514.35	5003.83	2866.84	9968.08	14776.8	7016.03	10404.6	12918.8	14064.6	9534.41	7490.14	2816.46	6353.27	4771.59	6789.19	8872.58	17668.5	5508.91	4223.14	13790.6	6887.17	15834.6	14252.5	16188.9	8051.33	4714.18	20178.7	16890.1	10577	18797.3		11.8584	10956	783.491	11739.4	10172.5
11.9232	7554.69	19414.1	11370.1	20167.4	11576.9	9566.87	20373.7	12253.1	12303	5649.97	9136.74	15030	7179.67	9056.88	4728.68	2568.51	9750.94	14498.1	7223.13	10537.3	12651.6	14101.6	9407.98	7309.91	2717.03	6402.23	4829.93	6550.47	8801.91	17378.9	5560.71	4397.23	13828.1	6768.05	16103.4	13942.5	15875.2	7530.08	4524.47	19960.3	16810.8	10282.1	18568.5		11.9232	10796.3	769.362	11565.7	10027
11.988	7421.5	18206.9	11494.3	19983.5	11803	9881.87	19371.8	11950.7	12404	5155.67	8916.05	14561.4	7231.13	8933.91	4509.6	2356.13	9530.59	14269.9	7390.54	10646.3	12643.6	14081.3	9361.1	7181.72	2633.85	6427.88	4583.67	6164.8	8696.06	17086.7	5507.05	4569.58	13877.7	6728.84	16529.2	13662.4	15361	7145.83	4213.89	19848.4	16805.4	9965.96	18295.1		11.988	10637	757.599	11394.6	9879.38
12.0528	7271.51	17084	11742.9	19587.9	11944.1	9887.77	18042.3	11554.9	12215.5	4773.91	8552.68	13917.1	7175.96	9019.89	4333.37	2249.11	9415.7	13865.6	7413.41	10674.9	12950.6	13944.5	9312.73	6959.42	2629.63	6399.66	4004.56	5805.19	8346	16716.4	5384.15	4735.93	13897.5	6809.34	16799.1	13522.5	14712.8	6953.98	3860.64	19833.2	16848.7	9679.09	17940.2		12.0528	10436.5	744.157	11180.6	9692.32
12.1176	7095.96	15992.2	11835.4	18946.5	11790.3	9681.9	16648.5	11306.8	11744.8	4454.21	7991.03	13015.4	6960.95	9036.47	4205.94	2177.37	9435.74	13315.7	7270.82	10661.4	13340.1	13659.5	9310.71	6711.83	2649.12	6320.64	3425.14	5445.02	7759.04	16467.9	5237.24	4814.34	13791.8	6945.82	16789.4	13339.8	14063.7	6801.83	3689.97	19943.8	16831.4	9429.95	17697.7		12.1176	10186.8	730.212	10917	9456.6
12.1824	6866.47	14991.6	11567	18176.8	11696.3	9464.76	15418.8	11214.5	11131.3	4176.95	7484.01	11868.1	6618.25	8998.36	4154.48	2087.73	9570.45	12605.9	7029.77	10513.2	13612	13210.8	9446.76	6528.28	2678.72	6224.53	2970.17	5123.51	6993.88	16455.8	5053.98	4799.87	13537.9	7089.39	16560.2	13097	13450.1	6509.78	3821.61	20287.9	16689.2	9101.77	17662.3		12.1824	9919.54	718.765	10638.3	9200.77
12.2472	6669.56	14262.7	10946.2	17551.3	11955.9	9392.46	14239.7	11188.8	10547.4	3893.09	7204	10673.7	6174.59	8921.94	4123.83	1992.18	9562.13	11912.6	6818.57	10240	13598.3	12769.6	9679.22	6493.52	2670.48	6168.36	2742.08	4819.95	6201.6	16614.5	4935.49	4760.66	13144.1	7240.76	16264.9	12903.7	12944.9	6045.66	4094.69	20775.5	16464.2	8699.22	17759.4		12.2472	9675.85	712.551	10388.4	8963.3
12.312	6486.02	14201.3	10194.6	17091	12289.5	9504.82	13029.9	11008.3	10189.7	3611.74	7378.15	9709.06	5717.61	8694.3	4033.61	1912.39	9378.66	11329.6	6628.47	9888.19	13273.8	12550.8	9945.13	6598.4	2564.23	6172.66	2686.53	4650.6	5601.92	16719.1	4891.95	4713.66	12736.7	7429.09	16036.5	12790.5	12556.5	5634.82	4293.34	21143.3	16224.6	8330.46	17914.7		12.312	9482.24	710.257	10192.5	8771.98
12.3768	6615.8	14713	9618.28	16555.3	12304.6	9715.07	11866.9	10879.7	9898.07	3392.92	7793.75	9059.9	5327.93	8393.52	3891.87	1793.22	9078.1	10955.9	6561.38	9593.62	12828.4	12631.5	10167.5	6554.57	2378.17	6204.33	2737.63	4518.7	5313.52	16616.5	4917.48	4667.23	12420.6	7535.86	15922.5	12737.5	12233	5362.43	4375.25	21222.2	16097.1	7914.47	18063.9		12.3768	9335.56	708.643	10044.2	8626.91
12.4416	7021.32	15196.7	9399.49	15706.4	11835.1	9884.22	10886.2	10726.6	9595.33	3264.97	8176.53	8651.8	5133.78	8094.15	3683.4	1671.33	8941.53	10679.9	6504.23	9384.55	12450.9	12803.2	10259.1	6243.74	2228.56	6260.65	2863.75	4448.68	5367.74	16083.9	4864.33	4560.61	12070.9	7504.41	15944.6	12735.5	11945.1	5162.34	4416.91	21082.4	16185.8	7453.12	18102.7		12.4416	9197.13	702.283	9899.41	8494.84
12.5064	7392.51	15174.5	9376.01	14727.3	11067	10003.3	10247.9	10539.2	9253.58	3243.51	8181.29	8374.24	5267.73	7875.12	3401.03	1609.98	9045.44	10199.1	6334.05	9284.63	12130.5	12830.4	10291.4	5694.38	2034.32	6310.78	3003.28	4380.88	5586.81	15275.8	4768.06	4359.33	11691.4	7386.37	15997.7	12767.4	11651.5	5050.95	4317.34	20843	16377.2	7085.94	18012.1		12.5064	9033.59	691.9	9725.49	8341.69
12.5712	7534.9	14793.6	9369.9	13718.8	10374.6	10244.9	9832.36	10190.2	8827.41	3348.6	7822.83	8125.44	5686.25	7770.05	3148.2	1607.71	9336.49	9596.6	6076.08	9349.97	11766.9	12690.2	10390.3	5032	1769.15	6288.98	3084.6	4304.09	5785.14	14482.1	4581.88	4167.02	11332.7	7338.28	15922.8	12768.2	11317.5	4963.55	4050.75	20496.1	16415.4	6874.04	17872.9		12.5712	8847.66	679.183	9526.84	8168.48
12.636	7417.09	14471	9160.5	12723.2	9935.1	10527.7	9534.31	9746.11	8283.67	3434.44	7259.85	7745.9	6250.95	7736.52	2997.19	1618.89	9616.49	9073.11	5834.21	9457.34	11364.9	12446.1	10525.1	4353.08	1495.7	6168.27	3068.84	4232.47	5889.56	13852.4	4338.69	3969.02	11159	7337.95	15808.5	12667.5	10912.6	4959.07	3683.85	20073.9	16198.2	6801.1	17714.9		12.636	8647.54	668.052	9315.6	7979.49
12.7008	7236.78	14296.5	8628.12	12178.1	10046.3	10584	9407.31	9405.1	7743.9	3380.53	6518.96	7166.89	6599.05	7800.69	2954.33	1602.82	9692.26	8725.06	5658.44	9519.51	11080.4	12074.4	10573.2	3741.73	1282.85	5975.5	3021.41	4250.09	5873.17	13327.3	4155.02	3749.67	11089.2	7294.24	15922.8	12388.8	10489.3	5037.48	3322.43	19595.4	15790.7	6794.11	17552.5		12.7008	8454.1	661.107	9115.21	7793
12.7656	7143.19	14300.6	7894.97	12086.7	10588.4	10223.9	9329.17	9152.04	7391.66	3252.34	6029.39	6451.18	6609.14	7817.2	2908.68	1591.83	9567.4	8424.65	5579.98	9543.96	10876.6	11573.9	10659.1	3278.37	1096.07	5741	3043.5	4292.34	5711.54	12839.9	4081.74	3594.29	10825.3	7240.04	15937.7	11977.3	10198	5093.28	3025.73	19152.8	15367.5	6708.48	17349.7		12.7656	8268.62	655.45	8924.07	7613.17
12.8304	7125.22	14529.9	7251.66	12016.1	10940.2	9704.04	8972.05	9086.05	7133.32	3138.52	5870.47	5756.51	6341.3	7586.07	2850.07	1607.38	9215.05	8121.53	5518.24	9596.06	10580.6	11090.6	10761.9	2986.6	939.606	5467.72	3087.66	4275.57	5462.02	12250.1	4181.63	3552.92	10261.6	7205.5	15752	11556.1	10111.4	4987.9	2791.71	18762.1	15073.9	6455.29	17199.3		12.8304	8073.34	649.608	8722.95	7423.73
12.8952	7136.93	15069.4	6855.63	11872.3	10841.9	9310.17	8409.05	9074.61	6770.61	3005.16	6059.03	5226.12	5989.98	7158.99	2831.14	1653.56	8782.54	7739.94	5455.52	9508.81	10174.4	10737.7	10877.3	2890.64	869.338	5212.04	3022.63	4167.19	5165.6	11647.1	4424.5	3571.35	9630.96	7170.11	15500.7	11193.4	10129.3	4715.18	2542.41	18410	14883.9	6029.02	17155.6		12.8952	7880.74	645.896	8526.64	7234.85
12.96	7146.37	16111.6	6643.88	11699.7	10363.7	9093.53	7803.15	8911.22	6340.48	2925.57	6031.59	4882	5706.12	6724.02	2845.93	1758.27	8375.74	7217.86	5311.24	9176.56	9888.23	10484.4	11004.8	2954.78	842.592	4998.06	2815.74	3993.76	4928.24	11273.3	4728.79	3551.73	9023.91	7142.45	15384	10919.5	10171.9	4377.21	2276.54	18161.5	14753.2	5597.31	17175.4		12.96	7709.67	649.661	8359.33	7060.01
13.0248	7149.19	17661.3	6553.3	11635.7	9945.15	8953.21	7333.52	8490.57	5875.37	3025.78	5915.34	4668.94	5446.77	6463.54	2869.92	1855.42	8237.41	6611.07	5146.48	8717.51	9786.19	10293.5	11013.5	2992.56	819.781	4852.67	2601.94	3824.72	4723.9	11226.3	4955.03	3441.1	8472.57	7132.83	15461.4	10694	9992.02	4033.6	2039.68	18037.6	14566.6	5236.03	17160.2		13.0248	7579.38	662.151	8241.53	6917.23
13.0896	7130.18	18928.6	6556.67	11869.6	9787.62	8787.29	6962.42	7892.13	5400.44	3224.5	5881.23	4491.34	5055.93	6328.58	2855.8	1837.33	8284.76	6153.57	4983.28	8333.28	9789.71	10122.3	10934.4	2906.47	794.007	4708.15	2462.78	3603.12	4502.86	11371.8	4957.92	3329.98	7803.6	7092.11	15576.8	10448.3	9366.31	3783.67	1886.78	17982.4	14423.1	4843.03	16964.7		13.0896	7451.14	676.436	8127.57	6774.7
13.1544	7103.73	18975.6	6642.27	12171.3	9800.35	8722.53	6564.48	7337.53	5046.93	3325.91	5815.95	4208.31	4608.59	6171.51	2739.37	1707.33	8339.64	5972.04	4837.31	8163.9	9667.19	9859.5	10841.7	2691.62	774.957	4543.16	2370.38	3205.3	4249.7	11462.2	4763.58	3285.12	7086.55	7015.48	15471.5	10097.4	8442.4	3686.55	1865.21	17816	14355	4513.5	16533.3		13.1544	7275.62	678.148	7953.77	6597.47
13.2192	7149.63	17837.5	6688.54	12297.7	9650.97	8841.85	6115.82	7104.93	4851.53	3274.62	5617.12	3852.85	4306.73	5947.82	2524.54	1564.85	8305.69	5963.91	4695.11	8124.24	9377.3	9461.71	10756.1	2324.98	781.587	4366.73	2255.67	2705.47	3982.04	11375.6	4490.64	3261.56	6437.8	6894.39	15150.7	9797.69	7563.39	3705.7	1973.11	17480.3	14219.9	4353.76	15984.9		13.2192	7056.21	664.639	7720.85	6391.57
13.284	7233.15	15928.5	6575.72	11934.8	9379.83	9021.19	5740.67	7026.52	4647.15	3089.44	5362.53	3407.81	4226.78	5601.58	2234.51	1454.33	8307.68	5868.04	4545.47	8080.49	9071.31	9111.72	10680.6	1966.88	791.305	4205.37	2120.07	2374.62	3796.74	11200.2	4217.69	3225.19	5995.13	6777.15	14568.8	9687.11	6866.5	3767.62	2059.28	17039.4	14005.3	4301.22	15448.8		13.284	6812.65	640.934	7453.59	6171.72
13.3488	7228.24	15676.9	6330.69	11112.6	9047.45	9248.92	5503.07	6947.25	4350.27	2792.43	5202.64	2862.91	4354.81	5220.61	1935.82	1399.57	8378.25	5664.55	4438.4	8018.06	8776.71	8900.94	10624.9	1739.75	749.772	4014.78	1955.63	2302.04	3698.52	11147.7	3994.41	3172.61	5716.76	6667.62	13945	9651.08	6321.93	3835.72	2054.55	16640.6	13823.7	4215.03	15116.9		13.3488	6622.79	632.085	7254.88	5990.71
13.4136	7236.17	15602.5	6129.46	10132.3	8584.74	9508.24	5358.11	6640.52	4040.85	2608.44	5139.38	2374.44	4644.39	4939.12	1680.88	1376.72	8379.41	5379.86	4236.68	8024.65	8375.27	8651.49	10662.3	1624.77	668.451	3768.22	1771.42	2363.72	3639.37	11137.3	3802.34	3070.32	5399.14	6530.92	13568.1	9550.13	5882.71	3875.39	2040.15	16377.2	13671.9	4115.04	15034.2		13.4136	6455.74	628.356	7084.09	5827.38
13.4784	7249.95	14731.2	6165.9	9223.65	8005.78	9533.41	5312.13	6206.29	3853.58	2535.64	5298.56	2003.77	4805.23	4831.7	1528.54	1361.62	8211.51	5084.93	4041.42	8117.85	7930.01	8176.14	10951.9	1550.3	569.417	3559.43	1627.22	2399.88	3669.59	11013.9	3662.62	2928.76	5007.52	6397.07	13447.1	9412.68	5494.82	3852.37	2099.35	16315.8	13583.9	4088.72	15071.6		13.4784	6300.3	621.135	6921.43	5679.16
13.5432	7208	14764	6391.04	8299.72	7526.88	9205.72	5264.62	5726.39	3810.79	2496.48	5567.6	1726.41	4706.89	4849.65	1445.63	1314.3	7978.8	4913.63	3896.51	8157.35	7561.14	7644.41	11340.5	1452.2	488.423	3395.92	1531.07	2341.62	3766.4	10569.5	3565.77	2838.2	4572.65	6327.99	13186.8	9271.09	5207.52	3747.39	2237.41	16369.3	13465.6	4111.31	15100		13.5432	6170.76	618.874	6789.64	5551.89
13.608	7039.39	15282.8	6569.54	8459.43	7324.94	8678.5	5236.32	5297.64	3875.43	2465.7	5657.17	1520.45	4494.98	4892.47	1348.93	1247.5	7757.07	4903.5	3826.21	8103.5	7318.01	7386.23	11540.9	1337.74	432.656	3261.75	1453.95	2246.3	3827.47	10002	3477.77	2764.1	4123.23	6302.88	12710.5	9090.48	5095.03	3662.17	2393.89	16387.7	13193.4	4161.37	15112.6		13.608	6075.9	619.091	6694.99	5456.81
13.6728	6828.72	15124.1	6537.12	8810.83	7176.27	8073.77	5248.53	4925.89	3894.69	2431.98	5430.65	1343.16	4350.4	4875.45	1257.15	1185.33	7545.95	5088.75	3787.11	7903.06	7043.2	7493.29	11422.3	1215.41	389.948	3083.72	1368.45	2070.02	3806.33	9502.18	3404.96	2774.17	3671.15	6281.95	11933.7	8851.57	5145.54	3653.14	2534.69	16324.2	12770.7	4181.31	15153.9		13.6728	5951.04	610.595	6561.64	5340.45
13.7376	6654.53	14193.6	6425	9307.77	6963.27	7467.87	5278.22	4569.01	3736.64	2427.7	4992.95	1179.97	4394.84	4742.83	1173.74	1131	7225.77	5329.56	3749.29	7654.43	6651.12	7837.94	11071.3	1067.12	378.273	2834.17	1260.82	1830.89	3717.81	9291.07	3457.16	2844.16	3285.09	6234.11	11002.3	8644.16	5252.08	3715.2	2657.45	16259.6	12208.5	4198.19	15278.4		13.7376	5804.07	596.709	6400.78	5207.36
13.8024	6520.96	14739.6	6415.87	8764.75	6772.39	6754.24	5290.35	4163.2	3478.59	2441.45	4617.35	1057.48	4459.64	4577.19	1120.36	1103.74	6832.72	5433.83	3757.05	7486.96	6290.38	8129.61	10692	882.411	355.766	2579.54	1133.59	1623.84	3543.52	9142.97	3621.36	2913.02	2957.69	6173.32	9940.68	8506.9	5278.33	3765.67	2687.01	16128.7	11644.8	4250.4	15376.1		13.8024	5660.59	592.349	6252.94	5068.24
13.8672	6440.5	15344.2	6539.64	9107.05	6699.53	5985.89	5226.44	3730.68	3121.01	2375.89	4551.1	1017.42	4356.99	4453.04	1071.94	1146.74	6473.76	5291.53	3776.2	7381.81	6044.51	8165.1	10379.8	746.095	308.27	2344.53	970.162	1527.99	3316.91	8918.25	3766.05	2984.57	2684.81	6104.99	8804.16	8505.1	5219.37	3765.04	2518.31	15936.6	11284.1	4275.52	15339.7		13.8672	5534.91	593.108	6128.02	4941.8
13.932	6458.61	15099.7	6407.34	8505.14	6758.51	5366.7	5133.73	3512.31	2724.3	2195.34	4645.95	1067.95	3959.26	4382.39	1012.49	1203.23	6297.69	5014.01	3718.75	7304.94	5942.82	7967.26	10124.6	733.149	283.157	2141.36	771.788	1511.46	3087.48	8546.22	3788.19	3024.54	2444.39	6021.88	7673.28	8483.71	5042.51	3738.35	2271.82	15795.9	11126.4	4231.65	15195.6		13.932	5365.49	584.932	5950.42	4780.55
13.9968	6529.97	14910.4	5719.08	7971.96	6884.52	4841.7	5005.43	3423.94	2329.52	1929.75	4706.2	1141.82	3420.02	4309.66	957.213	1220	6146.65	4849.69	3601.51	7162.42	5999.46	7606.14	9745.51	773.721	296.704	1993.06	636.41	1494.19	2996.73	8013.78	3650.09	3021.51	2152.48	5917.56	6555.64	8326.96	4708.07	3662.99	2145.16	15767.9	11024.6	4125.17	15094.3		13.9968	5180.69	578.563	5759.25	4602.13
