# Supplementary material for: Multiple motors cooperate to establish and maintain acentrosomal spindle bipolarity in C. elegans oocyte meiosis
Source: eLife. 2022 Feb 11;11:e72872. doi: 10.7554/eLife.72872 (PMC8963883; doi:10.7554/eLife.72872)
Supplement: Figure 2—figure supplement 2—source data 1. — The measurements (in μm) are provided for each frame (taken every 15 s) of each movie. [file elife-72872-fig2-figsupp2-data1.xlsx]

## Sheet: Spindle Length
Filename	Condition	0 sec	15 sec	30 sec	45 sec	60 sec	75 sec	90 sec	105 sec	120 sec	135 sec	150 sec	165 sec	180 sec	195 sec	210 sec	225 sec	240 sec	255 sec	270 sec	285 sec	300 sec	315 sec	330 sec	345 sec	360 sec	375 sec	390 sec	405 sec	420 sec	435 sec	450 sec
092721_SMW31_Live_ExUtero_Emb-30_NoAux_02	No Aux	8.17	8.69	8.5	8.57	8.31	8.36	8.48	8.41	8.4	8.39	8.87	8.84	8.72	8.32	8.48	8.45	8.34	8.21	8.47	8.41	8.34	8.25	8.22	8.32	8.37	8.14	8.24	8.33	8.35	8.52	8.63
092721_SMW31_Live_ExUtero_Emb-30_NoAux_03	No Aux	9.05	8.98	8.85	8.86	9.03	8.91	8.97	9.08	8.85	8.7	8.89	9	9.22	9.04	8.93	9.03	9.08	9.16	9.06	9.05	8.82	8.73	8.65	8.41	8.54	8.59	8.66	8.58	8.71	8.21	8.45
100421_SMW31_Live_ExUtero_Emb-30_NoAux_02	No Aux	11.2	11	10.9	10.7	10.8	10.7	10.6	10.8	11.1	11	11.2	11.2	10.7	10.6	10.8	11	11.2	10.9	10.8	10.9	10.7	10.6	10.5	11	10	10.2	10.3	10.5	10.7	10.9	10.8
101821_SMW31_Live_ExUtero_Emb-30_NoAux_03	No Aux	8.38	8.27	8.45	8.22	8.05	8.19	8.35	8.33	8.31	8.53	8.3	8.38	8.42	8.26	8.21	8.1	8.18	8.27	8.15	8.37	8.54	8.46	8.36	8.17	8.39	8.24	8.4	8.27	8.25	8.33	8.4
101821_SMW31_Live_ExUtero_Emb-30_NoAux_04	No Aux	9.51	9.44	9.87	9.81	9.55	9.4	9.59	9.31	9.17	9.23	9.2	9.38	9.52	9.23	9.14	9.13	9.21	9.34	9.31	9.28	9.3	9.34	9.43	9.67	9.62	9.5	9.17	9.38	9.46	9.44	9.41
092721_SMW31_Live_ExUtero_Emb-30_WithAux_01	With Aux	10.2	10.1	10	10	9.95	9.97	9.9	9.8	9.76	9.83	9.78	9.74	9.87	9.97	10	10.6	10.2	10.2	10.1	10.3	10.2	9.99	9.95	9.9	9.86	9.88	9.83	9.89	10	9.67	9.56
092721_SMW31_Live_ExUtero_Emb-30_WithAux_04	With Aux	10.1	10.7	10.7	10.5	10.2	9.82	9.53	9.67	9.91	10.2	10.1	10.3	10.3	9.96	9.93	10.1	9.98	10	10.4	10.3	10.8	10.6	10.6	10.3	10.6	10.5	10.2	10.4	10.3	10.2	9.84
101821_SMW31_Live_ExUtero_Emb-30_WithAux_01	With Aux	10.3	10.5	10.1	10.2	10.3	10.4	10.2	10.6	10.1	10.3	10.1	10	10.3	10.6	10.5	10	10.2	9.91	10.1	9.94	10	9.85	9.8	10.1	9.94	9.86	9.63	10	9.7	9.93	9.69
101821_SMW31_Live_ExUtero_Emb-30_WithAux_02	With Aux	9.95	10	10.1	10.2	10.2	10.1	9.99	9.97	9.84	9.98	9.91	10	9.64	9.82	10.1	9.87	9.84	9.81	9.78	9.72	9.7	9.96	9.71	9.63	9.78	9.82	9.94	9.98	9.99	10	10.1
101821_SMW31_Live_ExUtero_Emb-30_WithAux_03	With Aux	9.47	10	9.91	9.8	9.68	9.31	9.2	9.09	9.19	9.39	9.35	9.48	9.42	9.18	9.05	9.13	9.14	9.07	9.17	9.09	9.21	9.24	9.25	9.11	9.3	9.36	9.42	9.37	9.41	9.48	9.56
Standard Deviation	No Aux	1.20755	1.05382	1.05462	1.01117	1.09687	1.00761	0.922751	0.995806	1.13575	1.07138	1.11498	1.08931	0.883787	0.946573	1.01196	1.12133	1.20359	1.09011	1.02692	1.02858	0.94361	0.945214	0.944759	1.21278	0.76872	0.887908	0.830891	0.942322	1.01569	1.12639	1.01394
	With Aux	0.325315	0.320936	0.310998	0.260768	0.251555	0.402306	0.397656	0.544637	0.342564	0.35826	0.309629	0.308998	0.393294	0.505747	0.532006	0.530519	0.436944	0.43159	0.468188	0.501398	0.590017	0.483704	0.488334	0.462245	0.465704	0.405808	0.297372	0.368605	0.337713	0.283072	0.227156
No Aux	Baseline Value	0 sec	15 sec	30 sec	45 sec	60 sec	75 sec	90 sec	105 sec	120 sec	135 sec	150 sec	165 sec	180 sec	195 sec	210 sec	225 sec	240 sec	255 sec	270 sec	285 sec	300 sec	315 sec	330 sec	345 sec	360 sec	375 sec	390 sec	405 sec	420 sec	435 sec	450 sec
#1 Change in Length	8.17	0	0.52	0.33	0.4	0.14	0.19	0.31	0.24	0.23	0.22	0.7	0.67	0.55	0.15	0.31	0.28	0.17	0.04	0.3	0.24	0.17	0.08	0.05	0.15	0.2	-0.03	0.07	0.16	0.18	0.35	0.46
#2 Change in Length	9.05	0	-0.07	-0.2	-0.19	-0.02	-0.14	-0.08	0.03	-0.2	-0.35	-0.16	-0.05	0.17	-0.01	-0.12	-0.02	0.03	0.11	0.01	0	-0.23	-0.32	-0.4	-0.64	-0.51	-0.46	-0.39	-0.47	-0.34	-0.84	-0.6
#3 Change in Length	11.2	0	-0.2	-0.3	-0.5	-0.4	-0.5	-0.6	-0.4	-0.1	-0.2	0	0	-0.5	-0.6	-0.4	-0.2	0	-0.3	-0.4	-0.3	-0.5	-0.6	-0.7	-0.2	-1.2	-1	-0.9	-0.7	-0.5	-0.3	-0.4
#4 Change in Length	8.38	0	-0.11	0.07	-0.16	-0.33	-0.19	-0.03	-0.05	-0.07	0.15	-0.08	0	0.04	-0.12	-0.17	-0.28	-0.2	-0.11	-0.23	-0.01	0.16	0.08	-0.02	-0.21	0.01	-0.14	0.02	-0.11	-0.13	-0.05	0.02
#5 Change in Length	9.51	0	-0.07	0.36	0.3	0.04	-0.11	0.08	-0.2	-0.34	-0.28	-0.31	-0.13	0.01	-0.28	-0.37	-0.38	-0.3	-0.17	-0.2	-0.23	-0.21	-0.17	-0.08	0.16	0.11	-0.01	-0.34	-0.13	-0.05	-0.07	-0.1
Avg Change in length		0	0.014	0.052	-0.03	-0.114	-0.15	-0.064	-0.076	-0.096	-0.092	0.03	0.098	0.054	-0.172	-0.15	-0.12	-0.06	-0.086	-0.104	-0.06	-0.122	-0.186	-0.23	-0.148	-0.278	-0.328	-0.308	-0.25	-0.168	-0.182	-0.124
Std Dev		0	0.287802	0.29995	0.373229	0.237445	0.245662	0.335157	0.240894	0.210547	0.259557	0.391663	0.324145	0.377001	0.286129	0.284517	0.259615	0.188282	0.164104	0.268756	0.213659	0.285955	0.287715	0.314166	0.32874	0.584354	0.416617	0.39009	0.336526	0.262812	0.435855	0.407774
Avg Change plus Std Dev		0	0.301802	0.35195	0.343229	0.123445	0.0956624	0.271157	0.164894	0.114547	0.167557	0.421663	0.422145	0.431001	0.114129	0.134517	0.139615	0.128282	0.0781036	0.164756	0.153659	0.163955	0.101715	0.0841656	0.18074	0.306354	0.0886173	0.0820897	0.0865264	0.0948117	0.253855	0.283774
Avg Change minus Std Dev		0	-0.273802	-0.24795	-0.403229	-0.351445	-0.395662	-0.399157	-0.316894	-0.306547	-0.351557	-0.361663	-0.226145	-0.323001	-0.458129	-0.434517	-0.379615	-0.248282	-0.250104	-0.372756	-0.273659	-0.407955	-0.473715	-0.544166	-0.47674	-0.862354	-0.744617	-0.69809	-0.586526	-0.430812	-0.617855	-0.531774
With Aux	Baseline Value	0 sec	15 sec	30 sec	45 sec	60 sec	75 sec	90 sec	105 sec	120 sec	135 sec	150 sec	165 sec	180 sec	195 sec	210 sec	225 sec	240 sec	255 sec	270 sec	285 sec	300 sec	315 sec	330 sec	345 sec	360 sec	375 sec	390 sec	405 sec	420 sec	435 sec	450 sec
#1 Change in Length	10.2	0	-0.1	-0.2	-0.2	-0.25	-0.23	-0.3	-0.4	-0.44	-0.37	-0.42	-0.46	-0.33	-0.23	-0.2	0.4	0	0	-0.1	0.1	0	-0.21	-0.25	-0.3	-0.34	-0.32	-0.37	-0.31	-0.2	-0.53	-0.64
#2 Change in Length	10.1	0	0.6	0.6	0.4	0.1	-0.28	-0.57	-0.43	-0.19	0.1	0	0.2	0.2	-0.14	-0.17	0	-0.12	-0.1	0.3	0.2	0.7	0.5	0.5	0.2	0.5	0.4	0.1	0.3	0.2	0.1	-0.26
#3 Change in Length	10.3	0	0.2	-0.2	-0.1	0	0.1	-0.1	0.3	-0.2	0	-0.2	-0.3	0	0.3	0.2	-0.3	-0.1	-0.39	-0.2	-0.36	-0.3	-0.45	-0.5	-0.2	-0.36	-0.44	-0.67	-0.3	-0.6	-0.37	-0.61
#4 Change in Length	9.95	0	0.05	0.15	0.25	0.25	0.15	0.04	0.02	-0.11	0.03	-0.04	0.05	-0.31	-0.13	0.15	-0.08	-0.11	-0.14	-0.17	-0.23	-0.25	0.01	-0.24	-0.32	-0.17	-0.13	-0.01	0.03	0.04	0.05	0.15
#5 Change in Length	9.47	0	0.53	0.44	0.33	0.21	-0.16	-0.27	-0.38	-0.28	-0.08	-0.12	0.01	-0.05	-0.29	-0.42	-0.34	-0.33	-0.4	-0.3	-0.38	-0.26	-0.23	-0.22	-0.36	-0.17	-0.11	-0.05	-0.1	-0.06	0.01	0.09
Avg Change in length		0	0.256	0.158	0.136	0.062	-0.084	-0.24	-0.178	-0.244	-0.064	-0.156	-0.1	-0.098	-0.098	-0.088	-0.064	-0.132	-0.206	-0.094	-0.134	-0.022	-0.076	-0.142	-0.196	-0.108	-0.12	-0.2	-0.076	-0.124	-0.148	-0.254
Std Dev		0	0.302374	0.364445	0.268756	0.199925	0.196291	0.229891	0.32453	0.12502	0.182839	0.166373	0.271201	0.223316	0.232099	0.259365	0.296446	0.120706	0.179944	0.231689	0.267918	0.420619	0.360805	0.376723	0.229085	0.351667	0.321325	0.315595	0.254028	0.303447	0.283231	0.373269
Avg Change plus Std Dev		0	0.558374	0.522445	0.404756	0.261925	0.112291	-0.0101087	0.14653	-0.11898	0.118839	0.0103731	0.171201	0.125316	0.134099	0.171365	0.232446	-0.0112937	-0.0260556	0.137689	0.133918	0.398619	0.284805	0.234723	0.0330851	0.243667	0.201325	0.115595	0.178028	0.179447	0.135231	0.119269
Avg Change minus Std Dev		0	-0.0463739	-0.206445	-0.132756	-0.137925	-0.280291	-0.469891	-0.50253	-0.36902	-0.246839	-0.322373	-0.371201	-0.321316	-0.330099	-0.347365	-0.360446	-0.252706	-0.385944	-0.325689	-0.401918	-0.442619	-0.436805	-0.518723	-0.425085	-0.459667	-0.441325	-0.515595	-0.330028	-0.427447	-0.431231	-0.627269

## Sheet: Pole to Equator Width
File Name	Condition	Category	0 sec	15 sec	30 sec	45 sec	60 sec	75 sec	90 sec	105 sec	120 sec	135 sec	150 sec	165 sec	180 sec	195 sec	210 sec	225 sec	240 sec	255 sec	270 sec	285 sec	300 sec	315 sec	330 sec	345 sec	360 sec	375 sec	390 sec	405 sec	420 sec	435 sec	450 sec
092721_SMW31_Live_ExUtero_Emb-30_NoAux_02	No Aux	Pole 1	1.82	1.96	1.82	1.8	2.04	1.76	2.03	2.05	1.98	2.02	1.93	1.88	1.97	2.09	1.92	1.91	1.96	2.02	2	1.82	1.82	1.9	1.88	2.05	1.82	1.97	1.81	1.79	1.97	2	1.88
		Pole 2	2.02	1.92	1.95	1.72	2.01	1.88	1.79	2.03	1.9	1.85	2.14	2.23	2.17	2.06	2.13	2.07	2.23	2.3	2.11	2.08	2.2	2.06	2.14	2.08	2.08	2.15	2.08	2.11	2.37	2.23	2.26
		Equator	4.21	4.23	4.48	3.94	4.34	3.96	4.17	4.51	4.55	4.52	4.9	4.96	4.95	4.87	5.04	4.83	4.97	4.91	4.88	4.56	4.99	4.84	4.86	4.98	4.78	4.45	4.64	4.51	4.76	4.6	4.66
		Ratio	0.456057	0.458629	0.420759	0.446701	0.46659	0.459596	0.458034	0.452328	0.426374	0.428097	0.415306	0.414315	0.418182	0.426078	0.401786	0.412008	0.421529	0.439919	0.421107	0.427632	0.402806	0.409091	0.41358	0.414659	0.40795	0.462921	0.419181	0.432373	0.455882	0.459783	0.444206
092721_SMW31_Live_ExUtero_Emb-30_NoAux_03	No Aux	Pole 1	1.78	1.74	1.97	2.05	1.84	1.82	1.8	1.88	1.69	2.08	1.78	1.68	1.77	1.71	1.92	1.67	1.7	1.4	1.65	1.47	1.93	1.63	1.62	1.42	1.73	1.81	2.01	1.66	1.86	1.78	1.56
		Pole 2	1.82	1.82	1.67	1.68	1.59	1.48	1.78	1.8	1.73	1.74	1.98	1.77	1.67	1.76	1.7	1.62	1.8	2.18	1.87	1.99	1.72	1.85	1.54	1.4	1.54	1.82	1.7	1.93	1.68	1.67	1.55
		Equator	4.52	4.38	4.03	4.11	4.51	4.22	4.37	4.25	4.65	5.04	4.83	4.54	4.6	4.47	4.19	4.25	4.32	4.28	4.37	4.38	4.24	3.88	3.74	3.56	3.91	3.92	4.35	4.26	3.91	4.07	3.82
		Ratio	0.39823	0.406393	0.451613	0.453771	0.380266	0.390995	0.409611	0.432941	0.367742	0.378968	0.389234	0.379956	0.373913	0.388143	0.431981	0.387059	0.405093	0.418224	0.402746	0.394977	0.430425	0.448454	0.42246	0.396067	0.418159	0.46301	0.426437	0.421362	0.452685	0.423833	0.407068
100421_SMW31_Live_ExUtero_Emb-30_NoAux_02	No Aux	Pole 1	2.16	1.99	1.98	2.01	2.05	1.91	1.96	2.03	2.02	1.95	1.9	1.82	1.85	2.06	2.09	2.04	1.93	1.97	1.8	1.78	1.79	1.92	2.12	1.92	2.27	2.24	2.12	2.18	2.14	1.87	2.11
		Pole 2	1.94	2.11	2.12	1.9	1.83	1.76	1.82	1.87	1.92	2.06	1.91	2.16	2.21	2.47	2.46	2.42	2.35	2.39	2.15	2.18	2.17	2.27	2.23	2.31	2.42	2.33	2.05	2.31	2.24	2.34	2.5
		Equator	4.57	4.78	5.21	4.86	4.76	4.72	4.64	4.61	4.85	4.77	4.5	4.66	5.18	5.15	5.24	4.96	5	4.82	4.78	4.92	4.89	5.24	4.8	4.96	5.15	5.14	5.19	5.28	5.29	5.33	5.17
		Ratio	0.448578	0.42887	0.393474	0.402263	0.407563	0.388771	0.407328	0.422993	0.406186	0.420335	0.423333	0.427039	0.391892	0.439806	0.43416	0.449597	0.428	0.452282	0.41318	0.402439	0.404908	0.399809	0.453125	0.426411	0.45534	0.444553	0.401734	0.425189	0.413989	0.394934	0.445841
101821_SMW31_Live_ExUtero_Emb-30_NoAux_03	No Aux	Pole 1	1.51	1.62	1.47	1.63	1.82	1.53	1.48	1.55	1.74	1.68	1.55	1.39	1.36	1.39	1.7	1.58	1.5	1.57	1.75	1.36	1.59	1.86	1.6	1.49	1.58	1.66	1.8	1.73	1.81	1.84	1.9
		Pole 2	1.64	1.92	1.61	1.77	1.69	1.84	1.61	1.67	1.55	1.47	1.39	1.43	1.57	1.49	1.58	1.54	1.53	1.51	1.78	1.9	1.83	1.74	1.81	1.56	1.42	1.7	1.73	2.02	1.93	1.69	1.64
		Equator	4.34	4.59	4.3	4.17	4.57	4.5	4.19	4.16	4.36	4.48	3.9	4.05	3.83	4.08	4.19	4.01	4.18	4.44	4.5	4.39	4.56	4.47	4.24	4.3	4.37	4.45	4.67	5.16	4.74	4.82	4.6
		Ratio	0.362903	0.385621	0.35814	0.407674	0.384026	0.374444	0.368735	0.387019	0.377294	0.351562	0.376923	0.348148	0.382507	0.352941	0.391408	0.389027	0.36244	0.346847	0.392222	0.371298	0.375	0.402685	0.402123	0.354651	0.343249	0.377528	0.377944	0.363372	0.394515	0.366183	0.384783
101821_SMW31_Live_ExUtero_Emb-30_NoAux_04	No Aux	Pole 1	1.76	1.87	1.91	1.82	1.88	1.84	2.04	1.81	1.98	1.71	1.97	1.85	1.8	1.69	1.79	1.83	2.09	1.73	1.9	1.95	1.91	1.96	1.75	1.77	1.89	1.85	1.82	1.78	1.97	1.94	2.08
		Pole 2	1.96	2.15	2.11	2.07	2.16	2.08	2	1.95	2	1.81	1.87	1.94	1.95	2.13	2.02	2.09	2.03	1.9	1.92	1.8	1.73	1.77	1.92	1.7	1.91	1.84	1.92	2.04	1.81	1.95	1.97
		Equator	4.56	4.9	4.66	4.49	4.64	4.89	5.01	4.71	4.56	4.58	4.57	4.8	4.71	4.66	4.92	4.84	4.96	5.05	4.99	4.63	4.88	4.73	4.77	4.58	4.69	4.7	4.93	4.96	4.81	4.92	5.1
		Ratio	0.407895	0.410204	0.43133	0.433185	0.435345	0.400818	0.403194	0.399151	0.436404	0.384279	0.420131	0.394792	0.398089	0.409871	0.387195	0.404959	0.415323	0.359406	0.382766	0.404968	0.372951	0.394292	0.384696	0.378821	0.405117	0.392553	0.37931	0.385081	0.392931	0.395325	0.397059
092721_SMW31_Live_ExUtero_Emb-30_WithAux_01	With Aux	Pole 1	2.08	2.17	1.89	1.88	1.91	1.87	2.21	2.13	2	2.17	2.15	1.88	2.08	2.17	2.34	2.29	2.21	2.09	2.21	1.97	2.07	2.12	2.05	1.99	1.93	2.03	2.06	2.08	2.04	2.13	2.01
		Pole 2	1.97	1.99	1.88	2.12	2.01	1.96	2	2.1	2.27	2.32	2.21	2.3	1.95	2.18	2.3	1.9	2.19	2.45	2.14	2.26	1.9	1.92	1.94	1.99	1.81	1.99	2.28	2.33	2.43	2.26	2.42
		Equator	5.44	5.31	4.85	4.93	5.14	5.18	5.22	5.59	5.4	5.81	5.74	5.86	5.53	5.58	5.81	5.69	5.9	6.02	5.92	5.83	4.83	4.97	4.9	5.08	5.03	5.16	5.51	5.63	5.69	5.73	5.6
		Ratio	0.372243	0.391714	0.38866	0.40568	0.381323	0.369691	0.403257	0.378354	0.39537	0.386403	0.379791	0.356655	0.364376	0.389785	0.399312	0.36819	0.372881	0.377076	0.367399	0.362779	0.410973	0.406439	0.407143	0.391732	0.371769	0.389535	0.393829	0.391652	0.392794	0.383072	0.395536
092721_SMW31_Live_ExUtero_Emb-30_WithAux_04	With Aux	Pole 1	2.05	2.07	2.03	2.06	2.05	1.99	2.15	2.2	2.25	2.43	1.88	1.99	1.84	1.71	2.08	1.89	2	1.91	1.82	1.92	1.81	1.71	1.52	1.64	1.63	1.79	1.72	1.58	1.71	1.78	1.81
		Pole 2	1.62	1.72	1.83	1.74	1.67	1.54	1.62	1.98	1.89	1.95	1.96	1.61	1.95	1.73	1.72	1.97	2.04	1.99	1.95	1.85	1.82	1.7	1.96	1.64	1.58	1.65	1.74	1.75	1.6	1.82	1.87
		Equator	4.75	4.56	4.66	4.87	4.9	4.33	4.42	4.81	4.92	5.08	4.99	4.56	4.82	4.64	4.52	4.8	4.84	4.93	4.77	4.7	4.8	4.59	4.85	4.38	4.31	4.2	4.68	4.51	4.28	4.41	4.66
		Ratio	0.386316	0.41557	0.414163	0.390144	0.379592	0.407621	0.426471	0.434511	0.420732	0.431102	0.38477	0.394737	0.393154	0.37069	0.420354	0.402083	0.417355	0.395538	0.395178	0.401064	0.378125	0.37146	0.358763	0.374429	0.37239	0.409524	0.369658	0.36918	0.386682	0.408163	0.39485
101821_SMW31_Live_ExUtero_Emb-30_WithAux_01	With Aux	Pole 1	2.08	2.11	1.95	1.97	1.99	1.87	1.8	1.5	1.72	1.68	1.92	1.99	2.14	2.01	1.7	1.89	1.8	1.83	1.88	1.8	1.69	1.77	1.83	1.8	1.7	1.74	1.85	1.89	1.65	1.87	1.8
		Pole 2	2.16	1.96	1.97	2.03	2.12	2.16	2.15	2.1	1.82	1.79	1.88	1.84	1.98	2.06	1.9	1.94	1.77	1.86	1.97	1.9	2.11	1.9	1.85	2.1	2.23	1.89	1.86	1.56	1.91	1.8	1.74
		Equator	4.72	4.83	4.52	4.32	4.66	4.46	4.31	4.27	4.24	4.12	4.25	4.53	4.78	4.54	4.37	4.26	4.4	4.51	4.67	4.8	4.79	4.56	4.68	4.65	4.62	4.44	4.21	4.42	4.51	4.35	4.18
		Ratio	0.449153	0.421325	0.433628	0.462963	0.440987	0.451794	0.458237	0.421546	0.417453	0.421117	0.447059	0.422737	0.430962	0.448238	0.411899	0.449531	0.405682	0.409091	0.412206	0.385417	0.39666	0.402412	0.393162	0.419355	0.425325	0.408784	0.440618	0.390271	0.394678	0.421839	0.423445
101821_SMW31_Live_ExUtero_Emb-30_WithAux_02	With Aux	Pole 1	2.08	1.97	1.98	1.79	2.06	1.9	1.91	1.94	1.98	2.03	2.35	2.07	2.15	2.25	2.1	2.03	1.99	2.19	2	1.89	1.84	1.79	2.02	2.15	2.08	2.02	2.05	2.06	2.2	2.1	2.01
		Pole 2	1.94	1.88	2.01	2.05	2.14	2.3	2.36	2.22	2.18	2.08	2.1	2.08	2.4	1.87	2.21	2.24	2.23	2.11	2.24	2.16	2.41	2.28	2.43	2.21	2.18	2.07	2.11	2.25	2.16	2.2	2.12
		Equator	4.68	4.53	4.59	4.75	4.82	5.03	4.92	5.04	5.12	5.01	5.1	5.13	5.08	4.95	4.87	4.83	5.08	5.04	5.05	4.9	5.07	4.91	5.03	5.24	5.15	4.98	4.85	4.94	4.9	5.01	5
		Ratio	0.429487	0.424945	0.434641	0.404211	0.435685	0.417495	0.433943	0.412698	0.40625	0.41018	0.436275	0.404483	0.447835	0.416162	0.442505	0.442029	0.415354	0.426587	0.419802	0.413265	0.419132	0.41446	0.442346	0.416031	0.413592	0.410643	0.428866	0.436235	0.444898	0.429142	0.413
101821_SMW31_Live_ExUtero_Emb-30_WithAux_03	With Aux	Pole 1	2.35	1.92	1.85	1.95	1.91	1.96	1.82	1.79	2.01	2	2.02	1.9	1.83	1.84	1.64	1.79	1.83	1.78	1.72	1.9	1.95	2.1	1.78	2.16	2.03	1.91	1.75	1.78	1.93	1.97	1.96
		Pole 2	2.37	2.07	2.05	1.94	1.8	1.84	1.74	1.77	1.96	1.77	2.15	1.91	1.87	1.91	1.98	1.96	2.04	1.99	2	2.07	2.1	2.23	2.4	2.58	2.37	1.95	1.86	1.88	1.8	2	1.98
		Equator	5.86	5.12	4.84	4.83	4.6	4.81	4.56	4.37	4.64	4.59	4.68	4.41	4.58	4.67	4.66	4.89	4.96	4.9	4.5	4.87	4.58	4.92	4.83	5.12	5.07	4.24	4.58	4.58	4.6	4.95	4.58
		Ratio	0.40273	0.389648	0.402893	0.402692	0.403261	0.39501	0.390351	0.407323	0.427802	0.410675	0.445513	0.431973	0.40393	0.401499	0.388412	0.383436	0.390121	0.384694	0.413333	0.407598	0.44214	0.440041	0.432712	0.462891	0.433925	0.455189	0.394105	0.399563	0.405435	0.40101	0.430131
	No Aux	Average Ratio	0.414733	0.417943	0.411063	0.428719	0.414758	0.402925	0.40938	0.418887	0.4028	0.392649	0.404986	0.39285	0.392916	0.403368	0.409306	0.40853	0.406477	0.403336	0.402404	0.400263	0.397218	0.410866	0.415197	0.394122	0.405963	0.428113	0.400921	0.405475	0.422001	0.408012	0.415791
		Average Upper Std Dev	0.453003	0.430217	0.427279	0.438999	0.431031	0.417706	0.423631	0.430586	0.416171	0.406735	0.414227	0.40663	0.400452	0.418633	0.4193	0.419828	0.418116	0.424639	0.409315	0.409326	0.407884	0.420561	0.426588	0.406889	0.424025	0.446173	0.410871	0.418804	0.435701	0.423842	0.428239
		Average Lower Std Dev	0.376462	0.40567	0.394847	0.418438	0.398485	0.388144	0.395129	0.407187	0.389428	0.378562	0.395744	0.37907	0.385381	0.388103	0.399312	0.397232	0.394838	0.382032	0.395493	0.3912	0.386551	0.401171	0.403806	0.381354	0.387901	0.410053	0.390971	0.392147	0.4083	0.392181	0.403344
	With Aux	Average Ratio	0.407986	0.40864	0.414797	0.413138	0.408169	0.408322	0.422452	0.410886	0.413521	0.411895	0.418681	0.402117	0.408051	0.405275	0.412496	0.409054	0.400279	0.398597	0.401584	0.394024	0.409406	0.406962	0.406825	0.412888	0.4034	0.414735	0.405415	0.39738	0.404898	0.408645	0.411392
		Average Upper Std Dev	0.439338	0.41613	0.423667	0.425896	0.421199	0.42182	0.434342	0.42023	0.419238	0.419339	0.433677	0.415238	0.422636	0.418341	0.421761	0.425023	0.408651	0.407427	0.41105	0.403119	0.420152	0.417989	0.421706	0.427852	0.416588	0.425576	0.418318	0.408319	0.415345	0.416728	0.418548
		Average Lower Std Dev	0.376634	0.401151	0.405927	0.400379	0.39514	0.394824	0.410561	0.401543	0.407804	0.404451	0.403686	0.388996	0.393467	0.392208	0.403232	0.393084	0.391907	0.389767	0.392117	0.384929	0.39866	0.395936	0.391945	0.397923	0.390212	0.403893	0.392512	0.386442	0.39445	0.400562	0.404237
No Aux	Baseline Value	0 sec	15 sec	30 sec	45 sec	60 sec	75 sec	90 sec	105 sec	120 sec	135 sec	150 sec	165 sec	180 sec	195 sec	210 sec	225 sec	240 sec	255 sec	270 sec	285 sec	300 sec	315 sec	330 sec	345 sec	360 sec	375 sec	390 sec	405 sec	420 sec	435 sec	450 sec
#1 Change in Ratio	0.456057	0	0.00257183	-0.0352981	-0.0093565	0.0105329	0.00353895	0.00197657	-0.00372885	-0.0296834	-0.0279597	-0.0407509	-0.0417425	-0.0378752	-0.029979	-0.0542713	-0.0440487	-0.0345278	-0.0161385	-0.0349504	-0.0284254	-0.0532514	-0.0469661	-0.0424768	-0.0413984	-0.0481072	0.00686434	-0.036876	-0.0236845	-0.000174654	0.0037256	-0.011851
#2 Change in Ratio	0.39823	0	0.00816261	0.0533828	0.0555412	-0.017964	-0.00723483	0.0113809	0.0347111	-0.0304882	-0.0192618	-0.00899613	-0.0182741	-0.024317	-0.0100869	0.0337508	-0.0111713	0.0068625	0.0199942	0.00451591	-0.00325292	0.0321944	0.0502235	0.0242298	-0.00216267	0.0199285	0.0647801	0.0282067	0.0231314	0.0544553	0.0256028	0.00883797
#3 Change in Ratio	0.448578	0	-0.0197074	-0.0551036	-0.0463143	-0.0410147	-0.0598065	-0.0412501	-0.0255842	-0.0423921	-0.0282423	-0.0252443	-0.0215391	-0.0566858	-0.00877186	-0.0144174	0.00101909	-0.0205777	0.00370448	-0.0353978	-0.0461387	-0.0436697	-0.0487685	0.00454732	-0.0221664	0.00676213	-0.00402515	-0.0468436	-0.0233883	-0.034589	-0.0536433	-0.00273629
#4 Change in Ratio	0.362903	0	0.0227177	-0.00476369	0.0447706	0.021123	0.0115412	0.00583186	0.024116	0.0143904	-0.0113407	0.0140199	-0.0147551	0.0196033	-0.00996205	0.0285049	0.0261242	-0.000463034	-0.0160564	0.029319	0.00839518	0.0120968	0.0397813	0.0392194	-0.00825206	-0.0196538	0.0146249	0.0150411	0.000468867	0.0316115	0.00327935	0.0218794
#5 Change in Ratio	0.407895	0	0.00230934	0.0234357	0.0252901	0.0274501	-0.00707674	-0.00470112	-0.00874399	0.0285088	-0.0236153	0.0122366	-0.0131031	-0.00980556	0.00197651	-0.0206996	-0.00293606	0.00742784	-0.0484888	-0.0251292	-0.00292713	-0.0349439	-0.013603	-0.0231987	-0.0290738	-0.00277747	-0.0153415	-0.0285844	-0.0228141	-0.0149633	-0.0125695	-0.0108359
Avg Change in Ratio		0	0.00321082	-0.00366936	0.0139862	2.54619e-05	-0.0118076	-0.00535238	0.00415401	-0.0119329	-0.0220839	-0.00974699	-0.0218828	-0.0218161	-0.0113647	-0.00542652	-0.00620255	-0.00825564	-0.011397	-0.0123285	-0.0144698	-0.0175148	-0.00386655	0.000464212	-0.0206107	-0.00876958	0.0133805	-0.0138112	-0.00925732	0.00726797	-0.00672102	0.00105883
Std Dev		0	0.0152603	0.0436941	0.0417831	0.0287903	0.0279637	0.0209038	0.0247238	0.0312873	0.00703873	0.0237177	0.0115697	0.0288958	0.0115629	0.0366951	0.0253222	0.0185561	0.0256586	0.0283992	0.022246	0.0374593	0.0469026	0.0334937	0.0158054	0.0262994	0.0308782	0.0333141	0.0208281	0.0357802	0.0295376	0.0142878
Avg Change plus Std Dev		0	0.0184711	0.0400247	0.0557693	0.0288158	0.0161561	0.0155514	0.0288779	0.0193544	-0.0150452	0.0139707	-0.010313	0.00707972	0.000198238	0.0312686	0.0191197	0.0103005	0.0142616	0.0160707	0.00777619	0.0199446	0.0430361	0.0339579	-0.0048053	0.0175298	0.0442587	0.0195029	0.0115708	0.0430482	0.0228166	0.0153466
Avg Change minus Std Dev		0	-0.0120495	-0.0473634	-0.0277969	-0.0287649	-0.0397713	-0.0262562	-0.0205698	-0.0432202	-0.0291227	-0.0334647	-0.0334525	-0.0507118	-0.0229276	-0.0421216	-0.0315248	-0.0268117	-0.0370556	-0.0407277	-0.0367158	-0.0549741	-0.0507692	-0.0330295	-0.036416	-0.035069	-0.0174976	-0.0471254	-0.0300854	-0.0285122	-0.0362586	-0.0132289
With Aux	Baseline Value	0 sec	15 sec	30 sec	45 sec	60 sec	75 sec	90 sec	105 sec	120 sec	135 sec	150 sec	165 sec	180 sec	195 sec	210 sec	225 sec	240 sec	255 sec	270 sec	285 sec	300 sec	315 sec	330 sec	345 sec	360 sec	375 sec	390 sec	405 sec	420 sec	435 sec	450 sec
#1 Change in Ratio	0.372243	0	0.0194711	0.0164171	0.0334369	0.00908031	-0.00255153	0.0310141	0.00611156	0.0231277	0.0141601	0.00754829	-0.0155874	-0.00786652	0.0175423	0.0270689	-0.00405284	0.000638709	0.00483376	-0.004844	-0.00946392	0.0387304	0.034196	0.0349002	0.0194896	-0.000473263	0.0172922	0.0215868	0.0194092	0.0205517	0.0108289	0.0232931
#2 Change in Ratio	0.386316	0	0.0292544	0.0278473	0.00382795	-0.00672395	0.0213055	0.0401548	0.0481956	0.0344159	0.0447866	-0.00154625	0.00842105	0.00683774	-0.0156261	0.0340382	0.0157675	0.0310396	0.00922174	0.00886241	0.014748	-0.00819079	-0.0148561	-0.0275529	-0.0118866	-0.013926	0.023208	-0.0166577	-0.0171362	0.000366454	0.0218475	0.008534
#3 Change in Ratio	0.449153	0	-0.0278275	-0.0155242	0.0138104	-0.00816542	0.00264118	0.00908412	-0.0276069	-0.0316997	-0.028036	-0.00209372	-0.0264152	-0.0181902	-0.000914657	-0.0372532	0.000377974	-0.0434707	-0.0400616	-0.036947	-0.0637359	-0.0524928	-0.0467403	-0.0559901	-0.0297977	-0.0238279	-0.0403688	-0.00853497	-0.058881	-0.0544741	-0.0273135	-0.0257076
#4 Change in Ratio	0.429487	0	-0.00454237	0.00515334	-0.0252767	0.00619747	-0.0119921	0.00445591	-0.0167888	-0.0232372	-0.0193075	0.00678733	-0.0250037	0.0183475	-0.0133256	0.013018	0.0125418	-0.0141328	-0.00289988	-0.0096852	-0.0162219	-0.010355	-0.0150269	0.0128587	-0.0134566	-0.0158949	-0.0188446	-0.0006212	0.00674764	0.0154108	-0.000345463	-0.0164872
#5 Change in Ratio	0.40273	0	-0.0130819	0.000162187	-3.8864e-05	0.000530494	-0.00771998	-0.0123795	0.00459228	0.0250713	0.00794501	0.0427824	0.0292424	0.00119976	-0.00123145	-0.0143184	-0.0192948	-0.0126094	-0.0180365	0.010603	0.00486716	0.0394094	0.0373103	0.0299818	0.0601602	0.0311947	0.0524583	-0.00862557	-0.00316706	0.00270441	-0.00172027	0.0274006
Avg Change in Ratio		0	0.000654738	0.00681115	0.00515194	0.00018378	0.000336596	0.0144659	0.00290077	0.00553562	0.00390962	0.0106956	-0.00586857	6.56486e-05	-0.0027111	0.00451069	0.00106794	-0.00770694	-0.0093885	-0.00640216	-0.0139613	0.00142023	-0.0010234	-0.00116045	0.00490179	-0.00458548	0.00674904	-0.00257053	-0.0106055	-0.00308814	0.000659437	0.00340659
Std Dev		0	0.0234464	0.0164364	0.0213869	0.00762986	0.0129446	0.0211163	0.0290826	0.0305759	0.0289476	0.0184944	0.0240819	0.0139424	0.0131822	0.0297988	0.0140452	0.0269968	0.0200396	0.0191597	0.030338	0.0386422	0.0360116	0.0392734	0.0356694	0.0216942	0.0365599	0.0146463	0.0301269	0.029946	0.0183133	0.0236689
Avg Change plus Std Dev		0	0.0241012	0.0232475	0.0265389	0.00781364	0.0132812	0.0355822	0.0319834	0.0361115	0.0328572	0.02919	0.0182133	0.0140081	0.0104711	0.0343095	0.0151131	0.0192899	0.0106511	0.0127575	0.0163767	0.0400624	0.0349882	0.038113	0.0405712	0.0171087	0.043309	0.0120758	0.0195214	0.0268579	0.0189727	0.0270755
Avg Change minus Std Dev		0	-0.0227917	-0.00962525	-0.016235	-0.00744608	-0.012608	-0.00665047	-0.0261818	-0.0250403	-0.0250379	-0.00779881	-0.0299505	-0.0138768	-0.0158933	-0.0252881	-0.0129772	-0.0347038	-0.0294281	-0.0255618	-0.0442993	-0.037222	-0.037035	-0.0404339	-0.0307677	-0.0262797	-0.0298109	-0.0172169	-0.0407324	-0.0330341	-0.0176539	-0.0202623
