# Supplementary material for: Multiple motors cooperate to establish and maintain acentrosomal spindle bipolarity in C. elegans oocyte meiosis
Source: eLife. 2022 Feb 11;11:e72872. doi: 10.7554/eLife.72872 (PMC8963883; doi:10.7554/eLife.72872)
Supplement: Figure 2—source data 1. — The equator and pole widths are listed for each spindle, as well as the calculated pole/equator ratio; data for unarrested (control(RNAi)) and metaphase I-arrested (emb-30(RNAi)) spindles are listed in separate tabs. [file elife-72872-fig2-data1.xlsx]

## Sheet: Unarrested (empty vector RNAi)
No Auxin						With Auxin					Average Ratio		Standard Error
File Name	Equator Width	Pole Width 1	Pole Width 2	Pole/Equator Ratio		File Name	Equator Width	Pole Width 1	Pole Width 2	Pole/Equator Ratio	No Auxin	With Auxin	No Auxin	With Auxin
022019_EV 0minAux_28	4.78	2.24	2.13	0.457113		031620_EV 30minAux_01	5.44	4.13	3.88	0.736213	0.431717	0.74675	0.00555521	0.0129523
022019_EV 0minAux_29	4.19	1.89	1.72	0.430788		031620_EV 30minAux_02	3.84	2.09	3.43	0.71875
022019_EV 0minAux_30	4.44	2.01	2.09	0.461712		031620_EV 30minAux_06	5.34	3.47	3.24	0.628277
032519_EV 0minAux_04	4.59	1.75	2.15	0.424837		110619_EV 30minAux_05	3.51	2.23	2.45	0.666667
032519_EV 0minAux_11	4.81	1.95	1.92	0.402287		110619_EV 30minAux_06	5.36	3.82	3.12	0.647388
032519_EV 0minAux_15	4.35	2.53	1.97	0.517241		110619_EV 30minAux_15	4.88	3.02	3.85	0.703893
040819_EV 0minAux_06	3.87	1.71	1.59	0.426357		110619_EV 30minAux_16	4.18	2.73	2.84	0.666268
040819_EV 0minAux_11	4.04	2.11	1.98	0.506188		110619_EV 30minAux_23	4.95	4.14	3.34	0.755556
040819_EV 0minAux_16	4.13	1.64	1.88	0.42615		110619_EV 45minAux_01	3.35	2.27	2.12	0.655224
040819_EV 0minAux_21	4.26	1.83	1.72	0.416667		110619_EV 45minAux_04	3.95	2.18	3.21	0.682278
040819_EV 0minAux_27	3.71	1.79	1.83	0.487871		110619_EV 45minAux_07	4.75	2.63	5.54	0.86
040819_EV 0minAux_28	4.29	2.01	2.05	0.473193		110619_EV 45minAux_08	4.82	3.03	3.97	0.726141
042419_EV 0minAux_15	4.58	1.92	2.09	0.437773		110619_EV 45minAux_10	3.91	3.78	3.56	0.938619
042419_EV 0minAux_21	4.22	1.78	1.76	0.419431		110619_EV 45minAux_12	4.5	3.17	4.34	0.834444
050119_EV 0minAux_02	4.13	1.56	1.6	0.382567		110619_EV 45minAux_14	4.74	2.76	3.62	0.672996
050119_EV 0minAux_13	3.69	1.88	1.81	0.5		110619_EV 45minAux_15	4.85	3.25	4.27	0.775258
050119_EV 0minAux_19	4.15	1.74	1.85	0.43253		110619_EV 45minAux_18	3.46	2.29	2.74	0.726879
050619_EV 0minAux_18	3.88	1.44	1.72	0.407216		110619_EV 45minAux_21	3.97	3.76	3.34	0.894207
050619_EV 0minAux_23	4.07	1.84	1.82	0.449631		110619_EV 45minAux_25	4.07	2.64	2.98	0.690418
050819_EV 0minAux_02	4.02	1.43	1.34	0.344527		110619_EV 45minAux_27	4.87	3.81	3.65	0.765914
050819_EV 0minAux_08	4.12	1.59	1.75	0.40534		110619_EV 45minAux_28	4.21	2.92	2.4	0.631829
050819_EV 0minAux_10	4.03	1.61	1.6	0.398263		111119_EV 30minAux_05	3.55	2.61	2.64	0.739437
050819_EV 0minAux_11	4.05	1.71	1.55	0.402469		111119_EV 30minAux_10	3.68	2.49	2.98	0.743207
031620_EV 0minAux_02	4.01	1.73	1.68	0.425187		111119_EV 30minAux_11	3.53	2.78	2.68	0.773371
031620_EV 0minAux_03	3.89	1.8	1.68	0.447301		111119_EV 45minAux_02	4.24	3.92	3.25	0.845519
031620_EV 0minAux_13	4.24	1.7	1.63	0.392689		111119_EV 45minAux_03	4.67	3.84	3.65	0.801927
111119_EV 0minAux_02	4.67	2.05	1.77	0.408994		111119_EV 45minAux_06	4.77	3.49	3.76	0.759958
111119_EV 0minAux_07	4.51	1.64	1.92	0.394678		111119_EV 45minAux_07	4.6	3.8	4.47	0.898913
111119_EV 0minAux_12	4.71	1.92	1.98	0.414013		111119_EV 45minAux_09	5.24	4.38	4.3	0.828244
071320_EV 0hrAux_03	3.98	1.59	1.74	0.418342		111119_EV 45minAux_12	5.78	4.99	4.96	0.860727
071320_EV 0hrAux_13	4.17	1.87	1.97	0.460432		111119_EV 45minAux_13	4.11	2.73	2.59	0.647202
071320_EV 0hrAux_15	3.74	1.7	1.66	0.449198		111119_EV 45minAux_14	4.55	3.9	3.61	0.825275
071320_EV 0hrAux_19	4.55	1.81	1.77	0.393407		111119_EV 45minAux_16	5.21	3.85	3.93	0.746641
071320_EV 0hrAux_26	4.42	2.17	2.04	0.476244		111119_EV 45minAux_18	4.64	3.32	2.73	0.65194
071320_EV 0hrAux_27	3.66	1.71	1.61	0.453552		111119_EV 45minAux_19	4.36	2.95	2.94	0.675459
071320_EV 0hrAux_35	4.31	1.79	1.69	0.403712		111119_EV 45minAux_21	7.68	6.02	6.26	0.799479
071320_EV 0hrAux_51	3.94	1.85	1.65	0.444162		111119_EV 45minAux_22	4.07	2.96	3.22	0.759214
071320_EV 0hrAux_55	4.08	1.69	1.55	0.397059		111119_EV 45minAux_23	4.17	2.48	2.67	0.617506
071320_EV 0hrAux_61	4.23	1.92	1.79	0.438534		111119_EV 45minAux_24	4.82	3.57	3.79	0.763485
071320_EV 0hrAux_66	4.93	2.24	2.16	0.446247		111119_EV 45minAux_25	4.72	3.16	3.97	0.755297
071320_EV 0hrAux_68	4.49	1.88	1.95	0.426503

## Sheet: Arrested (emb-30 RNAi)
No Auxin						With Auxin					Average Ratio		Standard Error
File Name	Equator Width	Pole Width 1	Pole Width 2	Pole/Equator Ratio		File Name	Equator Width	Pole Width 1	Pole Width 2	Pole/Equator Ratio	No Auxin	With Auxin	No Auxin	With Auxin
070620_Emb30 0minAux_01	4.46	2.44	2.16	0.515695		070620_Emb30 30minAux_01	4.72	3.21	3.01	0.658898	0.476345	0.708481	0.0072767	0.0132069
070620_Emb30 0minAux_02	5.7	2.5	2.91	0.474561		070620_Emb30 30minAux_10	5.11	3.43	2.99	0.62818
070620_Emb30 0minAux_09	5.52	2.68	2.78	0.494565		070620_Emb30 30minAux_23	5.18	3.14	3.04	0.596525
070620_Emb30 0minAux_10	3.73	1.68	1.75	0.459786		070620_Emb30 30minAux_26	5.16	3.38	3.73	0.688953
070620_Emb30 0minAux_11	3.88	1.59	1.77	0.43299		070620_Emb30 30minAux_33	5.92	4.17	4.51	0.733108
070620_Emb30 0minAux_15	4.5	1.72	2.06	0.42		070620_Emb30 30minAux_34	4.84	2.97	2.83	0.599174
070620_Emb30 0minAux_17	5.16	2.08	1.96	0.391473		072020_Emb30 30minAux_01	3.72	2.71	3.1	0.780914
070620_Emb30 0minAux_22	4.34	2.18	1.87	0.46659		072020_Emb30 30minAux_02	4.68	3.76	2.88	0.709402
070620_Emb30 0minAux_33	5.15	2.21	2.1	0.418447		072020_Emb30 30minAux_03	3.63	2.38	2.32	0.647383
072020_Emb30 0minAux_01	4.19	2.2	1.93	0.49284		072020_Emb30 30minAux_06	5.13	4.35	3.51	0.766082
072020_Emb30 0minAux_02	4.37	2.16	2.28	0.508009		072020_Emb30 30minAux_07	5.75	3.9	3.45	0.63913
072020_Emb30 0minAux_03	4.59	2.12	1.99	0.447712		072020_Emb30 30minAux_08	5.29	4.29	3.34	0.721172
072020_Emb30 0minAux_05	4.21	1.86	1.82	0.437055		072020_Emb30 30minAux_11	5.31	3.44	3.22	0.627119
072020_Emb30 0minAux_06	4.55	2.45	2.13	0.503297		072020_Emb30 30minAux_13	4.55	3.27	3.34	0.726374
072020_Emb30 0minAux_07	4.94	2.4	2.36	0.481781		072020_Emb30 30minAux_14	3.54	2.43	2.25	0.661017
072020_Emb30 0minAux_08	4.73	2.39	2.51	0.51797		072020_Emb30 30minAux_15	4.89	3.81	3.48	0.745399
072020_Emb30 0minAux_09	4.51	2.09	2.04	0.457871		072020_Emb30 30minAux_23	5.33	3.71	3.5	0.67636
072020_Emb30 0minAux_11	4.89	2.35	2.56	0.502045		072020_Emb30 30minAux_24	5.14	3.13	3.6	0.654669
072020_Emb30 0minAux_15	5.01	2.87	2.77	0.562874		072020_Emb30 30minAux_26	3.63	2.46	2.73	0.714876
072020_Emb30 0minAux_16	5.17	2.92	2.78	0.551257		072020_Emb30 30minAux_27	5.24	3.81	4.58	0.800573
072020_Emb30 0minAux_18	5.76	2.9	2.99	0.511285		072020_Emb30 30minAux_28	4.36	3.04	3.03	0.696101
072020_Emb30 0minAux_22	5.25	2.83	2.39	0.497143		072020_Emb30 30minAux_29	4.86	3.51	3.69	0.740741
072020_Emb30 0minAux_23	5.82	2.75	2.82	0.478522		072020_Emb30 30minAux_30	4.59	2.05	3.31	0.583878
072020_Emb30 0minAux_24	4.89	2.43	2.17	0.470348		072020_Emb30 30minAux_36	4.88	3.03	3.34	0.652664
072020_Emb30 0minAux_27	5.48	2.82	2.86	0.518248		072020_Emb30 30minAux_37	5.09	3.87	3.63	0.736739
072020_Emb30 0minAux_30	4.82	2.81	2.41	0.541494		072020_Emb30 30minAux_42	4.19	2.93	2.51	0.649165
072020_Emb30 0minAux_32	5.23	2	2.71	0.450287		072020_Emb30 30minAux_44	4.88	3.3	3.05	0.650615
072020_Emb30 0minAux_33	4.21	1.67	1.79	0.410926		072020_Emb30 30minAux_45	5.53	4.67	3.75	0.761302
072020_Emb30 0minAux_35	5.34	2.98	2.58	0.520599		072020_Emb30 30minAux_47	5.44	4.5	3.99	0.780331
072020_Emb30 0minAux_39	4.63	1.78	2.01	0.409287		072020_Emb30 30minAux_48	5.69	3.69	3.77	0.655536
072020_Emb30 0minAux_40	4.22	1.69	2.23	0.464455		072020_Emb30 30minAux_53	4.2	2.55	2.86	0.644048
072020_Emb30 0minAux_41	4.52	1.92	2.06	0.440265		072020_Emb30 30minAux_54	5.75	5.35	4.48	0.854783
072020_Emb30 0minAux_44	5.1	2.6	2.74	0.523529		072020_Emb30 30minAux_56	4.93	3.72	2.78	0.659229
072020_Emb30 0minAux_46	5.13	2.19	2.23	0.430799		072020_Emb30 30minAux_59	4.89	4.56	4.8	0.957055
072020_Emb30 0minAux_47	4.7	2.27	2.13	0.468085		072020_Emb30 30minAux_61	3.28	1.9	1.88	0.57622
						072020_Emb30 30minAux_63	4.69	4.47	3.83	0.884861
						072020_Emb30 30minAux_64	4.32	3.33	3.06	0.739583
						072020_Emb30 30minAux_67	4.4	3.14	2.79	0.673864
						072020_Emb30 30minAux_68	6.48	5.76	5.85	0.895833
						072020_Emb30 30minAux_71	4.79	3.67	3.72	0.771399
						072020_Emb30 30minAux_72	4.57	2.63	2.6	0.57221
						072020_Emb30 30minAux_73	3.51	2.1	2.28	0.623932
						072020_Emb30 30minAux_75	5.31	3.4	4.21	0.716573
