# Supplementary material for: Multiple motors cooperate to establish and maintain acentrosomal spindle bipolarity in C. elegans oocyte meiosis
Source: eLife. 2022 Feb 11;11:e72872. doi: 10.7554/eLife.72872 (PMC8963883; doi:10.7554/eLife.72872)
Supplement: Figure 4—source data 1. — The chromosome segregation distances (in μm) for each timepoint are shown for control spindles (control(RNAi) without auxin), dynein-depleted spindles (control(RNAi) with auxin), and mini spindles (klp-18(RNAi) with auxin). The compiled data is in the first tab, and raw data for each condition is listed in separate tabs. [file elife-72872-fig4-data1.xlsx]

## Sheet: Compiled data
Condition	File name	0 sec	15 sec	30 sec	45 sec	60 sec	75 sec	90 sec	105 sec	120 sec	135 sec	150 sec	165 sec	180 sec	195 sec	210 sec	225 sec	240 sec
Empty vector RNAi, No auxin	091420_SMW46_EV_NoAux_01	0.97	1.06	1.68	2.16	2.76	3.23	3.62	4.11	4.38	4.41	4.37	4.56	4.62	4.78	5.03	5.27	5.3
Empty vector RNAi, No auxin	092120_SMW46_EV_NoAux_02	1.05	1.12	1.37	1.92	2.63	3.16	3.4	3.75	3.9	4.06	4.1	4.1	4.43	4.61	4.7	4.91	5.12
Empty vector RNAi, No auxin	080320_SMW46_EV_NoAux_02	0.99	1.19	1.61	2.27	2.55	2.72	3.05	3.32	3.55	3.7	4.07	4.22	4.28	4.42	4.7	4.88	4.94
Empty vector RNAi, No auxin	070521_SMW46_EV_NoAux_06	1.04	1.15	1.44	2.1	2.49	2.79	2.93	3.35	3.63	3.92	4.18	4.54	4.64	4.78	4.88	4.84	4.86
Empty vector RNAi, No auxin	070521_SMW46_EV_NoAux_04	1.01	1.12	1.52	2.06	2.52	2.87	3.44	3.87	4.08	4.27	4.63	4.71	4.98	4.87	4.85	5.07
Empty vector RNAi, + auxin	071220_SMW46_EV_WithAux_01	0.944	1.16	1.42	1.86	2.25	2.47	2.83	3.37	3.95	4.58	5.36	5.85	6.59	6.98	7.1	7.12	7.17
Empty vector RNAi, + auxin	071220_SMW46_EV_WithAux_02	0.981	1.33	1.72	2.06	2.41	2.66	2.97	3.49	3.91	4.55	5.24	5.78	6.26	6.53	6.73	6.87	6.95
Empty vector RNAi, + auxin	091420_SMW46_EV_WithAux_01	1.09	1.42	1.85	2.1	2.71	3.1	3.4	3.8	4.05	4.23	4.42	4.79	5.12	5.43	6.1	6.22	6.13
Empty vector RNAi, + auxin	091420_SMW46_EV_WithAux_03	1.09	1.41	1.69	2.15	2.71	3.38	4.06	4.61	5.62	6.9	6.83	7.09	7.06	6.92	7.16	6.94	6.94
Empty vector RNAi, + auxin	092120_SMW46_EV_WithAux_03	0.916	1.42	1.71	1.87	2.39	2.59	2.82	3.53	4.03	4.44	4.98	5.29	5.72	5.75	6.13	6.12	6.19
klp-18(RNAi), + auxin	062920_SMW46_Klp-18_01	0.808571	0.945714	1.05343	1.47429	1.94429	2.44714	2.86	3.70714	4.32429	4.68429	4.97	5.35286	5.45286	5.46714	5.49857	5.40857	5.45571
klp-18(RNAi), + auxin	062920_SMW46_Klp-18_02	0.936667	1.31144	1.75444	1.98889	2.60111	3.15556	3.52222	4.1	4.36111	4.65	5.01889	5.42556	5.65	5.86222	6.05	6.08	6.08667
klp-18(RNAi), + auxin	080320_SMW46_Klp-18_01	0.932	1	1.45	1.782	2.092	2.782	3.446	3.866	4.144	4.554	4.816	4.992	5.33	5.474	5.466
klp-18(RNAi), + auxin	102620_SMW46_Klp-18_02	0.999	1.08	1.23333	1.54333	1.67667	1.87333	2.11333	2.24333	2.546	3.13	3.422	3.72	4.14	4.496	4.666
klp-18(RNAi), + auxin	102620_SMW46_Klp-18_03	1.07217	1.185	1.225	1.43167	1.65333	1.79333	2.03167	2.295	2.62833	2.84667	3.08	3.29667	3.60833	3.89833	4.17333	4.415	4.545
	EV No Aux AVERAGE	1.012	1.128	1.524	2.102	2.59	2.954	3.288	3.68	3.908	4.072	4.27	4.426	4.59	4.692	4.832	4.994	5.055
	EV No Aux Upper SEM	1.02697	1.15551	1.59618	2.17643	2.65258	3.08544	3.454	3.87672	4.10334	4.23404	4.40435	4.57329	4.74199	4.79523	4.91194	5.09636	5.16828
	EV No Aux Lower SEM	0.997033	1.10049	1.45182	2.02757	2.52742	2.82256	3.122	3.48328	3.71266	3.90996	4.13565	4.27871	4.43801	4.58877	4.75206	4.89164	4.94172
	EV With Aux AVERAGE	1.0042	1.348	1.678	2.008	2.494	2.84	3.216	3.76	4.312	4.94	5.366	5.76	6.15	6.322	6.644	6.654	6.676
	EV With Aux Upper SEM	1.04071	1.39794	1.74838	2.06812	2.58639	3.0119	3.45185	3.98383	4.64	5.43383	5.76619	6.14335	6.48761	6.63478	6.87222	6.85638	6.89084
	EV With Aux Lower SEM	0.967686	1.29806	1.60762	1.94788	2.40161	2.6681	2.98015	3.53617	3.984	4.44617	4.96581	5.37665	5.81239	6.00922	6.41578	6.45162	6.46116
	Mini Spindles AVERAGE	0.949681	1.10443	1.34324	1.64403	1.99348	2.41027	2.79464	3.2423	3.60075	3.97299	4.26138	4.55742	4.83624	5.03954	5.17078	5.30119	5.36246
	Mini Spindles Upper SEM	0.993172	1.17002	1.46377	1.74939	2.16631	2.67142	3.11121	3.64454	4.01637	4.37803	4.67874	4.99708	5.24113	5.40328	5.50375	5.67581	5.70907
	Mini Spindles Lower SEM	0.90619	1.03884	1.22271	1.53867	1.82065	2.14913	2.47808	2.84005	3.18512	3.56795	3.84402	4.11776	4.43135	4.6758	4.83781	4.92657	5.01585

## Sheet: EV no auxin Raw Data
091420_SMW46_EV_NoAux_01
Frame 56	Frame 57	Frame 58	Frame 59	Frame 60	Frame 61	Frame 62	Frame 63	Frame 64	Frame 65	Frame 66	Frame 67	Frame 68	Frame 69	Frame 70	Frame 71	Frame 72	Frame 73	Frame 74	Frame 75	Frame 76	Frame 77	Frame 78	Frame 79	Frame 80	Frame 81	Frame 82	Frame 83	Frame 84
1.06	1.37	1.68	2.16	2.76	3.23	3.62	4.11	4.38	4.41	4.37	4.56	4.62	4.78	5.03	5.27	5.3	5.27	5.42
AVG DIST	AVG DIST	AVG DIST	AVG DIST	AVG DIST	AVG DIST	AVG DIST	AVG DIST	AVG DIST	AVG DIST	AVG DIST	AVG DIST	AVG DIST	AVG DIST	AVG DIST	AVG DIST	AVG DIST	AVG DIST	AVG DIST	AVG DIST	AVG DIST	AVG DIST	AVG DIST	AVG DIST	AVG DIST	AVG DIST	AVG DIST	AVG DIST	AVG DIST
1.06	1.37	1.68	2.16	2.76	3.23	3.62	4.11	4.38	4.41	4.37	4.56	4.62	4.78	5.03	5.27	5.3	5.27	5.42	#DIV/0!	#DIV/0!	#DIV/0!	#DIV/0!	#DIV/0!	#DIV/0!	#DIV/0!	#DIV/0!	#DIV/0!	#DIV/0!
Onset of Anaphase A																End of Segregation		No visible spindles
092120_SMW46_EV_NoAux_02
Frame 17	Frame 18	Frame 19	Frame 20	Frame 21	Frame 22	Frame 23	Frame 24	Frame 25	Frame 26	Frame 27	Frame 28	Frame 29	Frame 30	Frame 31	Frame 32	Frame 33	Frame 34	Frame 35	Frame 36	Frame 33	Frame 34	Frame 35	Frame 36	Frame 37	Frame 38	Frame 39	Frame 40	Frame 41
1.12	1.37	1.92	2.63	3.16	3.4	3.75	3.9	4.06	4.1	4.1	4.43	4.61	4.7	4.91	5.12	5.28	5.36
AVG DIST	AVG DIST	AVG DIST	AVG DIST	AVG DIST	AVG DIST	AVG DIST	AVG DIST	AVG DIST	AVG DIST	AVG DIST	AVG DIST	AVG DIST	AVG DIST	AVG DIST	AVG DIST	AVG DIST	AVG DIST	AVG DIST	AVG DIST	AVG DIST	AVG DIST	AVG DIST	AVG DIST	AVG DIST	AVG DIST	AVG DIST	AVG DIST	AVG DIST
1.12	1.37	1.92	2.63	3.16	3.4	3.75	3.9	4.06	4.1	4.1	4.43	4.61	4.7	4.91	5.12	5.28	5.36	#DIV/0!	#DIV/0!	#DIV/0!	#DIV/0!	#DIV/0!	#DIV/0!	#DIV/0!	#DIV/0!	#DIV/0!	#DIV/0!	#DIV/0!
Onset of Anaphase A															End of Segregation		No visible spindles
080320_SMW46_EV_NoAux_02
Frame 23	Frame 24	Frame 25	Frame 26	Frame 27	Frame 28	Frame 29	Frame 30	Frame 31	Frame 32	Frame 33	Frame 34	Frame 35	Frame 36	Frame 37	Frame 38	Frame 39	Frame 40	Frame 41	Frame 42	Frame 43	Frame 44	Frame 45	Frame 46	Frame 47	Frame 48	Frame 49	Frame 50	Frame 51
0.99	1.19	1.51	2.07	2.55	2.72	3.05	3.32	3.55	3.7	4.07	4.22	4.28	4.42	4.7	4.88	4.94	5.07	5.1	5.05
AVG DIST	AVG DIST	AVG DIST	AVG DIST	AVG DIST	AVG DIST	AVG DIST	AVG DIST	AVG DIST	AVG DIST	AVG DIST	AVG DIST	AVG DIST	AVG DIST	AVG DIST	AVG DIST	AVG DIST	AVG DIST	AVG DIST	AVG DIST	AVG DIST	AVG DIST	AVG DIST	AVG DIST	AVG DIST	AVG DIST	AVG DIST	AVG DIST	AVG DIST
0.99	1.19	1.51	2.07	2.55	2.72	3.05	3.32	3.55	3.7	4.07	4.22	4.28	4.42	4.7	4.88	4.94	5.07	5.1	5.05	#DIV/0!	#DIV/0!	#DIV/0!	#DIV/0!	#DIV/0!	#DIV/0!	#DIV/0!	#DIV/0!	#DIV/0!
Onset of Anaphase A																	End of Segregation		No visible spindles
080320_SMW46_EV_NoAux_06
Frame 13	Frame 14	Frame 15	Frame 16	Frame 17	Frame 18	Frame 19	Frame 20	Frame 21	Frame 22	Frame 23	Frame 24	Frame 25	Frame 26	Frame 27	Frame 28	Frame 29	Frame 30	Frame 31	Frame 32	Frame 33	Frame 34	Frame 35	Frame 36	Frame 37	Frame 38	Frame 39	Frame 40	Frame 41
1.04	1.15	1.44	2.1	2.49	2.79	2.93	3.35	3.63	3.92	4.18	4.54	4.64	4.78	4.88	4.84	4.86
AVG DIST	AVG DIST	AVG DIST	AVG DIST	AVG DIST	AVG DIST	AVG DIST	AVG DIST	AVG DIST	AVG DIST	AVG DIST	AVG DIST	AVG DIST	AVG DIST	AVG DIST	AVG DIST	AVG DIST	AVG DIST	AVG DIST	AVG DIST	AVG DIST	AVG DIST	AVG DIST	AVG DIST	AVG DIST	AVG DIST	AVG DIST	AVG DIST	AVG DIST
1.04	1.15	1.44	2.1	2.49	2.79	2.93	3.35	3.63	3.92	4.18	4.54	4.64	4.78	4.88	4.84	4.86	#DIV/0!	#DIV/0!	#DIV/0!	#DIV/0!	#DIV/0!	#DIV/0!	#DIV/0!	#DIV/0!	#DIV/0!	#DIV/0!	#DIV/0!	#DIV/0!
Onset of Anaphase A																End of Segregation
080320_SMW46_EV_NoAux_04
Frame 10	Frame 11	Frame 12	Frame 13	Frame 14	Frame 15	Frame 16	Frame 17	Frame 18	Frame 19	Frame 20	Frame 21	Frame 22	Frame 23	Frame 24	Frame 25	Frame 26	Frame 27	Frame 28	Frame 29	Frame 30	Frame 31	Frame 32	Frame 33	Frame 34	Frame 35	Frame 36	Frame 37	Frame 38
1.01	1.12	1.52	2.06	2.52	2.87	3.44	3.87	4.08	4.27	4.63	4.71	4.98	4.87	4.85	5.07
AVG DIST	AVG DIST	AVG DIST	AVG DIST	AVG DIST	AVG DIST	AVG DIST	AVG DIST	AVG DIST	AVG DIST	AVG DIST	AVG DIST	AVG DIST	AVG DIST	AVG DIST	AVG DIST	AVG DIST	AVG DIST	AVG DIST	AVG DIST	AVG DIST	AVG DIST	AVG DIST	AVG DIST	AVG DIST	AVG DIST	AVG DIST	AVG DIST	AVG DIST
1.01	1.12	1.52	2.06	2.52	2.87	3.44	3.87	4.08	4.27	4.63	4.71	4.98	4.87	4.85	5.07	#DIV/0!	#DIV/0!	#DIV/0!	#DIV/0!	#DIV/0!	#DIV/0!	#DIV/0!	#DIV/0!	#DIV/0!	#DIV/0!	#DIV/0!	#DIV/0!	#DIV/0!
Onset of Anaphase A															End of Segregation

## Sheet: EV with auxin Raw Data
071220_SMW46_EV_WithAux_02
Frame 34	Frame 35	Frame 36	Frame 37	Frame 38	Frame 39	Frame 40	Frame 41	Frame 42	Frame 43	Frame 44	Frame 45	Frame 46	Frame 47	Frame 48	Frame 49	Frame 50	Frame 51	Frame 52	Frame 53	Frame 54	Frame 55	Frame 56	Frame 57	Frame 58	Frame 59	Frame 60	Frame 61	Frame 62	Frame 63	Frame 64	Frame 65	Frame 66	Frame 67	Frame 68	Frame 69	Frame 70	Frame 71	Frame 72	Frame 73	Frame 74
0.944	1.16	1.42	1.86	2.25	2.47	2.83	3.37	3.95	4.58	5.36	5.85	6.59	6.98	7.1	7.12	7.17	7.23	7.18	7.27	7.17
AVG DIST	AVG DIST	AVG DIST	AVG DIST	AVG DIST	AVG DIST	AVG DIST	AVG DIST	AVG DIST	AVG DIST	AVG DIST	AVG DIST	AVG DIST	AVG DIST	AVG DIST	AVG DIST	AVG DIST	AVG DIST	AVG DIST	AVG DIST	AVG DIST	AVG DIST	AVG DIST	AVG DIST	AVG DIST	AVG DIST	AVG DIST	AVG DIST	AVG DIST	AVG DIST	AVG DIST	AVG DIST	AVG DIST	AVG DIST	AVG DIST	AVG DIST	AVG DIST	AVG DIST	AVG DIST	AVG DIST	AVG DIST
0.944	1.16	1.42	1.86	2.25	2.47	2.83	3.37	3.95	4.58	5.36	5.85	6.59	6.98	7.1	7.12	7.17	7.23	7.18	7.27	7.17	#DIV/0!	#DIV/0!	#DIV/0!	#DIV/0!	#DIV/0!	#DIV/0!	#DIV/0!	#DIV/0!	#DIV/0!	#DIV/0!	#DIV/0!	#DIV/0!	#DIV/0!	#DIV/0!	#DIV/0!	#DIV/0!	#DIV/0!	#DIV/0!	#DIV/0!	#DIV/0!
Onset of Anaphase A														End of Segregation						No visible spindles
071220_SMW46_EV_WithAux_02
Frame 8	Frame 9	Frame 10	Frame 11	Frame 12	Frame 13	Frame 14	Frame 15	Frame 16	Frame 17	Frame 18	Frame 19	Frame 20	Frame 21	Frame 22	Frame 23	Frame 24	Frame 25	Frame 26	Frame 27	Frame 28	Frame 29	Frame 30	Frame 31	Frame 32	Frame 33	Frame 34	Frame 35	Frame 36	Frame 37	Frame 38	Frame 39	Frame 40	Frame 41	Frame 42	Frame 43	Frame 44	Frame 45	Frame 46	Frame 47	Frame 48
0.981	1.33	1.72	2.06	2.41	2.66	2.97	3.49	3.91	4.55	5.24	5.78	6.26	6.53	6.73	6.87	6.85
AVG DIST	AVG DIST	AVG DIST	AVG DIST	AVG DIST	AVG DIST	AVG DIST	AVG DIST	AVG DIST	AVG DIST	AVG DIST	AVG DIST	AVG DIST	AVG DIST	AVG DIST	AVG DIST	AVG DIST	AVG DIST	AVG DIST	AVG DIST	AVG DIST	AVG DIST	AVG DIST	AVG DIST	AVG DIST	AVG DIST	AVG DIST	AVG DIST	AVG DIST	AVG DIST	AVG DIST	AVG DIST	AVG DIST	AVG DIST	AVG DIST	AVG DIST	AVG DIST	AVG DIST	AVG DIST	AVG DIST	AVG DIST
0.981	1.33	1.72	2.06	2.41	2.66	2.97	3.49	3.91	4.55	5.24	5.78	6.26	6.53	6.73	6.87	6.85	#DIV/0!	#DIV/0!	#DIV/0!	#DIV/0!	#DIV/0!	#DIV/0!	#DIV/0!	#DIV/0!	#DIV/0!	#DIV/0!	#DIV/0!	#DIV/0!	#DIV/0!	#DIV/0!	#DIV/0!	#DIV/0!	#DIV/0!	#DIV/0!	#DIV/0!	#DIV/0!	#DIV/0!	#DIV/0!	#DIV/0!	#DIV/0!
Onset of Anaphase A														End of Segregation		No visible spindles
091420_SMW46_EV_WithAux_03
Frame 7	Frame 8	Frame 9	Frame 10	Frame 11	Frame 12	Frame 13	Frame 14	Frame 15	Frame 16	Frame 17	Frame 18	Frame 19	Frame 20	Frame 21	Frame 22	Frame 23	Frame 24	Frame 25	Frame 26	Frame 27	Frame 28	Frame 29	Frame 30	Frame 31	Frame 32	Frame 33	Frame 34	Frame 35	Frame 36	Frame 37	Frame 38	Frame 39	Frame 40	Frame 41	Frame 42	Frame 43	Frame 44	Frame 45	Frame 46	Frame 47
1.09	1.41	1.69	2.15	2.71	3.38	4.06	4.61	5.62	6.9	6.83	7.09	7.06	6.92	7.16	6.94	6.94
AVG DIST	AVG DIST	AVG DIST	AVG DIST	AVG DIST	AVG DIST	AVG DIST	AVG DIST	AVG DIST	AVG DIST	AVG DIST	AVG DIST	AVG DIST	AVG DIST	AVG DIST	AVG DIST	AVG DIST	AVG DIST	AVG DIST	AVG DIST	AVG DIST	AVG DIST	AVG DIST	AVG DIST	AVG DIST	AVG DIST	AVG DIST	AVG DIST	AVG DIST	AVG DIST	AVG DIST	AVG DIST	AVG DIST	AVG DIST	AVG DIST	AVG DIST	AVG DIST	AVG DIST	AVG DIST	AVG DIST	AVG DIST
1.09	1.41	1.69	2.15	2.71	3.38	4.06	4.61	5.62	6.9	6.83	7.09	7.06	6.92	7.16	6.94	6.94	#DIV/0!	#DIV/0!	#DIV/0!	#DIV/0!	#DIV/0!	#DIV/0!	#DIV/0!	#DIV/0!	#DIV/0!	#DIV/0!	#DIV/0!	#DIV/0!	#DIV/0!	#DIV/0!	#DIV/0!	#DIV/0!	#DIV/0!	#DIV/0!	#DIV/0!	#DIV/0!	#DIV/0!	#DIV/0!	#DIV/0!	#DIV/0!
Onset of Anaphase A														End of Segregation		No visible spindles
092120_SMW46_EV_WithAux_03
Frame 24	Frame 25	Frame 26	Frame 27	Frame 28	Frame 29	Frame 30	Frame 31	Frame 32	Frame 33	Frame 34	Frame 35	Frame 36	Frame 37	Frame 38	Frame 39	Frame 40	Frame 18	Frame 19	Frame 20	Frame 21	Frame 22	Frame 23	Frame 24	Frame 25	Frame 26	Frame 27	Frame 28	Frame 29	Frame 30	Frame 31	Frame 32	Frame 33	Frame 34	Frame 35	Frame 36	Frame 37	Frame 38	Frame 39	Frame 40	Frame 41
0.916	1.42	1.71	1.87	2.39	2.59	2.82	3.53	4.03	4.44	4.98	5.29	5.72	5.75	6.13	6.12	6.19
AVG DIST	AVG DIST	AVG DIST	AVG DIST	AVG DIST	AVG DIST	AVG DIST	AVG DIST	AVG DIST	AVG DIST	AVG DIST	AVG DIST	AVG DIST	AVG DIST	AVG DIST	AVG DIST	AVG DIST	AVG DIST	AVG DIST	AVG DIST	AVG DIST	AVG DIST	AVG DIST	AVG DIST	AVG DIST	AVG DIST	AVG DIST	AVG DIST	AVG DIST	AVG DIST	AVG DIST	AVG DIST	AVG DIST	AVG DIST	AVG DIST	AVG DIST	AVG DIST	AVG DIST	AVG DIST	AVG DIST	AVG DIST
0.916	1.42	1.71	1.87	2.39	2.59	2.82	3.53	4.03	4.44	4.98	5.29	5.72	5.75	6.13	6.12	6.19	#DIV/0!	#DIV/0!	#DIV/0!	#DIV/0!	#DIV/0!	#DIV/0!	#DIV/0!	#DIV/0!	#DIV/0!	#DIV/0!	#DIV/0!	#DIV/0!	#DIV/0!	#DIV/0!	#DIV/0!	#DIV/0!	#DIV/0!	#DIV/0!	#DIV/0!	#DIV/0!	#DIV/0!	#DIV/0!	#DIV/0!	#DIV/0!
Onset of Anaphase A														End of Segregation		No visible spindles
091420_SMW46_EV_WithAux_01
Frame 1	Frame 2	Frame 3	Frame 4	Frame 5	Frame 6	Frame 7	Frame 8	Frame 9	Frame 10	Frame 11	Frame 12	Frame 13	Frame 14	Frame 15	Frame 16	Frame 17	Frame 18	Frame 19	Frame 20	Frame 21	Frame 22	Frame 23	Frame 24	Frame 25	Frame 26	Frame 27	Frame 28	Frame 29	Frame 30	Frame 31	Frame 32	Frame 33	Frame 34	Frame 35	Frame 36	Frame 37	Frame 38	Frame 39	Frame 40	Frame 41
1.09	1.42	1.85	2.1	2.71	3.1	3.4	3.8	4.05	4.23	4.42	4.79	5.12	5.43	6.1	6.22	6.13
AVG DIST	AVG DIST	AVG DIST	AVG DIST	AVG DIST	AVG DIST	AVG DIST	AVG DIST	AVG DIST	AVG DIST	AVG DIST	AVG DIST	AVG DIST	AVG DIST	AVG DIST	AVG DIST	AVG DIST	AVG DIST	AVG DIST	AVG DIST	AVG DIST	AVG DIST	AVG DIST	AVG DIST	AVG DIST	AVG DIST	AVG DIST	AVG DIST	AVG DIST	AVG DIST	AVG DIST	AVG DIST	AVG DIST	AVG DIST	AVG DIST	AVG DIST	AVG DIST	AVG DIST	AVG DIST	AVG DIST	AVG DIST
1.09	1.42	1.85	2.1	2.71	3.1	3.4	3.8	4.05	4.23	4.42	4.79	5.12	5.43	6.1	6.22	6.13	#DIV/0!	#DIV/0!	#DIV/0!	#DIV/0!	#DIV/0!	#DIV/0!	#DIV/0!	#DIV/0!	#DIV/0!	#DIV/0!	#DIV/0!	#DIV/0!	#DIV/0!	#DIV/0!	#DIV/0!	#DIV/0!	#DIV/0!	#DIV/0!	#DIV/0!	#DIV/0!	#DIV/0!	#DIV/0!	#DIV/0!	#DIV/0!
Onset of Anaphase A														End of Segregation		No visible spindles
Frame 1	Frame 2	Frame 3	Frame 4	Frame 5	Frame 6	Frame 7	Frame 8	Frame 9	Frame 10	Frame 11	Frame 12	Frame 13	Frame 14	Frame 15	Frame 16	Frame 17	Frame 18	Frame 19	Frame 20	Frame 21	Frame 22	Frame 23	Frame 24	Frame 25	Frame 26	Frame 27	Frame 28	Frame 29	Frame 30	Frame 31	Frame 32	Frame 33	Frame 34	Frame 35	Frame 36	Frame 37	Frame 38	Frame 39	Frame 40	Frame 41
AVG DIST	AVG DIST	AVG DIST	AVG DIST	AVG DIST	AVG DIST	AVG DIST	AVG DIST	AVG DIST	AVG DIST	AVG DIST	AVG DIST	AVG DIST	AVG DIST	AVG DIST	AVG DIST	AVG DIST	AVG DIST	AVG DIST	AVG DIST	AVG DIST	AVG DIST	AVG DIST	AVG DIST	AVG DIST	AVG DIST	AVG DIST	AVG DIST	AVG DIST	AVG DIST	AVG DIST	AVG DIST	AVG DIST	AVG DIST	AVG DIST	AVG DIST	AVG DIST	AVG DIST	AVG DIST	AVG DIST	AVG DIST
#DIV/0!	#DIV/0!	#DIV/0!	#DIV/0!	#DIV/0!	#DIV/0!	#DIV/0!	#DIV/0!	#DIV/0!	#DIV/0!	#DIV/0!	#DIV/0!	#DIV/0!	#DIV/0!	#DIV/0!	#DIV/0!	#DIV/0!	#DIV/0!	#DIV/0!	#DIV/0!	#DIV/0!	#DIV/0!	#DIV/0!	#DIV/0!	#DIV/0!	#DIV/0!	#DIV/0!	#DIV/0!	#DIV/0!	#DIV/0!	#DIV/0!	#DIV/0!	#DIV/0!	#DIV/0!	#DIV/0!	#DIV/0!	#DIV/0!	#DIV/0!	#DIV/0!	#DIV/0!	#DIV/0!
																					Onset of Anaphase A											End of Segregation			No visible spindles
Frame 1	Frame 2	Frame 3	Frame 4	Frame 5	Frame 6	Frame 7	Frame 8	Frame 9	Frame 10	Frame 11	Frame 12	Frame 13	Frame 14	Frame 15	Frame 16	Frame 17	Frame 18	Frame 19	Frame 20	Frame 21	Frame 22	Frame 23	Frame 24	Frame 25	Frame 26	Frame 27	Frame 28	Frame 29	Frame 30	Frame 31	Frame 32	Frame 33	Frame 34	Frame 35	Frame 36	Frame 37	Frame 38	Frame 39	Frame 40	Frame 41
AVG DIST	AVG DIST	AVG DIST	AVG DIST	AVG DIST	AVG DIST	AVG DIST	AVG DIST	AVG DIST	AVG DIST	AVG DIST	AVG DIST	AVG DIST	AVG DIST	AVG DIST	AVG DIST	AVG DIST	AVG DIST	AVG DIST	AVG DIST	AVG DIST	AVG DIST	AVG DIST	AVG DIST	AVG DIST	AVG DIST	AVG DIST	AVG DIST	AVG DIST	AVG DIST	AVG DIST	AVG DIST	AVG DIST	AVG DIST	AVG DIST	AVG DIST	AVG DIST	AVG DIST	AVG DIST	AVG DIST	AVG DIST
#DIV/0!	#DIV/0!	#DIV/0!	#DIV/0!	#DIV/0!	#DIV/0!	#DIV/0!	#DIV/0!	#DIV/0!	#DIV/0!	#DIV/0!	#DIV/0!	#DIV/0!	#DIV/0!	#DIV/0!	#DIV/0!	#DIV/0!	#DIV/0!	#DIV/0!	#DIV/0!	#DIV/0!	#DIV/0!	#DIV/0!	#DIV/0!	#DIV/0!	#DIV/0!	#DIV/0!	#DIV/0!	#DIV/0!	#DIV/0!	#DIV/0!	#DIV/0!	#DIV/0!	#DIV/0!	#DIV/0!	#DIV/0!	#DIV/0!	#DIV/0!	#DIV/0!	#DIV/0!	#DIV/0!
																					Onset of Anaphase A											End of Segregation			No visible spindles

## Sheet: klp-18 RNAi with auxin Raw Data
062920_SMW46_Klp-18_01
Frame 1	Frame 2	Frame 3	Frame 4	Frame 5	Frame 6	Frame 7	Frame 8	Frame 9	Frame 10	Frame 11	Frame 12	Frame 13	Frame 14	Frame 15	Frame 16	Frame 17	Frame 18	Frame 19	Frame 20	Frame 21	Frame 22	Frame 23	Frame 24	Frame 25	Frame 26	Frame 27	Frame 28	Frame 29	Frame 30	Frame 31	Frame 32	Frame 33	Frame 34	Frame 35	Frame 36	Frame 37	Frame 38	Frame 39	Frame 40	Frame 41
														0.82	0.99	0.981	1.54	1.76	1.84	2.61	3.34	4.2	4.54	4.9	5.49	5.48	5.39	5.59	5.57	5.62
														0.67	1.03	1.15	1.4	1.87	2.25	3.2	4.42	5.41	5.96	5.92	6.2	6.1	6.19	6.02	5.79	5.87
														0.93	0.78	1.18	1.44	2.11	2.32	2.57	3.71	4.17	4.64	5.11	5.46	5.83	5.79	5.87	5.72	5.69
														0.95	0.89	0.913	1.89	2.4	2.89	3.07	4.61	5.54	5.91	6.19	6.6	6.42	6.36	6.24	6.06	6.15
														0.72	1.01	0.99	1.12	1.56	1.94	2.08	2.41	3.03	3.24	3.76	3.91	3.92	3.82	4.1	4.1	4.08
														0.78	0.97	1.09	1.65	2.15	3.01	3.33	3.49	3.54	3.69	3.97	4.38	5.17	5.07	5.11	5.12	5.15
														0.79	0.95	1.07	1.28	1.76	2.88	3.16	3.97	4.38	4.81	4.94	5.43	5.25	5.65	5.56	5.5	5.63
														AVG DIST	AVG DIST	AVG DIST	AVG DIST	AVG DIST	AVG DIST	AVG DIST	AVG DIST	AVG DIST	AVG DIST	AVG DIST	AVG DIST	AVG DIST	AVG DIST	AVG DIST	AVG DIST	AVG DIST	AVG DIST	AVG DIST	AVG DIST	AVG DIST	AVG DIST	AVG DIST	AVG DIST	AVG DIST	AVG DIST	AVG DIST
														0.808571	0.945714	1.05343	1.47429	1.94429	2.44714	2.86	3.70714	4.32429	4.68429	4.97	5.35286	5.45286	5.46714	5.49857	5.40857	5.45571	#DIV/0!	#DIV/0!	#DIV/0!	#DIV/0!	#DIV/0!	#DIV/0!	#DIV/0!	#DIV/0!	#DIV/0!	#DIV/0!
									Monopole Breakdown					Onset of Anaphase A													End of Segregation			No visible spindles
062920_SMW46_Klp-18_02
Frame 1	Frame 2	Frame 3	Frame 4	Frame 5	Frame 6	Frame 7	Frame 8	Frame 9	Frame 10	Frame 11	Frame 12	Frame 13	Frame 14	Frame 15	Frame 16	Frame 17	Frame 18	Frame 19	Frame 20	Frame 21	Frame 22	Frame 23	Frame 24	Frame 25	Frame 26	Frame 27	Frame 28	Frame 29	Frame 30	Frame 31	Frame 32	Frame 33	Frame 34	Frame 35	Frame 36	Frame 37	Frame 38	Frame 39	Frame 40	Frame 41
												0.92	0.973	1.39	1.83	2.02	2.2	2.8	3.66	3.81	4.14	4.48	4.8	4.87	5.06	5.52	5.58	5.64
												1.01	1.25	1.63	1.78	2.22	2.55	2.99	3.35	3.82	3.85	4.26	4.38	5.12	5.22	6.03	6.05	6.12
												1.04	1.31	1.84	2.02	3.14	3.69	3.78	4.38	4.93	4.79	5.42	5.94	6.17	6.29	6.22	6.25	6.23
												0.85	1.41	2.22	2.4	3.15	3.45	3.78	4.3	4.86	4.84	5.23	5.71	6.12	6.28	6.19	6.18	6.16
												0.87	1.34	1.97	2.2	3.03	3.7	4.1	4.36	4.39	4.67	4.98	5.2	5.68	6.16	6.5	6.6	6.47
												0.93	1.23	1.54	1.75	2.44	3.09	3.67	4.93	5.2	5.67	5.98	6.2	5.58	6.1	6.24	6.33	6.42
												0.82	1.34	1.69	1.9	2.36	2.58	2.8	3.83	4.01	4.69	5.03	5.59	6.29	6.33	6.42	6.34	6.39
												0.96	1.51	1.89	2.09	2.58	3.53	3.92	4.07	4.15	4.7	5.03	5.58	5.52	5.68	5.63	5.71	5.8
												1.03	1.44	1.62	1.93	2.47	3.61	3.86	4.02	4.08	4.5	4.76	5.43	5.5	5.64	5.7	5.68	5.55
												AVG DIST	AVG DIST	AVG DIST	AVG DIST	AVG DIST	AVG DIST	AVG DIST	AVG DIST	AVG DIST	AVG DIST	AVG DIST	AVG DIST	AVG DIST	AVG DIST	AVG DIST	AVG DIST	AVG DIST	AVG DIST	AVG DIST	AVG DIST	AVG DIST	AVG DIST	AVG DIST	AVG DIST	AVG DIST	AVG DIST	AVG DIST	AVG DIST	AVG DIST
												0.936667	1.31144	1.75444	1.98889	2.60111	3.15556	3.52222	4.1	4.36111	4.65	5.01889	5.42556	5.65	5.86222	6.05	6.08	6.08667	#DIV/0!	#DIV/0!	#DIV/0!	#DIV/0!	#DIV/0!	#DIV/0!	#DIV/0!	#DIV/0!	#DIV/0!	#DIV/0!	#DIV/0!	#DIV/0!
							Monopole Breakdown					Onset of Anaphase A														End of Segregation		No visible spindles
080320_SMW46_Klp-18_01
Frame 1	Frame 2	Frame 3	Frame 4	Frame 5	Frame 6	Frame 7	Frame 8	Frame 9	Frame 10	Frame 11	Frame 12	Frame 13	Frame 14	Frame 15	Frame 16	Frame 17	Frame 18	Frame 19	Frame 20	Frame 21	Frame 22	Frame 23	Frame 24	Frame 25	Frame 26	Frame 27	Frame 28	Frame 29	Frame 30	Frame 31	Frame 32	Frame 33	Frame 34	Frame 35	Frame 36	Frame 37	Frame 38	Frame 39	Frame 40	Frame 41
																					0.82	0.85	1.18	1.54	2.05	3.13	3.42	3.93	4.14	5.09	5.32	5.57	6.19	6.89	6.64
																					0.97	1.13	1.88	2.2	2.57	3.3	3.84	4.41	5	5.28	5.78	6.21	6.8	7.13	6.9
																					0.88	0.92	1.3	1.54	1.96	2.38	3.58	3.71	3.74	3.92	4.19	4.26	4.23	4.16	4.54
																					1.03	1.16	1.77	2.18	2.32	3.23	3.98	4.14	4.26	4.53	4.68	4.63	4.94	4.77	4.87
																					0.96	0.94	1.12	1.45	1.56	1.87	2.41	3.14	3.58	3.95	4.11	4.29	4.49	4.42	4.38
																					AVG DIST	AVG DIST	AVG DIST	AVG DIST	AVG DIST	AVG DIST	AVG DIST	AVG DIST	AVG DIST	AVG DIST	AVG DIST	AVG DIST	AVG DIST	AVG DIST	AVG DIST	AVG DIST	AVG DIST	AVG DIST	AVG DIST	AVG DIST
																					0.932	1	1.45	1.782	2.092	2.782	3.446	3.866	4.144	4.554	4.816	4.992	5.33	5.474	5.466	#DIV/0!	#DIV/0!	#DIV/0!	#DIV/0!	#DIV/0!
							Monopole Breakdown														Onset of Anaphase A											End of Segregation			No visible spindles
102620_SMW46_Klp-18_02
Frame 1	Frame 2	Frame 3	Frame 4	Frame 5	Frame 6	Frame 7	Frame 8	Frame 9	Frame 10	Frame 11	Frame 12	Frame 13	Frame 14	Frame 15	Frame 16	Frame 17	Frame 18	Frame 19	Frame 20	Frame 21	Frame 22	Frame 23	Frame 24	Frame 25	Frame 26	Frame 27	Frame 28	Frame 29	Frame 30	Frame 31	Frame 32	Frame 33	Frame 34	Frame 35	Frame 36	Frame 37	Frame 38	Frame 39	Frame 40	Frame 41
				0.986	1.09	1.38	1.62	1.59	1.72	2.09	1.87	2.25	2.71	3.07	3.24	3.79	4.12	4.24
				0.911	1.01	1.19	1.26	1.4	1.85	1.71	2.18	2.61	2.69	3.61	3.9	4.28	4.47	4.63
				1.1	1.14	1.13	1.75	2.04	2.05	2.54	2.68	2.73	3.43	3.46	3.75	3.97	4.35	4.55
				0.972	1.02	1.32	1.6	1.82	2.08	2.22	2.24	2.47	3.23	3.3	3.69	4	4.67	4.89
				1	1.19	1.28	1.38	1.82	1.85	2.28	2.52	2.67	3.59	3.67	4.02	4.66	4.87	5.02
				1.11	1.27	1.26	1.6	1.7	2.39	2.22	2.16	2.38	3.02	3.49	3.72	4.04	4.38	4.49
				0.952	0.983	1.18	1.39	1.56	1.94	1.93	2.07	2.62	2.79	3.01	3.51	3.7	4.38	4.42
				1.06	1.19	1.44	1.49	1.5	2.18	2.33	2.28	2.8	3.15	3.62	3.94	4.46	5.22	5.31
				AVG DIST	AVG DIST	AVG DIST	AVG DIST	AVG DIST	AVG DIST	AVG DIST	AVG DIST	AVG DIST	AVG DIST	AVG DIST	AVG DIST	AVG DIST	AVG DIST	AVG DIST	AVG DIST	AVG DIST	AVG DIST	AVG DIST	AVG DIST	AVG DIST	AVG DIST	AVG DIST	AVG DIST	AVG DIST	AVG DIST	AVG DIST	AVG DIST	AVG DIST	AVG DIST	AVG DIST	AVG DIST	AVG DIST	AVG DIST	AVG DIST	AVG DIST	AVG DIST
				0.999	1.08	1.23333	1.54333	1.67667	1.87333	2.11333	2.24333	2.546	3.13	3.422	3.72	4.14	4.496	4.666	#DIV/0!	#DIV/0!	#DIV/0!	#DIV/0!	#DIV/0!	#DIV/0!	#DIV/0!	#DIV/0!	#DIV/0!	#DIV/0!	#DIV/0!	#DIV/0!	#DIV/0!	#DIV/0!	#DIV/0!	#DIV/0!	#DIV/0!	#DIV/0!	#DIV/0!	#DIV/0!	#DIV/0!	#DIV/0!
				Onset of Anaphase A														End of Segregation		No visible spindles
102620_SMW46_Klp-18_03
Frame 1	Frame 2	Frame 3	Frame 4	Frame 5	Frame 6	Frame 7	Frame 8	Frame 9	Frame 10	Frame 11	Frame 12	Frame 13	Frame 14	Frame 15	Frame 16	Frame 17	Frame 18	Frame 19	Frame 20	Frame 21	Frame 22	Frame 23	Frame 24	Frame 25	Frame 26	Frame 27	Frame 28	Frame 29	Frame 30	Frame 31	Frame 32	Frame 33	Frame 34	Frame 35	Frame 36	Frame 37	Frame 38	Frame 39	Frame 40	Frame 41
1.02	1.18	1.22	1.52	1.65	1.84	2.04	2.12	2.29	2.65	2.75	3.17	3.35	3.49	3.67	3.82	3.91	3.98
0.963	1.22	1.26	1.4	1.61	1.73	1.77	2.15	1.97	2.11	2.25	2.42	3.21	3.26	3.58	3.69	3.84	3.97
1.04	1.09	1.12	1.18	1.31	1.34	1.55	1.89	2.06	2.55	2.8	2.64	2.94	3.25	3.5	3.78	3.99	4.07
1.22	1.23	1.25	1.4	1.58	1.93	1.98	2.34	2.78	3.25	3.38	3.53	3.85	4.41	4.73	5.02	5.13	5.16
1.12	1.19	1.24	1.37	1.54	1.59	1.81	1.95	2.98	3	3.32	3.5	3.77	4.31	4.69	5.11	5.19	5.28
1.07	1.2	1.26	1.72	2.23	2.33	3.04	3.32	3.69	3.52	3.98	4.52	4.53	4.67	4.87	5.07	5.21	5.31
AVG DIST	AVG DIST	AVG DIST	AVG DIST	AVG DIST	AVG DIST	AVG DIST	AVG DIST	AVG DIST	AVG DIST	AVG DIST	AVG DIST	AVG DIST	AVG DIST	AVG DIST	AVG DIST	AVG DIST	AVG DIST	AVG DIST	AVG DIST	AVG DIST	AVG DIST	AVG DIST	AVG DIST	AVG DIST	AVG DIST	AVG DIST	AVG DIST	AVG DIST	AVG DIST	AVG DIST	AVG DIST	AVG DIST	AVG DIST	AVG DIST	AVG DIST	AVG DIST	AVG DIST	AVG DIST	AVG DIST	AVG DIST
1.07217	1.185	1.225	1.43167	1.65333	1.79333	2.03167	2.295	2.62833	2.84667	3.08	3.29667	3.60833	3.89833	4.17333	4.415	4.545	4.62833	#DIV/0!	#DIV/0!	#DIV/0!	#DIV/0!	#DIV/0!	#DIV/0!	#DIV/0!	#DIV/0!	#DIV/0!	#DIV/0!	#DIV/0!	#DIV/0!	#DIV/0!	#DIV/0!	#DIV/0!	#DIV/0!	#DIV/0!	#DIV/0!	#DIV/0!	#DIV/0!	#DIV/0!	#DIV/0!	#DIV/0!
Onset of Anaphase A															End of Segregation		No visible spindles
